# Supplementary material
Source: Research Square preprint supplement (doi:10.21203/rs.3.rs-9358842/v1)
Supplement: Supplementary file 1 [file a976c1469547288e54f7ed5e.xlsx]

## Sheet: Data for PB
Ref	Gender	Course	AAI	FPK1	FPK2	FPK3	FPK4	FPK5	FPK	IKSD1	IKSD2	IKSD3	IKSD	EKSD1	EKSD2	EKSD3	OnPP1	OnPP2	OnPP3	OnPP4	OnPP5	OffPP1	OffPP2	OffPP3	OffPP4	OffPP5	OffPP6	OffPP7	OffPP8	OffPP9	WED	CYPC	CR	ITPAI	IDFDRR	ALSIBC	WHD	EH	OffPP	PKAB1	PKAB2	PKAB3	PKAB4	PKAB5	PKAB6	PKAB7	PKAB	EKSD	OnPP
10010001012-22601-22602	0	0	4	1	7	1	1	1	11	3	4	2	9	4	1	2	2	5	1	0	2	1	0	0	0	3	3	2	1	5	0	1	1	0	0	0	0	0	17	4	2	1	3	3	4	1	18	7	10
10010002110	0	0	3	1	2	0	1	1	5	3	3	5	11	5	2	3	1	1	1	0	1	2	0	0	0	3	1	1	1	3	0	0	1	0	0	0	0	0	12	5	2	2	4	2	1	1	17	10	4
10010003100	0	0	7	1	1	1	1	0	4	3	3	3	9	3	3	3	1	1	1	0	1	1	0	0	0	3	3	1	1	1	0	0	0	0	0	0	0	0	10	2	2	1	1	1	2	1	10	9	4
10010004001-20205	0	0	13	1	6	1	1	0	9	3	3	3	9	3	2	3	2	1	1	0	1	2	0	0	0	5	2	1	1	3	0	1	1	0	0	0	0	0	16	6	2	1	3	2	2	3	19	8	5
10010005100	0	0	2	0	0	1	1	0	2	2	3	3	8	3	2	3	2	1	1	0	1	1	0	0	0	3	1	1	1	1	0	0	1	0	0	0	0	0	9	3	2	1	1	2	4	1	14	8	5
10010006000	0	0	4	1	1	1	0	0	3	3	4	4	11	3	1	3	4	5	4	1	4	2	0	0	0	5	5	5	1	5	1	1	1	0	0	0	1	1	28	4	2	5	3	6	4	3	27	7	18
10010007000	0	0	4	1	4	1	1	1	8	1	3	2	6	4	3	3	2	3	1	0	2	1	0	0	0	1	2	1	1	2	0	1	1	0	0	0	0	1	11	4	3	2	4	3	3	1	20	10	8
10010008010	0	0	15	1	2	1	0	0	4	3	3	3	9	3	3	3	2	1	1	0	1	1	0	0	0	1	1	1	1	1	1	1	1	0	0	0	0	0	9	5	3	1	1	1	1	1	13	9	5
10010009000	0	0	3	1	3	1	1	0	6	4	3	3	10	3	1	1	3	2	1	0	1	1	0	0	1	1	2	1	1	1	0	1	0	0	0	0	0	0	9	5	3	2	2	2	2	1	17	5	7
10010010000	0	0	5	0	5	1	1	0	7	5	5	5	15	5	3	3	3	1	1	0	1	1	0	0	0	1	1	1	1	1	0	1	1	0	0	0	0	1	9	6	3	3	2	1	2	1	18	11	6
10010011010	1	1	10	0	1	1	1	0	3	3	3	3	9	3	1	3	3	1	1	0	1	2	0	1	1	3	1	1	1	1	0	0	1	0	0	0	0	1	13	6	2	2	2	2	4	1	19	7	6
10010012000	0	0	9	0	3	1	1	0	5	3	3	3	9	3	2	4	2	1	1	0	1	1	0	0	1	2	1	1	1	1	0	0	0	0	0	0	0	0	8	4	3	1	1	2	3	1	15	9	5
10010013010	1	0	5	1	0	1	0	0	2	3	3	3	9	3	3	3	2	2	1	0	1	1	0	0	0	1	2	1	1	1	0	1	0	0	0	0	0	0	8	3	2	1	1	1	4	1	13	9	6
10010014010	0	0	2	1	2	1	1	0	5	3	3	3	9	3	2	3	1	2	2	0	1	1	0	0	0	1	2	1	1	1	0	0	0	0	0	0	0	0	7	3	3	1	2	2	1	1	13	8	6
10010015010	0	0	5	1	1	1	1	0	4	2	3	4	9	3	2	1	1	2	1	0	1	1	0	0	0	1	1	1	1	2	1	1	1	0	0	0	0	0	10	2	2	1	1	1	4	1	12	6	5
10010016000	0	1	6	1	6	1	1	1	10	3	4	4	11	5	3	3	1	1	1	0	5	1	0	0	1	1	1	1	1	1	0	0	1	0	0	1	0	0	9	6	3	5	3	1	1	1	20	11	8
10010017110	0	0	2	1	0	0	1	0	2	1	1	1	3	1	5	1	2	3	2	0	1	1	0	0	1	5	2	1	1	1	0	1	1	0	0	0	0	1	15	1	2	2	2	3	1	1	12	7	8
10010018010	0	0	4	1	3	0	0	0	4	3	4	3	10	1	1	1	3	1	1	0	1	1	0	0	0	1	1	1	1	1	0	0	0	0	0	0	0	0	6	4	2	1	2	1	4	1	15	3	6
10010019000	0	1	10	1	2	1	1	0	5	3	3	2	8	4	3	2	5	1	1	0	1	1	0	0	0	2	1	1	1	1	0	1	1	0	0	0	1	0	10	6	3	2	3	3	1	1	19	9	8
10010020000	0	0	4	0	0	1	1	1	3	3	3	3	9	2	2	3	2	1	1	0	1	1	0	0	1	4	3	1	1	1	0	0	0	0	0	0	0	0	12	5	4	2	3	4	4	1	23	7	5
10010021000	0	0	3	0	2	1	1	1	5	3	3	3	9	2	2	2	2	3	1	0	1	1	0	0	0	2	2	1	1	1	0	0	1	0	0	0	0	0	9	5	2	1	1	3	1	1	14	6	7
10010022000	0	0	#NULL!	1	5	1	1	0	8	2	4	4	10	5	4	4	3	3	1	0	2	2	0	0	0	1	3	1	1	1	0	0	0	0	0	0	0	0	9	6	3	3	3	3	2	2	22	13	9
10010023000	0	0	9	1	5	1	1	0	8	2	4	3	9	3	3	3	3	3	3	0	3	2	0	0	0	3	2	1	1	1	0	1	0	0	0	0	0	0	11	5	3	1	3	4	5	1	22	9	12
10010024000	1	1	8	1	1	1	1	1	5	2	4	2	8	4	4	1	2	1	1	0	1	1	0	0	0	3	1	1	1	1	0	0	1	0	0	0	0	0	9	5	3	1	2	3	4	1	19	9	5
10010025000	0	0	#NULL!	1	5	1	1	0	8	3	3	3	9	5	3	3	3	1	1	0	1	1	0	0	0	3	1	1	1	1	0	1	1	0	0	0	0	1	11	4	3	3	4	3	2	2	21	11	6
10010026000	1	0	2	1	1	0	1	0	3	3	3	3	9	3	2	1	1	5	1	0	1	1	1	1	0	3	3	1	1	1	0	1	1	0	0	0	0	0	14	3	2	1	1	2	1	1	11	6	8
10010027000	0	0	7	1	3	1	1	1	7	1	1	1	3	2	2	2	1	1	1	0	1	1	0	0	0	4	1	1	1	1	0	0	0	0	0	0	0	0	9	6	3	1	1	1	3	1	16	6	4
10010028000	0	0	8	0	1	1	1	1	4	2	3	2	7	4	2	1	2	1	1	0	1	1	0	0	1	1	1	1	1	1	0	0	0	0	0	0	0	0	7	4	2	1	1	1	1	1	11	7	5
10010029000	0	0	2	1	7	1	1	0	10	1	3	3	7	3	5	3	1	1	1	0	1	1	0	0	0	1	1	1	1	1	0	0	0	0	0	0	0	0	6	5	2	1	1	1	5	1	16	11	4
10010030010	1	0	2	1	3	1	1	0	6	3	4	3	10	3	2	1	4	1	1	0	1	1	0	0	0	1	5	1	3	1	0	0	1	0	0	0	0	0	13	6	4	4	4	4	6	4	32	6	7
10010031000	0	0	6	1	3	0	1	0	5	2	3	4	9	1	2	3	3	3	1	0	1	1	0	0	1	4	2	1	1	1	0	1	0	0	0	0	0	0	12	6	3	5	2	3	1	1	21	6	8
10010032000	1	0	#NULL!	1	1	1	1	0	4	3	3	3	9	1	3	3	1	3	1	1	2	1	0	1	0	2	1	1	2	1	0	0	0	0	0	0	0	0	9	5	2	3	2	3	4	2	21	7	8
10010033000	1	0	5	1	0	1	1	0	3	3	3	3	9	3	1	4	3	3	1	0	1	2	0	0	0	4	1	1	1	5	0	0	0	0	0	0	0	0	14	5	2	2	3	3	2	2	19	8	8
10010034000	0	0	6	1	1	1	1	1	5	1	2	3	6	1	2	3	1	2	1	0	1	1	0	0	0	2	1	1	1	1	0	0	0	0	0	0	0	1	8	4	2	1	1	2	3	1	14	6	5
10010035000	1	0	1	1	1	1	1	0	4	3	4	4	11	4	3	3	1	3	1	0	1	1	0	0	0	4	2	1	1	1	0	0	0	0	0	0	0	0	10	3	3	1	3	2	4	1	17	10	6
10010036010	0	0	3	0	1	0	0	0	1	3	3	3	9	1	1	1	1	3	1	0	1	1	0	0	0	2	1	1	1	1	0	0	0	0	0	0	0	0	7	3	2	1	1	3	1	1	12	3	6
10010037000	1	0	8	0	0	1	1	0	2	3	3	3	9	3	2	1	2	3	1	0	1	1	0	0	0	2	1	2	1	1	0	1	0	0	0	0	0	0	9	3	2	1	1	2	1	2	12	6	7
10010038010	0	0	4	0	2	1	1	0	4	2	3	1	6	3	1	3	2	1	1	0	2	1	0	0	0	4	1	1	2	1	0	1	0	0	0	0	0	0	11	3	2	1	2	2	3	2	15	7	6
10010039000	1	0	7	1	0	0	1	0	2	4	5	3	12	4	3	4	4	3	2	0	2	1	1	1	1	2	1	1	4	5	1	0	1	0	0	0	0	1	20	5	2	3	4	3	2	1	20	11	11
10010040010	0	0	6	0	0	1	0	1	2	3	3	2	8	1	2	1	2	1	1	0	1	1	0	0	0	1	1	1	1	1	0	0	0	0	0	0	0	0	6	4	3	1	2	1	2	1	14	4	5
10010041000	1	0	1	1	2	0	1	1	5	3	4	3	10	4	2	2	1	1	1	0	1	1	0	1	0	4	2	1	1	1	0	0	1	0	0	0	0	0	12	5	3	1	2	2	2	1	16	8	4
10010042010	0	0	5	1	2	0	0	0	3	1	2	5	8	5	5	1	2	1	1	0	1	1	0	1	1	1	1	1	1	1	0	0	0	0	0	0	0	0	8	2	1	1	1	2	1	1	9	11	5
10010043000	0	0	11	1	4	1	1	0	7	3	3	4	10	4	4	3	3	5	2	0	5	2	0	0	0	3	1	1	1	1	0	0	1	0	0	0	0	0	10	6	4	3	2	3	6	1	25	11	15
10010044010	1	0	2	0	1	0	1	0	2	1	1	1	3	1	1	1	1	1	1	0	1	1	0	0	0	2	1	1	1	1	0	0	0	0	0	0	0	0	7	1	1	1	1	1	1	1	7	3	4
10010045000	0	0	5	1	7	1	1	1	11	3	3	3	9	4	3	3	2	3	1	0	1	2	0	0	0	1	2	1	1	1	0	1	0	0	0	0	0	0	9	4	3	1	2	3	3	1	17	10	7
10010046010	1	0	9	1	1	1	1	0	4	3	3	2	8	4	1	2	1	1	1	0	1	1	0	1	0	3	2	1	1	1	0	0	0	0	0	0	0	1	11	6	3	1	1	2	2	1	16	7	4
10010047000	1	1	5	1	3	0	1	0	5	4	4	4	12	4	3	5	3	5	2	0	1	3	1	0	0	3	2	1	1	5	0	1	0	0	0	0	0	1	18	5	3	3	3	3	2	2	21	12	11
10010048010	1	0	6	1	0	0	1	0	2	3	2	3	8	3	3	4	2	3	1	0	1	1	0	0	0	4	2	1	1	1	0	0	0	0	0	1	0	0	11	4	3	3	4	5	2	1	22	10	7
10010049010	0	0	6	1	1	1	1	1	5	3	3	3	9	4	1	1	1	4	1	0	1	1	0	0	0	5	5	1	1	1	0	1	0	0	0	0	0	0	15	5	2	1	1	4	5	1	19	6	7
10010050010	0	0	5	0	1	1	1	1	4	3	3	3	9	5	2	1	1	1	1	0	1	1	0	0	0	1	1	1	1	1	0	0	0	0	0	0	0	0	6	5	3	1	1	1	1	1	13	8	4
10010051000	0	0	3	1	1	0	1	1	4	1	2	3	6	3	3	4	2	3	1	0	1	1	0	0	0	3	1	1	1	1	0	1	1	0	0	0	0	0	10	6	4	1	2	3	6	1	23	10	7
10010052010	1	0	1	0	1	0	0	0	1	3	3	3	9	1	1	1	2	3	2	0	1	2	0	0	0	2	1	1	1	1	0	0	0	0	0	0	0	0	8	4	2	2	2	2	5	2	19	3	8
10010053010	1	0	6	1	0	1	0	0	2	3	4	3	10	4	4	4	1	1	1	0	1	1	0	0	0	1	1	1	1	1	0	0	0	0	0	0	0	0	6	2	1	1	1	1	1	1	8	12	4
10010054000	0	0	4	1	6	1	1	0	9	2	2	3	7	3	2	1	2	1	1	0	3	1	0	0	0	2	1	1	1	1	0	1	1	0	0	0	0	0	9	4	3	2	2	2	2	1	16	6	7
10010055010	0	0	2	0	0	1	1	1	3	3	3	3	9	4	3	3	2	1	1	0	1	1	1	1	0	3	2	4	1	1	0	0	0	0	0	0	0	1	15	5	3	2	2	2	4	2	20	10	5
10010056010	0	0	4	1	2	1	0	0	4	3	3	3	9	5	2	2	1	1	1	0	1	1	0	0	0	5	1	1	1	1	0	1	1	0	0	0	0	0	12	6	2	1	1	1	1	1	13	9	4
10010057000	0	0	4	1	2	1	1	1	6	3	3	3	9	3	3	2	2	1	1	0	1	1	0	0	0	1	1	1	1	1	1	1	1	0	0	0	0	1	10	6	4	2	1	2	3	1	19	8	5
10020001001-10007	0	0	2	1	2	1	1	0	5	4	3	3	10	4	3	3	3	2	2	0	2	1	0	0	0	2	1	1	3	2	1	0	0	0	0	0	0	0	11	6	4	3	3	1	3	1	21	10	9
10020002010	1	0	5	1	1	1	0	0	3	3	4	3	10	3	3	3	1	2	1	0	1	1	0	0	0	2	2	1	1	1	0	0	0	0	0	0	0	0	8	5	2	2	2	2	4	1	18	9	5
10020003000	0	0	4	1	2	1	0	0	4	1	3	2	6	1	1	1	2	5	2	0	1	2	0	0	1	5	5	1	1	5	0	1	1	0	0	0	0	1	23	6	4	4	3	3	6	1	27	3	10
10020004100	0	0	3	1	2	1	1	1	6	4	3	2	9	1	3	4	3	2	1	0	1	1	0	0	0	3	1	1	1	2	0	0	0	0	0	0	0	1	10	4	2	2	1	2	5	1	17	8	7
10020005000	0	0	10	1	1	1	0	0	3	5	5	5	15	5	4	4	1	1	1	0	1	1	0	0	0	1	2	1	1	1	0	0	1	0	0	0	0	0	8	5	2	1	1	1	4	1	15	13	4
10020006000	1	0	11	1	1	1	0	0	3	4	4	3	11	2	3	4	3	5	3	1	2	3	0	0	0	5	5	1	1	5	0	1	1	0	0	0	0	0	22	5	4	6	4	4	1	4	28	9	14
10020007010	0	0	3	1	2	1	1	0	5	3	3	3	9	5	1	1	1	2	1	0	1	1	0	0	0	1	2	1	1	1	0	0	0	0	0	0	0	0	7	3	2	2	2	2	6	2	19	7	5
10020008010-10009	1	0	#NULL!	1	2	0	1	0	4	2	3	2	7	2	5	5	1	1	1	0	2	1	0	0	0	1	1	1	1	1	0	1	0	0	0	0	0	0	7	3	2	1	1	1	3	1	12	12	5
10020009100	0	0	6	1	1	1	1	0	4	3	3	2	8	5	3	3	4	2	1	0	1	1	0	0	0	1	1	1	1	1	0	1	1	0	0	0	0	0	8	6	4	1	1	1	3	1	17	11	8
10020010000	0	0	2	1	0	0	1	0	2	3	4	3	10	4	2	4	3	1	2	0	1	2	0	0	0	4	2	1	1	3	0	1	1	0	0	0	0	0	15	6	5	3	5	1	1	6	27	10	7
10020011010	1	0	4	1	0	0	0	1	2	3	3	2	8	3	3	3	2	1	1	0	1	1	0	0	0	3	1	1	1	1	0	0	0	0	0	0	0	0	8	2	2	1	2	2	3	2	14	9	5
10020012000	0	0	8	0	0	0	1	0	1	3	3	3	9	3	2	3	2	2	1	0	2	2	0	0	0	4	1	1	1	1	0	0	1	0	0	0	0	0	11	3	2	1	1	3	2	1	13	8	7
10020013100	1	0	1	1	0	1	1	0	3	3	3	3	9	3	2	2	1	3	1	0	1	1	0	0	0	4	1	1	1	5	0	0	0	0	0	0	0	1	14	3	2	2	3	2	1	1	14	7	6
10020014000	0	0	5	1	0	1	1	1	4	1	2	1	4	1	2	1	2	3	1	0	1	1	0	0	0	2	2	1	1	1	0	0	0	0	0	0	0	1	9	2	2	1	1	1	2	1	10	4	7
10020015100	0	0	5	1	1	1	1	0	4	1	2	3	6	3	3	4	3	3	1	0	2	2	0	0	0	5	4	1	1	1	0	1	1	0	0	0	0	0	16	5	3	1	2	2	4	2	19	10	9
10020016000	0	0	7	1	2	1	1	0	5	5	5	5	15	4	4	2	2	5	1	0	1	1	0	0	0	5	1	1	1	1	0	0	1	0	0	0	0	0	11	5	3	1	2	3	4	1	19	10	9
10020017000	0	0	4	1	2	1	0	1	5	2	2	2	6	3	3	3	3	2	4	0	1	1	0	0	0	1	1	1	1	1	0	0	0	0	0	0	0	0	6	1	1	1	1	1	6	1	12	9	10
10020018010	0	1	3	1	0	1	1	0	3	4	4	4	12	3	2	4	1	2	2	1	2	2	0	0	0	2	2	1	1	1	0	1	0	0	0	0	1	1	12	5	3	2	2	2	1	2	17	9	8
10020019000	0	0	10	1	1	1	1	0	4	4	4	4	12	1	3	4	3	1	1	0	1	2	0	0	0	3	1	1	1	1	0	0	0	0	0	0	0	0	9	6	5	4	2	2	2	1	22	8	6
10020020000	1	0	4	1	0	1	1	0	3	3	3	2	8	4	2	4	1	1	1	0	1	1	0	0	0	4	1	1	1	5	0	1	0	0	0	0	0	1	15	6	3	3	2	4	3	1	22	10	4
10020021000	1	0	1	0	2	1	1	0	4	5	5	5	15	3	5	5	4	5	2	0	3	2	0	1	0	3	1	1	1	2	0	1	1	0	0	0	0	1	14	6	5	3	6	3	2	2	27	13	14
10020022010	0	0	3	0	1	1	1	0	3	2	3	2	7	4	4	2	1	1	1	0	1	1	0	0	0	3	3	1	1	1	0	1	1	0	0	0	0	0	12	3	2	2	2	3	4	1	17	10	4
10020023000	1	0	3	1	2	1	1	0	5	1	1	1	3	3	3	3	1	1	1	0	1	1	0	0	0	1	1	1	1	1	0	0	1	0	0	0	0	1	8	5	2	1	1	1	2	1	13	9	4
10020024000	1	0	2	1	5	1	1	0	8	3	3	3	9	3	1	1	3	1	1	0	1	1	0	0	0	3	2	1	1	1	0	1	1	0	0	0	0	0	11	6	3	2	3	2	3	1	20	5	6
10020025000	1	0	3	1	2	0	1	0	4	3	3	2	8	4	4	1	1	1	1	0	1	1	0	0	0	5	1	1	1	1	0	0	0	0	0	0	0	0	10	3	2	1	1	1	1	1	10	9	4
10020026110	0	0	1	1	1	0	1	0	3	1	3	2	6	1	1	1	1	1	1	1	1	1	0	0	0	3	1	1	1	1	0	0	0	0	0	0	0	0	8	1	1	1	1	1	1	1	7	3	5
10020027000	0	0	11	1	4	1	1	0	7	3	2	2	7	4	1	3	1	5	1	0	1	1	0	0	0	2	5	1	1	1	1	1	1	0	0	0	0	0	14	4	3	2	2	2	1	1	15	8	8
10020028010	0	0	4	1	0	0	1	0	2	2	3	3	8	1	1	2	2	3	1	0	1	1	0	1	1	3	1	1	1	1	0	0	0	0	0	0	0	0	10	4	3	1	2	2	1	1	14	4	7
10020029100	0	0	2	1	1	0	1	0	3	4	4	4	12	4	3	4	2	3	1	0	1	1	0	0	0	1	1	1	1	2	0	0	0	0	0	0	0	0	7	2	2	1	2	1	2	2	12	11	7
10020030001-10002	1	#NULL!	1	1	0	1	0	0	2	4	5	4	13	3	3	4	2	2	3	1	3	3	1	0.773156	1	3	3	3	3	2	0	0	0	0	0	0	0	0	19.7732	2	1	2	3	2	2	2	14	10	11
10020031000	0	0	2	1	0	0	0	0	1	4	4	4	12	3	3	3	4	2	4	1	2	2	1	1	0	3	2	2	2	2	0	0	0	0	0	0	0	0	15	5	4	5	5	5	2	5	31	9	13
10020032110	0	0	2	0	2	1	1	0	4	1	4	2	7	1	3	3	2	1	1	0	1	2	0	0	0	2	2	1	1	1	0	0	1	0	0	0	0	0	10	4	2	1	1	2	5	1	16	7	5
10020033110	0	0	2	1	2	1	1	0	5	2	2	2	6	3	1	3	3	1	1	0	1	1	0	0	1	3	1	1	1	1	0	0	1	0	0	0	0	0	10	5	3	5	3	2	4	5	27	7	6
10020034010	0	0	1	0	0	0	0	0	0	3	3	3	9	2	1	1	1	1	1	0	1	1	0	0	0	1	1	1	1	1	1	1	1	0	0	0	0	1	10	3	1	1	4	1	3	1	14	4	4
10020035010	0	0	20	1	2	1	1	0	5	2	4	4	10	2	4	4	3	4	3	0	1	1	0	0	0	5	1	1	1	1	1	1	0	0	0	0	0	0	12	4	3	1	1	2	1	1	13	10	11
10020036000	1	0	4	1	3	1	1	0	6	1	1	2	4	3	2	3	2	1	2	0	1	2	0	0	1	1	1	2	1	1	0	0	0	0	0	0	0	0	9	3	4	2	2	2	2	1	16	8	6
10020037000	1	0	8	1	6	1	1	0	9	3	3	1	7	5	4	1	2	1	1	0	1	1	0	0	0	2	2	1	1	1	0	0	1	0	0	0	0	1	10	6	3	2	2	2	6	2	23	10	5
10020038000	1	0	2	0	0	1	0	0	1	3	3	2	8	3	3	3	3	1	3	0	1	3	0	0	0	2	2	1	1	1	0	0	1	0	0	0	0	0	11	2	2	5	3	3	3	4	22	9	8
10020039000	1	0	4	1	1	1	1	0	4	5	5	5	15	3	5	1	1	1	1	-0.0678229	1	1	0	0	0	1	1	1	1	1	0	0	0	0	0	0	0	0	6	6	3	3	1	1	1	1	16	9	3.93218
10020040000	0	0	20	1	3	1	1	0	6	4	5	3	12	4	5	5	2	1	2	1	2	2	0	1	1	2	1	1	1	2	0	0	1	0	0	0	0	0	12	2	3	2	3	2	2	3	17	14	8
10020041012-20203-20403	1	0	#NULL!	1	2	0	1	0	4	3	3	3	9	4	1	1.82786	1	1.44398	1	0	1	1	0	0	0	2	1	1	1	1	0	0	1	0	0	0	0	0	8	3	2	1	1	2	4	1	14	6.82786	4.44398
10020042000	0	0	6	1	1	1	1	0	4	1	2	1	4	5	4	3	1	2	1	0	1	1	0	0	0	1	2	1	1	1	0	1	0	0	0	0	0	0	8	3	1	1	1	1	1	1	9	12	5
10020043000	0	0	3	1	2	1	1	0	5	2	2	2	6	3	2	3	1	2	1	0	1	1	0	0	0	2	1	1	1	1	0	1	1	0	0	0	1	0	10	3	3	1	2	2	1	2	14	8	5
10020044000	0	0	9	1	2	1	1	0	5	3	4	3	10	3	2	2	2	1	1	0	1	1	0	0	0	1	1	1	1	1	0	1	0	0	0	0	0	1	8	4	3	1	1	2	2	1	14	7	5
10020045010	0	0	6	0	1	1	1	0	3	3	3	3	9	3	3	3	1	1	1	0	1	1	0	0	0	1	1	1	1	1	0	1	1	0	0	0	0	0	8	6	2	1	2	2	1	1	15	9	4
10020046000	0	0	10	1	2	1	1	0	5	3	3	3	9	4	3	3	3	5	1	1	1	1	0	1	1	5	1	1	1	1	0	1	0	1	0	0	0	1	15	4	4	3	2	3	1	1	18	10	11
10020047010	0	0	6	1	0	0	1	0	2	2	4	2	8	4	2	3	1	1	1	0	1	1	0	0	0	2	1	1	1	1	0	0	1	0	0	0	0	0	8	4	2	1	1	2	2	1	13	9	4
10020048100	1	0	7	0	0	0	0	0	0	3	3	3	9	4	2	3	1	2	1	0	1	1	0	0	0	3	1	1	1	1	0	0	0	0	0	0	0	0	8	6	3	1	2	2	6	1	21	9	5
10020049100	0	0	4	1	2	0	1	0	4	4	5	4	13	2	1	1	3	4	1	0	1	1	0	0	0	3	2	1	1	2	0	0	1	0	0	1	0	0	12	5	5	2	3	3	4	1	23	4	9
10020050110	0	0	3	1	0	0	0	0	1	3	3	2	8	3	2	1	1	3	1	0	1	1	0	0	0	3	2	1	1	1	0	0	0	0	0	0	0	0	9	2	1	1	1	2	2	1	10	6	6
10020051000	0	0	6	1	0	1	0	0	2	2	3	2	7	3	4	4	2	1	1	0	1	1	0	0	0	3	1	1	1	1	0	0	0	0	0	0	0	0	8	3	2	1	3	4	2	2	17	11	5
10020052000	1	0	3	0	2	0	1	0	3	3	4	3	10	3	3	1	3	1	1	1	1	1	0	0	0	4	1	1	1	1	1	1	1	0	0	0	0	0	12	4	3	4	3	3	1	3	21	7	7
10020053000	1	0	4	1	0	0	1	0	2	2	2	3	7	4	3	3	1	1	1	0	1	1	0	0	0	1	1	1	5	1	0	1	0	0	0	0	0	0	11	5	3	3	3	3	2	1	20	10	4
10020054001-10007	0	0	5	1	2	1	1	0	5	3	3	3	9	3	3	3	1	2	3	0.252407	2	1	0	0	0	2	1	1	1	2	1	0	0	0	0	0	0	0	9	2	3	1	2	2	2	3	15	9	8.25241
10020055110	0	0	4	1	4	1	1	0	7	2	1	1	4	3	4	4	1	1	1	0	1	1	0	0	0	1	1	1	1	1	0	0	0	0	0	0	0	1	7	6	4	1	3	2	1	3	20	11	4
10020056100	1	1	7	1	4	1	1	0	7	2	3	3	8	3	3	3	1	1	1	0	1	1	0	0	0	2	1	1	1	1	0	0	1	0	0	0	0	1	9	3	2	2	2	2	2	2	15	9	4
10020057012-21605-21606	0	0	3	1	0	0	0	0	1	1	1	1	3	1	1	3	1	1	1	0	1	1	0	0	0	1	1	1	1	1	0	0	0	0	0	0	0	0	6	2	1	1	1	1	1	1	8	5	4
10020058000	1	0	6	0	1	0	1	0	2	2	3	3	8	3	3	2	1	2	1	0	1	1	0	0	0	2	1	1	1	3	0	1	1	0	0	0	0	1	12	4	3	1	2	1	4	1	16	8	5
10020059000	0	0	4	1	1	1	1	0	4	5	5	3	13	4	3	4	3	1	1	0	1	1	0	0	0	1	1	1	1	1	0	0	1	0	0	0	0	0	7	6	5	2	2	2	2	2	21	11	6
10031001004-21104-21405-22403-22803	1	1	1	1	0	1	1	0	3	1	1	1	3	1	1	2	3	3	3	1	2	2	1	0.530632	1	2	4	5	5	5	0	1	1	0	0	0	0	0	27.5306	2	2	2	5	6	3.33963	5	25.3396	4	12
10031002011-22503	0	0	12	1	5	0	1	0	7	2	2	2	6	1	3	1	1	1	1	0	1	1	0	0	0	1	1	1	1	1	0	0	0	0	0	0	0	0	6	4	3	1	1	1	1	1	12	5	4
10031003100	0	0	2	1	2	0	1	0	4	3	4	4	11	3	3	3	2	2	3	1	3	2	1	1	1	2	1	1	2	1	1	1	0	0	0	0	0	1	15	2	3	2	2	2	2	2	15	9	11
10031004011-22503	1	0	7	0	0	0	0	0	0	2	3	3	8	1	1	1	2	1	1	0	1	1	0	0	0	3	1	1	1	1	0	0	0	0	0	0	0	0	8	3	2	1	2	2	1	1	12	3	5
10031005000	0	1	10	1	1	1	1	0	4	4	5	5	14	1	4	1	1	1	1	0	1	1	0	0	0	2	1	1	1	1	0	0	1	0	0	0	0	0	8	4	3	2	1	2	4	1	17	6	4
10031006000	0	0	4	1	6	1	1	1	10	4	4	4	12	4	3	3	3	1	1	0	1	1	0	0	0	2	1	1	1	1	0	1	0	0	0	0	0	1	9	3	4	1	3	3	3	1	18	10	6
10031007000	1	0	4	0	0	0	0	0	0	4	5	5	14	5	5	5	2	3	2	0	1	1	0	0	0	3	3	1	2	1	0	0	1	0	0	0	0	0	12	4	3	4	4	4	3	1	23	15	8
10031008000	1	0	6	1	1	0	1	1	4	3	3	3	9	3	3	3	3	5	1	0	1	1	0	0	0	4	2	1	1	1	0	0	1	0	0	0	0	0	11	4	2	4	3	3	5	1	22	9	10
10031009001-22503	0	0	4	1	6	1	1	1	10	4	3	3	10	5	3	4	3	3	3	0	2	3	1	1	1	3	3	1	1	1	0	1	0	0	0	0	0	0	16	4	3	3	3	5	4	3	25	12	11
10031010010	0	0	2	1	5	1	1	0	8	3	3	3	9	3	2	3	3	2	1	0	1	1	0	1	1	3	1	1	1	1	1	1	1	0	0	0	0	1	14	4	3	1	3	4	4	1	20	8	7
10031011000	0	0	7	1	7	1	1	1	11	3	3	3	9	1	3	1	1	3	1	0	1	1	0	0	0	1	2	1	1	2	0	1	1	0	0	0	0	1	11	6	3	6	1	5	6	1	28	5	6
10031012110	0	0	6	1	5	1	1	0	8	3	3	3	9	4	2	3	1	2	1	0	1	2	0	0	0	2	1	1	1	1	0	0	1	0	0	0	0	0	9	1	1	1	1	2	2	1	9	9	5
10031013000	0	0	4	1	0	1	1	0	3	2	3	3	8	3	1	4	3	3	1	0	1	1	0	0	0	4	2	1	1	1	0	0	0	0	0	0	0	0	10	4	3	1	1	2	1	1	13	8	8
10031014010	0	0	6	1	7	1	1	0	10	1	3	3	7	5	1	1	1	1	1	0	1	1	0	0	0	5	1	1	1	1	0	0	0	0	0	0	0	0	10	5	2	1	1	1	1	1	12	7	4
10031015010	1	1	6	1	3	1	1	0	6	3	3	3	9	3	2	2	1	3	1	0	1	1	0	0	0	3	3	1	1	1	0	0	0	0	0	0	0	1	11	3	2	1	1	2	4	1	14	7	6
10031016010	1	1	3	1	4	1	1	0	7	3	3	3	9	3	3	2	3	3	2	0	1	1	0	0	0	2	2	1	1	1	1	1	0	0	0	0	0	1	11	3	3	4	4	3	1	1	19	8	9
10031017010	1	0	4	0	0	1	1	0	2	1	1	1	3	3	3	3	2	2	1	0	1	1	0	0	0	2	2	1	1	1	0	0	0	0	0	0	0	0	8	4	1	1	1	1	5	1	14	9	6
10031018010	1	1	11	1	7	1	1	1	11	3	3	2	8	4	2	4	2	3	2	0	5	3	0	0	0	3	1	1	5	1	1	1	1	0	0	0	0	1	18	5	4	4	4	3	2	3	25	10	12
10031019000	1	0	5	0	0	0	0	1	1	2	3	3	8	3	4	3	2	4	1	1	3	2	0	0	0	5	3	1	3	1	1	1	1	0	0	0	0	0	18	3	3	2	1	3	3	1	16	10	11
10031020010	1	0	1	1	3	0	1	0	5	3	3	3	9	3	1	1	1	1	1	0	1	1	0	0	0	5	1	1	1	2	0	0	1	0	0	0	0	0	12	3	2	2	2	2	1	1	13	5	4
10031021000	1	1	7	0	0	0	0	0	0	2	2	2	6	3	3	3	3	1	2	1	1	1	0	0	0	1	2	1	1	1	0	1	0	0	0	1	0	0	9	6	3	6	3	3	6	1	28	9	8
10031022010	0	0	4	1	1	0	1	0	3	3	3	3	9	4	3	3	1	1	1	0	1	1	0	0	0	1	1	1	1	1	1	1	1	0	0	0	0	0	9	4	2	2	2	1	1	2	14	10	4
10031023011-22503	0	0	4	1	0	1	0	1	3	3	3	2	8	3	4	4	2	3	2	0	2	3	0	0	0	3	3	1	2	3	0	1	1	0	0	0	0	0	17	4	3	2	2	2	2	2	17	11	9
10031024100	0	0	2	0	3	1	1	0	5	4	4	4	12	2	2	2	2	2	1	0	1	2	0	1	0	2	1	1	2	1	1	1	0	0	0	0	0	0	12	4	4	1	2	2	6	1	20	6	6
10031025000	1	0	3	1	0	1	1	0	3	2	2	2	6	2	2	3	2	3	2	0	1	2	0	1	0	5	1	1	1	5	0	0	0	0	0	0	0	0	16	5	3	1	5	4	5	5	28	7	8
10031026011-22503	0	1	2	0	0	1	0	0	1	1	4	4	9	3	5	4	3	1	1	0	1	1	0	1	0	1	1	1	1	1	1	1	0	0	0	0	0	0	9	3	3	1	2	1	2	1	13	12	6
10031027010-22503	1	0	2	1	2	0	0	0	3	3	3	3	9	3	3	3	3	3	3	1	3	3	0	0	0	5	2	1	1	5	0	0	1	0	0	0	0	1	19	1	2	5	6	2	3	2	21	9	13
10031028010	1	0	11	1	6	1	1	0	9	4	4	3	11	3	4	3	2	2	1	1	1	1	0	0	0	3	1	1	1	2	0	0	0	0	0	0	0	1	10	4	2	1	2	3	1	1	14	10	7
10031029010	0	0	1	1	0	1	1	0	3	3	4	3	10	4	3	4	3	1	1	0	1	1	0	0	0	5	1	1	1	1	1	1	1	0	0	0	0	1	14	3	2	1	2	2	3	1	14	11	6
10031030000	1	0	7	0	0	0	0	0	0	4	5	5	14	4	3	5	3	3	1	1	2	2	0	1	0	2	1	1	1	1	1	1	1	0	0	0	0	0	12	6	4	6	6	6	4	6	38	12	10
10031031010	0	0	4	1	2	1	1	0	5	4	5	4	13	4	3	4	3	5	1	0	1	1	1	0	0	2	2	1	1	3	1	1	0	0	0	0	1	0	14	5	3	3	3	4	4	3	25	11	10
10031032000	1	0	8	1	1	0	0	0	2	3	3	3	9	3	3	3	3	3	3	1	3	3	1	1	1	3	3	4	3	3	0	1	1	0	0	0	0	0	24	3	3	5	5	5	6	5	32	9	13
10031033000	1	0	20	0	3	1	0	0	4	3	3	3	9	3	3	3	1	1	1	0	1	1	0	0	0	4	3	1	1	3	1	1	1	0	0	1	1	1	19	3	2	1	1	2	1	1	11	9	4
10031034000	0	0	5	1	1	0	0	0	2	2	3	2	7	1	3	1	1	2	3	1	3	3	1	0	0	2	3	3	2	5	0	0	1	0	0	0	0	0	20	3	2	2	5	5	4	5	26	5	10
10031035000	0	0	2	1	1	0	0	0	2	5	5	5	15	4	4	4	1	4	1	0	1	1	0	1	0	4	1	1	1	1	0	0	1	0	0	0	0	1	12	5	3	1	2	2	3	1	17	12	7
10031036110	0	0	16	1	1	0	1	0	3	3	4	3	10	5	3	5	1	1	1	0	1	1	0	0	1	3	1	1	1	1	0	1	0	0	0	0	0	0	10	6	4	6	5	5	1	5	32	13	4
10031037010	1	0	2	0	1	0	0	0	1	3	3	3	9	4	4	3	2	1	1	0	1	2	0	0	0	3	3	1	1	1	0	0	1	0	0	0	0	0	12	2	1	3	2	3	1	1	13	11	5
10031038110	1	0	2	1	2	1	1	0	5	3	3	3	9	4	4	5	3	1	1	0	1	1	0	0	0	3	3	1	1	1	0	0	0	0	0	0	0	0	10	2	2	1	2	2	3	1	13	13	6
10031039000	0	0	2	0	2	0	1	0	3	5	5	5	15	5	3	5	3	2	2	0	1	2	0	0	0	5	2	1	1	1	0	1	1	0	0	0	0	0	14	6	3	2	4	6	2	1	24	13	8
10031040100	1	0	3	0	1	0	1	0	2	3	3	3	9	3	3	3	1	1	1	0	1	1	0	0	0	1	1	1	1	1	0	0	0	0	0	0	0	0	6	2	2	2	2	1	4	1	14	9	4
10031041010	1	0	3	0	2	0	1	1	4	3	3	3	9	3	1	2	3	3	1	0	1	1	1	0	0	3	3	1	1	1	0	1	0	0	0	0	0	1	13	6	2	1	6	6	2	1	24	6	8
10031042010	0	0	6	1	4	1	1	0	7	1	1	1	3	5	1	1	1	1	1	1	1	1	0	0	1	5	5	1	1	1	0	0	1	0	0	0	0	0	16	1	2	6	1	3	1	1	15	7	5
10031043010	1	1	3	1	1	1	1	1	5	2	3	2	7	3	1	2	2	1	1	0	1	1	0	0	0	2	1	1	1	1	0	0	1	0	0	0	0	0	8	3	2	2	1	3	2	1	14	6	5
10031044000	0	0	5	1	5	0	0	0	6	3	3	4	10	4	4	4	3	3	3	0	3	3	1	0	0	1	1	1	1	1	1	1	1	0	0	0	0	1	13	4	3	1	3	1	4	1	17	12	12
10031045010	1	0	5	1	2	1	1	1	6	3	3	3	9	1	1	1	1	1	1	0	1	1	0	1	0	5	3	1	1	1	1	1	0	0	0	0	1	1	17	3	1	1	1	4	1	1	12	3	4
10031046000	0	0	1	0	0	1	0	0	1	1	1	1	3	3	3	4	3	1	1	0	1	1	0	0	0	5	1	1	1	1	0	1	0	0	0	0	1	0	12	2	2	1	1	1	2	1	10	10	6
10031047110	1	1	5	1	7	1	1	1	11	3	3	3	9	3	2	2	1	1	1	0	1	2	0	0	0	1	1	1	1	2	0	1	0	0	0	0	0	1	10	2	2	2	2	2	2	3	15	7	4
10031048010	0	0	4	1	0	0	0	0	1	1	3	2	6	2	1	2	1	1	1	0	1	1	0	0	0	3	3	1	1	1	0	0	1	0	0	0	0	1	12	4	2	1	1	1	1	1	11	5	4
10031049010	0	0	10	1	4	0	0	0	5	2	2	2	6	2	3	3	2	2	1	0	1	1	0	0	0	5	2	1	1	1	0	0	1	0	0	0	0	0	12	3	2	2	1	2	1	1	12	8	6
10031050000	0	1	1	1	4	1	1	0	7	3	3	4	10	4	3	3	1	3	1	0	1	1	0	0	0	5	2	1	1	4	0	1	1	0	0	0	0	0	16	4	2	2	2	1	4	1	16	10	6
10031051000	1	1	2	0	4	1	1	1	7	3	2	2	7	2	2	1	2	2	1	0	5	1	0	0	0	1	1	1	1	2	0	0	0	0	0	0	0	1	8	5	4	4	5	2	3	1	24	5	10
10031052000	0	0	13	1	7	1	1	1	11	1	3	2	6	1	3	1	2	2	1	0	2	1	0	0	1	5	4	1	1	1	0	0	0	0	0	0	0	1	15	6	2	1	2	3	1	1	16	5	7
10031053000	1	1	1	0	1	0	1	1	3	5	5	5	15	3	3	3	1	2	1	0	1	1	0	0	0	5	5	1	1	1	0	0	1	0	0	0	0	0	15	6	2	4	2	3	3	1	21	9	5
10031054100	1	0	3	1	0	1	0	0	2	1	2	3	6	4	2	2	3	3	1	0	1	1	0	0	0	5	1	1	1	1	0	1	1	0	0	0	0	1	13	4	2	2	3	3	2	1	17	8	8
10031055000	0	0	3	1	5	0	1	0	7	3	3	3	9	3	3	3	3	5	2	0	2	2	0	1	0	3	1	1	1	3	0	1	1	0	0	0	0	1	15	6	3	2	3	2	3	2	21	9	12
10031056010	1	0	15	0	2	1	1	0	4	2	3	3	8	3	3	4	2	2	1	0	4	1	1	0	0	2	2	1	2	5	0	1	1	0	0	0	0	0	16	6	3	5	3	2	6	2	27	10	9
10031057010	0	0	3	1	0	1	0	1	3	3	3	3	9	4	2	3	3	3	2	0	2	3	0	0	0	2	2	1	1	2	0	0	1	0	0	0	0	0	12	3	2	1	2	2	2	1	13	9	10
10031058000	1	0	6	1	0	0	1	0	2	3	3	3	9	4	4	4	1	3	2	1	3	3	1	0	0	3	2	2	3	3	0	0	1	0	0	0	0	1	19	6	4	6	6	6	1	6	35	12	10
10031059010	1	0	4	1	1	0	1	0	3	3	3	3	9	3	2	3	1	1	1	0	1	1	0	0	0	1	1	1	1	5	0	1	0	0	0	0	0	0	11	4	2	2	1	2	1	1	13	8	4
10031060002-20605-22503	0	1	5	1	7	1	1	1	11	5	5	4	14	4	4	4	1	1	1	0	5	1	0	0	0	5	1	1	1	5	1	1	1	0	0	0	1	0	18	6	4	1	6	2	1	3	23	12	8
10031061001-22503	0	0	7	1	0	0	1	0	2	3	3	3	9	2	1	3	3	3	3	1	3	3	1	1	0	1	5	1	3	3	0	0	1	0	0	0	0	1	20	4	3	3	3	1	5	5	24	6	13
10031062010	0	0	6	1	1	1	1	0	4	4	4	2	10	2	2	2	1	1	1	0	1	1	0	0	0	1	1	1	1	1	0	0	1	0	0	0	0	1	8	3	3	1	1	3	2	1	14	6	4
10031063001-10007	0	0	7	1	1	0	0	0	2	2	3	3	8	3	3	4	2	2	1	0	1	2	1	0	0	3	2	1	1	2	0	1	0	0	0	0	1	1	15	3	2	1	2	2	3	1	14	10	6
10031064000	0	0	4	1	1	1	0	0	3	4	4	3	11	3	3	5	1	1	1	0	2	1	0	0	0	3	1	1	1	1	0	1	0	0	0	0	0	1	10	5	2	1	1	2	1	1	13	11	5
10031065010	0	0	3	1	5	1	1	0	8	3	3	3	9	3	3	3	1	1	1	0	1	2	0	1	1	3	1	1	1	1	0	0	0	0	0	1	0	0	12	4	2	1	4	1	1	1	14	9	4
10031066001-22503	1	0	15	1	2	0	0	1	4	5	5	5	15	4	5	4	3	3	4	0	3	2	0	0	1	2	3	2	3	2	1	1	0	0	0	0	0	0	17	6	3	4	6	2	6	1	28	13	13
10031067000	0	0	3	1	0	1	1	0	3	3	3	3	9	3	3	4	3	1	2	0	1	2	0	0	0	3	4	1	1	1	0	1	0	0	0	0	0	1	14	4	3	1	1	2	4	1	16	10	7
10031068001-22704	0	0	2	1	1	0	0	0	2	3	3	3	9	3	3	3	4	3	3	0.614197	3	2	1	1	1	3	3	3	3	2	0	0	0	0	0	0	0	0	19	2	2	2	2	2	2	2	14	9	13.6142
10031069011-20804	0	0	9	1	7	1	1	0	10	1	2	2	5	2	1	2	2	1	1	0	1	1	0	0	0	1	3	1	1	2	0	1	0	0	0	0	0	0	10	5	3	2	2	1	3	1	17	5	5
10031070001-22503	0	0	12	1	2	1	1	0	5	3	3	2	8	3	3	4	1	2	2	0	1	3	1	1	0	2	1	1	1	1	0	1	1	0	0	1	0	1	15	6	5	1	1	2	1	1	17	10	6
10031071000	0	0	20	1	4	1	1	0	7	5	5	5	15	5	3	3	2	5	1	0	1	1	0	0	1	3	1	1	1	1	0	1	0	0	0	0	0	0	10	6	4	4	4	3	5	1	27	11	9
10031072111-10007	1	0	6	1	6	1	1	0	9	3	3	3	9	3	3	3	3	3	3	0	3	3	0	0	0	1	1	1	1	1	0	1	0	0	0	0	0	1	10	2	3	2	2	5	2	2	18	9	12
10031073000	1	0	1	0	0	0	0	0	0	1	1	1	3	1	1	1	1	1	1	0	1	1	0	0	0	2	1	1	1	1	0	0	0	0	0	0	0	0	7	2	2	1	1	2	1	2	11	3	4
10031074000	0	0	6	1	0	0	0	0	1	3	4	3	10	3	2	4	2	3	1	0	1	1	0	0	0	3	1	1	1	1	0	1	1	0	0	0	0	0	10	5	2	2	1	3	2	1	16	9	7
10031075011-10009	1	0	#NULL!	0	0	0	1	0	1	3	3	3	9	1	4	4	2	2	1	0	1	1	0	0	0	2	1	1	1	1	0	0	0	0	0	0	0	0	7	2	2	1	2	2	2	2	13	9	6
10031076000	1	1	7	0	2	0	1	0	3	2	2	2	6	2	1	2	3	2	2	0	2	2	0	0	0	2	2	1	1	3	0	1	0	0	0	0	0	0	12	3	3	3	3	2	2	2	18	5	9
10031077001-20101	0	1	13	1	2	1	1	0	5	2	2	2	6	4	1	2	3	2	2	0	3	2	0	0	0	1	1	1	1	1	0	0	0	0	0	0	0	0	7	4	4	2	2	2	3	1	18	7	10
10031078000	0	0	4	1	2	1	1	1	6	3	4	3	10	2	4	3	2	2	1	0	1	2	0	0	0	2	1	1	1	2	0	1	0	0	0	0	0	0	10	3	2	1	1	2	3	1	13	9	6
10031079000	1	0	6	0	1	1	1	0	3	3	4	4	11	3	4	4	3	3	2	1	3	3	1	1	1	4	1	1	2	1	1	1	1	0	0	0	0	1	19	3	4	2	2	2	4	2	19	11	12
10031080001-22503	1	1	4	0	2	0	0	0	2	3	4	4	11	4	1	3	2	3	2	0	2	1	0	0	1	3	1	1	1	1	0	0	1	0	0	0	0	0	10	4	2	3	3	3	1	3	19	8	9
10031081000	0	1	11	1	0	1	1	0	3	2	3	3	8	4	2	3	3	1	1	0	1	1	0	0	0	1	1	1	1	1	0	0	1	0	0	0	0	0	7	6	3	3	5	2	1	3	23	9	6
10031082000	0	0	6	1	7	1	1	1	11	4	4	3	11	3	1	3	2	1	1	0	1	1	0	0	0	1	1	1	1	1	0	0	0	0	0	0	0	0	6	5	2	2	3	3	1	1	17	7	5
10031083011-10009	1	1	#NULL!	0	0	0	0	0	0	3	3	2	8	3	2	1	2	3	1	0	1	1	0	1	0	2	3	1	1	1	1	0	1	0	0	0	1	0	13	3	2	1	2	2	3	1	14	6	7
10031084112-10007-22503	0	0	2	1	7	1	1	0	10	3	4	3	10	4	4	5	2	3	1	0	1	2	0	1	0	5	2	1	1	1	0	1	1	0	0	0	0	1	16	6	3	1	3	3	6	1	23	13	7
10031085000	1	1	1	1	0	1	1	0	3	4	4	4	12	4	3	4	2	1	1	0	2	1	1	0	1	4	1	1	1	1	0	0	1	0	0	0	0	1	13	6	3	2	4	3	2	1	21	11	6
10031086010	1	0	1	0	0	1	1	0	2	1	2	2	5	3	1	4	1	1	1	0	1	1	0	0	0	3	1	1	1	1	0	0	0	0	0	0	0	0	8	2	1	1	1	2	2	1	10	8	4
10031087001-22401	0	1	6	1	7	1	1	1	11	5	5	4	14	4	3	4	2	4	1	0	2	1	0	0	0	4	1	1	1	3	1	1	1	1	0	0	0	0	15	6	3	4	3	4	2	1	23	11	9
10031088010	1	1	13	1	2	1	1	0	5	3	3	3	9	3	2	4	2	3	1	0	2	1	0	0	0	2	2	1	1	1	0	1	1	1	0	0	0	1	12	4	3	2	2	2	1	1	15	9	8
10031089000	1	1	4	0	1	0	1	1	3	3	3	2	8	2	1	2	1	1	1	0	1	1	1	0	0	2	1	1	1	1	0	0	1	0	0	0	0	0	9	3	2	1	1	2	2	1	12	5	4
10031090000	0	0	2	1	0	1	1	1	4	3	4	5	12	3	2	3	3	3	2	0	3	3	0	0	1	3	3	1	1	1	0	1	1	0	0	0	0	1	16	6	3	1	2	3	1	1	17	8	11
10040001000	1	0	3	1	3	1	1	1	7	1	1	2	4	1	3	3	2	1	1	0	1	1	0	0	1	2	2	1	1	1	0	1	1	0	0	0	0	0	11	2	1	1	1	1	3	1	10	7	5
10040002010	1	0	6	1	1	1	0	0	3	2	1	1	4	1	2	4	1	2	1	0	1	1	0	0	0	1	1	1	1	1	0	0	1	0	0	0	0	0	7	2	1	3	2	1	1	2	12	7	5
10040003000	0	0	6	1	2	1	0	0	4	3	2	2	7	1	2	3	2	3	2	0	1	1	0	0	0	2	2	1	3	1	0	0	1	0	0	0	0	0	11	3	3	5	5	3	2	2	23	6	8
10040005000	1	0	16	1	2	1	1	1	6	4	4	4	12	4	4	4	3	1	1	0	1	1	0	0	0	2	2	1	1	1	0	1	0	0	0	0	0	0	9	4	4	2	2	2	6	1	21	12	6
10040006000	1	0	11	0	2	0	1	0	3	2	1	2	5	2	4	2	2	4	2	0	3	2	0	0	0	3	4	1	1	1	0	0	0	0	0	0	0	1	13	3	2	2	2	2	2	2	15	8	11
10040009000	1	0	3	0	2	1	1	0	4	2	2	2	6	4	1	3	2	2	1	0	1	1	0	1	1	3	1	1	1	1	0	1	1	0	0	0	0	0	12	3	3	2	3	5	1	2	19	8	6
10040011000	0	0	2	1	6	1	1	1	10	3	3	4	10	2	4	3	1	1	1	0	1	1	0	0	0	3	2	1	1	1	0	1	0	0	0	0	0	0	10	6	4	1	1	2	2	1	17	9	4
10040013000	1	0	5	1	1	0	1	0	3	2	3	3	8	1	2	2	3	1	1	0	1	1	0	0	0	3	1	1	1	1	0	1	1	0	0	0	0	0	10	3	3	2	3	2	1	1	15	5	6
10040015010	0	0	3	0	4	1	1	0	6	4	4	4	12	3	3	1	1	1	1	0	1	1	0	0	0	3	2	1	1	1	1	1	1	0	0	0	0	1	13	4	2	1	1	1	1	1	11	7	4
10040017000	1	1	7	0	7	1	1	1	10	5	5	5	15	5	4	5	4	5	1	0	5	2	0	1	0	5	1	1	5	3	1	0	1	0	1	0	0	1	22	6	3	1	6	6	6	5	33	14	15
10040018000	1	1	6	1	2	1	0	0	4	2	4	2	8	4	2	4	3	2	2	0	1	1	0	0	0	2	1	1	1	1	0	0	1	0	0	0	0	0	8	2	3	1	1	2	1	1	11	10	8
10040019000	1	1	7	1	2	1	0	0	4	3	2	4	9	2	1	2	2	3	1	0	1	1	0	0	0	3	1	1	1	1	0	1	1	0	0	1	0	1	12	3	2	1	3	4	1	1	15	5	7
10040020010	1	1	5	0	2	0	1	1	4	2	1	3	6	2	5	5	3	2	1	1	2	2	0	0	0	2	3	2	2	1	0	0	1	0	0	0	0	0	13	4	2	5	3	3	4	3	24	12	9
10040021000	1	1	2	0	1	0	0	0	1	2	3	3	8	4	3	3	3	2	1	0	1	2	0	0	0	2	2	1	1	1	0	0	0	0	0	0	0	0	9	4	4	1	2	2	4	2	19	10	7
10040023100	0	0	1	1	2	1	1	1	6	3	3	3	9	3	3	3	1	1	1	0	1	1	0	0	0	1	1	1	1	1	0	1	0	0	0	0	0	0	7	4	3	2	2	2	2	2	17	9	4
10040024000	0	0	1	1	3	0	0	0	4	3	4	4	11	3	1	2	2	3	2	0	1	1	0	0	0	3	1	1	1	1	0	1	0	0	0	0	0	0	9	3	2	2	3	3	3	2	18	6	8
10040025010	0	0	5	1	2	1	1	0	5	3	3	3	9	2	1	1	1	1	1	0	2	2	0	0	0	1	2	1	1	1	0	1	0	0	0	0	0	0	9	6	2	1	1	1	1	1	13	4	5
10040026010	0	0	6	1	0	1	1	0	3	2	2	3	7	3	1	4	1	1	1	0	1	1	0	0	0	1	1	1	1	1	0	1	0	0	0	0	0	0	7	4	1	1	1	1	1	1	10	8	4
10040028010	1	0	6	1	4	0	0	0	5	3	3	3	9	3	2	3	2	2	1	0	1	1	0	0	0	3	1	1	1	1	0	0	0	0	0	0	0	0	8	6	2	1	1	2	3	1	16	8	6
10040031100	0	0	3	1	0	1	1	1	4	3	4	4	11	2	4	2	1	2	1	0	1	1	0	0	0	3	2	1	1	5	0	0	1	0	0	0	0	0	14	4	5	3	3	3	5	1	24	8	5
10040033000	1	0	1	1	2	1	1	0	5	3	1	3	7	1	3	3	4	4	2	0	5	3	0	0	0	5	4	1	1	1	0	0	1	0	0	0	0	0	16	4	2	1	2	2	6	1	18	7	15
10040034000	0	0	2	0	3	0	1	0	4	3	2	2	7	2	3	3	3	5	3	0	2	2	0	0	0	5	2	1	1	1	0	0	1	0	0	0	0	0	13	3	2	2	2	3	4	1	17	8	13
10040004001-22503	0	0	2	1	1	1	1	0	4	4	3	3	10	3	3	3	2	2	1	0	1	2	0	1	1	2	1	1	1	1	0	0	0	0	0	0	0	0	10	5	2	2	2	2	3	1	17	9	6
10040007001-22503	0	0	20	1	2	1	0	0	4	3	3	2	8	2	3	1	2	3	1	0	1	1	0	0	0	1	3	1	1	1	0	1	1	0	0	0	0	0	10	4	3	1	2	2	2	1	15	6	7
10040008002-22504-22505	0	0	7	1	0	0	1	0	2	1	5	3	9	2	1	4	1	1	1	0	1	1	0	1	1	5	2	1	1	2	0	0	0	0	0	0	0	0	14	4	2	1	1	5	1	1	15	7	4
10040010001-22503	0	0	7	1	4	1	1	0	7	3	3	3	9	4	4	3	3	2	1	0	1	2	0	1	0	2	2	2	2	3	1	1	1	0	0	0	0	1	18	5	4	2	2	1	3	2	19	11	7
10040012011-22503	1	1	2	1	2	0	0	0	3	1	1	1	3	3	3	3	2	1	1	0	1	1	0	0	0	3	2	1	1	1	0	0	1	0	0	0	0	0	10	2	1	1	1	2	2	1	10	9	5
10040014011-22503	1	1	3	1	2	1	1	0	5	3	3	2	8	3	4	3	3	1	1	0	1	1	0	0	0	1	1	1	1	2	0	1	0	0	0	0	0	0	8	6	3	2	3	1	5	1	21	10	6
10040016001-22503	1	1	2	0	2	1	0	0	3	3	4	3	10	3	4	5	2	1	1	0	1	1	0	0	0	1	1	1	1	1	0	0	0	0	0	0	0	0	6	6	4	2	3	3	3	3	24	12	5
10040022002-10002-22503	1	#NULL!	16	1	1	1	1	0	4	3	3	3	9	1	5	1	1	3	1	0	1	1	0	0	0	2	1	1	1	5	0	1	1	0	0	0	0	0	13	3	3	1	1	2	1	1	12	7	6
10040027001-10007	0	0	6	1	0	0	1	1	3	3	3	3	9	3	4	5	2	1	1	0	1	2	0	0	0	3	1	1	1	4	0	1	0	0	0	0	1	1	15	6	3	4	2	2	6	2	25	12	5
10040029010-22503	1	1	3	1	1	1	1	1	5	2	2	2	6	2	2	2	3	3	2	0	2	2	0	0	0	4	4	1	1	1	0	1	1	0	0	1	0	0	16	2	3	2	2	3	2	3	17	6	10
10040030011-22503	0	0	6	1	2	1	1	0	5	3	3	2	8	4	3	4	1	1	1	0	1	2	0	0	0	1	1	1	1	1	0	1	1	0	0	0	0	0	9	4	3	6	4	3	1	6	27	11	4
10040032001-22503	0	0	7	1	2	0	1	0	4	4	4	3	11	4	3	3	3	2	1	0	1	1	0	0	0	2	2	1	1	1	0	0	0	0	0	0	0	1	9	2	3	2	2	2	2	2	15	10	7
10040035011-22503	1	1	9	0	0	1	1	1	3	3	3	3	9	2	1	1	1	1	1	0	1	1	0	0	0	3	2	1	1	1	0	0	1	0	0	0	0	0	10	4	2	1	1	1	3	1	13	4	4
10053004010	0	0	6	1	6	1	0	1	9	5	5	5	15	5	1	3	2	5	1	0	1	1	0	1	0	3	1	1	1	5	0	1	1	0	0	0	0	1	16	6	5	1	6	3	1	1	23	9	9
10053005000	0	0	1	0	0	0	0	0	0	3	3	3	9	1	1	1	1	1	1	0	1	1	0	0	0	1	1	1	1	5	0	0	0	0	0	0	0	0	10	5	2	1	2	1	2	1	14	3	4
10053006000	0	0	7	1	7	1	1	0	10	1	1	2	4	3	1	1	2	2	1	0	1	2	0	1	0	1	1	1	1	2	0	0	0	0	0	0	0	1	10	4	2	2	3	2	3	1	17	5	6
10053007110	0	0	7	1	2	0	1	0	4	1	3	3	7	3	2	2	1	1	1	0.0134911	1	1	0	0	0	1	1	1	1	1	0	0	0	0	0	0	0	0	6	1	1	1	1	1	2	1	8	7	4.01349
10053009000	0	1	4	1	7	1	1	0	10	3	3	3	9	4	3	4	3	2	3	0	1	2	0	1	0	2	2	1	1	2	1	1	1	0	0	0	1	1	16	4	3	3	3	3	3	3	22	11	9
10053012000	0	0	10	0	0	0	0	0	0	1	1	1	3	1	1	1	1	5	1	0	1	1	0	0	1	1	1	1	1	1	0	1	0	0	0	0	0	1	9	2	1	1	1	1	1	1	8	3	8
10053013110	0	0	2	1	2	0	1	0	4	3	4	3	10	1	3	4	3	3	2	1	2	2	0	0	1	5	1	1	1	1	0	1	1	0	0	0	0	1	15	2	2	5	5	3	2	5	24	8	11
10053014000	0	1	12	0	1	1	0	0	2	3	3	3	9	4	4	3	3	1	3	0	1	1	0	0	0	1	1	1	1	1	0	0	0	0	0	0	0	0	6	6	3	6	3	3	1	4	26	11	8
10053015010	0	1	15	1	0	0	1	1	3	2	2	3	7	3	3	3	1	1	1	0	1	1	0	0	1	1	1	1	1	2	0	0	0	0	0	0	0	0	8	4	2	1	1	1	1	1	11	9	4
10053016010	0	1	4	1	7	1	1	0	10	3	3	2	8	3	4	3	2	1	1	0	1	1	0	0	1	2	2	1	1	2	0	0	0	0	0	0	0	1	11	5	3	3	2	1	2	1	17	10	5
10053017000	0	0	9	0	0	0	0	0	0	2	4	4	10	3	3	3	1	2	1	0	2	1	0	1	0	2	2	1	1	1	0	1	1	0	0	0	0	1	12	4	3	4	1	1	1	1	15	9	6
10053018000	0	0	3	0	2	1	0	0	3	2	3	2	7	3	4	4	2	2	1	0	1	1	0	1	0	2	1	1	1	2	0	0	0	0	0	0	0	1	10	5	3	1	1	1	2	1	14	11	6
10053019000	0	0	3	1	2	1	1	0	5	3	4	3	10	2	1	2	2	1	1	0	1	1	0	1	0	1	1	1	1	2	1	1	1	0	0	0	0	0	11	4	2	1	2	2	2	2	15	5	5
10053021010	0	0	6	0	6	1	1	0	8	3	3	2	8	4	3	1	1	1	1	0	1	1	0	0	0	1	1	1	1	1	0	1	1	0	0	0	0	1	9	6	3	1	1	1	2	1	15	8	4
10053025000	0	1	3	1	7	1	1	1	11	5	5	5	15	4	3	3	2	3	1	0	3	2	0	1	1	3	2	1	1	1	1	1	0	0	0	0	1	1	16	6	4	3	3	3	3	2	24	10	9
10053026000	0	1	2	1	1	1	1	0	4	5	4	5	14	5	3	5	2	1	1	0	2	1	0	0	0	1	1	1	1	1	0	1	0	0	0	0	0	0	7	6	3	4	2	2	2	1	20	13	6
10053028010	0	0	3	1	5	1	1	0	8	2	2	3	7	3	2	2	1	1	1	0	1	1	0	0	0	1	1	1	1	1	0	0	0	0	0	0	0	0	6	3	2	2	1	1	1	1	11	7	4
10053031010	0	1	5	0	2	0	0	0	2	3	3	2	8	3	3	1	3	2	2	0	1	2	0	0	0	1	1	1	1	1	0	1	1	0	0	0	1	0	10	4	2	3	2	3	3	2	19	7	8
10053032010	0	1	7	1	7	1	1	1	11	3	3	3	9	3	4	3	2	1	2	0	1	1	0	0	1	5	1	1	1	1	0	0	1	0	0	0	0	1	13	5	3	1	2	2	6	1	20	10	6
10053033010	0	0	12	0	6	1	1	1	9	4	4	4	12	3	4	3	1	1	1	0	1	3	0	1	0	1	1	1	1	1	0	0	0	0	0	0	0	0	9	5	4	3	3	1	5	2	23	10	4
10053034010	0	0	13	1	0	1	0	1	3	3	3	3	9	4	4	3	1	1	1	0	1	1	0	0	0	1	1	1	1	1	0	0	0	0	0	0	0	0	6	6	2	2	1	1	2	1	15	11	4
10053039000	0	0	7	1	0	1	0	1	3	5	5	5	15	3	3	3	1	3	1	0	1	1	0	0	1	1	1	1	1	1	0	0	1	0	0	0	0	0	8	6	4	2	2	2	3	2	21	9	6
10053044000	0	0	2	0	0	1	0	0	1	2	3	2	7	2	1	2	2	1	2	0	1	1	0	0	1	1	1	1	1	1	0	1	0	0	0	0	0	1	9	4	2	1	2	1	2	1	13	5	6
10053045000	0	0	1	1	0	1	0	0	2	3	3	4	10	5	1	4	1	1	1	0	1	1	0	0	0	1	1	1	1	1	0	0	0	0	0	0	0	0	6	5	2	1	1	1	2	1	13	10	4
10053046000	0	0	3	1	7	1	1	1	11	3	4	4	11	4	1	1	2	1	1	0	1	1	0	1	1	1	1	1	1	1	1	1	0	0	0	0	0	0	10	3	2	1	2	2	2	1	13	6	5
10053047010	0	0	#NULL!	1	0	1	0	0	2	1	2	3	6	4	1	2	1	1	1	0	1	1	0	1	0	1	1	1	1	1	0	1	1	0	0	0	0	1	10	6	3	1	3	1	2	1	17	7	4
10053048000	0	0	5	0	0	0	0	0	0	4	3	3	10	4	5	5	2	1	1	0	3	1	0	0	0	1	1	1	1	3	0	1	1	0	0	0	0	1	11	5	3	1	2	1	2	1	15	14	7
10053001001-10009	0	0	#NULL!	1	0	0	1	0	2	1	2	2	5	4	2	2	2	2	1	0	1	1	0	1	1	1	1	1	1	1	0	1	0	0	0	1	0	1	11	3	2	1	1	1	3	1	12	8	6
10053002001-21606	0	0	3	1	2	1	1	0	5	2	3	2	7	3	4	3	2	1	1	0	1	2	0	0	1	2	1	1	1	1	0	1	1	0	0	0	0	0	11	4	3	1	2	1	1	1	13	10	5
10053003001-22203	0	0	2	1	0	1	1	1	4	3	4	3	10	3	1	5	2	2	1	0	2	2	0	1	0	1	2	1	1	2	0	1	1	0	0	0	0	1	13	3	2	3	3	3	5	1	20	9	7
10053008001-21606	0	0	7	0	0	1	0	0	1	3	5	3	11	5	1	1	1	1	1	0	1	1	0	0	1	3	1	1	1	1	0	1	0	0	0	0	0	0	10	2	1	1	2	1	2	1	10	7	4
10053010001-22506	0	0	6	1	0	1	1	0	3	4	4	3	11	3	3	3	2	1	1	0	1	1	0	0	0	1	1	1	1	1	0	1	1	0	0	0	0	0	8	4	3	1	1	1	1	1	12	9	5
10053011111-22503	0	0	12	0	0	0	0	0	0	2	2	2	6	3	4	4	1	1	1	1	2	1	1	1	1	1	2	1	2	5	1	1	1	0	0	0	0	1	19	6	2	1	1	1	3	1	15	11	6
10053020106-10002-21203-21501-21702-22101-22306	0	#NULL!	1	1	0	1	1	0	3	3	3	3	9	3	2	3	1	2	4	1	2	2	1	0	1	2	4	3	2	3	1	1	1	0	0	0	1	0	22	1	2	1	3.56122	6	2	6	21.5612	8	10
10053022003-10007-21604-22503	0	0	1	0	1	0	1	0	2	3	3	3	9	3	3	2	1	5	1	0	1	1	0	0	0	2	1	1	1	1	0	0	1	0	0	0	0	1	9	2	2	1	1	1	2	1	10	8	8
10053023011-21806	0	0	3	1	0	1	0	0	2	1	3	3	7	4	2	1	3	1	1	0	1	1	0	0	0	1	1	2	1	1	0	0	0	0	0	0	0	0	7	6	3	1	1	1	1	1	14	7	6
10053024001-22503	0	1	5	1	7	1	1	1	11	3	4	4	11	4	2	2	2	2	3	0	2	2	0	1	0	2	2	1	2	1	0	1	1	0	0	0	0	1	14	6	4	3	2	2	6	2	25	8	9
10053027001-22503	0	0	4	1	0	1	1	1	4	3	3	3	9	5	2	5	1	3	4	0	3	3	0	0	0	3	3	3	3	3	0	0	1	0	0	0	0	0	19	3	4	3	3	3	3	3	22	12	11
10053029012-20605-22503	0	0	20	1	0	1	1	0	3	2	3	2	7	1	3	4	2	1	2	0	1	1	0	0	0	1	1	1	1	4	0	0	0	0	0	0	0	0	9	6	3	3	2	1	1	2	18	8	6
10053030001-22503	0	0	2	1	7	1	1	1	11	3	4	3	10	4	3	3	3	1	1	0	1	2	0	0	0	1	2	1	1	5	0	0	1	0	0	0	0	0	13	6	4	1	4	2	4	1	22	10	6
10053035001-22503	0	0	11	1	2	1	1	0	5	3	3	3	9	4	4	5	2	1	1	0	1	1	0	1	1	1	1	1	1	1	0	0	1	0	0	0	0	0	9	6	3	3	2	3	2	1	20	13	5
10053036117-20402-20403-21606-22201-22202-22203-22301	0	0	13	0	0	1	1	0	2	1	1	1	3	4	2.80823	2.51901	1	1	1	0	1	1	0	1	0	1	1	1	1	1	0	0	0	0	0	0	0	0	7	5	3	1	1	1	1	1	13	9.32724	4
10053037001-22503	0	0	5	1	7	1	0	0	9	3	4	3	10	3	2	1	1	1	1	0	1	1	0	1	0	1	1	1	1	1	0	0	0	0	0	0	0	0	7	6	3	1	3	1	2	1	17	6	4
10053038111-21606	0	0	2	1	0	1	1	0	3	4	4	4	12	4	4	4	1	1	1	0	1	1	0	0	0	1	1	1	1	1	0	0	0	0	0	0	0	0	6	4	3	1	2	2	4	1	17	12	4
10053040001-22701	0	0	5	1	7	1	1	0	10	2	3	3	8	4	3	2	2.14523	3	1	0	1	2	0	0	0	2	1	1	1	1	0	0	0	0	0	0	0	0	8	5	4	1	3	4	2	1	20	9	7.14523
10053041004-10009-21606-21901-22503	0	0	#NULL!	1	0	1	1	0	3	4	4	3	11	5	1	5	4	4	2	0	3	1	0	0	0	3	4	1	1	1	1	1	1	0	0	0	0	0	14	6	4	1	1	3	1	1	17	11	13
10053042001-22503	0	0	6	1	5	1	1	1	9	3	2	2	7	1	1	2	1	5	1	0	1	2	0	1	1	3	1	1	1	3	0	1	1	0	0	0	0	1	16	6	3	2	2	4	6	1	24	4	8
10053043005-10009-22308-22309-22503-22602	0	0	#NULL!	1	0	0	0	1	2	2	2	2	6	2	2	2	4	3	4	1	4	4	1	0	0	1	1	1	1	1	0	0	0	0	0	0	0	0	10	3	3	6	3	2.69856	2	3	22.6986	6	16
20060002000	1	0	#NULL!	1	2	0	1	0	4	3	3	5	11	4	3	4	1	1	1	0	1	2	0	0	0	1	1	1	1	1	0	1	1	0	0	0	0	0	9	4	2	2	3	1	2	2	16	11	4
20060004000	0	0	3	1	4	0	1	0	6	3	3	3	9	3	2	3	2	2	2	0	1	2	0	0	0	1	1	1	1	1	0	0	0	0	0	0	0	0	7	4	3	2	2	1	2	1	15	8	7
20060005000	1	0	3	1	1	0	1	0	3	2	2	2	6	2	2	3	2	2	2	0	3	2	0	0	0	2	2	1	1	2	0	0	1	0	0	0	0	1	12	2	2	2	3	2	2	2	15	7	9
20060007010	1	1	3	1	0	1	1	0	3	3	4	5	12	5	5	5	1	1	2	0	1	1	0	0	0	2	2	1	1	1	0	0	0	0	0	0	0	0	8	4	2	1	1	1	5	1	15	15	5
20060009000	1	0	5	1	1	1	1	0	4	3	4	4	11	3	4	5	3	3	2	1	2	2	0	0	0	2	3	1	1	1	1	1	0	0	0	0	0	1	13	5	3	3	4	2	4	1	22	12	11
20060010000	1	0	7	1	0	0	0	0	1	2	2	2	6	3	1	2	4	2	2	0	2	2	0	1	0	1	2	1	1	1	0	0	0	0	0	0	0	1	10	3	2	2	2	3	4	2	18	6	10
20060011010	1	0	3	1	3	0	0	0	4	1	1	3	5	1	3	1	1	1	1	0	1	1	0	0	0	3	1	1	1	1	0	0	1	0	0	0	0	0	9	2	2	1	1	4	1	1	12	5	4
20060012000	1	0	9	0	0	1	1	0	2	2	3	4	9	3	1	4	3	3	2	0	1	2	0	1	0	3	3	1	1	3	0	1	1	0	0	0	0	0	16	5	2	4	4	6	1	4	26	8	9
20060015000	0	0	1	1	1	1	1	1	5	4	4	3	11	3	3	4	3	1	2	0	1	2	0	1	0	3	1	1	2	1	1	1	1	0	0	0	0	0	14	6	3	1	3	1	3	1	18	10	7
20060016000	0	0	5	1	2	1	1	0	5	3	3	3	9	3	3	3	2	2	2	0	2	2	0	0	1	2	3	1	1	4	0	1	1	0	0	0	0	1	17	4	3	1	3	3	4	3	21	9	8
20060017000	1	0	2	0	0	0	0	0	0	1	2	2	5	1	2	3	2	2	2	0	1	1	0	0	0	1	2	1	1	2	1	1	1	0	0	0	0	1	12	3	1	2	2	3	2	3	16	6	7
20060018000	1	0	2	1	2	0	1	0	4	3	2	3	8	3	2	1	2	2	1	0	1	1	0	0	0	1	2	1	1	1	0	0	0	0	0	0	0	0	7	2	1	1	1	1	2	1	9	6	6
20060020000	1	0	2	0	3	0	1	0	4	1	1	2	4	3	1	2	1	1	1	0	1	1	0	0	0	1	1	1	1	1	0	1	0	0	0	0	0	0	7	2	3	1	2	1	2	1	12	6	4
20060021000	1	0	3	0	6	0	1	0	7	3	3	1	7	3	4	3	1	1	1	0	1	1	0	0	0	1	3	1	1	2	0	0	1	0	0	0	0	0	10	4	2	4	2	2	2	1	17	10	4
20060023000	1	0	2	1	2	0	1	0	4	2	2	2	6	2	3	3	3	4	3	1	3	2	0	1	0	4	3	1	3	3	0	1	1	1	0	0	0	0	20	3	4	3	2	2	3	2	19	8	14
20060024010	0	0	6	1	0	1	1	0	3	1	1	1	3	3	2	1	1	1	1	0	1	1	0	0	0	1	1	1	1	1	0	0	1	0	0	0	0	0	7	6	2	1	1	1	1	1	13	6	4
20060028010	0	0	1	1	1	0	1	0	3	1	1	1	3	1	3	2	1	1	1	0	1	2	0	0	0	5	1	1	1	1	0	1	1	0	0	0	0	0	13	3	3	2	2	2	2	1	15	6	4
20060029010	1	0	5	0	1	0	1	0	2	3	5	4	12	5	2	5	1	1	1	0	1	1	0	0	0	1	1	1	1	1	1	1	0	0	0	0	1	1	10	6	2	1	1	2	2	1	15	12	4
20060030010	1	0	8	0	0	1	1	0	2	1	2	2	5	1	2	2	2	1	1	0	1	1	0	0	0	1	1	1	1	1	0	0	0	0	0	0	0	0	6	2	3	1	1	1	2	1	11	5	5
20060033000	1	0	6	1	1	1	1	0	4	1	1	3	5	3	4	2	3	3	2	0	1	1	0	0	0	2	2	1	1	2	0	0	1	0	0	0	0	1	11	3	3	1	2	2	1	1	13	9	9
20060034000	1	1	1	1	1	1	1	0	4	3	3	3	9	3	3	3	2	1	1	0	2	2	0	0	0	3	2	1	1	1	0	1	1	0	0	0	0	0	12	6	4	2	6	2	2	2	24	9	6
20060035000	1	1	4	1	2	0	1	0	4	3	3	3	9	3	1	1	3	2	1	0	3	2	0	1	1	5	2	1	2	2	1	1	0	0	0	0	0	1	19	5	2	2	3	2	2	1	17	5	9
20060037000	1	1	6	1	3	1	1	0	6	3	3	3	9	3	2	2	3	3	1	0	1	1	0	0	0	2	2	1	1	1	0	1	0	0	0	0	0	1	10	5	3	1	4	2	3	1	19	7	8
20060038010	1	0	3	1	2	1	0	0	4	2	3	2	7	1	1	1	1	1	1	0	1	1	0	0	0	3	1	1	1	1	0	1	1	0	0	0	0	0	10	3	1	1	1	2	1	1	10	3	4
20060040000	1	0	3	1	2	0	0	0	3	2	3	1	6	2	3	3	1	1	1	0	1	1	0	0	0	2	2	1	1	1	0	1	1	0	0	0	0	0	10	1	1	1	1	2	1	1	8	8	4
20060041110	1	0	4	1	1	1	1	0	4	4	3	3	10	2	1	2	1	1	1	0	1	1	0	0	0	1	3	1	1	1	0	1	1	0	0	0	0	0	10	2	2	1	1	4	4	1	15	5	4
20060046010	0	0	3	1	0	1	1	1	4	2	2	2	6	2	3	1	1	1	1	0	1	1	0	0	0	1	1	1	1	1	0	1	0	0	0	0	0	0	7	4	2	1	1	1	1	1	11	6	4
20060047010	1	0	2	1	0	0	0	0	1	1	1	2	4	1	1	1	2	3	1	0	1	1	0	0	0	1	1	1	1	1	0	0	1	0	0	0	0	0	7	2	2	1	2	1	1	1	10	3	7
20060048010	1	0	1	1	3	1	1	0	6	2	1	1	4	1	3	1	1	1	1	0	1	1	0	0	0	2	1	1	1	1	0	1	0	0	0	0	0	0	8	5	3	2	2	2	5	2	21	5	4
20060049010	1	0	4	0	0	0	0	0	0	3	3	3	9	4	1	2	1	2	1	0	1	1	0	0	0	1	1	1	1	1	0	0	1	0	0	0	0	1	8	2	2	1	2	2	2	1	12	7	5
20060050010	1	1	3	1	0	0	0	0	1	1	2	2	5	3	2	3	1	1	1	0	1	1	0	0	0	1	1	1	1	1	0	0	1	0	0	0	0	0	7	2	1	1	1	2	1	1	9	8	4
20060051000	1	1	3	1	0	0	0	0	1	2	3	1	6	1	2	2	1	3	1	0	1	1	0	0	0	1	1	1	1	1	0	0	1	0	0	0	0	0	7	3	3	1	1	2	1	1	12	5	6
20060053000	1	0	2	1	2	1	1	0	5	4	4	2	10	5	4	1	1	1	1	0	1	1	0	1	0	1	1	1	1	1	0	1	1	0	0	0	0	0	9	6	3	1	1	1	1	1	14	10	4
20060058000	1	1	1	1	2	1	1	0	5	3	3	2	8	4	3	3	1	1	1	0	1	1	0	0	1	2	1	1	1	1	0	0	0	0	0	0	0	0	8	5	3	2	2	2	4	2	20	10	4
20060059010	0	0	2	0	0	1	1	1	3	3	3	3	9	3	4	4	3	3	2	0	2	2	0	0	0	2	2	1	2	1	0	0	0	0	0	0	0	0	10	2	3	2	3	3	3	3	19	11	10
20060060000	1	1	6	1	3	1	1	0	6	3	3	3	9	3	3	3	3	3	3	1	2	2	1	1	0	2	2	2	2	2	0	1	1	0	0	0	0	1	17	6	3	2	2	3	5	2	23	9	12
20060062110	1	0	2	1	0	0	1	0	2	2	1	2	5	4	1	1	3	3	2	0	1	1	0	0	0	2	1	1	1	2	0	0	1	0	0	0	0	0	9	3	2	1	2	2	3	1	14	6	9
20060063000	0	0	6	0	0	0	1	0	1	2	2	2	6	1	2	2	2	3	2	0	1	2	0	0	0	3	3	1	1	1	0	1	0	0	0	0	0	1	13	5	2	1	2	2	3	2	17	5	8
20060065010	1	0	2	1	0	0	1	0	2	1	3	3	7	3	1	2	1	1	1	0	1	1	0	0	0	1	2	1	1	1	0	1	1	0	0	0	0	0	9	3	2	1	1	1	1	1	10	6	4
20060066000	0	0	2	1	1	1	1	0	4	3	3	3	9	4	3	3	1	3	2	0	2	2	0	0	0	3	1	1	1	1	0	0	1	0	0	0	1	0	11	3	2	1	4	2	3	1	16	10	8
20060067010	1	0	3	1	0	0	1	0	2	3	3	3	9	3	2	2	1	1	1	0	1	1	0	0	0	1	1	1	1	1	0	0	0	0	0	0	0	0	6	2	2	1	2	2	1	1	11	7	4
20060068000	1	0	2	1	3	1	1	0	6	3	4	3	10	4	5	5	3	5	3	0	3	2	0	0	0	3	2	1	3	1	1	1	1	0	0	0	0	1	16	5	4	4	4	4	5	2	28	14	14
20060070000	1	0	6	0	0	0	0	0	0	4	4	5	13	4	2	5	1	1	1	0	1	1	0	0	0	3	1	1	1	1	0	0	1	0	0	0	0	0	9	6	3	2	3	2	1	1	18	11	4
20060075010	1	0	3	1	3	1	1	0	6	3	3	2	8	5	1	1	3	4	1	0	1	3	0	0	0	2	2	1	2	2	0	0	1	0	0	0	0	1	14	4	2	2	5	4	4	2	23	7	9
20060076000	0	0	7	1	3	1	1	0	6	3	3	2	8	1	1	1	3	5	1	0	3	1	0	0	0	5	2	1	1	1	0	1	0	0	0	0	0	1	13	5	3	4	1	3	4	1	21	3	12
20060077000	0	0	20	1	4	1	1	0	7	2	2	2	6	3	2	3	3	3	4	1	3	3	1	1	1	3	4	3	2	2	1	1	1	1	1	1	1	1	28	2	4	6	5	2	2	5	26	8	14
20060079000	0	0	3	1	2	0	1	0	4	4	4	4	12	3	1	3	2	1	1	0	1	1	0	0	0	2	1	1	1	1	0	0	0	0	0	0	0	0	7	4	3	1	3	2	2	1	16	7	5
20060080000	1	0	6	0	2	0	0	0	2	1	1	2	4	3	3	3	1	1	1	0	1	1	0	0	0	2	1	1	1	1	0	0	0	0	0	0	0	0	7	4	3	1	1	3	4	2	18	9	4
20060082000	1	0	3	1	0	0	1	0	2	3	3	3	9	1	1	1	1	1	1	0	1	2	0	0	0	1	1	1	1	1	0	0	0	0	0	0	0	0	7	2	3	1	1	2	1	1	11	3	4
20060085000	1	0	9	0	0	0	0	0	0	3	3	3	9	3	3	1	1	2	1	0	1	1	0	0	0	3	2	1	1	1	0	0	0	0	0	0	0	0	9	2	2	1	1	2	1	1	10	7	5
20060086000	1	0	2	0	0	0	0	0	0	1	1	2	4	2	2	1	1	4	1	0	1	1	0	0	0	5	1	1	1	1	0	1	0	0	0	0	0	0	11	4	1	1	2	3	2	1	14	5	7
20060087000	1	0	4	1	4	0	0	0	5	3	3	2	8	2	1	1	1	2	1	0	1	1	0	0	1	2	1	1	1	2	0	0	0	0	0	0	0	0	9	4	2	1	1	1	5	1	15	4	5
20060088000	1	0	1	1	5	0	0	0	6	3	4	3	10	3	1	1	1	4	1	0	1	1	0	1	1	2	1	1	1	1	0	0	0	0	0	0	0	0	9	2	2	1	3	2	5	1	16	5	7
20060001011-21605	1	0	5	1	1	0	1	0	3	3	4	4	11	4	2	1	2	3	1	0	1	1	0	0	0	3	1	1	1	1	1	1	1	0	0	0	0	1	12	6	2	1	2	2	3	1	17	7	7
20060003001-10007	1	1	11	1	0	1	1	0	3	4	4	4	12	5	3	2	2	3	1	0	5	2	0	0	0	3	2	1	2	1	1	0	1	0	0	0	0	0	13	3	3	6	3	2	4	3	24	10	11
20060006111-22506	1	0	1	0	0	0	0	0	0	2	1	2	5	1	2	2	3	1	1	0	1	1	0	1	0	4	1	1	1	1	1	1	0	0	0	0	0	1	13	6	2	1	1	4	1	1	16	5	6
20060008012-10007-22705	1	0	7	1	2	1	1	0	5	3	3	3	9	2	4	2	1	2	1	0	1.12743	1	0	0	0	1	1	1	1	5	0	1	1	0	0	0	0	1	13	4	2	2	1	2	3	1	15	8	5.12743
20060013011-10007	1	0	5	0	0	0	1	0	1	1	1	1	3	3	1	2	1	3	1	0	1	1	0	0	0	3	3	1	1	1	0	0	1	0	0	0	0	0	11	2	4	1	1	2	1	1	12	6	6
20060014002-22101-22402	1	0	6	0	1	0	0	1	2	2	2	1	5	2	3	4	2	3	2	0	3	2	0	1	1	3	2	3	2	4	0	0	0	0	0	0	0	0	18	2	2	2	2	5	5	2	20	9	10
20060019010-10002	0	#NULL!	1	1	3	1	1	1	7	3	3	2	8	3	4	4	2	1	1	0	1	1	0	0	1	1	1	1	1	1	0	1	0	0	0	0	0	0	8	4	3	1	1	2	4	1	16	11	5
20060022010-10005-10007	0	0	3	0	0	1	1	0	2	3	2	2	7	2	2	2	1	5	1	0	1	2	0	0	0	3	5	1	1	1	0	0	0	0	0	0	0	0	13	3	4	1	2	1	2	1	14	6	8
20060025002-10007-22506	0	0	2	1	4	1	1	0	7	2	3	3	8	3	4	4	2	1	1	0	2	1	0	0	0	1	1	1	1	1	0	0	1	0	0	0	0	0	7	5	3	1	1	2	2	1	15	11	6
20060026011-22101	1	1	3	0	7	1	1	0	9	4	3	4	11	4	3	4	2	3	1	0	1	1	1	1	1	1	3	1	1	1	0	1	1	0	0	0	0	0	13	3	3	5	2	2	4	1	20	11	7
20060027001-10007	1	0	10	1	3	1	1	0	6	3	3	3	9	3	1	1	1	1	1	0	1	1	0	0	0	1	1	1	1	1	0	1	1	0	0	0	0	0	8	4	4	1	1	2	2	1	15	5	4
20060031001-22503	1	1	10	0	1	0	0	0	1	3	3	4	10	3	2	3	2	2	2	1	2	2	1	1	1	3	3	1	2	3	0	0	0	0	0	0	0	0	17	1	3	1	2	2	2	1	12	8	9
20060032002-20602-22304	0	1	10	1	4	1	1	0	7	3	3	2	8	5	3	2	2	1	1	0	1	1	0	0	1	3	1	1	1	1	0	1	1	0	0	0	0	0	11	6	3.20776	4	2	2	5	1	23.2078	10	5
20060036001-22506	1	1	2	0	0	0	0	0	0	3	3	3	9	3	2	3	1	1	1	0	1	1	0	0	0	1	1	1	1	1	0	0	0	0	0	0	0	0	6	2	2	1	1	2	4	1	13	8	4
20060039001-22503	1	0	7	1	1	1	1	0	4	3	4	2	9	4	2	5	4	2	1	0	1	1	0	0	0	1	1	1	1	1	0	0	1	0	0	0	0	0	7	6	3	4	4	2	1	6	26	11	8
20060042111-22503	1	0	3	1	2	1	1	0	5	1	3	3	7	3	3	1	1	1	1	0	1	1	0	0	0	3	1	1	1	1	0	1	0	0	0	0	0	0	9	2	2	2	1	2	3	1	13	7	4
20060043001-22503	1	0	5	1	2	1	1	0	5	3	4	3	10	3	2	2	3	2	3	0	2	2	0	1	0	3	1	1	3	1	0	0	0	0	0	1	0	0	13	2	2	2	3	3	1	1	14	7	10
20060044001-21606	1	1	6	1	2	1	1	1	6	5	5	4	14	4	4	3	1	2	1	0	1	1	1	0	0	2	2	1	1	5	0	0	0	0	0	0	0	0	13	3	2	3	3	3	1	3	18	11	5
20060045001-22304	1	1	20	1	3	1	1	1	7	2	2	2	6	4	4	5	2	1	1	0	1	2	0	0	0	5	4	1	2	5	1	1	0	0	0	0	0	1	22	5	2.94856	1	1	1	4	1	15.9486	13	5
20060052101-22503	0	1	3	1	7	1	1	0	10	3	2	4	9	5	2	3	1	1	1	0	2	1	0	0	0	1	1	1	1	1	0	1	0	0	0	0	0	0	7	6	5	1	5	2	2	1	22	10	5
20060054001-21606	1	0	8	1	0	1	1	0	3	3	4	3	10	4	1	2	1	1	1	0	3	1	0	0	0	1	1	1	1	5	0	0	0	0	0	0	0	1	11	6	3	5	1	2	2	1	20	7	6
20060055001-22506	1	0	2	1	2	0	0	1	4	2	3	3	8	3	2	1	3	3	2	0	2	1	0	0	0	2	3	1	1	1	0	1	0	0	0	0	0	0	10	2	2	2	2	2	1	1	12	6	10
20060056001-10007	0	0	8	1	1	1	0	0	3	2	3	3	8	3	3	4	2	5	1	0	2	2	0	0	0	3	1	1	2	1	0	1	1	0	0	0	0	0	12	6	3	1	1	2	3	1	17	10	10
20060057012-22503-22504	1	0	2	0	0	0	0	0	0	3	3	2	8	4	2	2	2	1	1	0	1	2	0	0	0	1	5	1	1	1	0	1	1	0	0	0	0	0	13	4	3	1	1	1	2	1	13	8	5
20060061115-21606-22503-22504-22505-22506	0	0	4	1	4	1	1	0	7	3	3	4	10	2	3	3	1	1	1	0	1	1	0	0	0	1	1	1	1	1	0	1	0	0	0	0	0	1	8	6	4	1	6	1	6	1	25	8	4
20060064111-21606	1	0	3	1	2	0	1	0	4	3	3	3	9	4	5	3	1	5	1	0	1	1	0	0	0	1	1	1	1	1	0	0	0	0	0	0	0	0	6	1	1	1	1	1	1	1	7	12	8
20060069001-22503	1	0	2	0	0	1	1	0	2	3	3	3	9	3	1	4	3	5	2	0	1	2	0	0	0	1	2	1	1	1	0	1	1	0	0	0	0	0	10	5	2	3	4	4	2	2	22	8	11
20060071001-21606	1	0	2	0	0	0	0	0	0	3	3	3	9	1	1	1	1	1	1	0	1	1	0	0	0	4	1	1	1	1	0	0	0	0	0	0	0	0	9	5	3	1	1	1	2	1	14	3	4
20060072001-22506	1	0	6	0	2	1	1	0	4	3	3	3	9	1	1	1	1	1	1	0	1	1	0	0	0	1	1	1	1	1	0	0	1	0	0	0	0	0	7	4	2	3	2	2	2	1	16	3	4
20060073001-22503	1	0	2	0	0	0	0	0	0	3	4	3	10	4	1	4	2	2	1	0	1	3	0	0	0	3	2	1	2	1	0	1	1	1	0	0	0	0	15	3	3	1	3	3	2	1	16	9	6
20060074001-22803	1	0	5	1	2	0	0	0	3	3	3	3	9	4	1	1	2	2	1	0	1	3	0	0.16702	0	2	2	1	1	1	0	0	0	0	0	0	0	0	10.167	5	3	1	2	2	2	2	17	6	6
20060078001-22503	1	0	4	0	1	0	1	0	2	1	3	1	5	3	3	2	1	1	1	0	1	1	0	0	0	2	1	1	3	5	0	1	1	0	0	0	0	0	15	3	2	6	1	3	1	3	19	8	4
20060081011-21201	1	0	2	0	0	0	1	1	2	2	3	3	8	3	3	3	1	1	1	0	1	1	0	0	0	3	2	1	1	1	0	0	0	0	0	0	0	0	9	5	4	1	1	1	4	1	17	9	4
20060083111-22503	1	0	3	0	1	1	1	1	4	1	1	1	3	1	4	2	2	1	1	0	1	1	0	0	0	2	2	1	1	1	0	0	0	0	0	0	0	0	8	1	1	1	1	1	1	1	7	7	5
20060084001-22506	1	0	4	0	0	0	0	0	0	4	4	4	12	4	3	2	1	3	1	0	1	1	0	0	0	4	1	1	1	1	0	0	1	0	0	0	0	0	10	4	2	1	2	2	2	1	14	9	6
20070002000	1	1	4	0	0	0	1	0	1	2	2	2	6	4	1	1	1	3	1	0	1	1	0	0	0	5	5	1	1	1	0	1	1	0	0	0	0	1	17	4	2	3	2	4	2	1	18	6	6
20070003000	1	1	3	1	2	0	1	0	4	3	3	3	9	3	2	2	2	3	1	0	1	1	0	1	0	1	1	1	1	5	0	0	1	0	0	0	0	0	12	4	2	2	1	2	3	1	15	7	7
20070004010	1	0	1	0	7	0	0	0	7	3	4	3	10	4	3	4	4	2	1	0	1	2	0	0	0	3	2	1	1	1	0	0	0	0	0	0	1	1	12	6	3	2	4	2	6	1	24	11	8
20070005010	1	1	5	1	0	1	1	0	3	5	5	4	14	5	3	5	1	3	1	0	1	1	0	1	1	5	2	1	1	1	1	1	1	0	0	0	0	0	16	6	2	1	3	3	2	2	19	13	6
20070008000	1	0	2	0	0	0	0	0	0	1	2	2	5	1	1	1	1	1	1	0	4	1	0	0	1	3	1	1	1	1	0	0	0	0	0	0	0	0	9	4	2	1	2	2	2	1	14	3	7
20070011000	1	1	1	1	1	0	1	0	3	2	3	1	6	3	2	4	2	2	1	0	1	1	0	0	0	1	1	1	1	2	0	0	0	0	0	0	0	0	7	4	2	2	1	2	1	1	13	9	6
20070012010	1	0	12	1	0	0	1	0	2	3	4	2	9	2	4	4	2	3	1	0	1	1	0	0	0	3	3	1	1	1	0	1	1	0	0	0	0	1	13	2	2	1	3	3	3	1	15	10	7
20070013000	1	0	8	1	7	0	1	1	10	3	3	3	9	3	3	4	1	1	1	0	1	1	0	0	1	2	1	1	1	2	0	1	1	0	0	0	0	0	11	3	2	2	3	2	5	2	19	10	4
20070016000	1	0	4	1	5	1	1	0	8	3	3	3	9	5	4	3	2	2	2	0	2	3	0	0	0	2	2	1	2	3	0	1	0	0	0	0	0	0	14	4	2	4	4	3	3	4	24	12	8
20070018000	1	0	2	0	2	0	0	0	2	1	1	3	5	3	1	1	1	1	1	0	1	1	0	0	0	3	1	1	1	1	0	1	1	0	0	0	0	1	11	2	2	1	1	2	1	1	10	5	4
20070019000	1	0	3	0	0	0	0	0	0	3	4	4	11	3	2	2	3	1	1	0	2	2	0	1	1	2	1	1	1	3	0	1	1	0	0	0	0	0	14	5	3	2	5	4	1	1	21	7	7
20070020100	0	0	3	0	0	0	0	0	0	4	4	3	11	1	1	3	2	3	2	0	4	3	0	0	0	2	1	1	1	1	0	1	1	0	0	0	0	0	11	5	3	6	4	4	2	4	28	5	11
20070022000	1	0	4	1	7	0	1	1	10	3	4	3	10	4	3	2	1	1	1	0	1	1	0	0	0	3	1	1	1	1	0	1	1	0	0	0	0	0	10	3	2	1	2	3	2	1	14	9	4
20070027000	1	0	6	1	3	1	1	1	7	2	4	4	10	3	1	2	3	3	1	0	1	2	0	0	1	2	1	1	2	1	0	0	0	0	0	0	0	0	10	3	2	2	3	2	4	1	17	6	8
20070029010	1	0	2	1	0	0	0	0	1	2	3	2	7	2	3	3	2	1	1	0	1	1	0	0	0	2	1	1	1	1	0	0	0	0	0	0	0	0	7	2	1	1	1	1	1	1	8	8	5
20070031000	1	0	12	1	5	0	0	0	6	2	3	2	7	4	3	1	2	1	1	0	1	1	0	1	0	1	1	2	1	1	1	1	0	0	0	0	0	1	11	4	1	1	3	1	2	2	14	8	5
20070032000	0	0	1	0	0	0	0	0	0	3	3	3	9	2	5	1	2	3	1	0	1	1	0	0	1	2	1	1	1	1	1	1	0	0	0	0	0	0	10	4	3	2	1	2	2	1	15	8	7
20070033010	0	0	3	1	6	1	1	1	10	2	3	3	8	5	3	3	2	1	2	0	2	2	0	0	0	3	1	1	2	2	0	0	0	0	0	0	0	0	11	5	2	2	3	2	6	2	22	11	7
20070034000	0	0	2	1	0	0	0	0	1	3	4	2	9	3	2	2	3	1	1	0	1	1	0	0	0	3	2	1	1	3	1	1	1	0	0	0	0	0	14	3	3	2	2	3	2	3	18	7	6
20070037000	1	0	7	1	6	1	0	0	8	1	3	3	7	4	3	3	2	1	1	0	1	1	0	0	0	5	1	2	1	2	0	1	1	0	0	0	0	0	14	5	2	1	1	2	2	1	14	10	5
20070038000	1	0	1	1	0	1	0	0	2	4	3	3	10	1	4	4	2	2	1	0	1	1	0	0	0	5	1	1	1	1	1	1	1	0	0	0	0	1	14	3	2	3	2	2	4	2	18	9	6
20070041010	0	0	2	1	2	0	1	0	4	2	3	2	7	1	2	1	1	2	1	0	1	1	0	0	1	3	1	1	1	1	0	0	0	0	0	0	0	0	9	3	1	1	2	2	2	1	12	4	5
20070042000	1	0	4	0	0	0	0	0	0	3	2	2	7	3	1	2	1	1	1	0	1	2	0	0	0	3	2	1	1	1	0	0	0	0	0	0	0	0	10	4	3	2	3	2	3	1	18	6	4
20070044010	1	1	3	0	0	0	0	0	0	3	3	2	8	1	3	1	1	1	1	0	1	1	0	0	0	1	1	1	1	1	0	0	0	0	0	0	0	0	6	4	3	4	1	1	3	1	17	5	4
20070045010	1	1	10	0	0	1	0	0	1	1	2	2	5	1	1	3	1	1	1	0	1	1	0	0	0	1	1	1	1	1	1	1	1	0	0	0	0	0	9	5	3	1	1	1	6	1	18	5	4
20070048000	1	0	2	1	5	1	1	0	8	3	3	3	9	3	2	3	1	1	1	0	1	3	0	1	0	1	1	1	1	1	0	0	1	0	0	0	0	0	10	5	3	1	6	1	1	1	18	8	4
20070049000	0	0	2	1	0	1	1	0	3	2	3	3	8	3	3	1	1	2	1	0	1	1	0	0	0	2	2	1	1	1	0	1	1	0	0	0	0	1	11	6	3	1	3	2	4	1	20	7	5
20070050000	1	0	10	1	6	0	1	0	8	3	3	3	9	3	2	2	1	1	1	0	1	1	0	0	0	2	1	1	1	1	0	0	1	0	0	0	0	0	8	4	3	2	3	3	2	1	18	7	4
20070051000	1	0	6	0	0	0	0	0	0	3	3	5	11	3	2	3	1	5	1	0	1	1	0	1	0	2	2	1	1	2	0	1	0	0	0	0	0	0	11	6	3	2	4	3	6	1	25	8	8
20070055000	0	0	3	0	0	0	0	0	0	4	3	3	10	1	1	1	3	1	1	0	3	1	0	0	0	2	2	1	2	3	0	0	0	0	0	0	0	1	12	6	3	1	5	2	4	4	25	3	8
20070056000	0	0	6	1	0	1	1	0	3	2	3	3	8	1	1	1	2	1	2	0	1	1	0	0	0	1	1	1	1	1	0	0	0	0	0	0	0	0	6	6	2	1	1	1	2	1	14	3	6
20070057000	0	0	10	1	0	1	1	0	3	3	3	2	8	4	1	1	1	1	1	0	1	2	0	0	0	2	1	1	1	1	0	0	0	0	0	0	0	0	8	6	5	3	1	2	1	1	19	6	4
20070058000	0	1	5	1	7	1	1	0	10	3	2	3	8	4	2	3	2	1	1	0	1	1	0	1	0	2	1	1	1	1	0	0	0	0	0	0	0	0	8	5	3	1	1	1	5	1	17	9	5
20070059010	0	0	2	1	7	1	1	1	11	2	3	3	8	4	2	2	1	1	1	0	1	1	0	0	0	2	1	1	1	3	0	0	0	0	0	0	0	0	9	4	2	1	3	2	5	1	18	8	4
20070060000	1	1	7	0	2	1	1	0	4	3	3	2	8	3	3	3	2	5	1	0	1	1	0	0	0	3	2	1	1	1	1	1	0	0	0	0	0	0	11	5	3	4	2	4	3	1	22	9	9
20070062000	1	0	1	1	0	1	1	0	3	3	3	3	9	5	4	4	1	1	1	0	1	1	0	0	0	1	1	1	1	1	1	1	0	0	1	0	0	1	10	4	2	1	2	1	2	1	13	13	4
20070063000	1	0	5	0	0	0	0	0	0	4	4	4	12	4	3	2	1	1	1	0	1	1	0	1	1	3	1	1	1	1	0	0	1	0	0	0	0	0	11	3	2	1	3	3	5	1	18	9	4
20070064000	0	0	10	1	4	1	1	0	7	2	2	3	7	4	3	4	2	1	1	0	1	1	0	1	0	1	1	1	1	2	0	1	1	0	0	0	0	0	10	6	3	2	1	2	2	5	21	11	5
20070067001	1	1	6	1	0	0	1	0	2	3	3	3	9	3	4	4	1	1	1	0	1	1	0	0	0	1	1	1	1	1	0	0	1	0	0	0	0	0	7	6	2	2	2	1	3	1	17	11	4
20070068000	1	0	5	1	7	1	1	0	10	3	3	3	9	1	1	3	1	1	1	0	1	1	0	0	1	3	1	1	1	3	0	0	0	0	0	0	0	0	11	6	3	1	6	2	5	1	24	5	4
20070069000	1	0	5	0	0	0	0	0	0	3	3	3	9	1	3	1	2	1	1	0	1	2	0	0	0	1	1	1	1	3	0	0	0	0	0	0	0	0	9	4	2	1	1	2	2	1	13	5	5
20070070100	0	0	8	0	0	0	0	0	0	3	3	2	8	2	3	2	2	1	1	0	1	1	0	0	1	1	1	1	1	2	0	1	0	0	0	0	0	0	9	6	4	1	2	2	6	1	22	7	5
20070073000	1	0	10	1	6	1	1	0	9	4	4	3	11	2	1	3	2	2	1	0	1	2	0	0	0	5	1	1	1	1	0	1	1	0	0	0	1	0	14	5	3	4	6	3	4	1	26	6	6
20070074000	1	0	5	0	1	1	1	0	3	1	3	1	5	3	3	3	1	1	1	0	2	1	0	0	0	5	5	1	1	1	0	1	0	0	0	0	1	0	16	2	1	1	1	2	1	1	9	9	5
20070075000	1	0	3	0	7	1	1	0	9	5	5	3	13	4	1	4	2	2	1	0	1	1	0	0	0	5	1	1	1	1	0	0	0	0	0	0	0	0	10	2	2	1	2	2	2	1	12	9	6
20070001001-22503	1	0	1	1	2	1	0	0	4	1	1	1	3	4	3	4	2	1	1	0	1	1	0	0	0	1	1	1	1	1	1	0	0	0	0	0	0	0	7	3	3	1	3	1	1	1	13	11	5
20070006101-21606	1	0	1	1	0	0	0	0	1	1	1	3	5	1	1	1	1	1	1	0	1	1	0	0	0	1	2	1	1	2	0	1	1	0	0	0	0	0	10	1	1	6	1	1	2	1	13	3	4
20070007001-22506	0	0	2	0	7	1	1	1	10	5	5	5	15	4	3	4	1	4	1	0	1	3	0	0	0	3	3	1	2	4	1	1	1	0	0	0	0	0	19	5	3	1	4	2	5	2	22	11	7
20070009002-10007-22503	0	0	5	1	2	1	1	1	6	3	2	4	9	2	3	4	4	3	4	1	3	3	1	0	1	1	3	2	4	2	0	1	1	1	0	0	0	1	21	3	4	3	3	3	2	5	23	9	15
20070010001-22506	1	0	2	0	0	0	0	0	0	3	4	2	9	3	1	3	2	1	1	0	1	1	0	1	1	2	1	2	1	3	0	1	0	0	0	0	0	1	14	3	2	2	3	3	1	1	15	7	5
20070014001	1	0	2	1	7	1	1	0	10	3	5	2	10	3	2	2	1	1	1	0	1	1	0	0	0	1	1	1	1	1	0	0	1	0	0	0	0	0	7	3	2	1	1	1	6	1	15	7	4
20070015001-22503	1	0	3	0	0	0	0	0	0	4	4	3	11	4	3	3	1	1	1	0	1	1	0	1	0	1	1	1	1	1	0	1	1	0	0	0	0	0	9	4	2	1	3	2	3	1	16	10	4
20070017101	1	1	2	0	5	1	1	0	7	2	3	3	8	4	2	4	3	3	3	0	1	1	0	0	0	2	1	1	1	1	0	0	0	0	0	0	0	0	7	6	3	5	3	3	1	3	24	10	10
20070021002-10007-22503	1	0	1	1	0	0	1	1	3	1	3	3	7	3	1	2	1	5	2	0	1	1	0	0	0	5	1	1	3	1	0	1	1	0	0	0	0	0	14	3	2	3	2	3	3	1	17	6	9
20070023003-21701-21702-22503	1	0	12	0	0	0	1	0	1	3	4	3	10	3	1	3	4	3	3	1	3	3	1	0	0	2	3	1	2	5	0	1	1	0	0	0	0	0	19	5	3	3	3	1	5	4	24	7	14
20070024002-10009-22302	1	0	#NULL!	0	4	1	1	0	6	4	2	3	9	4	3	1	2	2	1	0	1	1	0	0	1	1	1	1	1	4	0	1	1	0	0	0	0	0	12	4	3	1	3	4	2	1	18	8	6
20070025001-22503	1	0	1	1	3	0	0	0	4	2	1	1	4	2	1	1	3	3	1	0	1	1	0	0	0	4	3	1	1	1	0	1	0	0	0	0	0	1	13	3	3	1	2	3	2	2	16	4	8
20070026102-10007-21606	1	0	2	0	5	1	1	0	7	2	2	3	7	1	1	3	1	2	1	0	1	1	0	0	0	1	1	1	1	1	0	1	1	0	0	0	0	0	8	6	4	4	3	3	2	3	25	5	5
20070028012-22304-22503	1	0	5	1	1	1	1	1	5	3	3	4	10	5	5	5	1	1	1	0	1	1	0	0	0	1	1	1	1	1	0	0	0	0	0	0	0	0	6	6	3.73127	3	3	2	3	3	23.7313	15	4
20070030101-22503	1	0	1	0	4	0	0	0	4	4	2	3	9	3	2	2	2	1	1	0	1	1	0	0	0	4	1	1	1	1	0	0	0	0	0	0	0	0	9	3	2	3	3	3	1	3	18	7	5
20070035003-22302-22303-22506	1	0	13	0	0	0	0	0	0	2	2	2	6	2	3	3	1	3	1	0	1	1	0	0	0	1	3	1	1	1	0	0	0	0	0	0	0	0	8	3.02701	2	2	2	1	2	1	13.027	8	6
20070036011-22503	0	1	6	1	0	0	0	0	1	1	1	1	3	1	1	1	1	1	1	0	1	1	0	0	0	1	1	1	1	1	0	0	1	0	0	0	0	0	7	4	2	1	1	1	6	1	16	3	4
20070039101-21606	1	0	4	1	0	0	0	0	1	3	4	2	9	4	4	3	3	2	1	0	1	2	0	0	0	5	2	1	1	1	0	1	1	0	0	0	0	0	14	6	5	1	4	4	1	1	22	11	7
20070040002-10007-22506	1	0	2	1	0	1	1	0	3	1	3	2	6	1	2	1	2	1	1	0	1	1	0	0	0	2	1	1	1	1	0	1	0	0	0	0	0	0	8	3	2	2	2	1	2	1	13	4	5
20070043002-21606-22506	1	1	2	1	3	1	1	0	6	2	1	3	6	3	3	3	1	1	1	0	1	1	0	0	0	5	2	1	1	1	0	1	1	0	0	0	0	0	13	3	2	1	1	3	2	1	13	9	4
20070046002-22503-22505	1	1	4	0	0	0	0	0	0	3	3	2	8	3	4	2	3	3	1	0	3	1	0	0	0	2	1	1	2	3	0	1	0	0	0	0	0	0	11	5	3	5	2	4	4	2	25	9	10
20070047002-22503-22505	1	1	1	1	4	0	1	0	6	3	3	4	10	3	2	4	1	3	2	0	1	2	1	0	1	2	2	1	1	1	1	1	1	0	0	0	0	0	14	5	4	1	3	5	4	1	23	9	7
20070052001-10007	0	0	10	1	7	1	1	1	11	3	2	3	8	4	4	2	1	1	1	0	1	1	0	0	0	2	2	2	1	1	0	0	1	0	0	0	0	1	11	4	3	3	2	2	3	2	19	10	4
20070053119-22502-22503-22504-22505-22702-22703-22704-22705	1	1	4	0	0	0	0	0	0	4	4	3	11	3	2	2	1	1.66322	0.897844	-0.0389237	0.733021	1	0	0	0	2	1	1	1	1	0	1	1	0	0	0	0	0	9	4	2	1	1	2	4	1	15	7	4.25516
20070054001-22503	1	1	6	1	5	1	0	0	7	4	3	5	12	4	1	2	2	1	1	1	1	1	0	1	0	2	2	1	1	1	0	1	0	0	0	1	0	1	12	6	2	1	3	3	5	3	23	7	6
20070061001-10007	1	1	3	0	0	0	0	0	0	2	4	3	9	2	2	1	2	5	1	0	1	1	0	0	0	3	4	1	1	1	0	0	1	0	0	0	0	0	12	3	2	2	1	6	2	1	17	5	9
20070065001-22503	1	0	1	0	0	0	0	0	0	3	3	3	9	3	2	3	1	1	1	0	1	1	0	0	0	2	2	1	1	1	0	1	1	0	0	0	0	0	10	2	1	1	1	2	2	1	10	8	4
20070066009-22503-22802-22803-22804-22805-22806-22807-22808-22809	0	1	3	1	7	1	1	1	11	3	3	3	9	3	4	3	1	4	3	1	2	1	0.431829	0.385101	0.491692	2.83649	2.71565	1.45669	1.53125	1.58258	0	1	1	1	0	0	0	0	15.4313	3	2	4	5	2	6	2	24	10	11
20070071016-10007-22502-22503-22504-22505-22506	0	0	3	1	0	1	0	0	2	1	1	1	3	3	1	1	1	1	1	0	1	1	0	0	0	1	1	1	1	1	0	0	0	0	0	0	0	0	6	6	4	1	1	2	1	1	16	5	4
20070072011-22503	1	0	13	0	1	0	1	0	2	3	1	3	7	3	1	1	1	5	1	0	1	1	0	0	0	3	3	1	1	1	0	0	0	0	0	0	0	0	10	5	3	1	2	2	5	1	19	5	8
20080001000	0	1	3	0	0	1	1	1	3	4	3	3	10	1	3	3	1	3	1	0	1	1	0	0	0	4	3	1	1	1	0	0	0	0	0	0	0	0	11	5	3	1	3	3	5	2	22	7	6
20080003000	1	0	5	1	2	1	1	1	6	3	3	1	7	1	1	1	1	1	1	0	1	1	0	0	0	1	2	1	1	2	0	0	0	0	0	0	0	0	8	4	3	1	2	1	3	1	15	3	4
20080004100	0	1	5	1	2	1	0	0	4	3	3	3	9	3	4	4	1	1	1	0	1	1	0	0	0	4	4	1	1	1	0	0	0	0	0	0	1	0	13	6	3	1	2	1	3	1	17	11	4
20080005000	1	0	1	1	7	0	0	0	8	1	3	2	6	1	2	1	1	1	1	0	1	1	0	0	0	2	1	1	1	1	0	0	0	0	0	0	0	0	7	6	4	1	1	3	6	1	22	4	4
20080006010	1	0	13	0	1	1	1	0	3	2	3	2	7	4	1	1	1	1	1	0	1	1	0	0	0	1	1	1	1	1	0	1	0	0	0	0	0	0	7	2	1	1	1	4	2	1	12	6	4
20080007000	1	1	9	1	0	1	1	1	4	3	3	3	9	4	3	3	1	1	1	0	1	1	0	1	1	3	1	1	1	3	0	1	1	0	0	0	0	1	15	3	2	2	2	2	3	1	15	10	4
20080009000	1	0	3	1	0	0	0	0	1	1	2	1	4	2	3	3	1	2	1	0	1	2	0	0	0	5	1	1	1	1	1	0	0	0	0	0	1	0	13	2	2	1	1	2	1	1	10	8	5
20080010010	1	0	7	1	6	1	1	1	10	2	2	3	7	2	3	3	1	2	2	0	1	1	0	0	0	1	2	1	1	2	0	1	1	0	0	0	0	0	10	3	2	1	2	1	2	4	15	8	6
20080011000	1	0	11	1	6	1	1	1	10	2	1	1	4	1	1	2	1	1	1	0	1	1	0	0	0	2	2	1	1	1	1	1	1	0	0	0	0	0	11	3	3	1	1	2	1	1	12	4	4
20080011000	1	0	11	1	6	1	1	1	10	2	1	1	4	1	1	2	1	1	1	0	1	1	0	0	0	2	2	1	1	1	1	1	1	0	0	0	0	0	11	3	3	1	1	2	1	1	12	4	4
20080012000	1	0	2	1	0	0	1	0	2	3	3	3	9	4	3	3	2	2	2	1	2	3	0	0	0	2	2	1	1	1	0	0	0	0	0	0	0	0	10	4	4	4	2	2	2	2	20	10	9
20080013000	1	0	2	1	0	0	0	0	1	5	3	4	12	3	4	3	2	4	1	0	1	1	0	0	0	5	2	1	2	2	1	0	0	0	0	0	1	1	16	5	3	5	4	6	4	4	31	10	8
20080014000	1	0	4	1	7	1	1	1	11	3	3	3	9	2	2	2	3	5	2	0	3	2	0	0	0	3	3	1	1	1	0	1	1	0	0	0	0	1	14	6	4	4	4	5	5	3	31	6	13
20080015010	1	0	4	1	2	0	1	0	4	5	5	5	15	5	5	5	2	2	1	0	1	1	0	0	0	1	1	1	1	1	0	1	0	0	0	0	0	0	7	4	3	5	2	2	1	2	19	15	6
20080017000	0	0	1	1	7	1	1	0	10	3	4	3	10	1	2	3	3	4	3	0	3	1	0	0	0	3	1	1	1	1	0	0	0	0	0	0	0	0	8	6	3	2	2	2	1	1	17	6	13
20080018000	1	0	6	1	3	1	1	0	6	3	3	3	9	3	2	3	3	2	3	0	3	3	1	0	0	2	2	1	2	1	0	1	1	0	0	0	0	0	14	4	2	2	4	2	5	2	21	8	11
20080020010	1	0	4	1	7	1	1	1	11	3	3	3	9	3	2	2	1	4	1	0	1	1	0	0	1	1	1	1	1	1	0	0	0	0	0	0	0	0	7	3	1	1	1	2	3	1	12	7	7
20080021010	1	0	2	1	3	1	1	0	6	3	3	3	9	2	2	2	1	2	1	0	1	1	1	1	1	1	1	1	1	1	0	0	0	0	0	0	0	0	9	1	1	1	1	1	1	1	7	6	5
20080022010	1	0	2	1	2	1	1	0	5	2	2	2	6	2	2	2	1	1	1	0	1	1	0	0	1	1	1	1	1	1	0	0	0	0	0	0	0	0	7	1	1	1	1	1	1	1	7	6	4
20080023110	0	0	1	1	5	1	0	0	7	3	4	3	10	3	1	1	3	3	2	0	1	1	0	0	0	1	3	1	1	1	0	1	1	0	0	0	1	0	11	5	4	1	1	1	5	1	18	5	9
20080024000	0	0	5	1	3	1	1	0	6	4	4	4	12	3	2	3	3	3	1	0	3	2	1	1	0	2	3	2	2	3	0	1	0	0	0	0	0	0	17	4	2	5	4	5	2	6	28	8	10
20080025010	0	0	1	1	7	1	1	1	11	1	2	3	6	1	1	1	2	2	1	0	1	2	0	0	0	1	2	1	1	2	0	0	1	0	0	0	0	0	10	2	2	1	2	1	2	1	11	3	6
20080027000	0	0	6	1	1	1	1	1	5	3	4	3	10	3	2	4	3	2	2	0	5	3	0	0	0	1	1	1	1	3	0	1	1	0	0	0	1	0	13	5	5	5	4	3	2	2	26	9	12
20080028010	0	0	3	0	0	0	0	0	0	2	2	2	6	2	1	1	1	1	1	0	1	1	0	0	0	1	1	1	1	1	0	0	0	0	0	0	0	0	6	3	3	1	1	2	4	1	15	4	4
20080029100	1	0	2	0	0	0	0	0	0	3	3	3	9	3	2	3	2	1	1	0	1	1	0	0	1	1	2	1	1	1	0	1	0	0	0	0	0	0	9	3	1	1	1	2	2	1	11	8	5
20080030001-10009	0	1	#NULL!	1	0	0	0	0	1	3	3	2	8	3	3	4	1	1	1	0	1	1	0	0	0	1	1	1	1	1	0	1	0	0	0	0	0	0	7	2	1	1	1	2	6	1	14	10	4
20080031000	0	1	4	1	0	1	1	0	3	2	3	2	7	3	2	1	1	2	1	0	1	1	0	0	0	2	1	1	1	1	0	0	0	0	0	0	0	0	7	4	2	2	2	2	5	1	18	6	5
20080032000	0	1	4	1	6	1	1	0	9	3	3	3	9	4	5	5	1	1	1	0	1	1	0	0	0	3	1	1	1	1	0	0	1	0	0	0	1	0	10	5	3	1	1	2	2	1	15	14	4
20080033000	0	0	2	0	1	0	0	0	1	3	3	3	9	2	2	2	3	1	1	0	1	1	0	1	0	1	3	1	2	1	0	1	1	0	0	1	0	0	13	1	1	1	2	1	3	2	11	6	6
20080034000	1	0	5	1	0	1	1	0	3	4	3	3	10	3	2	3	3	2	1	0	1	1	0	0	1	5	5	1	1	5	0	1	1	0	0	0	0	0	21	6	3	1	1	2	1	1	15	8	7
20080035000	1	0	6	1	2	0	0	0	3	3	4	4	11	2	3	4	3	1	1	0	1	1	0	0	0	2	2	1	1	1	0	0	0	0	0	0	0	0	8	2	1	1	1	1	2	1	9	9	6
20080036000	0	0	2	1	2	1	1	0	5	1	1	1	3	2	3	1	2	1	1	0	1	1	0	0	1	1	1	1	1	1	0	1	1	0	0	0	0	0	9	6	3	1	1	1	2	1	15	6	5
20080037000	1	0	2	0	0	0	0	0	0	3	3	2	8	3	3	4	2	1	1	0	1	1	0	0	0	1	1	1	1	1	0	0	0	0	0	0	0	0	6	3	2	1	2	3	4	1	16	10	5
20080038000	1	1	20	1	0	1	1	0	3	1	3	2	6	5	1	5	1	1	1	0	1	1	0	0	0	1	1	1	1	2	0	0	0	0	0	0	1	0	8	3	3	1	2	1	2	1	13	11	4
20080039010	1	1	20	1	0	0	1	0	2	1	3	1	5	5	2	3	1	1	1	0	1	1	0	0	0	1	1	1	1	1	0	1	0	0	0	0	0	0	7	5	2	1	1	1	1	1	12	10	4
20080040010	1	1	20	1	0	0	1	0	2	1	3	1	5	5	1	2	1	2	1	0	1	1	0	0	1	1	1	1	1	1	0	1	1	0	0	0	0	0	9	5	1	1	1	2	2	1	13	8	5
20080041000	1	0	2	0	0	0	0	0	0	3	1	2	6	3	4	1	2	2	1	0	1	1	0	0	0	4	2	1	1	1	0	0	0	0	0	0	0	0	10	6	2	1	2	3	1	1	16	8	6
20080042000	1	0	4	1	1	1	1	0	4	3	3	3	9	2	3	1	1	3	1	0	1	1	0	0	1	5	1	1	1	1	0	0	1	0	0	0	0	0	12	6	3	1	1	1	5	1	18	6	6
20080043000	0	0	2	1	0	1	0	0	2	1	2	2	5	1	1	3	1	5	1	0	1	1	0	0	0	1	1	1	1	1	0	1	1	0	0	1	0	0	9	3	3	2	3	2	1	1	15	5	8
20080044010	0	0	5	0	0	0	0	0	0	3	4	3	10	1	3	3	1	1	1	0	1	3	0	0	0	1	1	1	1	1	0	0	1	0	0	0	0	1	10	6	3	1	1	1	4	1	17	7	4
20080045000	0	0	3	0	3	1	0	0	4	3	3	3	9	4	2	1	1	2	1	0	1	1	0	1	0	2	1	1	1	1	0	1	1	0	0	0	0	0	10	4	3	2	1	2	2	1	15	7	5
20080046000	1	1	4	0	0	1	1	0	2	1	1	2	4	3	3	3	3	2	1	0	1	2	0	0	0	3	3	1	1	1	0	1	1	0	0	0	0	0	13	2	2	3	1	2	2	2	14	9	7
20080047010	0	0	6	0	7	0	0	0	7	3	3	2	8	1	5	3	1	2	2	0	1	2	0	0	1	2	3	1	1	2	0	1	0	1	0	0	0	1	15	2	2	1	2	2	2	2	13	9	6
20080048010	0	1	5	1	4	1	1	1	8	4	5	4	13	3	2	1	1	1	1	0	1	1	0	1	1	2	1	1	1	1	0	1	1	0	0	0	0	0	11	3	3	1	1	2	4	1	15	6	4
20080049000	0	1	13	1	3	1	1	0	6	3	4	2	9	4	4	2	1	1	1	0	1	2	0	0	1	2	1	1	1	1	0	0	0	0	0	0	0	0	9	4	3	1	2	2	2	1	15	10	4
20080051100	0	0	1	0	0	0	0	0	0	3	4	2	9	3	3	3	3	3	2	0	1	2	0	0	1	3	3	1	2	1	0	0	1	0	0	0	0	0	14	3	2	2	3	3	2	2	17	9	9
20080052010	1	0	6	1	2	1	1	0	5	3	3	3	9	4	2	2	2	3	2	0	1	2	0	0	0	1	3	1	1	1	0	1	0	0	0	0	0	0	10	4	2	1	2	2	2	1	14	8	8
20080053100	1	0	1	1	2	1	1	1	6	3	3	3	9	3	2	3	2	2	2	0	1	3	0	0	0	1	1	1	1	1	1	0	1	0	0	0	0	0	10	2	2	2	2	2	3	2	15	8	7
20080054010	1	0	1	0	2	0	1	0	3	3	3	3	9	4	4	4	2	1	1	0	1	1	0	1	1	1	1	1	1	1	0	0	1	0	0	0	0	0	9	3	2	1	1	3	2	1	13	12	5
20080055010	1	0	4	0	0	0	0	0	0	3	3	3	9	2	1	1	1	2	1	0	1	1	0	0	1	3	3	1	1	1	0	0	1	0	0	0	0	0	12	3	2	2	2	3	5	1	18	4	5
20080057000	1	0	2	1	5	1	0	0	7	3	4	2	9	3	3	5	2	2	2	0	1	1	0	0	1	2	3	3	3	2	1	1	1	1	0	0	1	0	20	2	1	5	2	2	3	2	17	11	7
20080059000	1	0	3	1	0	0	0	0	1	1	1	2	4	3	1	1	2	3	2	0	2	2	0	0	0	2	3	1	2	1	1	1	1	0	0	0	0	1	15	3	2	3	2	1	3	2	16	5	9
20080060010	1	0	8	0	0	0	0	0	0	1	1	2	4	2	2	2	2	1	2	0	1	1	0	1	1	2	1	1	1	1	0	1	1	0	0	0	0	0	11	6	3	3	2	2	2	3	21	6	6
20080061000	1	0	7	1	3	1	1	0	6	2	2	3	7	1	1	2	1	1	1	0	2	2	1	0	0	1	1	1	2	1	0	1	0	0	0	0	0	0	10	5	2	5	3	3	1	4	23	4	5
20080062010	1	0	2	0	2	0	1	0	3	3	3	3	9	2	1	1	1	1	1	0	1	1	0	0	0	2	1	1	1	1	0	1	1	0	0	0	0	0	9	1	1	1	1	2	1	1	8	4	4
20080063000	1	0	1	0	2	0	1	0	3	3	3	3	9	1	1	2	2	1	1	0	1	1	0	0	0	1	1	1	1	1	0	0	1	0	0	0	0	0	7	2	2	1	2	2	1	1	11	4	5
20080064010	1	0	2	0	3	0	0	0	3	1	1	1	3	1	1	1	3	2	1	0	1	1	0	0	0	2	1	1	1	1	0	1	0	0	0	0	0	0	8	2	3	1	1	2	2	1	12	3	7
20080065000	1	0	2	1	3	1	1	0	6	4	4	4	12	4	2	1	3	1	1	0	5	1	0	0	0	1	1	1	1	3	0	1	0	0	0	0	0	0	9	6	3	4	4	4	4	1	26	7	10
20080067000	1	0	2	0	0	1	1	1	3	3	4	4	11	2	3	3	3	4	2	0	1	2	0	0	0	3	1	1	1	2	0	0	1	0	0	0	0	1	12	5	3	2	5	3	4	2	24	8	10
20080068000	1	0	14	1	0	0	1	0	2	2	3	3	8	3	2	1	2	3	1	0	1	1	0	0	0	5	2	1	1	1	0	1	0	0	0	1	0	1	14	6	2	2	2	3	2	1	18	6	7
20080070000	0	0	2	1	6	1	1	1	10	3	4	3	10	3	2	3	3	3	2	0	2	1	0	1	0	3	3	1	1	1	0	1	1	0	0	0	0	0	13	3	2	1	2	2	1	2	13	8	10
20080072010	0	0	3	0	0	0	1	0	1	4	3	2	9	2	4	5	2	1	1	0	1	1	0	0	0	1	1	1	1	1	0	1	1	0	0	0	0	0	8	4	2	1	1	1	2	1	12	11	5
20080073000	0	0	1	1	0	0	1	0	2	4	4	5	13	3	5	3	1	1	1	0	1	1	0	1	1	2	1	1	1	2	0	0	0	0	0	0	0	0	10	4	2	1	3	2	2	1	15	11	4
20080074000	0	0	8	1	0	1	1	1	4	3	3	3	9	4	3	2	3	1	1	0	1	1	0	0	0	1	1	1	1	3	0	0	0	0	0	0	0	0	8	6	5	1	4	3	3	1	23	9	6
20080076000	1	0	2	1	5	0	1	0	7	3	3	3	9	3	4	4	3	5	2	1	3	3	0	0	0	2	1	1	1	2	0	0	1	0	0	0	0	0	11	2	2	4	2	3	3	2	18	11	14
20080077000	1	0	2	0	1	0	0	0	1	3	3	2	8	3	1	2	2	2	1	0	1	2	0	0	1	2	3	1	1	2	0	0	1	0	0	0	0	0	13	4	2	1	1	3	3	3	17	6	6
20080078000	0	1	3	1	3	1	1	0	6	3	4	4	11	3	2	4	3	2	1	0	1	1	0	0	0	2	2	1	1	2	0	1	1	0	0	0	0	0	11	5	3	2	2	1	2	2	17	9	7
20080079000	1	1	1	1	1	1	1	0	4	2	3	2	7	1	2	2	1	1	1	0	1	1	0	0	0	5	1	1	1	1	0	1	0	0	0	0	0	0	11	2	1	1	1	2	1	1	9	5	4
20080080000	0	0	2	1	1	1	1	0	4	3	3	3	9	3	1	3	1	2	1	0	1	2	0	0	1	1	1	1	1	1	0	0	1	0	0	0	0	0	9	2	2	2	2	1	1	2	12	7	5
20080081010	0	0	2	1	0	1	1	0	3	3	4	3	10	3	1	1	2	1	2	1	1	1	0	1	0	2	2	1	1	1	0	0	0	0	0	0	0	0	9	2	1	1	3	2	4	1	14	5	7
20080082010	0	0	3	1	2	1	1	0	5	3	3	3	9	4	3	3	2	1	1	0	1	1	0	1	0	1	1	1	1	1	0	0	0	0	0	0	0	0	7	4	3	1	1	1	1	1	12	10	5
20080084010	0	0	6	1	0	1	1	0	3	2	4	3	9	3	2	4	1	1	1	0	1	1	0	0	0	3	1	1	1	1	0	0	1	0	0	0	0	0	9	3	2	1	1	1	2	1	11	9	4
20080085010	1	1	6	0	3	1	1	0	5	2	3	3	8	3	2	3	3	3	1	0	3	1	0	0	0	1	1	1	1	5	0	1	0	0	0	0	0	1	12	2	2	1	3	2	1	1	12	8	10
20080086010	1	1	2	1	5	1	1	0	8	2	2	2	6	3	1	3	1	1	1	0	1	1	0	0	0	1	3	1	1	3	0	0	1	0	0	0	0	0	11	4	2	4	2	2	3	2	19	7	4
20080002001-10007	1	0	3	1	0	0	1	0	2	3	3	3	9	2	4	1	3	1	1	0	1	1	0	0	0	2	1	1	1	1	1	0	0	0	0	0	0	0	8	3	1	2	2	1	2	2	13	7	6
20080008101-22802	0	0	4	1	0	0	0	0	1	1	2	2	5	1	1	1	2	2	3	0	2	2	0.410831	0	0	2	3	3	3	2	1	0	0	0	0	0	0	1	17.4108	2	4	3	2	2	5	1	19	3	9
20080016001-10007	1	0	3	0	1	0	0	0	1	3	3	3	9	2	2	2	3	3	3	1	1	1	0	0	0	3	3	1	1	1	0	0	1	0	0	0	0	0	11	5	3	5	5	6	2	5	31	6	11
20080019001-10007	0	0	3	1	7	1	1	1	11	2	4	4	10	4	2	3	1	2	1	0	1	1	0	0	1	3	1	1	1	1	0	0	1	0	0	0	0	0	10	3	2	1	2	2	4	1	15	9	5
20080026012-10007-20804	0	0	4	1	2	1	1	1	6	4	4	4	12	4	4	4	1	3	2	0	1	1	0	0	1	1	3	1	1	1	0	0	0	0	0	0	0	0	9	6	3	1	1	1	6	1	19	12	7
20080050012-10009-20101	0	0	#NULL!	0	0	0	0	0	0	3	3	4	10	3	2	3	1	1	1	0	1	1	0	1	0	1	1	1	1	1	0	0	0	0	0	0	0	0	7	1	1	1	1	2	1	1	8	8	4
20080056001-10007	1	0	1	1	5	1	1	0	8	3	4	2	9	3	4	5	2	2	2	1	2	2	0	0	0	2	2	1	1	3	0	1	1	0	0	0	0	1	14	4	3	3	3	5	2	2	22	12	9
20080058001-22506	1	0	5	1	2	1	1	0	5	3	3	3	9	3	1	3	1	3	1	0	1	1	0	0	1	1	3	1	1	1	0	0	0	0	0	0	0	0	9	2	1	1	1	1	2	1	9	7	6
20080066001-21606	1	0	6	1	1	1	1	0	4	3	4	4	11	3	3	3	3	2	3	0	3	3	0	0	0	1	2	1	1	1	0	1	1	0	0	0	0	0	11	6	5	5	4	4	2	1	27	9	11
20080069001-21804	0	0	2	1	1	0	1	0	3	2	4	3	9	3	3	3	1	3	3	1	3	1	0	0	0	1	1	1	1	1	0	0	1	0	0	0	0	0	7	1	3	1	1	3	1	1	11	9	11
20080071111-10009	0	1	#NULL!	1	7	1	1	1	11	5	5	4	14	3	2	3	1	1	1	0	1	3	0	0	1	1	1	1	1	1	0	0	1	0	0	0	0	1	11	5	3	1	6	2	3	1	21	8	4
20080075002-22102-22805	1	1	3	1	1	1	1	0	4	1	2	2	5	4	4	4	3	5	1	1	1	1	0	0	0	3.2775	4	1	1	2	1	0	1	0	0	0	0	1	15.2775	3	3	3	2	2	1	1	15	12	11
20080083001-22804	1	0	4	1	0	1	1	0	3	1	2	1	4	4	3	3	2	1	2	0	1	1	0	0	0.288416	1	2	1	1	1	0	0	0	0	0	0	0	0	7.28842	2	1	2	2	2	2	2	13	10	6
40090001000	1	0	6	1	1	1	1	0	4	3	4	3	10	5	3	3	2	2	1	0	1	3	0	0	1	3	1	1	1	3	0	1	1	0	0	0	0	1	16	6	3	2	2	2	2	2	19	11	6
40090002000	1	0	12	1	2	1	1	0	5	3	4	3	10	4	2	3	3	1	1	0	1	1	0	0	0	1	1	1	1	1	0	1	1	0	0	1	0	0	9	5	3	2	4	3	1	1	19	9	6
40090003000	1	1	7	1	7	1	1	1	11	3	2	2	7	4	1	2	1	1	1	0	3	1	0	0	0	1	5	1	1	2	0	1	1	0	0	0	0	1	14	4	2	1	3	1	3	1	15	7	6
40090004000	1	1	3	0	6	1	1	1	9	3	3	3	9	4	4	4	1	1	1	0	1	1	0	0	0	2	3	1	1	1	1	1	1	0	0	0	1	1	14	2	3	2	3	2	4	1	17	12	4
40090005000	1	0	6	1	3	1	1	0	6	3	3	3	9	4	2	4	1	3	1	0	1	1	0	0	0	1	1	1	1	1	0	0	0	0	0	0	0	1	7	4	2	1	1	2	2	1	13	10	6
40090007100	0	0	4	1	7	1	1	0	10	2	3	3	8	3	1	2	1	1	1	0	1	2	0	1	1	3	3	1	1	2	0	0	0	0	0	0	0	0	14	6	4	2	5	5	3	1	26	6	4
40090008000	1	0	7	0	0	1	0	0	1	2	3	1	6	4	2	3	2	1	1	0	1	1	0	0	0	2	1	1	1	1	0	0	0	0	0	0	0	0	7	4	2	2	1	2	1	1	13	9	5
40090009000	1	0	1	1	4	0	1	0	6	4	4	4	12	3	4	1	1	1	1	0	1	3	0	1	0	2	1	1	1	1	0	1	1	0	0	0	0	0	12	3	2	1	3	2	3	1	15	8	4
40090010000	1	0	4	1	3	1	1	0	6	3	4	4	11	3	2	2	2	1	1	0	1	2	0	0	0	5	1	1	1	5	0	1	0	0	0	0	0	0	16	6	3	1	3	2	2	1	18	7	5
40090011000	1	1	6	1	2	1	1	1	6	3	3	2	8	3	3	4	2	3	1	0	3	1	0	0	1	5	1	1	1	1	0	1	1	0	0	0	0	0	13	6	4	1	2	3	2	2	20	10	9
40090012000	1	1	2	1	4	1	1	1	8	3	3	3	9	4	3	2	3	4	1	0	4	2	0	0	0	2	3	2	1	2	0	1	1	0	0	0	0	1	15	6	4	3	4	2	6	2	27	9	12
40090014100	1	1	1	1	1	1	1	1	5	3	1	3	7	2	3	3	2	1	1	0	1	1	0	0	1	1	1	1	1	1	0	0	0	0	0	0	0	0	7	4	3	2	3	1	1	1	15	8	5
40090015000	1	1	5	1	1	1	1	0	4	2	3	2	7	4	3	3	1	1	1	0	1	1	0	0	1	2	1	1	2	1	0	1	0	0	0	0	0	0	10	6	4	2	3	2	1	1	19	10	4
40090017000	1	1	6	0	2	1	0	0	3	2	3	2	7	2	3	2	2	3	2	1	3	2	1	0	1	3	2	3	4	3	1	1	1	1	1	1	1	1	27	3	4	5	4	6	1	2	25	7	11
40090018000	1	1	7	0	3	1	1	0	5	4	4	5	13	4	4	4	3	1	1	0	1	1	0	0	1	1	1	1	1	1	0	1	0	0	0	0	0	0	8	3	1	1	2	3	5	1	16	12	6
40090019010	1	0	6	1	0	1	1	0	3	2	3	2	7	2	2	1	1	2	1	0	1	1	0	0	1	3	1	1	3	1	1	1	1	0	0	0	0	0	14	3	2	1	3	2	4	1	16	5	5
40090020000	1	0	12	1	6	1	1	1	10	4	4	3	11	4	1	1	4	5	4	1	4	3	1	1	1	5	5	1	4	4	1	1	1	1	0	0	1	1	31	5	4	5	6	1	6	2	29	6	18
40090021000	1	0	4	1	2	1	1	1	6	4	4	4	12	3	3	4	1	3	1	0	1	2	0	0	0	3	1	1	1	2	0	1	1	0	0	0	0	0	12	5	3	4	3	2	3	3	23	10	6
40090022000	1	0	10	1	4	1	1	0	7	2	2	3	7	1	1	1	2	3	2	0	1	1	0	0	1	1	1	1	1	1	0	1	0	0	0	0	0	0	8	6	3	3	2	2	2	2	20	3	8
40090023000	1	1	9	1	0	0	1	0	2	3	3	2	8	1	1	1	2	2	1	0	1	3	0	0	1	1	2	1	1	2	0	1	0	0	0	0	0	0	12	2	5	2	2	1	1	1	14	3	6
40090024000	1	1	3	1	1	1	1	1	5	2	3	3	8	3	1	2	2	2	1	0	1	1	0	0	0	3	1	1	1	1	0	0	1	0	0	0	0	0	9	4	2	2	2	2	3	1	16	6	6
40090025000	1	1	5	1	3	1	1	1	7	3	5	3	11	3	2	3	3	1	1	0	3	2	0	1	0	5	1	1	3	5	0	1	1	0	0	0	0	1	21	5	3	2	5	5	3	3	26	8	8
40090026010	1	1	2	1	3	1	1	1	7	3	3	3	9	4	3	3	2	1	1	0	1	1	0	0	1	1	1	1	1	1	0	1	1	0	0	0	0	0	9	4	3	3	3	3	1	1	18	10	5
40090027100	1	1	2	0	3	1	1	0	5	3	3	3	9	3	1	3	2	2	1	0	1	2	0	0	0	2	2	1	1	1	0	1	0	0	0	0	0	0	10	3	1	4	1	1	1	1	12	7	6
40090028000	1	1	2	1	0	1	1	0	3	2	2	2	6	5	1	2	2	1	1	0	1	2	0	0	0	1	1	1	1	2	0	1	0	0	0	0	0	0	9	2	2	2	2	1	2	1	12	8	5
40090030000	1	1	5	1	7	0	0	1	9	2	2	3	7	4	2	2	1	2	1	0	1	1	0	1	1	1	2	1	1	2	1	0	0	0	0	0	0	1	12	4	3	1	2	2	1	1	14	8	5
40090031000	1	0	5	1	1	0	1	0	3	2	3	3	8	2	2	3	3	4	2	0	1	2	0	0	0	5	3	1	1	1	1	1	1	0	0	0	0	1	17	6	4	2	3	3	6	1	25	7	10
40090032000	1	0	3	0	0	0	1	1	2	1	1	1	3	5	5	5	1	1	1	0	1	1	0	0	0	1	1	1	1	1	0	0	0	0	0	0	0	0	6	2	1	1	1	1	1	1	8	15	4
40090034000	1	1	5	1	4	1	1	0	7	1	2	2	5	2	3	2	3	3	1	0	1	1	0	0	0	2	2	3	1	3	1	0	1	0	0	0	0	1	15	6	2	4	4	2	5	2	25	7	8
40090035100	1	1	15	1	3	1	1	0	6	4	4	3	11	2	1	3	1	1	1	0	1	1	0	0	0	1	1	1	1	1	0	1	0	0	0	0	0	0	7	3	1	1	1	1	3	1	11	6	4
40090036000	1	1	2	1	4	1	1	0	7	2	2	2	6	2	1	4	2	1	2	0	1	1	0	1	0	2	1	1	2	1	0	1	0	0	0	0	0	0	10	2	2	1	2	2	3	2	14	7	6
40090037010	1	1	2	1	1	1	1	0	4	2	3	3	8	3	3	3	2	3	1	0	1	3	0	1	1	1	1	1	1	2	0	0	1	0	0	0	0	0	12	3	3	2	2	3	3	2	18	9	7
40090038000	1	1	7	1	0	1	1	1	4	3	3	3	9	3	2	3	2	1	1	0	1	1	0	0	0	3	1	1	1	1	0	1	1	0	0	0	0	1	11	3	3	2	2	2	2	2	16	8	5
40090042000	1	0	2	1	2	0	1	1	5	5	5	5	15	5	3	4	2	4	1	0	1	1	0	1	1	3	2	1	1	1	0	1	1	0	0	0	0	0	13	5	3	1	4	2	3	2	20	12	8
40090043000	1	0	3	1	6	1	1	0	9	3	3	2	8	2	4	3	2	3	1	1	1	1	0	0	0	2	2	1	1	1	0	1	0	0	0	0	0	0	9	6	3	2	3	3	1	1	19	9	8
40090044000	1	1	15	0	1	1	0	0	2	3	3	4	10	5	2	3	1	1	1	0	2	1	0	0	1	3	1	1	1	1	0	1	1	0	0	0	0	0	11	3	3	1	2	3	2	2	16	10	5
40090045000	1	1	1	1	2	1	1	0	5	3	3	4	10	3	2	2	2	4	1	0	1	1	0	0	0	5	4	1	1	3	0	1	0	0	0	0	0	0	16	6	2	1	1	6	1	1	18	7	8
40090047000	1	1	5	1	1	1	1	1	5	4	5	4	13	4	3	3	3	2	2	0	5	2	0	0	1	5	2	1	2	3	0	1	0	0	0	0	0	1	18	6	3	3	4	4	2	1	23	10	12
40090048000	1	1	3	1	7	1	1	1	11	4	4	4	12	4	4	4	3	3	2	0	2	1	1	1	1	3	3	1	1	2	0	1	1	0	0	0	0	1	17	2	3	3	3	2	3	3	19	12	10
40090049000	1	1	1	1	7	1	1	1	11	3	4	4	11	2	3	3	1	3	1	1	3	1	0	1	1	4	1	1	1	5	1	0	1	0	0	0	1	0	18	3	3	1	2	2	4	2	17	8	9
40090051000	1	1	5	1	6	1	1	1	10	3	3	3	9	4	3	3	3	1	1	0	1	1	0	0	0	2	1	1	2	1	0	1	0	0	0	0	1	0	10	4	3	2	2	2	2	2	17	10	6
40090052100	1	1	6	0	2	1	1	1	5	3	3	3	9	3	3	3	2	1	1	0	1	1	0	0	0	1	1	1	1	1	0	1	0	0	0	0	0	0	7	2	2	1	2	2	1	1	11	9	5
40090053000	1	1	3	0	1	1	1	1	4	3	2	2	7	3	2	2	3	3	2	1	2.68046	2	1	1	0	3	4	1	3	3	0	1	1	1	0	0	0	1	22	3	2	3	3	3	6	3	23	7	11.6805
40090056010	1	0	8	1	0	1	0	0	2	3	4	4	11	5	3	1	2	1	1	0	1	1	0	0	0	2	2	1	1	1	0	1	1	0	0	0	0	1	11	3	3	3	2	1	4	1	17	9	5
40090057000	1	1	6	0	0	1	1	0	2	3	3	3	9	4	3	3	1	4	1	0	4	1	0	0	0	2	3	1	1	3	0	0	1	0	0	0	0	0	12	5	4	2	3	2	1	1	18	10	10
40090058000	0	1	3	1	5	1	0	1	8	3	3	3	9	3	3	3	3	3	2	0	2	2	0	1	1	5	2	1	2	2	1	1	0	0	0	0	0	1	19	3	3	2	2	3	3	1	17	9	10
40090059000	0	1	5	1	3	1	1	0	6	3	3	2	8	4	3	2	3	4	2	1	2	1	0	0	0	5	2	1	1	1	0	1	0	0	0	0	0	1	13	4	2	4	3	4	4	2	23	9	12
40090060000	1	1	12	1	4	1	0	1	7	4	4	3	11	3	2	4	2	2	1	1	1	2	0	0	0	1	1	1	1	1	0	0	0	0	0	0	0	0	7	3	2	1	2	2	3	2	15	9	7
40090061010	1	1	2	1	2	1	1	0	5	4	4	3	11	4	1	5	1	2	1	0	1	1	1	0	0	2	1	1	1	1	0	0	0	0	0	0	0	0	8	4	2	3	3	3	4	1	20	10	5
40090064010	1	0	11	0	0	0	1	1	2	2	2	2	6	3	1	3	1	1	1	0	1	1	0	0	0	1	3	1	1	1	0	1	0	0	0	0	0	0	9	3	2	1	1	2	4	1	14	7	4
40090065000	1	0	5	1	0	1	1	0	3	3	3	2	8	4	1	1	3	3	1	0	2	1	0	0	0	2	2	1	1	1	0	1	0	0	1	0	0	0	10	6	3	4	2	1	6	1	23	6	9
40090066000	1	0	2	1	3	0	1	1	6	3	2	2	7	3	1	2	3	3	1	0	2	1	0	0	0	3	1	1	1	1	0	0	0	0	0	0	0	0	8	2	3	3	2	3	3	2	18	6	9
40090067000	1	0	3	1	7	1	1	1	11	5	5	5	15	4	3	4	3	5	2	0	1	2	0	0	1	4	1	1	1	2	0	0	0	0	0	0	0	0	12	4	3	2	6	2	6	1	24	11	11
40090069010	1	1	7	1	0	1	1	0	3	1	1	1	3	5	2	4	1	1	1	0	1	1	0	0	0	1	1	1	1	1	0	1	1	0	0	0	0	0	8	4	2	1	1	1	1	1	11	11	4
40090070010	1	1	5	1	5	1	1	0	8	3	3	3	9	3	2	3	1	1	1	0	5	1	0	1	1	1	1	1	1	1	0	0	1	0	0	0	0	1	10	5	3	1	2	2	2	1	16	8	8
40090006001-10007	1	0	2	1	3	1	1	1	7	3	4	3	10	1	1	1	2	5	1	0	5	1	0	0	0	2	1	1	1	1	1	0	1	0	0	0	0	0	9	6	3	5	3	2	2	3	24	3	13
40090013001-10007	1	1	20	1	0	0	0	0	1	3	3	3	9	3	2	1	3	1	1	0	1	1	0	0	1	1	1	1	1	1	0	1	1	0	0	0	0	1	10	6	3	1	1	2	3	1	17	6	6
40090016001-10009	1	1	#NULL!	1	1	0	1	1	4	3	3	4	10	3	2	3	2	5	1	0	2	2	0	0	0	2	1	1	2	1	0	1	1	0	0	1	0	1	13	5	4	1	2	1	3	1	17	8	10
40090029001-10007	1	0	15	1	3	1	1	1	7	2	2	2	6	2	2	2	2	5	1	0	1	1	0	0	0	5	5	1	1	1	0	1	1	1	0	0	0	1	18	6	3	6	1	2	1	1	20	6	9
40090033001-10008	1	1	2	1	0	1	1	0	3	3	3	2	8	4	2	4	3	1	1	0	1	1	0	0	0	3	2	1	1	2	0	1	1	0	0	0	0	0	12	3	2	2	5	2	2	2	18	10	6
40090039001-21603	1	1	2	1	0	0	1	0	2	2	2	2	6	4	1	4	4	1	1	0	1	1	0	1	1	1	1	1	1	1	0	1	1	0	0	0	0	0	10	5	2	1	1	1	1	1	12	9	7
40090040001-10008	1	1	4	0	1	0	0	0	1	3	2	4	9	3	1	3	3	4	1	0	1	1	0	0	0	2	2	1	1	1	0	1	0	0	0	0	0	1	10	3	3	2	3	2	5	2	20	7	9
40090041001-10009	0	0	#NULL!	1	0	1	0	0	2	3	3	3	9	4	3	2	1	5	1	0	1	1	0	0	0	1	1	1	1	1	0	0	0	0	0	0	0	0	6	3	2	1	1	3	1	1	12	9	8
40090046001-21606	1	1	7	1	2	1	1	0	5	2	3	2	7	5	3	3	1	2	1	0	1	1	0	0	0	5	1	1	1	2	0	1	0	0	0	0	0	0	12	2	2	1	3	2	2	1	13	11	5
40090050001-10007	1	1	2	0	3	1	1	1	6	5	5	5	15	5	2	2	2	2	1	0	1	1	0	0	0	1	2	1	1	2	0	1	0	0	0	0	0	1	10	4	2	3	2	3	1	1	16	9	6
40090054011-10005	1	1	#NULL!	0	0	1	1	0	2	1	3	2	6	3	2	1	2	1	1	0	1	1	0	0	0	1	1	1	1	1	0	0	0	0	0	0	0	0	6	3	4	1	2	2	2	2	16	6	5
40090055002-10002-22809	1	#NULL!	4	1	6	1	1	0	9	4	2	2	8	4	1	1	1	1	1	0	1	1	0	0	0	1	1	1	1	1.27972	0	0	1	0	0	0	0	0	7.27972	5	2	1	1	1	4	1	15	6	4
40090062001-10007	1	1	2	1	2	1	1	0	5	3	3	3	9	3	3	3	3	2	3	0	1	1	0	1	0	2	2	1	1	1	0	0	0	0	0	0	0	1	10	6	3	1	5	2	2	5	24	9	9
40090063001-10007	0	1	9	0	0	0	1	0	1	3	5	3	11	3	4	4	3	1	3	0	2	3	1	0	0	4	3	1	1	1	0	0	0	0	0	0	0	0	14	3	4	1	3	2	3	1	17	11	9
40090068011-22703	1	1	5	1	4	1	1	0	7	3	3	3	9	4	4	4	1	5	1.02824	0	1	1	0	0	0	1	1	1	1	1	0	0	0	0	0	0	0	0	6	2	2	1	1	1	2	1	10	12	8.02824
40101004010	1	1	6	1	0	0	0	0	1	3	2	3	8	3	1	1	2	2	1	0	1	1	0	0	0	2	1	1	1	2	0	1	1	0	0	0	0	0	10	5	3	4	3	2	2	1	20	5	6
40101006000	1	1	10	1	0	1	1	1	4	3	2	2	7	4	2	3	1	1	1	0	5	1	0	0	1	2	1	1	3	1	0	1	1	0	0	0	0	1	13	4	2	3	1	1	6	1	18	9	8
40101007010	1	0	20	1	5	0	1	0	7	2	3	3	8	4	3	3	3	4	1	0	1	1	0	1	1	4	3	1	1	2	0	1	0	0	0	0	0	1	16	4	3	3	2	2	5	2	21	10	9
40101008010	1	1	1	0	0	0	0	0	0	2	2	1	5	2	3	2	2	2	1	0	1	1	0	0	0	1	2	1	1	1	0	0	1	0	0	0	0	0	8	2	3	2	2	2	4	2	17	7	6
40101010010	1	0	12	0	1	0	1	0	2	3	3	3	9	4	2	3	2	2	2	1	2	4	0	1	0	3	3	1	2	3	0	0	0	0	0	0	0	0	17	2	4	2	2	2	4	2	18	9	9
40101012000	1	1	19	1	5	1	1	0	8	3	3	3	9	4	4	1	3	3	1	0	2	3	0	1	0	2	1	1	2	1	0	0	1	0	0	0	0	0	12	4	2	2	3	2	2	1	16	9	9
40101013000	1	0	4	1	3	0	1	0	5	3	2	3	8	3	2	2	4	1	1	0	2	1	0	0	0	5	2	1	2	1	0	1	0	0	0	0	0	1	14	3	2	3	3	3	4	3	21	7	8
40101014000	1	1	15	1	4	1	1	0	7	3	3	2	8	4	2	1	2	3	1	0	2	2	0	0	0	1	2	1	1	2	0	1	1	0	0	0	0	0	11	4	2	2	3	3	2	1	17	7	8
40101015010	1	0	2	0	2	0	0	0	2	2	2	3	7	3	3	3	2	3	2	0	1	2	0	0	0	2	1	1	1	2	0	0	1	0	0	0	0	0	10	3	3	3	1	3	1	1	15	9	8
40101016000	0	1	3	1	5	1	1	0	8	5	5	3	13	5	3	4	2	4	1	0	2	2	0	0	0	4	1	1	1	1	1	1	0	0	0	0	0	1	13	5	2	2	2	2	4	1	18	12	9
40101018000	0	1	16	1	5	1	0	0	7	4	3	2	9	1	1	2	1	1	1	0	1	1	0	0	1	3	2	1	1	1	0	1	0	0	0	1	0	0	12	4	3	1	3	1	3	1	16	4	4
40101020000	1	1	6	0	1	1	0	1	3	3	3	4	10	3	4	4	3	1	1	0	2	1	0	0	0	1	5	2	1	1	0	1	1	0	0	0	0	0	13	6	3	2	2	3	1	1	18	11	7
40101021010	1	1	3	1	1	1	1	0	4	1	3	2	6	3	3	3	1	1	1	0	1	1	0	0	0	1	1	1	1	1	0	1	0	0	0	0	0	0	7	2	1	1	1	2	2	1	10	9	4
40101022000	1	1	3	1	1	1	0	0	3	3	3	2	8	4	1	2	2	1	1	0	1	1	0	0	0	5	1	1	1	5	1	1	1	0	0	0	0	0	17	4	3	2	2	2	2	1	16	7	5
40101023010	1	0	4	1	3	1	1	0	6	2	2	2	6	2	2	3	2	3	1	0	2	1	0	0	0	1	2	1	1	1	0	0	0	0	0	0	0	0	7	5	2	1	1	2	2	1	14	7	8
40101024010	1	1	5	0	3	1	0	1	5	3	3	3	9	4	3	2	2	5	1	0	1	1	0	1	1	2	4	1	1	1	0	1	0	0	0	0	0	0	13	5	2	1	1	2	2	1	14	9	9
40101025010	0	0	2	0	5	1	0	1	7	3	3	3	9	3	3	3	1	1	1	0	1	1	0	0	0	1	1	1	1	2	0	1	0	0	0	0	0	0	8	6	3	2	1	1	1	1	15	9	4
40101026010	1	1	10	1	6	1	1	1	10	3	4	4	11	3	1	3	2	2	1	0	1	1	0	0	0	2	2	1	1	1	1	1	1	0	0	0	0	1	12	4	2	2	1	3	2	1	15	7	6
40101027010	1	0	5	1	6	0	1	0	8	3	3	3	9	1	3	1	1	3	1	0	1	1	0	1	0	1	2	1	1	1	0	0	0	0	0	0	0	0	8	5	2	1	2	1	2	1	14	5	6
40101031000	1	0	5	1	3	1	1	0	6	3	4	4	11	4	3	4	2	5	1	0	1	1	0	0	0	5	1	1	1	1	0	0	1	0	0	0	0	0	11	5	3	1	2	3	3	1	18	11	9
40101032000	1	0	1	1	2	1	1	0	5	3	3	3	9	3	2	3	1	2	2	0	2	1	0	0	0	1	1	1	1	1	0	0	1	0	0	0	0	0	7	2	1	1	1	2	2	1	10	8	7
40101033010	0	0	5	1	1	0	1	0	3	1	1	2	4	1	1	1	1	1	1	0	1	1	0	0	0	1	1	1	1	1	0	0	0	0	0	0	0	0	6	2	1	1	2	2	1	1	10	3	4
40101035010	1	1	4	0	2	1	0	1	4	3	3	3	9	4	3	1	2	2	1	0	2	1	0	0	1	1	1	1	1	1	0	0	1	0	0	0	0	0	8	4	3	2	3	1	1	1	15	8	7
40101036010	0	0	3	1	2	1	1	0	5	3	3	3	9	5	5	5	2	1	1	0	1	2	0	0	0	2	1	1	1	1	1	1	0	0	0	0	1	1	12	4	2	1	2	2	1	1	13	15	5
40101037000	1	1	7	1	6	1	1	1	10	3	4	4	11	1	3	3	3	2	1	0	2	3	0	0	0	1	1	1	3	1	0	1	0	0	0	0	0	0	11	5	3	1	1	3	6	1	20	7	8
40101040010	0	0	6	0	0	1	0	0	1	3	1	3	7	4	2	4	1	3	1	1	1	1	0	0	0	2	2	1	1	2	0	0	1	0	0	0	0	1	11	4	3	1	2	1	4	1	16	10	7
40101041000	0	0	4	1	3	1	1	1	7	3	4	4	11	5	4	4	1	1	1	0	1	1	0	0	0	2	1	1	1	1	0	0	0	0	0	0	0	0	7	5	3	2	2	3	4	1	20	13	4
40101042000	1	0	4	1	6	1	1	0	9	1	2	3	6	1	3	3	3	1	1	0	1	1	0	0	0	1	1	1	2	1	0	0	0	0	0	0	0	0	7	6	3	1	5	5	6	1	27	7	6
40101047000	0	0	5	1	7	1	1	1	11	3	3	3	9	3	2	2	1	1	1	0	1	1	0	0	0	1	1	1	1	1	0	0	0	0	0	0	0	0	6	5	3	1	2	3	6	2	22	7	4
40101048000	0	1	4	1	6	1	1	1	10	4	4	4	12	4	2	2	1	1	1	0	1	1	0	1	1	1	1	1	1	1	0	0	0	0	0	0	0	0	8	3	2	1	2	1	3	1	13	8	4
40101049010	1	1	1	1	6	1	1	1	10	2	3	2	7	4	4	4	1	3	1	0	1	1	0	1	0	1	1	1	1	1	0	1	1	0	0	0	0	0	9	5	2	1	2	1	1	1	13	12	6
40101050010	1	0	2	1	2	0	1	1	5	2	2	4	8	1	2	2	1	1	1	0	1	1	0	0	0	2	1	1	1	1	0	1	1	0	0	0	0	0	9	2	2	1	1	2	2	1	11	5	4
40101054000	1	1	5	1	3	1	1	0	6	2	3	2	7	4	4	2	1	1	1	0	1	1	0	0	1	5	1	1	1	1	0	0	0	0	0	0	0	0	11	6	4	1	2	3	1	1	18	10	4
40101055010	0	0	6	1	5	1	1	1	9	3	3	4	10	4	3	3	1	1	1	0	1	3	0	1	1	2	1	1	1	1	0	1	0	0	0	0	0	0	12	3	3	2	2	1	6	1	18	10	4
40101056010	1	1	7	1	5	1	0	1	8	3	3	3	9	4	2	2	1	1	1	0	1	1	0	0	0	1	1	1	1	1	1	0	0	0	0	0	0	0	7	6	3	1	6	2	3	1	22	8	4
40101059000	1	1	1	1	4	1	1	0	7	2	2	2	6	3	2	4	3	4	1	0	1	1	0	0	0	1	1	1	1	1	0	1	0	0	0	0	0	0	7	2	2	1	2	2	1	2	12	9	9
40101060010	1	0	6	0	2	1	1	1	5	3	3	3	9	3	1	3	1	1	1	0	1	1	0	1	0	5	1	1	1	4	0	0	0	0	0	0	0	0	14	5	2	1	1	3	1	1	14	7	4
40101062010	1	1	6	1	4	1	1	0	7	2	3	3	8	4	2	3	1	1	1	0	1	1	0	1	0	5	1	1	1	1	0	1	1	0	0	0	0	0	13	6	3	1	3	1	6	1	21	9	4
40101064000	1	0	14	1	5	1	1	1	9	4	4	4	12	3	5	2	2	5	1	0	1	2	0	1	1	5	5	1	1	4	0	1	1	0	0	0	0	1	23	5	4	1	1	5	3	1	20	10	9
40101001014-20803-20804-20805-20806	0	0	#NULL!	1	3	0	0	0	4	3	3	3	9	2	2	1	1	1	1	0	1	1	0	0	0	1	1	1	1	1	0	0	0	0	0	0	0	0	6	6	3	1	2	2	4	1	19	5	4
40101002001-22503	1	1	6	1	0	1	1	0	3	3	3	3	9	3	3	3	2	4	2	0	2	2	0	0	0	2	1	1	1	1	0	0	1	0	0	0	0	0	9	5	2	1	2	2	2	1	15	9	10
40101003001-22306	1	1	5	0	1	0	1	1	3	2	2	1	5	1	4	4	3	1	1	0	3	1	0	0	0	2	1	1	1	1	0	0	0	0	0	0	0	0	7	4	2	2	1.92451	1	6	1	17.9245	9	8
40101005001-10007	1	1	20	1	6	1	1	0	9	1	1	1	3	1	1	2	1	1	1	0	1	1	0	0	1	5	1	1	1	1	0	1	1	0	0	0	0	1	14	6	3	1	1	2	3	1	17	4	4
40101009002-22302-22503	1	0	1	0	0	0	0	0	0	3	3	3	9	3	3	3	2	2	2	1	2	2	0	1	0	1	2	1	1	1	0	1	1	0	0	0	0	0	11	2	3	3	2	2	6	2	20	9	9
40101011011-21606	1	0	2	1	1	1	1	0	4	4	3	5	12	5	5	1	1	2	1	0	1	1	0	1	1	5	3	1	1	1	0	1	1	0	0	0	0	0	16	6	2	1	1	4	6	1	21	11	5
40101017001-22503	1	0	14	1	1	1	1	1	5	2	2	2	6	1	2	1	1	1	1	0	1	1	0	0	0	1	1	1	1	1	0	0	0	0	0	0	0	0	6	5	2	3	2	1	2	1	16	4	4
40101019001-22503	1	1	7	1	4	1	1	1	8	2	3	4	9	4	2	1	2	1	2	0	3	1	0	1	0	4	1	1	2	5	1	1	1	0	0	0	0	1	19	4	3	1	4	2	5	1	20	7	8
40101028002-21606-22503	0	1	4	1	7	1	1	1	11	3	5	4	12	3	2	2	3	2	2	1	3	3	0	1	1	2	5	1	2	2	1	1	1	0	0	0	0	1	21	5	4	2	3	3	6	3	26	7	11
40101029001-22503	0	1	3	1	2	1	1	1	6	3	3	2	8	3	4	3	3	4	2	1	1	1	0	0	0	2	3	1	1	1	0	0	1	0	0	0	0	0	10	4	3	5	4	5	5	3	29	10	11
40101030011-22503	1	1	6	1	6	1	1	0	9	1	1	1	3	1	1	1	1	1	1	0	1	1	0	0	0	1	2	1	1	2	0	0	0	1	0	0	0	0	9	4	1	1	1	1	1	1	10	3	4
40101034011-10007	0	0	4	1	5	0	1	0	7	1	1	2	4	1	1	4	1	1	1	0	1	1	0	0	0	5	1	1	1	1	0	0	0	0	0	0	0	0	10	6	3	1	1	1	1	1	14	6	4
40101038001-51202	1	1	5	1	6	1	1	1	10	3	3	3	9	3	3	3	2	1	1	0	1	1	0	0	0	5	1	1	1	1	0	0	1	0	0	0	0	1	12	6	3	1	6	6	3	1	26	9	5
40101039012-20603-22503	0	0	5	1	0	1	0	0	2	2	2	3	7	4	4	3	1	1	1	0	1	2	0	0	0	1	1	1	1	1	0	0	0	0	0	0	0	0	7	3	2	1	1	1	3	1	12	11	4
40101043013-22503-22504-22505	0	0	4	1	2	1	1	0	5	3	3	3	9	4	3	3	1	1	1	0	1	1	0	0	0	1	1	1	1	1	0	0	0	0	0	0	0	0	6	6	3	3	4	2	5	2	25	10	4
40101044011-22503	1	0	5	0	0	0	1	0	1	1	1	3	5	3	4	4	1	1	1	0	1	1	0	0	0	3	1	1	1	1	0	1	1	0	0	0	0	0	10	3	2	1	1	2	2	1	12	11	4
40101045001-22503	0	0	3	1	2	1	1	0	5	3	4	3	10	3	1	2	1	1	1	0	1	1	0	0	0	1	1	1	1	1	0	0	0	0	0	0	0	0	6	6	4	1	2	1	6	1	21	6	4
40101046011-22305	0	1	3	0	0	1	1	0	2	3	3	3	9	3	3	3	3	3	3	0	1	3	0	0	0	3	3	2	2	2	1	1	1	1	0	0	1	1	21	3	1	2.25964	6	2	2	1	17.2596	9	10
40101051103-10009-21606-22506	1	0	#NULL!	1	2	1	0	0	4	3	3	3	9	3	1	1	1	1	1	0	1	1	0	0	0	1	1	1	1	1	0	1	0	0	0	0	0	0	7	2	1	1	1	2	2	1	10	5	4
40101052001-21606	1	0	6	1	2	1	1	1	6	3	1	3	7	4	1	3	1	1	1	0	1	1	0	0	0	3	2	1	1	1	0	0	0	0	0	0	0	0	9	3	2	2	1	1	1	1	11	8	4
40101053001-22806	1	1	3	1	2	0	1	0	4	3	3	3	9	4	3	3	3	3	2	0	2	2	1	1	1	2	2.44523	2	2	2	0	1	1	0	0	0	0	0	17.4452	3	3	6	3	3	5	3	26	10	10
40101057011-10002	0	#NULL!	6	1	3	1	1	1	7	2	3	3	8	4	4	5	1	1	1	0	1	1	0	0	1	3	1	1	1	1	0	0	0	0	0	0	0	0	9	3	3	3	1	1	3	1	15	13	4
40101058011-22503	1	1	14	1	0	1	1	0	3	3	3	3	9	1	3	1	1	1	1	0	1	1	0	0	1	2	1	1	3	3	0	1	1	0	0	0	0	0	14	4	3	1	1	1	3.36878	1	14.3688	5	4
40101061002-10007-22503	1	1	4	0	3	0	1	0	4	3	2	2	7	4	4	3	2	2	2	1	2	1	1	0	0	3	2	1	2	2	0	0	1	0	0	0	0	1	14	5	2	2	1	2	4	1	17	11	9
40101063011-10009	1	1	#NULL!	1	2	1	1	0	5	2	3	3	8	3	1	2	1	3	1	0	1	1	0	0	0	3	3	1	1	1	0	1	1	0	0	0	0	1	13	6	4	1	2	2	5	2	22	6	6
40101065001-10007	1	1	7	0	0	1	1	0	2	1	1	2	4	3	3	4	3	5	1	0	3	1	0	0	0	3	1	1	1	2	0	1	1	0	0	0	0	1	12	2	2	2	1	3	2	1	13	10	12
40101066001-10007	1	1	5	0	3	1	1	0	5	2	2	3	7	2	1	1	1	5	1	0	3	1	0	0	0	2	1	1	1	1	0	1	0	0	0	0	0	0	8	5	2	1	2	2	2	1	15	4	10
31110001000	0	0	6	1	2	0	0	0	3	3	3	4	10	5	3	5	4	3	1	0	2	2	0	0	0	3	2	1	2	1	0	1	1	0	0	0	0	1	14	6	5	1	4	5	5	1	27	13	10
31110002000	0	0	7	1	1	0	1	0	3	2	3	3	8	4	5	5	1	1	1	0	1	2	0	0	0	1	1	1	1	2	0	0	0	0	0	0	0	1	9	2	2	2	2	2	4	2	16	14	4
31110003000	0	0	3	1	2	1	1	1	6	3	3	3	9	3	3	3	2	1	1	0	1	1	0	0	0	1	2	1	1	1	0	1	1	0	0	0	0	0	9	5	2	1	2	2	4	1	17	9	5
31110004001-22503	0	0	4	1	3	1	0	0	5	3	3	3	9	4	1	1	3	2	3	0	1	1	0	0	0	3	2	1	1	1	0	1	1	0	0	0	0	0	11	4	3	1	2	2	2	2	16	6	9
31110005010	0	0	12	1	0	1	0	0	2	1	3	2	6	1	4	4	2	1	1	0	1	1	0	1	1	2	1	1	2	1	0	1	1	0	0	0	0	0	12	5	3	2	2	2	1	1	16	9	5
31110006010	0	0	13	1	3	1	1	1	7	2	1	1	4	1	1	1	2	2	2	0	1	1	0	0	0	2	1	1	1	1	0	0	1	0	0	0	0	0	8	5	3	1	2	2	1	2	16	3	7
31110007000	0	0	7	1	7	0	1	0	9	3	2	3	8	4	5	3	3	3	2	0	1	1	0	1	1	3	1	1	1	1	0	1	0	0	0	0	0	0	11	4	2	2	1	3	1	1	14	12	9
31110008000	1	0	10	1	0	1	0	0	2	1	1	2	4	1	3	1	3	1	1	0	1	1	0	0	1	1	1	1	1	1	0	1	0	0	0	0	0	0	8	6	3	2	1	1	1	1	15	5	6
31110009000	0	0	5	0	0	0	0	0	0	3	3	3	9	3	2	2	4	5	1	0	1	1	0	0	0	3	2	1	1	3	0	1	1	0	0	0	0	1	14	5	2	1	3	4	4	1	20	7	11
31110010000	0	0	6	1	6	1	1	0	9	1	3	3	7	3	3	4	1	1	1	0	1	1	0	0	0	2	1	1	1	1	0	0	0	0	0	0	0	0	7	6	4	2	2	2	1	1	18	10	4
31110011000	0	0	4	1	5	1	1	1	9	4	4	3	11	4	3	4	2	1	1	0	1	1	0	0	1	1	1	1	1	2	0	1	1	0	0	0	0	1	11	5	5	3	1	2	5	1	22	11	5
31110012000	0	0	#NULL!	1	3	1	1	0	6	3	3	2	8	4	3	5	3	1	2	0	5	2	0	0	0	2	1	1	1	5	0	1	0	0	0	0	0	0	13	6	4	4	3	2	2	2	23	12	11
31110013100	0	0	2	1	0	1	1	0	3	3	3	2	8	3	3	3	1	5	2	0	1	2	0	1	0	5	1	1	1	1	0	0	0	1	0	0	0	0	13	5	3	2	3	5	4	6	28	9	9
31110014000	1	0	9	0	2	1	1	0	4	3	4	2	9	4	2	3	2	1	1	0	1	1	0	0	0	3	2	1	1	2	0	0	1	0	0	0	0	0	11	6	3	1	1	1	1	1	14	9	5
31110015000	0	0	4	1	1	1	1	0	4	1	2	2	5	1	2	2	3	1	1	0	1	1	0	0	0	2	1	1	1	1	0	1	0	0	0	0	0	1	9	3	2	1	2	2	2	2	14	5	6
31110016000	1	0	10	0	0	0	0	0	0	5	5	4	14	5	2	1	2	3	1	0	1	1	0	0	0	3	2	1	1	1	0	1	1	0	0	0	0	0	11	4	2	1	2	2	2	1	14	8	7
31110017000	0	0	20	0	0	0	1	0	1	1	1	1	3	5	2	5	4	3	3	1	3	3	0	0	0	2	2	1	4	1	0	1	1	0	0	0	0	1	16	6	3	1	1	1	1	1	14	12	14
31110018000	1	1	4	0	0	0	0	0	0	3	2	4	9	1	3	3	4	5	1	0	1	1	0	0	1	3	2	1	1	1	0	0	0	0	0	0	1	1	12	4	2	1	2	1	4	1	15	7	11
31110019000	0	0	7	1	0	1	0	0	2	2	3	3	8	3	4	2	3	3	1	0	1	3	0	1	0	2	2	1	1	2	1	1	1	0	0	0	0	0	15	5	3	3	2	2	6	2	23	9	8
31110020000	0	0	5	1	2	1	0	0	4	2	3	2	7	5	2	1	1	1	1	0	1	1	0	0	1	1	1	1	1	3	0	0	0	0	0	0	0	0	9	6	2	1	2	1	1	1	14	8	4
31110021000	1	0	10	0	0	0	0	0	0	3	4	2	9	4	2	5	3	4	1	0	5	2	0	0	1	5	4	1	1	3	1	1	1	0	0	0	0	1	21	4	2	2	2	3	2	2	17	11	13
31110022000	1	0	1	1	2	1	1	0	5	4	4	4	12	5	4	4	1	1	1	0	1	3	0	1	0	1	1	1	1	1	0	0	0	0	0	0	0	0	9	5	4	1	2	1	2	2	17	13	4
31110023000	0	0	7	1	5	1	1	0	8	3	4	4	11	4	1	1	1	3	1	0	1	1	0	0	0	3	1	1	1	1	0	0	1	0	0	0	0	0	9	6	4	2	4	2	6	1	25	6	6
31110024000	1	0	15	1	0	0	0	0	1	3	3	3	9	3	2	4	2	2	1	0	1	1	0	0	0	3	1	1	1	2	0	1	0	0	0	0	0	1	11	3	1	2	1	4	3	1	15	9	6
31110025000	0	0	20	1	7	1	1	0	10	3	4	3	10	4	3	1	3	5	3	0	4	2	1	1	1	5	3	1	1	3	0	1	1	0	0	0	0	1	21	6	4	2	3	6	5	1	27	8	15
31110026000	0	0	20	0	0	0	0	0	0	3	3	3	9	1	1	2	1	2	1	0	1	1	0	0	1	2	2	1	1	1	0	0	1	0	0	0	0	1	11	4	3	1	1	2	1	1	13	4	5
31110027010	0	0	10	1	7	1	1	0	10	4	4	5	13	5	3	1	1	1	1	0	1	1	0	1	0	1	1	1	1	1	0	0	0	0	0	0	0	0	7	6	3	1	3	1	1	1	16	9	4
31110029010	1	1	10	1	0	1	1	0	3	3	3	3	9	4	1	1	2	1	1	0	1	1	0	0	1	2	1	1	1	1	0	1	0	0	0	0	0	0	9	4	2	1	4	2	2	1	16	6	5
31110030000	1	0	2	1	7	1	1	1	11	3	4	4	11	5	2	3	2	1	1	0	1	1	0	1	0	2	1	1	1	1	0	0	1	0	0	0	0	1	10	5	3	1	3	2	5	1	20	10	5
31110031000	0	0	16	1	0	1	0	0	2	2	3	2	7	4	3	3	2	3	2	0	1	2	0	1	1	1	1	1	1	1	0	0	0	0	0	0	0	1	10	6	3	3	3	2	2	2	21	10	8
31110032000	0	0	7	1	7	1	1	0	10	2	3	3	8	1	1	2	2	1	2	0	1	2	0	1	1	3	1	1	1	1	0	1	0	0	0	0	0	0	12	5	2	1	1	2	3	1	15	4	6
31110034000	0	0	6	1	7	1	1	0	10	4	4	4	12	5	5	1	3	1	1	0	1	2	0	0	0	4	1	1	1	5	0	1	0	0	0	0	0	0	15	5	3	4	4	3	1	2	22	11	6
31110035000	1	0	16	1	5	1	1	1	9	2	1	3	6	3	1	2	1	1	1	0	1	1	0	0	0	1	1	1	1	1	0	0	0	0	0	0	0	0	6	2	1	1	1	1	1	1	8	6	4
31110036000	0	0	5	1	0	0	0	0	1	3	4	4	11	4	2	1	3	2	1	0	2	1	0	0	0	3	2	1	2	1	0	1	1	0	0	0	0	0	12	6	3	2	3	3	2	3	22	7	8
31110037000	0	0	1	1	0	1	0	0	2	4	3	2	9	1	1	1	2	3	1	0	1	1	0	0	1	2	1	1	1	1	0	1	0	0	0	0	0	0	9	4	1	1	1	1	1	1	10	3	7
31110038010	0	0	15	1	5	1	0	0	7	4	4	4	12	5	4	3	1	1	1	0	1	1	0	1	0	1	1	1	1	1	0	0	1	0	0	0	0	0	8	6	4	2	2	1	6	2	23	12	4
31110040000	1	0	4	1	0	1	1	0	3	1	1	1	3	3	1	1	2	2	1	0	1	1	0	1	0	1	2	1	2	1	0	0	1	0	0	0	0	0	10	3	2	1	3	4	1	3	17	5	6
31110041000	1	1	12	1	2	0	1	1	5	4	4	4	12	5	3	3	3	5	1	0	5	1	0	0	1	1	1	1	1	4	0	0	1	0	0	0	0	1	12	6	3	3	3	2	4	3	24	11	14
31110043000	0	0	5	0	0	0	0	0	0	3	3	2	8	5	2	2	2	1	1	0	1	1	0	0	0	1	2	1	1	1	0	1	0	0	0	0	0	1	9	6	2	3	2	2	2	1	18	9	5
31110044000	1	0	5	0	0	0	0	0	0	3	3	3	9	3	3	3	2	1	1	0	1	1	0	0	0	5	3	1	1	1	1	1	1	0	0	0	1	1	17	4	2	2	2	2	2	3	17	9	5
31110046000	0	0	6	0	0	0	0	0	0	3	3	2	8	3	1	1	1	5	1	0	4	2	0	0	1	1	1	1	1	1	0	1	1	0	0	0	0	1	11	4	3	2	2	3	4	1	19	5	11
31110048000	0	0	14	1	0	1	0	0	2	3	3	4	10	4	3	3	1	2	1	0	1	2	0	0	0	1	2	1	1	3	0	1	1	0	0	0	0	1	13	6	3	1	3	2	3	1	19	10	5
31110049000	1	0	8	1	0	0	1	0	2	2	2	2	6	3	2	3	1	3	1	0	1	1	0	0	0	1	1	1	1	1	0	1	0	0	0	0	0	0	7	4	2	1	1	2	3	1	14	8	6
31110050000	1	0	2	1	7	1	1	0	10	3	3	3	9	4	3	3	2	5	1	0	1	1	0	1	1	1	1	1	1	1	0	0	0	0	0	0	0	0	8	5	3	3	3	2	2	1	19	10	9
31110054000	1	0	8	1	0	0	0	0	1	2	3	2	7	3	3	3	2	1	1	0	1	1	0	0	0	2	1	1	1	1	0	0	1	0	0	0	0	0	8	5	3	3	2	3	2	2	20	9	5
31110057000	1	0	3	1	0	1	0	0	2	2	1	2	5	3	1	1	1	2	1	0	2	1	0	1	1	1	1	1	1	2	0	1	1	0	0	0	0	0	11	2	1	1	1	2	2	1	10	5	6
31110059015-22502-22503-22504-22505-22506	1	0	1	0	2	1	1	0	4	2	3	3	8	3	2	2	2	1	1	0	1	2	0	0	0	2	3	1	1	1	1	1	0	0	0	0	0	0	12	5	2	1	2	2	3	2	17	7	5
31110060000	1	0	11	0	2	1	1	0	4	1	2	2	5	3	3	3	3	3	2	0	1	1	0	0	0	2	1	1	1	1	0	1	0	0	0	0	0	1	9	4	3	2	3	3	2	1	18	9	9
31110061000	0	0	2	1	3	1	1	0	6	3	3	3	9	3	4	3	3	5	2	0	1	1	0	1	1	5	2	1	1	3	0	1	1	0	0	0	0	1	18	4	2	3	2	5	2	2	20	10	11
31110064000	1	0	10	0	0	1	0	0	1	3	3	3	9	4	3	3	1	1	1	1	1	1	0	0	1	1	1	2	1	1	0	0	0	0	0	0	0	1	9	3	2	1	1	2	2	1	12	10	5
31110066000	0	0	2	1	0	0	0	0	1	3	3	3	9	3	3	3	3	1	1	0	1	1	0	1	1	5	1	1	1	1	0	0	1	0	0	0	0	0	13	4	4	1	2	3	5	2	21	9	6
31110067000	1	0	7	1	4	1	1	1	8	1	1	1	3	3	1	1	2	1	1	0	1	1	0	0	0	2	1	1	1	1	0	0	0	0	0	0	0	0	7	6	3	2	2	2	1	1	17	5	5
31110070000	1	1	20	1	4	0	1	0	6	3	3	3	9	4	2	2	2	1	1	0	1	1	1	1	1	1	2	1	1	1	0	0	0	0	0	0	0	1	11	3	3	1	1	2	4	1	15	8	5
31110071000	0	0	3	1	6	1	0	0	8	3	4	4	11	4	3	3	4	2	1	0	1	1	0	0	0	1	1	1	1	5	0	1	0	0	0	0	0	0	11	6	5	4	4	1	2	3	25	10	8
31110073000	0	0	6	1	7	1	1	1	11	3	3	3	9	3	3	3	3	1	1	0	2	1	0	1	0	1	1	1	1	1	0	0	0	0	0	0	0	0	7	4	3	4	3	3	3	1	21	9	7
31110074000	1	0	5	1	1	1	1	0	4	2	2	2	6	3	3	3	1	1	1	0	2	1	0	0	0	1	1	1	1	2	0	0	1	0	0	0	0	0	8	4	3	1	2	1	1	1	13	9	5
31110075000	1	0	2	1	0	1	0	0	2	3	3	3	9	4	2	5	2	1	1	1	1	1	0	0	0	2	2	1	1	2	0	1	1	0	0	0	0	1	12	3	2	1	1	2	2	1	12	11	6
31110076000	1	0	14	0	0	0	0	0	0	3	3	3	9	1	2	1	2	3	1	0	2	1	0	1	0	5	1	1	2	2	0	1	0	0	0	0	0	1	15	4	3	1	2	3	2	1	16	4	8
31110077001-22503	0	0	2	0	0	0	0	0	0	1	1	1	3	3	3	1	1	2	1	0	1	1	0	0	1	2	2	1	1	1	0	0	1	0	0	0	0	0	10	2	1	1	1	2	1	1	9	7	5
31110078000	0	0	2	1	3	1	1	0	6	3	3	3	9	1	1	2	2	1	1	0	1	2	0	1	0	2	1	1	1	1	0	1	0	0	0	0	0	0	10	5	4	1	2	2	5	2	21	4	5
31110080000	0	0	1	1	0	1	1	0	3	2	3	3	8	5	2	3	2	4	1	0	2	2	1	0	0	3	4	1	2	1	0	1	1	0	0	0	0	1	17	5	2	1	3	3	1	3	18	10	9
31110082000	1	0	6	0	1	0	0	0	1	3	3	3	9	3	3	2	3	2	1	0	1	1	0	1	1	3	1	1	1	1	0	0	1	0	0	0	0	1	12	6	3	1	4	2	2	1	19	8	7
31110083000	0	0	9	1	3	1	1	1	7	5	5	4	14	3	4	4	4	3	3	0	1	3	1	1	0	2	1	1	1	2	0	0	1	0	0	1	0	1	15	5	3	4	4	2	3	5	26	11	11
31110084000	0	0	3	1	7	1	1	0	10	3	4	3	10	3	1	4	1	2	1	0	1	1	0	0	0	2	1	1	1	1	1	1	0	0	0	0	1	1	11	3	4	1	2	3	3	1	17	8	5
31110085000	0	0	6	0	0	0	0	0	0	3	3	3	9	4	2	3	3	1	1	0	1	1	0	1	0	3	1	1	1	1	0	1	1	0	0	0	0	0	11	6	3	2	3	1	4	2	21	9	6
31110086000	0	0	20	1	0	1	1	0	3	3	4	3	10	1	4	4	1	1	1	0	1	1	0	0	1	2	2	1	1	4	0	1	0	0	0	0	0	1	14	5	3	1	1	3	1	1	15	9	4
31110087000	1	0	1	0	0	0	0	0	0	3	3	3	9	3	1	2	1	1	1	0	1	2	1	1	0	1	1	1	1	1	0	1	0	0	0	0	0	1	11	4	2	1	2	2	4	2	17	6	4
31110089010	0	0	3	0	0	0	0	0	0	5	5	5	15	5	5	5	1	1	1	0	1	1	1	1	0	2	3	2	2	2	0	1	0	0	0	0	0	1	16	2	1	1	1	2	3	1	11	15	4
31110091000	0	0	8	1	2	1	1	1	6	3	3	2	8	4	1	1	1	1	1	0	3	1	0	1	0	2	3	1	1	1	0	1	1	0	0	0	0	0	12	6	3	2	4	4	1	1	21	6	6
31110092000	0	0	11	1	2	1	0	0	4	3	3	2	8	3	4	4	1	3	2	0	2	1	0	0	0	4	4	1	1	1	0	0	0	0	0	0	0	0	12	5	2	1	2	2	2	1	15	11	8
31110093010	0	0	7	1	3	1	1	0	6	3	3	4	10	5	3	1	1	2	1	0	1	1	0	0	1	1	1	1	1	1	0	1	1	0	0	0	0	0	9	6	2	1	1	1	2	1	14	9	5
31110094000	0	0	20	1	5	1	1	0	8	2	1	2	5	2	1	2	1	1	1	0	1	1	0	0	0	1	2	1	1	1	0	1	0	0	0	0	0	0	8	4	2	1	1	1	2	1	12	5	4
31110096000	0	0	11	1	2	1	0	0	4	1	1	1	3	5	2	2	1	1	1	0	1	1	0	0	0	1	1	1	1	1	0	1	0	0	0	0	0	0	7	5	2	1	1	1	1	1	12	9	4
31110097010	0	0	3	1	4	0	0	0	5	3	3	3	9	4	3	4	1	1	1	0	1	1	0	0	0	2	1	1	1	1	0	1	0	0	0	0	0	0	8	6	3	1	3	3	6	1	23	11	4
31110099000	0	0	11	0	4	1	1	0	6	5	5	5	15	3	1	3	3	2	2	0	1	2	0	0	1	1	1	1	1	1	0	0	0	0	0	0	0	0	8	3	2	1	2	2	4	1	15	7	8
31110101000	0	0	16	1	7	1	1	1	11	5	5	3	13	4	4	2	2	1	1	0	1	1	0	0	0	1	1	1	1	1	0	0	0	0	0	0	0	0	6	6	5	4	4	4	1	4	28	10	5
31110102000	0	0	9	1	2	1	1	0	5	3	3	3	9	3	1	2	1	1	1	0	1	1	0	0	0	1	1	1	1	1	0	1	0	0	0	0	0	0	7	5	3	1	1	3	2	1	16	6	4
31110103000	1	0	7	1	0	0	1	0	2	3	4	3	10	3	4	3	2	1	1	0	4	1	0	1	0	1	1	1	1	2	0	1	1	0	0	0	0	1	11	6	3	4	3	2	2	1	21	10	8
31110104000	0	0	5	1	0	1	0	0	2	1	1	4	6	1	3	1	1	1	1	0	1	1	0	0	0	1	1	1	1	1	0	0	0	0	0	0	0	0	6	2	3	3	2	1	4	1	16	5	4
31110028001-20802	0	0	9	1	0	1	1	0	3	1	3	2	6	4	1	2	1	3	1	0	1	1	0	0	0	1	1	1	1	1	0	0	0	0	0	0	0	0	6	3	3	1	1	2	1	1	12	7	6
31110033001-22506	1	0	12	0	7	1	1	0	9	3	4	3	10	4	2	3	1	1	1	0	1	1	1	1	0	2	1	1	3	4	0	1	1	0	0	0	0	1	17	4	4	3	1	2	2	1	17	9	4
31110039005-21405-21406-21407-21408-21409	0	0	5	0	0	0	0	0	0	1	3	3	7	3	3	3	1	1	1	0	1	1	0	0	1	1	1	1	1	1	0	0	0	0	0	0	0	0	7	4	2	1	3	1	4	1	16	9	4
31110042014-22502-22503-22504-22505	0	0	4	0	0	0	0	0	0	2	2	2	6	1	5	5	1	2	1	0	1	1	0	1	0	1	1	1	1	1	0	1	1	0	0	0	0	0	9	5	3	4	1	1	4	1	19	11	5
31110045001-22506	0	0	#NULL!	0	0	0	0	0	0	2	2	2	6	4	3	2	1	1	1	0	1	1	0	1	1	1	1	1	1	1	0	0	0	0	0	0	0	0	8	3	3	1	2	2	1	1	13	9	4
31110047001-21606	1	0	8	1	4	1	1	1	8	3	5	4	12	3	4	4	1	1	1	0	1	1	0	0	1	2	1	1	1	3	0	0	0	0	0	0	0	0	10	3	5	1	2	1	4	1	17	11	4
31110051011-21606	0	0	11	0	0	0	0	0	0	2	3	2	7	1	1	1	2	1	1	0	1	1	0	0	0	1	5	1	1	1	0	0	1	0	0	0	0	0	11	3	2	1	2	2	6	2	18	3	5
31110052011-21606	0	0	5	1	0	1	1	0	3	1	1	1	3	1	1	1	2	4	1	0	1	1	0	1	1	2	1	1	1	1	0	1	1	0	0	0	0	1	12	6	2	1	4	4	3	1	21	3	8
31110053001-10007	0	0	5	1	7	1	1	1	11	4	5	5	14	4	5	5	3	3	2	0	3	2	0	0	0	5	1	1	2	2	0	1	1	0	0	0	0	1	16	6	4	2	3	3	2	2	22	14	11
31110055003-10009-21606-22506	1	0	#NULL!	0	1	1	1	0	3	3	3	3	9	3	3	3	1	1	1	0	1	1	0	0	0	1	1	1	1	1	0	0	0	0	0	0	0	0	6	5	4	1	5	5	2	5	27	9	4
31110056001-22506	1	0	#NULL!	1	2	1	1	0	5	1	1	1	3	3	3	1	1	1	1	0	1	1	0	0	0	3	1	1	1	1	0	1	1	0	0	0	0	1	11	5	2	1	1	2	1	1	13	7	4
31110058118-21606-22402-22403-22502-22503-22504-22505-22506	0	0	2	1	2	1	1	0	5	3	2	4	9	4	3	4	3	2	1	0	1	1	0	0	0	2	2	1	1	3	0	0	0	0	0	0	0	0	10	5	4	1	3	2	4	1	20	11	7
31110062001-20305	1	0	6	1	3	1	1	0	6	3	3	4	10	5	4	1	1	1	1	0	2	1	0	1	1	1	1	1	1	1	0	1	0	0	0	0	0	0	9	6	3	3	4	2	1	2	21	10	5
31110063015-22502-22503-22504-22505-22506	0	0	4	0	0	0	0	0	0	2	2	2	6	2	2	2	2	1	1	0	1	1	0	0	1	1	1	1	1	1	0	0	0	0	0	0	0	1	8	6	2	1	1	1	2	1	14	6	5
31110065006-20301-20303-22002-22003-22004-22005	1	0	11	1	2	0	1	0	4	1.48534	1	1.75416	4.23949	3	1	1	1	1	1	0	1	1	0	1	0	1	1	1	1	2	1	1	0	0	0	0	0	1	11	3	2	1	2	2	1	1	12	5	4
31110068012-20401-20402	1	1	20	0	0	0	0	0	0	2	2	1	5	2.18529	1.77104	1	2	2	1	0	1	1	0	0	1	3	1	1	1	1	0	0	0	0	0	0	0	0	9	2	1	1	1	1	1	1	8	4.95632	6
31110069001-21606	0	0	20	1	0	1	0	0	2	3	2	2	7	3	2	1	1	1	1	0	1	1	0	1	1	2	1	1	1	1	1	1	1	0	0	0	1	1	14	5	4	3	1	1	2	1	17	6	4
31110072001-22506	0	0	5	1	0	0	0	1	2	4	4	3	11	4	4	4	3	1	1	0	1	2	0	1	0	5	1	1	1	1	0	1	1	0	0	0	0	0	14	5	3	2	2	4	3	2	21	12	6
31110079003-10007-21408-21409	0	0	11	1	6	1	1	0	9	5	4	3	12	2	3	4	2	3	1	0	2	1	0	1	1	1	1	1	1	1	0	0	0	0	0	0	0	0	8	6	4	1	6	2	3	1	23	9	8
31110081003-22504-22505-22506	0	0	3	1	0	1	0	0	2	4	4	2	10	3	1	3	1	1	1	0	1	1	0	0	0	2	1	1	1	3	0	0	0	0	0	0	0	1	10	6	3	1	3	2	3	1	19	7	4
31110088011-21606	0	0	12	1	0	1	1	0	3	1	1	1	3	3	2	1	2	1	1	0	1	1	0	0	0	1	1	1	1	1	0	0	0	0	0	0	0	0	6	6	3	1	1	1	1	1	14	6	5
31110090101-21606	0	1	2	1	2	1	0	0	4	2	3	3	8	4	3	4	1	3	1	0	1	1	0	0	0	3	1	1	1	1	0	0	0	0	0	0	0	0	8	6	2	4	3	3	1	4	23	11	6
31110095001-10007	0	0	6	1	7	1	1	0	10	5	5	5	15	3	4	4	2	2	2	0	1	3	0	0	0	2	1	1	1	1	0	0	1	0	0	1	0	1	12	4	2	3	4	3	1	2	19	11	7
31110098011-20803	0	0	14	1	2	1	1	0	5	1	1	1	3	3	2	3	3	2	1	0	1	1	0	0	0	1	1	1	1	2	0	0	0	0	0	0	0	0	7	2	2	1	1	1	2	1	10	8	7
31110100101-21606	0	0	11	0	0	0	0	0	0	3	4	3	10	3	3	4	1	3	1	0	1	1	0	0	1	1	1	1	1	1	0	1	0	0	0	0	0	0	8	6	3	2	1	1	2	1	16	10	6
31120001000	0	0	6	0	1	0	1	0	2	2	2	4	8	2	3	3	1	1	1	1	1	1	0	0	0	2	1	1	1	1	0	1	0	0	0	0	0	1	9	3	2	1	1	2	2	1	12	8	5
31120002000	1	0	6	1	3	0	0	0	4	3	3	3	9	3	5	5	1	5	1	0	1	1	0	0	1	3	1	1	1	1	0	1	1	0	0	0	0	1	12	5	3	2	2	2	2	1	17	13	8
31120003000	1	0	10	1	4	1	0	0	6	1	1	2	4	1	1	2	1	1	1	1	1	2	0	1	1	3	2	1	2	5	0	1	1	0	0	0	0	1	20	4	2	1	1	3	6	1	18	4	5
31120005010	1	0	20	1	0	0	0	0	1	2	2	1	5	1	1	1	1	1	2	0	1	1	0	0	1	1	5	1	1	1	0	0	0	0	0	0	0	1	12	2	1	1	1	2	3	1	11	3	5
31120006010	0	0	5	0	6	1	1	0	8	1	3	1	5	3	2	4	1	1	1	0	1	1	0	0	0	1	1	1	1	1	0	0	1	0	0	0	0	1	8	5	3	1	1	1	2	1	14	9	4
31120007000	1	0	13	0	2	1	1	0	4	3	4	4	11	4	4	1	1	5	1	0	1	1	0	0	1	1	1	1	1	1	0	0	0	0	0	0	0	1	8	4	2	3	2	1	1	1	14	9	8
31120008000	0	0	7	1	4	1	1	1	8	5	5	5	15	4	3	3	2	3	2	0	2	2	0	1	0	1	1	1	1	1	0	1	1	0	0	1	0	0	11	5	3	2	2	2	2	2	18	10	9
31120010000	0	0	11	1	7	1	1	0	10	4	4	4	12	3	1	4	1	2	1	1	1	1	0	0	0	1	1	1	1	5	0	0	0	0	0	0	0	0	10	6	2	6	1	1	2	3	21	8	6
31120011000	1	0	7	1	1	1	1	0	4	3	2	4	9	4	4	4	2	3	2	0	3	1	0	0	1	3	3	1	1	4	0	1	1	0	0	0	0	1	17	5	3	1	3	2	3	1	18	12	10
31120013000	1	0	7	1	0	1	1	1	4	4	4	4	12	4	3	3	2	1	2	0	1	1	0	0	0	1	1	1	1	2	0	0	1	0	0	0	0	0	8	5	3	2	2	1	2	1	16	10	6
31120014010	0	1	2	0	0	0	0	0	0	3	3	3	9	3	1	1	2	1	1	0	1	1	0	0	0	1	1	1	1	1	0	1	0	0	0	0	0	0	7	2	3	1	1	1	3	1	12	5	5
31120015000	1	0	4	0	0	0	1	0	1	2	3	2	7	2	2	2	2	1	1	0	1	1	0	1	1	5	1	1	1	1	0	1	1	0	0	0	0	1	15	6	5	6	3	2	4	2	28	6	5
31120016000	1	0	4	0	0	0	0	0	0	1	1	1	3	1	1	1	1	1	1	0	1	1	0	0	0	5	1	1	1	1	0	0	0	0	0	0	0	0	10	1	2	1	1	2	1	1	9	3	4
31120018000	1	0	4	0	0	0	0	0	0	3	4	5	12	4	3	3	1	1	1	0	1	1	0	1	1	4	1	1	1	1	0	0	1	0	0	0	0	1	13	2	2	1	2	4	1	1	13	10	4
31120019000	0	0	4	1	0	1	1	0	3	3	5	4	12	3	3	4	2	2	1	0.0470101	1	1	0	0	1	2	1	1	1	1	0	1	0	0	0	0	0	1	10	4	2	2	3	3	3	1	18	10	6.04701
31120021000	1	0	4	0	1	0	0	0	1	4	4	4	12	4	4	4	2	1	1	0	1	1	1	0	0	4	3	1	2	1	0	1	1	0	0	0	0	0	15	3	2	3	3	3	3	3	20	12	5
31120022000	0	0	4	1	0	1	1	0	3	2	3	3	8	3	2	3	3	2	1	0	1	1	0	0	0	1	1	1	1	1	0	1	1	0	0	0	0	1	9	5	4	1	2	2	2	1	17	8	7
31120024011-22503	0	0	5	1	0	1	1	0	3	3	4	4	11	3	3	3	2	1	1	0	1	2	0	0	0	3	1	1	1	1	0	0	1	0	0	0	0	0	10	6	3	1	1	1	4	1	17	9	5
31120025011-22503	1	0	3	0	2	1	1	1	5	3	2	2	7	3	2	2	3	2	2	0	1	2	0	1	1	1	1	2	2	1	0	1	1	0	0	0	0	1	14	5	4	5	5	3	3	5	30	7	8
31120027000	0	0	4	1	2	1	1	0	5	3	3	2	8	4	2	3	2	3	2	0	2	2	0	0	0	3	4	1	2	3	0	1	1	0	0	0	0	1	18	4	3	2	2	2	2	2	17	9	9
31120028000	1	0	10	0	4	0	1	0	5	3	2	4	9	4	2	1	3	5	1	0	1	1	0	1	0	2	1	1	1	3	0	1	1	0	0	0	0	1	13	4	2	1	1	3	3	1	15	7	10
31120029000	0	0	3	0	0	1	1	0	2	4	4	3	11	3	1	4	2	1	2	0	4	2	1	1	0	1	3	1	1	1	0	0	0	1	0	0	0	1	13	6	3	1	6	6	5	1	28	8	9
31120030010	1	0	7	1	2	0	1	0	4	2	1	3	6	4	3	5	2	1	1	0	1	2	0	0	0	5	3	1	1	1	1	1	1	0	0	1	0	1	18	4	2	1	4	3	2	1	17	12	5
31120032000	1	0	2	0	0	1	1	0	2	4	4	4	12	4	4	4	2	3	1	0	2	1	0	0	0	4	2	1	1	1	0	0	1	0	0	0	0	0	11	2	3	1	3	3	2	1	15	12	8
31120033000	1	0	13	0	3	1	1	0	5	4	4	4	12	4	4	4	2	1	1	0	1	1	0	0	0	2	1	1	1	1	0	1	1	0	0	0	0	1	10	5	3	1	2	1	5	1	18	12	5
31120034010	0	0	2	1	1	1	0	0	3	1	1	1	3	3	4	3	2	1	1	0	1	1	0	0	0	1	1	1	1	1	0	0	0	0	0	0	0	1	7	5	2	1	1	2	1	1	13	10	5
31120036000	0	0	8	0	0	0	0	0	0	3	4	3	10	4	2	4	3	3	2	0	1	3	0	0	0	3	2	1	1	1	0	1	1	0	0	0	0	1	14	5	3	3	2	2	3	1	19	10	9
31120038000	0	0	2	0	0	0	0	0	0	3	3	3	9	1	1	1	2	1	2	0	1	1	0	0	0	2	1	1	1	1	0	0	1	0	0	0	0	0	8	4	3	2	2	2	2	2	17	3	6
31120039000	1	1	7	0	2	0	0	0	2	3	3	3	9	3	3	3	1	1	1	0	1	1	0	0	0	2	5	1	1	1	0	0	1	0	0	0	0	0	12	2	1	1	2	2	1	1	10	9	4
31120040000	1	0	4	1	4	1	1	0	7	3	4	3	10	4	3	3	2	3	2	0	2	1	0	1	1	4	1	1	1	3	0	1	1	0	0	0	0	0	15	6	3	1	2	3	2	1	18	10	9
31120045010	0	0	8	0	0	1	1	0	2	3	3	3	9	2	2	1	1	1	1	0	1	1	0	0	0	1	1	1	1	1	0	1	1	0	0	0	0	1	9	6	3	2	1	2	1	1	16	5	4
31120046010	1	0	3	1	0	1	1	0	3	3	4	4	11	3	3	3	1	1	1	0	1	1	0	1	0	3	1	1	1	1	0	0	0	0	0	0	0	1	10	3	2	2	2	4	4	1	18	9	4
31120047010	0	0	7	1	2	1	1	0	5	3	1	4	8	3	3	2	1	1	1	0	3	1	0	0	0	1	2	1	1	1	0	1	0	0	0	0	0	0	8	5	2	1	2	1	3	1	15	8	6
31120048010	1	0	5	0	0	0	0	0	0	3	3	3	9	2	1	3	3	1	1	0	1	1	0	0	0	1	1	1	1	1	0	1	1	0	0	0	0	1	9	4	3	1	1	1	2	1	13	6	6
31120051010	0	0	20	1	7	1	1	1	11	3	3	3	9	4	3	3	1	2	1	0	2	2	0	1	1	1	1	1	1	1	0	0	1	0	0	0	0	1	11	5	4	1	5	1	6	1	23	10	6
31120054000	1	0	5	1	0	1	0	0	2	1	1	3	5	1	3	2	2	2	1	0	1	1	0	0	0	3	1	1	1	1	0	0	0	0	0	0	0	0	8	6	3	1	1	2	1	1	15	6	6
31120055000	1	0	18	0	1	1	1	0	3	3	3	3	9	4	4	4	1	1	1	0	1	2	0	0	1	2	1	1	1	1	0	1	0	0	0	0	0	1	11	4	2	2	1	3	2	1	15	12	4
31120056000	1	0	3	1	1	0	1	0	3	3	3	3	9	3	3	4	1	4	1	0	1	2	0	1	0	5	1	1	3	3	0	1	1	0	0	0	0	0	18	4	3	1	1	4	3	1	17	10	7
31120058110	0	0	9	1	3	1	0	0	5	2	2	3	7	2	3	1	2	1	2	0	1	2	0	0	1	2	1	1	2	1	0	1	1	0	0	0	0	0	12	2	2	5	2	3	2	6	22	6	6
31120060000	1	0	20	1	0	0	1	1	3	2	2	2	6	3	2	4	1	3	1	0	1	1	0	0	0	5	3	1	1	3	0	0	1	0	0	0	0	0	15	6	3	1	1	1	1	1	14	9	6
31120061000	0	0	10	1	1	1	0	0	3	3	4	3	10	3	4	3	2	2	3	1	1	2	0	0	1	2	1	1	1	1	0	0	0	0	0	0	0	0	9	4	4	4	4	1	1	1	19	10	9
31120062000	0	0	3	1	4	1	1	0	7	3	4	4	11	4	3	3	2	1	1	0	1	1	0	1	1	1	3	1	1	5	0	1	1	0	0	0	0	1	17	5	3	2	1	2	1	1	15	10	5
31120068000	1	1	3	1	0	1	1	0	3	2	3	3	8	4	3	3	2	3	1	0	1	1	0	1	0	4	2	1	1	2	0	0	1	0	0	0	0	1	14	4	2	2	3	3	4	1	19	10	7
31120004104-21403-21406-21409-21606	0	0	4	0	0	0	0	0	0	5	5	5	15	5	4	1	1	1	1	0	1	1	0	1	0	1	1	1	1	5	0	1	0	0	0	0	0	0	12	5	2	1	2	1	2	1	14	10	4
31120009003-10007-21701-21702	1	0	8	1	0	1	1	0	3	3	5	3	11	4	3	3	1	1	1	0	1	1	0	1	0	2	1	1	1	5	0	1	1	0	0	0	0	0	14	6	4	3	1	3	2	1	20	10	4
31120012103-20301-20302-20303	0	1	2	1	0	1	0	0	2	3.61893	3.85232	3.86704	11.3383	4	4	4	2	1	1	0	1	1	0	0	1	1	1	1	1	2	0	1	1	0	0	0	0	0	10	5	2	1	1	1	2	1	13	12	5
31120017002-22601-22602	0	0	5	1	7	1	0	1	10	5	5	5	15	5	4	4	1	1	1	0	1	1	0	0	0	1	1	1	1	1	0	0	0	0	0	0	0	0	6	6	5	1	1	1	1	1	16	13	4
31120020001-10007-22503	1	1	11	1	0	1	1	0	3	3	4	4	11	4	3	4	3	4	2	0	1	1	0	0	1	2	4	1	1	2	1	1	0	0	0	0	0	1	15	4	2	2	3	4	4	3	22	11	10
31120020002-10007-22503	1	1	11	1	0	1	1	0	3	3	4	4	11	4	3	4	3	4	2	0	1	1	0	0	1	2	4	1	1	1	1	1	0	0	0	0	0	1	14	4	2	2	3	4	4	3	22	11	10
31120023103-22402-22403-22503	0	0	5	1	2	0	1	0	4	3	3	2	8	4	5	3	1	3	1	0	1	1	0	0	0	3	1	1	1	1	0	1	1	0	0	0	0	1	11	6	3	2	4	3	2	1	21	12	6
31120026002-200805-200806	0	0	1	1	4	1	0	0	6	3	3	3	9	3	2	2	1	2	1	0	1	1	0	1	1	1	1	1	1	1	0	1	1	0	0	0	0	0	10	5	3	1	2	1	2	1	15	7	5
31120031001-22503	0	0	3	1	3	1	1	0	6	1	1	1	3	2	5	2	3	5	2	0	1	1	0	0	1	3	1	1	1	1	1	1	0	0	0	0	0	0	11	6	3	5	2	2	2	2	22	9	11
31120035011-22503	1	0	7	1	6	1	1	0	9	2	1	2	5	3	2	1	2	3	1	0	1	1	0	0	0	3	1	1	1	1	0	1	1	0	0	0	0	1	11	4	1	1	1	2	2	1	12	6	7
31120037010-22503	1	1	6	1	1	1	1	0	4	2	3	2	7	1	5	2	1	1	1	0	1	2	0	0	0	3	1	1	1	1	0	0	0	0	0	0	0	0	9	4	4	1	1	3	5	1	19	8	4
31120041002-10007-21606	1	0	2	1	0	1	1	0	3	1	1	1	3	3	2	1	1	1	1	0	1	1	0	0	1	2	1	1	1	1	0	0	0	0	0	0	0	0	8	4	1	1	1	2	1	1	11	6	4
31120042011-10007	0	0	8	1	4	1	1	1	8	2	2	2	6	1	3	3	2	1	1	0	1	2	0	0	0	5	1	1	1	1	0	0	0	0	0	0	0	0	11	4	2	2	2	2	1	2	15	7	5
31120043000-22503	0	0	10	1	2	1	1	0	5	2	2	2	6	5	2	3	3	3	2	0	1	1	0	0	1	4	2	1	1	1	0	1	0	0	0	0	0	1	13	5	3	2	1	3	3	1	18	10	9
31120044001-22503	0	0	8	0	2	1	1	0	4	1	2	2	5	3	2	4	2	1	1	0	2	2	1	1	1	1	1	1	1	1	0	1	0	0	0	0	0	1	12	6	4	2	5	2	2	1	22	9	6
31120049001-22503	0	0	5	1	7	1	0	0	9	2	3	2	7	5	3	3	1	3	1	0	1	1	0	0	1	1	1	1	1	1	0	1	0	0	0	0	0	1	9	6	4	2	4	1	6	1	24	11	6
31120050001-10005	0	1	12	1	1	1	1	0	4	3	3	4	10	3	2	4	2	2	1	0	1	1	0	0	0	2	1	1	1	1	0	1	0	0	0	0	0	1	9	5	4	3	3	2	1	3	21	9	6
31120052002-10007-22506	0	0	7	1	2	0	1	0	4	3	3	3	9	3	3	3	1	1	1	0	1	1	0	0	1	1	1	1	1	1	0	1	0	0	0	0	0	0	8	1	1	1	2	1	3	1	10	9	4
31120053001-21502	1	0	12	0	0	1	0	0	1	2	2	2	6	3	2	1	2	2	2	1	2	1	1	1	0	3	2	1	1	1	0	1	1	0	0	1	0	0	14	6	3	3	3	2	1	2	20	6	9
31120057001-22004	0	0	6	0	5	1	1	0	7	3	3	3	9	2	1	1	3	1	1	0	2	3	0	0	0	2	2	2	2	2	0	0	0	0	0	0	0	0	13	3	4	2	2	2	5	2	20	4	7
31120059001-10009	1	0	#NULL!	0	0	1	0	0	1	3	4	4	11	4	3	3	2	1	1	0	1	2	0	1	0	2	1	1	1	1	0	0	1	0	0	0	0	1	11	6	3	4	1	4	4	4	26	10	5
31120063012-10002-22506	1	#NULL!	2	1	1	1	1	1	5	4	3	3	10	4	3	3	2	3	3	1	2	3	1	1	1	3	2	2	2	1	0	1	1	0	0	0	0	1	19	3	4	4	2	2	2	2	19	10	11
31120064001-22506	1	1	2	0	0	0	1	0	1	3	3	2	8	3	3	2	3	3	1	0	1	1	0	0	1	5	3	1	1	3	0	1	1	0	0	0	1	0	18	2	3	2	2	3	3	3	18	8	8
31120065001-21403	1	1	6	0	0	1	1	0	2	2	3	1	6	2	5	3	1	1	1	0	1	1	0	0	0	1	1	1	1	1	1	1	1	1	1	1	1	1	14	2	1	2	2	5	1	2	15	10	4
31120066002-210007-10009	0	0	#NULL!	1	0	1	1	1	4	2	2	2	6	3	2	2	3	3	2	0	2	3	0	1	1	3	3	1	1	1	0	1	0	0	0	0	0	1	16	3	2	2	2	2	2	2	15	7	10
31120067004-10007-21203-22305-22309	0	0	8	1	5	1	1	0	8	1	3	1	5	1	1	1	1	1	1	0	1	1	0	0	0	1	1	1	1	1	0	0	0	0	0	0	0	0	6	1	2	0.683223	1	1	1	1	7.68322	3	4
32130002100	0	0	2	0	1	0	1	0	2	3	4	5	12	1	5	5	5	4	2	1	4	4	1	1	0	4	3	1	4	5	0	0	0	0	0	0	0	0	23	4	3	5	2	5	1	2	22	11	16
32130003100	0	0	3	1	1	0	1	0	3	4	4	4	12	4	3	5	1	1	2	0	1	1	0	0	0	2	1	1	1	1	0	1	0	0	0	0	0	1	9	5	4	1	1	2	6	1	20	12	5
32130004010	0	0	15	0	0	0	1	0	1	2	2	2	6	1	4	4	1	1	1	0	1	1	0	0	0	2	1	1	1	1	0	1	0	0	0	0	0	0	8	6	3	5	1	1	1	4	21	9	4
32130007010	1	1	8	1	3	1	1	0	6	1	3	1	5	4	2	3	4	3	2	1	3	3	1	1	0	1	1	1	1	1	0	0	1	0	0	0	0	0	11	1	1	1	3	2	1	5	14	9	13
32130010000	0	0	8	1	0	1	1	0	3	1	1	1	3	3	1	1	2	1	1	0	1	1	0	0	0	2	1	1	1	1	0	0	0	0	0	0	0	0	7	6	3	1	1	1	1	1	14	5	5
32130012000	1	0	5	1	0	1	1	1	4	4	2	3	9	3	2	1	1	1	1	0	1	1	0	0	0	1	1	1	1	1	0	1	0	0	0	0	0	0	7	3	2	1	1	2	4	1	14	6	4
32130015010	1	0	3	1	0	1	1	1	4	3	3	4	10	3	3	2	1	1	1	0	1	1	0	0	0	1	1	1	1	1	1	1	1	0	0	0	0	0	9	3	3	1	1	3	5	1	17	8	4
32130018000	1	1	6	0	0	0	0	0	0	3	3	2	8	4	1	2	1	1	2	0	1	1	0	0	0	3	2	1	2	2	0	0	1	0	0	0	0	0	12	4	2	1	1	3	1	1	13	7	5
32130022000	0	0	8	1	6	1	1	0	9	3	3	3	9	3	4	4	1	5	1	0	1	1	0	0	1	2	2	1	1	1	0	0	1	0	0	0	0	0	10	3	2	1	1	3	5	1	16	11	8
32130026010	1	1	6	1	2	1	1	0	5	3	4	4	11	4	2	1	2	1	2	0	1	1	0	1	0	3	2	1	1	1	0	1	0	0	0	0	0	0	11	5	4	1	2	2	6	1	21	7	6
32130027000	1	0	7	0	0	0	0	0	0	3	3	3	9	5	5	4	2	1	1	0	1	1	0	0	0	2	2	1	1	2	0	0	1	0	0	0	0	1	11	6	2	1	1	2	1	2	15	14	5
32130028000	0	0	15	1	1	1	0	0	3	3	3	3	9	4	2	4	3	5	1	0	5	1	1	1	1	4	2	1	5	5	0	1	1	0	0	0	0	1	24	6	3	4	3	4	3	3	26	10	14
32130029000	0	0	1	0	0	1	1	0	2	3	3	3	9	3	3	3	3	3	1	0	1	1	0	0	0	5	3	1	1	3	0	0	0	0	0	0	0	1	15	5	3	4	4	3	2	2	23	9	8
32130033000	0	0	10	1	7	1	1	0	10	2	3	2	7	3	2	3	3	1	1	0	2	1	0	1	0	2	1	1	1	2	0	0	0	0	0	0	0	0	9	6	3	4	1	1	3	1	19	8	7
32130036000	1	0	6	1	3	1	1	1	7	3	3	3	9	3	3	3	2	5	2	0	1	2	0	0	0	4	1	1	1	1	0	0	1	0	0	0	0	1	12	4	3	1	3	4	2	1	18	9	10
32130037000	0	0	10	0	0	0	0	0	0	3	3	4	10	3	1	1	2	5	1	0	1	1	0	0	0	2	1	1	1	1	0	1	0	0	0	0	0	0	8	6	2	2	3	2	3	2	20	5	9
32130041100	1	0	4	1	0	1	0	0	2	3	3	3	9	4	4	4	1	1	1	0	1	1	0	0	0	1	1	1	1	1	0	1	1	0	0	0	1	1	10	2	1	1	1	1	2	1	9	12	4
32130042000	1	0	18	1	0	1	1	0	3	1	1	1	3	4	3	2	1	1	1	0	1	1	0	0	0	2	3	1	1	1	0	0	1	0	0	0	0	0	10	5	2	2	2	3	3	3	20	9	4
32130043010	1	0	9	0	0	1	1	0	2	3	4	4	11	4	3	2	1	1	2	0	3	2	0	0	0	3	2	1	1	3	0	1	1	0	0	0	0	1	15	3	3	1	1	3	3	1	15	9	7
32130046000	1	0	12	1	0	1	1	0	3	2	2	2	6	3	1	3	3	3	1	0	1	1	0	0	0	3	1	1	1	3	0	1	1	0	0	0	0	0	12	4	3	1	2	3	1	1	15	7	8
32130048000	0	0	11	1	3	1	0	0	5	3	5	3	11	5	2	3	1	5	1	0	1	1	0	1	0	5	3	1	1	3	0	1	0	0	0	0	0	1	17	6	3	2	2	3	4	1	21	10	8
32130051000	0	0	10	0	0	0	1	0	1	1	1	1	3	1	1	1	2	2	1	0	1	2	0	0	0	3	1	1	1	1	0	1	1	0	0	0	0	0	11	3	2	2	2	3	1	1	14	3	6
32130052010	1	1	12	1	7	1	1	0	10	3	3	3	9	4	4	4	1	3	1	1	1	1	0	0	0	2	4	1	2	1	0	0	0	0	0	0	0	0	11	6	2	1	1	3	1	1	15	12	7
32130053000	1	0	6	0	2	0	0	0	2	3	4	3	10	4	1	3	1	4	1	0	3	1	0	0	0	4	1	1	2	2	0	1	1	0	0	0	0	0	13	6	3	3	3	3	2	1	21	8	9
32130054000	1	1	6	1	3	1	1	1	7	3	3	3	9	4	5	5	3	4	2	0	4	2	0	0	0	3	3	1	1	1	0	1	0	0	0	1	0	1	14	6	4	2	3	5	3	1	24	14	13
32130055000	1	0	7	1	1	0	0	0	2	3	3	5	11	4	1	2	2	3	1	0	1	1	0	0	0	2	1	1	1	1	0	0	0	0	0	0	0	1	8	4	3	2	1	3	1	1	15	7	7
32130056000	1	0	7	1	0	0	0	0	1	2	3	2	7	4	3	4	2	2	1	0	2	1	0	0	0	3	2	1	2	1	0	1	1	0	0	0	0	0	12	4	2	3	2	2	2	1	16	11	7
32130058000	0	0	5	0	1	1	1	1	4	5	5	3	13	4	1	1	1	1	1	0	1	3	0	1	0	2	1	1	1	1	0	0	0	0	0	0	0	0	10	6	4	1	3	2	1	2	19	6	4
32130059000	1	0	6	0	1	1	1	0	3	3	3	4	10	3	3	1	1	5	1	1	1	1	0	0	0	5	3	1	1	5	0	1	1	0	0	0	1	0	19	3	2	1	2	3	1	1	13	7	9
32130060000	1	0	4	1	4	1	0	0	6	3	3	2	8	3	1	1	2	1	1	0	1	1	0	1	1	2	2	1	1	1	0	1	0	0	0	0	0	1	12	5	3	1	2	3	1	1	16	5	5
32130063000	1	0	19	1	5	1	1	0	8	3	1	1	5	4	4	1	2	4	1	0	1	1	0	0	0	3	4	1	1	1	0	0	0	0	0	0	0	0	11	4	2	1	1	1	1	1	11	9	8
32130065000	0	0	10	0	0	0	0	0	0	3	3	1	7	1	3	1	1	1	1	0	1	1	0	0	0	1	1	1	1	1	0	1	1	0	0	0	0	1	9	2	1	1	1	1	2	1	9	5	4
32130066000	0	0	5	1	7	1	1	0	10	5	3	3	11	4	3	5	1	1	1	0	1	1	0	0	0	5	1	1	1	1	0	0	0	0	0	0	0	0	10	6	3	1	5	4	1	1	21	12	4
32130067000	1	0	8	1	3	1	1	0	6	2	3	3	8	4	3	3	1	1	1	0	1	1	0	0	0	4	1	1	1	1	0	1	1	0	0	0	0	0	11	3	2	1	1	3	2	1	13	10	4
32130068000	0	0	7	1	2	1	0	1	5	3	3	2	8	4	4	3	2	1	1	0	1	1	0	0	0	4	1	1	1	3	0	0	0	0	0	0	0	0	11	6	3	3	1	1	2	1	17	11	5
32130069000	0	0	8	1	1	0	1	0	3	3	3	2	8	3	3	2	2	5	3	0	5	2	1	0	0	2	1	1	1	1	0	1	0	0	0	0	0	1	11	6	3	4	1	3	1	1	19	8	15
32130070010	1	0	5	1	2	0	1	0	4	3	3	2	8	3	1	3	1	1	1	0	1	1	0	0	0	2	1	1	1	1	0	0	0	0	0	0	0	1	8	2	1	2	2	2	3	1	13	7	4
32130071000	0	0	11	1	2	1	1	0	5	2	2	3	7	1	3	4	3	2	1	0	1	1	0	0	0	1	1	1	1	1	0	0	0	0	0	0	0	0	6	5	2	2	2	2	1	1	15	8	7
32130072000	0	0	13	0	0	0	0	0	0	3	4	4	11	3	1	3	2	2	2	0	1	2	0	0	0	2	2	1	2	2	0	1	1	0	0	0	0	1	14	5	2	1	3	3	2	3	19	7	7
32130073010	1	0	20	1	0	0	0	0	1	1	1	1	3	5	2	1	1	1	1	0	1	1	0	0	0	5	1	1	1	1	0	0	0	0	0	0	0	0	10	2	1	1	1	5	1	1	12	8	4
32130074000	1	1	14	1	1	0	0	0	2	3	3	3	9	4	3	3	2	3	1	0	1	1	0	0	0	3	1	1	2	1	0	1	1	0	0	0	0	1	12	6	3	2	1	5	2	1	20	10	7
32130077000	0	0	1	1	3	1	1	0	6	3	3	3	9	4	2	3	2	1	1	0	5	3	0	0	0	1	1	1	1	1	0	1	0	0	0	0	0	0	9	5	2	1	1	1	1	1	12	9	9
32130078010	1	0	15	1	2	1	1	1	6	2	2	3	7	3	1	3	2	3	1	0	1	1	0	0	0	4	1	1	1	1	0	0	0	0	0	0	0	1	10	6	3	2	1	3	6	1	22	7	7
32130079000	1	0	4	1	0	1	1	0	3	1	2	2	5	3	3	1	1	1	1	0	1	1	0	0	0	4	1	1	1	1	0	1	0	0	0	0	0	0	10	5	3	1	2	2	1	1	15	7	4
32130080000	0	1	1	1	5	0	1	0	7	3	4	4	11	3	2	1	1	2	1	0	1	1	0	1	0	3	1	1	1	1	0	1	0	0	0	0	0	0	10	3	2	1	2	3	2	2	15	6	5
32130081000	0	0	7	1	0	0	1	0	2	2	2	2	6	4	3	1	1	1	1	0	1	1	0	0	0	2	1	1	1	1	0	0	0	0	0	0	0	0	7	6	1	1	1	2	2	1	14	8	4
32130082000	1	1	6	1	2	0	1	1	5	3	3	3	9	1	1	2	2	3	1	0	1	2	0	1	1	4	1	1	1	4	0	1	1	0	0	0	0	1	18	5	3	1	3	4	1	1	18	4	7
32130083000	0	0	11	1	7	1	1	1	11	3	4	4	11	2	3	2	2	2	2	0	1	2	0	1	0	3	2	2	2	3	0	1	0	0	0	0	0	1	17	6	5	5	5	2	5	1	29	7	7
32130086110	0	0	2	1	4	1	1	0	7	1	1	1	3	1	5	1	2	1	1	0	1	1	0	0	0	2	1	1	1	1	0	0	0	0	0	0	0	0	7	4	2	1	3	2	2	1	15	7	5
32130087000	0	0	3	1	2	1	1	0	5	3	3	3	9	3	4	4	2	2	2	0	1	1	0	0	0	3	2	1	1	2	0	0	1	0	0	0	0	0	11	6	2	3	2	2	1	6	22	11	7
32130090100	1	0	6	1	0	1	0	0	2	3	3	3	9	2	3	3	1	2	1	0	1	1	0	0	0	1	1	1	1	1	0	0	0	0	0	0	0	0	6	4	2	1	1	2	1	1	12	8	5
32130091010	1	0	3	1	0	1	1	0	3	4	4	4	12	3	1	3	1	1	1	0	3	1	0	0	0	4	1	1	1	1	0	0	0	0	0	0	0	0	9	5	3	1	1	3	6	1	20	7	6
32130092010	0	0	2	1	6	1	1	0	9	2	4	3	9	3	4	4	1	2	1	0	1	2	0	0	0	2	1	1	2	1	0	0	0	0	0	0	0	0	9	4	3	1	2	3	2	2	17	11	5
32130093100	0	0	4	1	2	0	0	0	3	3	4	2	9	4	3	4	3	1	1	0	1	1	1	0	0	2	1	1	1	2	0	1	1	0	0	0	0	0	11	5	3	3	2	2	3	2	20	11	6
32130094000	1	0	4	1	2	0	0	0	3	5	4	3	12	4	3	3	3	3	2	0	1	2	0	0	0	3	1	1	2	2	0	1	1	0	0	0	0	0	13	6	3	1	3	3	2	2	20	10	9
32130098000	1	0	8	1	7	1	1	1	11	3	2	2	7	4	3	4	3	4	2	0	1	2	0	0	0	5	1	1	1	1	0	1	0	0	0	0	1	0	13	2	1	1	1	3	4	1	13	11	10
32130100010	1	0	6	1	1	1	1	0	4	3	3	3	9	5	3	4	1	2	1	0	1	1	0	0	0	2	1	1	1	1	1	1	1	0	0	0	0	0	10	2	1	1	1	2	2	1	10	12	5
32130101000	0	0	9	1	4	1	1	0	7	3	3	3	9	4	4	4	1	5	1	0	1	2	0	0	0	3	1	1	1	1	0	0	0	0	0	0	0	0	9	6	3	2	2	2	2	1	18	12	8
32130102000	0	0	11	0	0	0	0	0	0	3	3	3	9	5	3	3	4	1	1	0	1	1	0	1	1	1	1	1	1	1	0	1	1	0	0	0	0	0	10	5	3	4	4	4	4	4	28	11	7
32130103000	1	0	14	1	0	0	0	0	1	3	3	3	9	3	3	4	2	3	1	0	1	1	0	0	0	3	1	1	1	3	0	1	0	0	0	0	0	0	11	3	2	1	2	2	2	1	13	10	7
32130104000	0	0	10	1	4	1	1	0	7	4	4	4	12	3	3	4	2	1	1	0	1	1	0	0	0	1	1	1	1	1	0	0	0	0	0	0	0	0	6	6	4	4	2	2	3	1	22	10	5
32130106000	1	0	7	1	3	1	1	0	6	2	3	2	7	3	3	1	2	1	1	0	1	1	0	0	0	2	1	1	1	1	0	0	0	0	0	0	0	1	8	4	2	2	1	1	2	1	13	7	5
32130107000	0	0	4	1	5	1	1	0	8	4	4	4	12	4	3	4	3	3	2	0	1	2	0	0	0	3	3	1	2	2	1	1	1	0	0	0	0	0	16	4	3	1	2	3	3	1	17	11	9
32130108010	0	0	4	1	0	0	1	0	2	3	3	3	9	1	2	1	1	1	1	0	1	1	0	0	0	1	1	1	1	1	0	0	0	0	0	0	0	0	6	2	1	1	1	1	1	1	8	4	4
32130109010	1	1	2	1	1	1	0	0	3	3	3	3	9	1	3	4	3	5	3	0	3	3	1	0	0	5	5	1	3	3	1	1	1	1	0	0	0	1	26	5	3	3	3	4	6	3	27	8	14
32130110000	1	0	4	1	1	1	1	0	4	3	4	3	10	4	3	1	1	1	1	0	1	1	0	0	0	1	1	1	1	1	0	0	0	0	0	0	0	0	6	2	3	1	2	3	2	1	14	8	4
32130111000	0	0	20	1	6	1	1	1	10	2	3	2	7	4	3	4	1	1	1	0	1	1	0	0	0	2	2	1	1	2	0	1	1	0	0	1	0	1	13	6	2	2	1	2	2	1	16	11	4
32130113000	0	0	1	1	2	1	1	0	5	5	5	5	15	4	3	2	3	1	1	0	1	2	0	0	0	2	1	1	1	1	0	0	0	0	0	0	0	0	8	4	2	1	4	2	4	1	18	9	6
32130114000	0	0	7	0	0	0	0	0	0	3	4	4	11	4	2	1	1	1	1	0	1	1	0	0	0	1	1	1	1	1	0	0	0	0	0	0	0	0	6	5	3	1	1	3	3	5	21	7	4
32130115010	0	1	4	1	4	1	1	0	7	4	4	4	12	3	1	4	3	1	1	0	1	1	0	0	0	2	2	1	1	1	0	1	1	0	0	0	0	0	10	5	3	2	2	2	3	1	18	8	6
32130119000	0	0	10	0	0	0	0	0	0	3	1	2	6	3	3	3	1	1	1	0	1	1	0	0	0	4	1	1	1	1	0	0	1	0	0	0	0	0	10	5	3	1	2	2	1	1	15	9	4
32130121010	1	0	4	1	6	1	1	0	9	2	2	2	6	4	3	4	2	1	1	0	1	1	0	0	1	3	1	1	1	3	0	1	1	0	0	0	0	0	13	5	3	2	2	2	1	1	16	11	5
32130001001-10007	0	0	2	0	0	0	0	0	0	3	3	3	9	4	1	5	4	3	1	1	2	1	0	0	0	3	2	1	1	1	0	0	1	0	0	0	0	0	10	4	2	4	5	2	1	1	19	10	11
32130005001-10009	0	0	#NULL!	0	2	0	0	0	2	2	2	2	6	2	2	2	2	2	2	0	2	2	0	0	0	2	1	1	1	1	0	0	0	0	0	0	0	0	8	4	2	1	1	2	4	1	15	6	8
32130006101-22506	0	0	8	1	3	1	1	0	6	3	3	4	10	4	4	4	3	1	1	0	1	1	0	0	0	2	2	1	1	4	0	0	1	0	0	0	0	0	12	5	3	1	1	1	6	1	18	12	6
32130008101-21606	0	0	4	0	1	1	1	0	3	3	2	4	9	2	1	2	3	4	3	0	4	3	0	0	0	3	2	1	1	1	1	0	0	0	0	0	0	1	13	5	3	5	2	2	2	2	21	5	14
32130009001-20802	0	0	6	1	3	1	1	1	7	3	4	2	9	3	3	3	4	2	3	0	2	2	0	0	0	3	3	1	2	2	0	1	1	0	0	0	0	0	15	5	3	2	3	2	5	2	22	9	11
32130011101-21606	0	0	4	1	0	1	1	0	3	3	2	4	9	2	5	5	4	1	1	0	1	1	0	0	0	2	1	1	1	1	0	1	0	0	0	0	0	0	8	4	2	2	4	2	1	4	19	12	7
32130013112-10007-21605	1	0	2	1	5	1	1	1	9	3	4	3	10	3	3	3	1	1	1	0	1	1	0	0	0	3	2	1	1	2	0	0	1	0	0	0	0	0	11	5	2	1	2	2	5	1	18	9	4
32130014112-10007-21605	1	0	8	0	0	1	0	0	1	4	4	4	12	2	1	1	1	1	1	0	1	1	0	0	0	1	1	1	1	1	1	1	1	0	0	0	1	1	11	5	2	1	2	2	2	1	15	4	4
32130016001-10009	1	0	#NULL!	1	3	1	1	1	7	3	3	2	8	3	3	2	2	1	1	0	1	2	0	0	0	2	1	1	1	1	0	1	1	0	0	0	0	0	10	3	3	1	3	3	3	3	19	8	5
32130017002-10007-21702	1	0	2	0	7	1	1	1	10	5	5	5	15	5	5	5	2	2	1	0	1	1	0	0	0	2	1	1	1	2	0	0	0	0	0	0	0	0	8	4	3	3	1	3	5	2	21	15	6
32130019002-20401-20403	0	0	1	0	0	1	0	0	1	1	1	2	4	2.62958	2	2.51211	1	1	1	0	1	1	0	0	0	1	1	1	1	1	0	1	0	0	0	0	0	0	7	2	1	1	1	1	2	1	9	7.14169	4
32130020001-21402	0	0	8	0	0	0	0	0	0	3	3	3	9	3	3	3	2	2	2	0	1	1	0	0	0	2	1	1	1	1	1	1	0	0	0	0	1	1	11	2	3	2	2	2	2	2	15	9	7
32130021002-22504-22505	0	0	7	1	2	1	1	0	5	3	2	2	7	3	4	4	1	1	1	0	1	1	0	0	0	2	1	1	1	1	0	0	0	0	0	0	0	0	7	5	3	1	1	1	3	1	15	11	4
32130023102-10009-21606	0	0	#NULL!	1	2	0	0	0	3	4	3	3	10	4	4	4	3	5	1	0	1	2	0	0	0	5	2	1	1	1	0	0	1	0	0	0	0	0	13	6	3	2	3	6	1	1	22	12	10
32130024001-10007	0	0	1	1	0	1	1	0	3	4	5	5	14	5	3	5	2	4	2	0	4	1	0	0	0	5	4	1	1	1	0	1	1	0	0	0	0	0	15	3	4	3	1	6	2	1	20	13	12
32130025001-10007	1	0	6	0	0	0	0	0	0	1	1	3	5	3	4	3	2	3	1	0	1	1	0	0	0	2	1	1	1	1	0	1	0	0	0	0	0	0	8	5	4	1	1	3	1	1	16	10	7
32130030001-22503	0	0	16	1	1	1	1	0	4	4	5	5	14	4	3	4	1	2	1	0	1	2	0	0	0	2	2	1	1	1	1	1	1	0	0	1	0	1	14	6	3	3	3	3	1	1	20	11	5
32130031001-22503	0	0	5	1	0	1	1	0	3	3	3	3	9	3	3	3	1	1	1	0	1	1	0	1	0	1	2	1	1	1	0	0	1	0	0	0	0	0	9	5	3	2	2	3	5	1	21	9	4
32130032012-10009-22505	0	0	#NULL!	1	0	1	1	0	3	3	3	2	8	3	1	1	1	2	1	0	1	2	0	0	0	3	1	1	1	1	0	1	1	0	0	0	0	0	11	4	3	1	3	2	3	1	17	5	5
32130034014-22502-22503-22504-22505	0	0	14	1	3	1	1	0	6	3	3	2	8	4	1	5	1	1	1	0	1	1	1	0	0	1	1	1	1	2	0	1	1	0	0	0	0	1	11	6	2	1	4	2	1	1	17	10	4
32130035002-22506-22806	0	0	2	1	2	0	0	0	3	3	3	2	8	4	1	1	2	1	1	0	1	2	0	1	0	1	1.30554	1	1	1	0	1	0	0	0	0	0	1	10.3055	4	2	2	2	2	5	1	18	6	5
32130038011-10009	0	0	#NULL!	1	1	0	0	0	2	3	4	3	10	4	1	4	2	1	1	0	1	1	0	0	1	3	4	1	1	1	0	1	1	0	0	0	0	1	15	2	2	1	1	2	1	1	10	9	5
32130039013-22205-22504-22505	0	0	3	1	7	1	0	0	9	4	3	3	10	4	5	3	1	1	1	0	1	1	0	0	0	4	2	1	1	1	0	0	0	0	0	0	0	0	10	1	1	1	1	2	1	1	8	12	4
321300400002-22307-22506	1	0	3	1	4	1	1	0	7	4	4	3	11	5	1	3	3	3	1	0	1	2	0	0	0	3	1	1	1	2	0	0	0	0	0	0	0	1	11	4	2	4	4	4	1	2.03468	21.0347	9	8
32130044001-22506	1	0	4	0	1	0	1	0	2	1	1	1	3	4	1	2	1	1	1	0	1	1	0	0	0	5	1	1	1	1	0	0	0	0	0	0	0	0	10	3	1	1	1	2	1	1	10	7	4
32130045004-10010-10011-22506-22806	1	0	4	1	0	0	1	0	2	3	4	3	10	4	4	4	1	1	1	0	1	1	0	0	0	3	1.61805	1	1	1	0	1	1	0	0	0	0	1	11.618	3	2	1	1	3	1	1	12	12	4
32130047015-22502-22503-22504-22505-22506	1	0	3	1	4	0	1	1	7	4	4	4	12	4	3	4	2	3	1	0	1	1	0	0	0	5	1	1	1	1	0	1	1	0	0	0	0	0	12	4	3	4	3	3	1	1	19	11	7
32130049001-22303	0	0	6	1	0	1	0	0	2	1	3	3	7	3	1	3	2	5	1	0	1	1	0	0	0	3	2	1	1	1	0	0	0	0	0	0	0	0	9	2.83766	1	1	1	2	1	1	9.83766	7	9
32130050001-10009	0	0	#NULL!	1	0	0	0	0	1	5	5	3	13	4	1	5	1	3	1	0	1	1	0	0	0	2	2	1	1	1	0	1	1	0	0	0	0	1	11	4	2	1	2	2	1	1	13	10	6
32130057102-10007-21606	0	0	#NULL!	1	5	1	1	1	9	3	3	3	9	4	3	3	1	5	1	0	1	1	0	1	0	3	1	1	1	1	0	1	1	0	0	0	0	0	11	6	3	1	2	3	2	1	18	10	8
32130061002-21606-22506	1	0	15	1	0	1	0	0	2	3	3	3	9	3	3	1	2	2	1	0	1	1	0	0	0	3	2	1	1	1	0	0	0	0	0	0	0	0	9	6	2	1	6	3	1	1	20	7	6
32130062006-10007-10008-22801-22801-22802-22803-22804	1	0	#NULL!	0	1	1	1	0	3	4	4	4	12	3	3	3	1	1	1	0	1	1.46145	0.0716008	0.409534	0.207048	2	2	1	1	1	0	0	0	0	0	0	0	0	9.14963	6	4	1	2	2	6	1	22	9	4
32130064001-10007	0	0	6	1	7	1	1	1	11	3	4	3	10	3	4	3	3	4	3	1	4	2	1	0	1	3	4	3	4	3	0	0	0	0	0	0	0	0	21	3	4	6	6	2	5	6	32	10	15
32130075001-10009	1	1	#NULL!	1	2	1	1	0	5	4	3	4	11	4	5	4	2	5	1	0	3	1	0	0	0	5	1	2	1	1	0	1	1	0	0	0	0	0	13	4	2	1	2	3	2	2	16	13	11
32130076001-20403	0	0	2	1	0	0	0	0	1	1	3	3	7	4	2	3	1	1	1	0	1	1	0	0	0	3	1	1	1	1	0	1	0	0	0	0	0	0	9	2	2	1	1	1	1	1	9	9	4
32130084111-10009	0	0	#NULL!	1	2	1	1	1	6	2	4	3	9	4	1	4	1	1	1	0	1	1	0	0	0	1	1	1	1	1	0	0	0	0	0	0	0	0	6	4	3	2	2	2	1	2	16	9	4
32130085001-22806	0	0	6	0	0	1	0	0	1	2	5	3	10	4	3	3	3	1	1	0	2	2	0	0	0	3	1.72595	1	1	2	0	1	0	0	0	0	0	1	12.726	5	3	1	2	3	2	1	17	10	7
32130088011-22503	0	0	4	1	7	1	1	0	10	3	2	3	8	2	2	2	1	1	1	0	1	1	0	0	0	3	1	1	1	1	0	0	0	0	0	0	0	0	8	3	2	1	1	3	1	1	12	6	4
32130089012-21408-21409	0	0	5	1	7	1	1	1	11	4	4	3	11	4	1	1	1	1	1	0	1	1	0	0	0	1	1	1	1	1	0	1	0	0	0	0	0	1	8	6	3	1	2	3	1	1	17	6	4
32130095101-21606	1	0	10	1	2	1	1	0	5	3	4	4	11	3	2	2	3	3	1	1	1	2	0	0	0	3	1	1	1	3	1	1	1	1	0	0	0	1	16	6	3	5	1	2	2	1	20	7	9
32130096001-10007	1	0	10	0	3	1	1	0	5	4	3	4	11	4	3	5	3	3	1	0	1	2	0	0	0	3	1	1	1	1	0	0	1	0	0	0	0	0	10	6	3	2	3	4	1	1	20	12	8
32130097014-22502-22503-22504-22505	0	0	6	1	0	0	0	0	1	3	3	2	8	4	2	3	3	3	2	0	2	2	0	0	0	4	2	1	1	1	0	0	1	0	0	0	0	0	12	4	2	4	3	4	3	3	23	9	10
32130099001-22804	1	0	10	1	3	1	1	0	6	3	3	3	9	3	3	3	3	1	1	1	1	1	0	0	0	3	1	1	1	1	0	0	0	0	0	0	0	0	8	5	3	2	5	5	6	2	28	9	7
32130105001-21606	0	0	20	1	0	1	0	0	2	3	4	3	10	3	1	3	1	1	1	0	1	1	0	1	0	2	1	1	1	1	0	0	0	0	0	0	0	0	8	4	2	2	3	3	2	1	17	7	4
32130112003-22503-22504-22505	1	1	6	1	0	0	1	0	2	2	2	2	6	3	2	3	1	3	1	0	1	1	0	0	0	2	3	1	1	1	0	0	1	0	0	0	0	1	11	3	3	1	2	2	3	1	15	8	6
32130116017-22401-22402-22502-22503-22504-22505-22506	0	0	8	1	6	1	1	0	9	3	3	3	9	3	3	3	1	1	1.04379	0	1	1	0	0	0	2	1	1	1	1	0	0	0	0	0	0	0	1	8	4	3	1	1	1	1	1	12	9	4.04379
32130117012-22505-22506	0	0	18	1	2	1	1	0	5	4	4	3	11	3	4	1	3	1	1	0	1	1	0	0	0	1	1	1	1	1	0	1	0	0	0	0	0	1	8	5	2	1	2	1	1	1	13	8	6
32130118001-10009	1	0	#NULL!	0	0	0	0	0	0	3	3	3	9	1	1	1	3	1	1	0	1	1	0	0	0	4	1	1	1	1	0	1	1	0	0	0	0	0	11	3	1	1	1	2	1	1	10	3	6
32130120002-21408-21409	0	0	10	0	0	0	0	0	0	3	4	3	10	4	2	4	3	1	1	0	1	1	0	1	1	2	1	1	1	2	0	0	0	0	0	0	0	0	10	6	3	3	2	3	2	1	20	10	6
32130122001-22506	1	0	1	1	0	0	0	0	1	3	4	3	10	2	3	1	1	1	1	0	1	2	0	1	1	3	1	1	1	1	1	1	0	0	0	0	0	0	13	4	2	1	3	3	1	1	15	6	4
32143001000	1	0	4	1	2	0	1	0	4	3	2	3	8	4	1	2	1	1	1	0	1	1	0	0	0	1	1	1	1	1	0	0	1	0	0	0	0	1	8	6	2	1	1	1	3	2	16	7	4
32143002000	1	0	16	1	4	1	1	1	8	3	3	3	9	3	1	1	1	1	2	0	1	1	0	0	0	4	1	1	1	1	0	1	1	0	0	0	0	0	11	6	3	1	2	2	2	1	17	5	5
32143003010	1	0	2	1	7	1	1	1	11	3	5	3	11	5	2	5	4	1	1	0	1	1	0	0	0	3	5	1	1	3	0	0	0	0	0	0	0	0	14	4	4	1	1	3	1	1	15	12	7
32143004010	1	0	6	1	1	0	0	0	2	1	1	1	3	3	3	3	2	1	1	0	1	2	0	0	0	2	1	1	1	1	0	0	0	0	0	0	0	0	8	1	2	1	1	1	1	1	8	9	5
32143005010	1	1	6	1	4	1	1	1	8	5	5	4	14	4	2	3	4	4	4	1	3	2	1	0	0	5	5	5	5	5	1	1	1	0	0	0	0	1	32	4	3	2	5	5	2	5	26	9	16
32143006000	0	0	14	1	3	1	0	1	6	3	4	4	11	3	1	2	2	2	3	1	2	1	0	0	0	4	4	2	1	2	0	0	0	0	0	0	0	0	14	5	3	2	3	2	2	2	19	6	10
32143008010	0	0	3	1	0	1	1	0	3	2	3	3	8	4	2	2	1	4	1	0	1	1	0	0	0	5	4	1	1	1	0	1	1	0	0	1	0	0	16	4	2	5	3	4	1	1	20	8	7
32143010000	0	0	2	1	7	1	1	0	10	3	4	3	10	3	3	2	2	3	1	0	1	1	0	0	1	3	1	1	1	1	0	1	1	0	0	0	0	1	12	6	3	2	1	3	1	1	17	8	7
32143011000	1	0	7	0	1	0	0	0	1	3	3	3	9	4	4	4	3	2	2	0	1	1	0	0	0	1	1	1	1	1	0	0	0	0	0	0	0	0	6	2	2	5	5	2	2	2	20	12	8
32143013100	1	1	4	0	1	0	0	0	1	5	5	5	15	4	4	3	1	1	1	0	1	1	0	0	0	1	1	1	1	1	0	0	0	0	0	0	0	0	6	1	1	1	1	1	3	1	9	11	4
32143014100	0	0	11	0	1	0	0	0	1	5	5	5	15	4	4	4	1	2	1	0	1	1	0	0	0	1	1	1	1	1	0	0	0	0	0	0	0	0	6	2	1	1	1	1	2	1	9	12	5
32143015100	0	1	11	0	1	0	0	0	1	5	5	5	15	4	4	4	1	1	1	0	1	1	0	0	0	1	1	1	1	1	0	0	0	0	0	0	0	0	6	1	1	1	1	1	1	1	7	12	4
32143019010	0	0	7	0	0	0	0	0	0	3	3	3	9	4	2	3	1	2	1	0	1	1	0	0	0	3	1	1	1	2	0	1	0	0	0	0	0	0	10	4	2	1	2	3	2	1	15	9	5
32143020000	1	0	2	1	1	1	1	0	4	3	4	3	10	4	3	4	4	1	1	0	1	2	0	0	0	2	1	1	1	1	0	0	1	0	0	0	0	0	9	4	2	2	2	2	1	1	14	11	7
32143025000	0	0	5	0	0	0	0	0	0	2	2	2	6	3	2	1	2	1	1	0	1	3	0	0	0	1	1	1	1	1	0	1	0	0	0	0	0	0	9	5	1	1	1	3	4	1	16	6	5
32143026010	0	0	6	1	3	1	0	1	6	1	2	1	4	1	4	4	1	1	1	0	1	2	0	0	0	1	1	1	1	1	0	0	0	0	0	0	0	0	7	3	2	1	1	1	2	1	11	9	4
32143030010	0	0	3	1	0	1	0	0	2	4	5	5	14	3	1	1	2	1	1	0	1	1	0	0	0	4	1	1	1	1	0	1	1	0	0	0	0	0	11	4	3	1	2	4	3	1	18	5	5
32143032000	0	0	8	1	3	1	1	0	6	5	5	4	14	5	3	3	3	1	1	0	1	1	0	0	0	3	1	1	1	2	0	0	0	0	0	0	0	0	9	6	4	3	2	3	1	2	21	11	6
32143033000	1	0	7	0	0	0	0	0	0	4	3	3	10	4	4	1	2	3	2	0	3	2	0	1	1	2	2	1	1	1	0	0	0	0	0	0	0	1	12	6	2	3	2	2	2	1	18	9	10
32143034000	0	0	4	1	1	1	1	0	4	4	3	2	9	3	1	2	2	1	1	0	1	1	0	0	0	2	1	1	1	1	0	1	0	0	0	0	0	0	8	3	2	1	1	2	3	1	13	6	5
32143035010	0	0	7	1	2	0	1	0	4	3	3	3	9	4	4	3	2	1	2	0	2	1	0	0	0	2	1	1	1	2	0	1	0	0	0	0	0	1	10	4	2	1	2	2	2	1	14	11	7
32143037000	0	0	4	1	0	1	1	0	3	2	3	1	6	1	1	1	3	2	1	0	1	1	0	0	0	2	1	2	1	1	0	0	0	0	0	0	0	0	8	6	4	3	3	3	6	1	26	3	7
32143038000	0	0	2	1	0	1	1	0	3	3	3	3	9	4	3	3	1	1	1	0	1	1	0	0	0	3	2	1	1	1	0	0	0	0	0	0	0	0	9	4	2	1	4	3	1	1	16	10	4
32143040000	0	1	1	1	2	0	0	0	3	1	2	2	5	4	2	2	2	1	1	0	1	2	0	0	0	2	1	1	1	1	1	1	0	0	0	0	0	0	10	2	2	2	1	2	1	1	11	8	5
32143041010	1	0	2	0	1	1	0	0	2	2	3	3	8	2	2	2	1	1	1	0	1	1	0	0	0	2	1	1	1	1	0	1	0	0	0	0	0	0	8	3	3	1	1	2	1	1	12	6	4
32143043000	1	0	5	0	3	1	1	0	5	4	5	3	12	3	2	3	3	1	1	1	1	1	0	0	0	3	1	1	1	1	1	1	1	0	0	0	0	0	11	3	2	3	2	3	1	1	15	8	7
32143045000	1	1	6	1	1	0	1	0	3	3	3	2	8	4	3	3	3	1	1	0	1	1	0	0	0	5	1	2	1	1	0	1	1	0	0	0	0	1	14	5	3	3	3	3	2	3	22	10	6
32143047000	0	0	4	1	5	1	1	0	8	3	3	3	9	3	3	2	1	1	1	0	1	1	0	0	0	1	1	1	1	1	0	1	0	0	0	0	0	1	8	3	2	1	2	2	2	1	13	8	4
32143049000	0	0	7	1	7	1	1	1	11	3	3	4	10	3	4	4	3	4	3	0	1	2	0	0	0	4	4	1	1	1	0	1	1	0	0	0	0	1	16	4	3	2	2	3	2	1	17	11	11
32143050000	0	0	14	1	0	1	1	1	4	3	4	3	10	4	3	4	2	1	2	0	1	1	0	0	0	4	3	1	1	2	0	1	0	0	0	0	0	1	14	6	3	3	6	3	2	2	25	11	6
32143051000	1	0	5	0	6	0	0	0	6	5	4	5	14	4	3	4	3	3	2	0	3	2	0	0	0	3	3	1	2	1	0	1	0	0	0	0	0	1	14	3	3	2	3	2	5	2	20	11	11
32143054000	1	0	1	0	0	0	0	0	0	3	3	3	9	2	2	1	2	1	1	0	1	1	0	0	0	3	2	1	1	2	0	1	1	0	0	0	0	1	13	4	2	1	2	2	3	1	15	5	5
32143055000	0	0	6	0	0	0	0	0	0	2	3	3	8	2	2	1	1	1	1	0	1	1	0	0	0	1	1	1	1	1	0	1	1	0	0	0	0	0	8	4	2	2	1	1	1	1	12	5	4
32143057000	1	1	2	0	7	0	0	0	7	4	4	2	10	4	3	4	4	5	3	0	1	2	1	0	0	3	4	1	2	2	1	1	1	0	0	0	1	1	20	6	4	3	3	5	6	3	30	11	13
32143058100	1	0	2	0	0	0	0	0	0	3	3	3	9	3	3	3	2	3	2	0	1	1	0	0	0	1	1	1	1	1	0	1	0	0	0	0	0	0	7	2	3	2	1	2	2	2	14	9	8
32143059000	1	0	12	1	0	0	0	0	1	2	3	2	7	3	2	4	2	1	1	0	1	1	0	0	0	3	1	1	1	1	1	1	1	0	0	0	0	0	11	5	3	2	3	4	2	1	20	9	5
32143060010	0	0	2	1	3	1	1	0	6	4	4	3	11	3	3	1	1	1	1	0	1	1	0	1	1	1	1	1	1	1	0	1	0	0	0	0	0	0	9	6	4	2	1	1	1	1	16	7	4
32143061000	0	0	5	0	2	1	1	0	4	3	3	2	8	3	4	2	1	1	1	0	1	1	0	0	0	2	1	1	1	1	0	0	0	0	0	0	0	0	7	6	2	1	3	1	1	2	16	9	4
32143063010	0	0	11	0	1	1	0	0	2	2	2	2	6	1	1	1	1	1	1	0	1	1	0	0	0	1	1	1	1	1	0	0	0	0	0	0	0	0	6	6	2	1	1	2	1	1	14	3	4
32143064000	0	0	5	1	7	1	1	0	10	3	3	3	9	4	4	4	2	1	1	0	2	1	0	0	0	1	1	1	1	1	0	0	0	0	0	0	0	0	6	6	4	4	4	3	6	3	30	12	6
32143065010	1	1	2	1	0	1	1	0	3	4	4	4	12	4	3	4	2	1	2	1	2	2	0	0	0	1	1	4	1	1	1	1	1	1	0	0	0	0	14	2	3	1	1	3	4	1	15	11	8
32143066000	1	1	5	1	5	1	1	0	8	3	3	3	9	5	5	3	1	5	1	0	1	1	0	0	0	2	1	1	5	1	0	0	0	0	0	0	0	0	11	6	4	3	2	2	6	1	24	13	8
32143067010	0	0	3	1	6	1	1	0	9	3	4	4	11	3	4	5	2	1	1	0	1	1	0	0	1	2	1	1	1	3	0	1	0	0	0	0	0	0	11	5	3	1	1	2	1	1	14	12	5
32143070000	0	0	1	1	7	1	0	0	9	1	3	3	7	4	2	3	2	4	1	0	1	2	0	0	0	3	3	1	1	2	0	1	1	0	0	0	0	1	15	2	2	2	2	6	3	2	19	9	8
32143071010	0	0	6	0	0	1	0	0	1	3	3	2	8	1	3	3	2	3	1	1	2	1	0	1	1	2	1	1	1	1	0	1	0	0	0	0	0	0	10	6	2	1	1	2	1	1	14	7	9
32143072000	0	0	5	1	5	1	1	1	9	3	4	3	10	3	1	2	2	1	1	0	1	1	0	0	0	2	1	1	2	1	1	1	0	0	0	0	0	0	10	4	3	1	3	2	5	1	19	6	5
32143073000	0	0	13	1	2	1	1	0	5	3	5	3	11	4	3	3	3	3	1	0	1	1	0	0	0	3	3	1	2	3	0	1	1	0	0	0	0	1	16	5	3	3	2	2	3	3	21	10	8
32143074000	1	1	3	1	1	1	1	0	4	4	3	2	9	2	3	1	1	1	1	0	1	1	0	0	0	2	1	1	1	2	0	1	0	0	0	0	0	0	9	2	2	1	1	3	1	1	11	6	4
32143075010	0	0	3	1	0	1	0	1	3	4	4	4	12	4	4	4	1	1	1	0	1	1	0	0	0	5	2	1	1	1	0	0	0	0	0	0	0	1	12	4	2	1	1	3	4	1	16	12	4
32143077000	1	0	11	1	0	0	0	0	1	4	3	3	10	4	1	1	1	5	1	1	3	1	0	0	0	5	4	1	1	4	0	1	1	0	0	0	0	0	18	5	3	4	3	4	5	3	27	6	11
32143078000	1	1	7	1	2	0	0	0	3	3	2	3	8	3	2	2	2	1	1	0	1	1	0	0	0	3	1	1	1	1	0	0	0	0	0	0	0	0	8	4	3	1	1	2	1	1	13	7	5
32143079000	1	0	1	0	0	1	1	0	2	2	1	2	5	5	1	3	1	1	1	0	3	1	0	0	0	5	5	2	1	1	1	1	1	0	0	1	0	1	20	5	3	4	2	4	6	1	25	9	6
32143080000	0	0	20	1	4	1	1	1	8	3	3	3	9	4	5	2	3	3	1	0	1	1	0	0	0	4	1	1	5	1	0	1	1	0	0	0	0	0	15	5	2	1	3	3	3	3	20	11	8
32143083000	0	0	5	1	4	1	1	0	7	4	4	4	12	4	1	4	2	1	1	0	1	1	0	0	0	1	2	1	1	1	0	0	0	0	0	0	0	1	8	5	4	1	6	4	6	1	27	9	5
32143084000	0	0	11	0	3	1	1	0	5	3	3	4	10	2	1	3	1	1	1	0	1	1	0	0	0	1	1	1	1	1	0	1	1	0	0	1	0	0	9	2	2	2	2	4	2	5	19	6	4
32143085000	0	1	13	0	3	1	1	0	5	3	4	3	10	2	1	3	3	1	1	0	1	1	0	0	0	1	1	1	1	1	0	0	1	0	0	0	0	0	7	2	3	5	2	1	2	2	17	6	6
32143086000	0	0	7	0	2	1	1	0	4	4	3	3	10	4	1	2	1	1	1	0	1	1	0	0	0	1	1	1	1	1	0	0	1	0	0	0	0	0	7	2	2	1	1	5	3	1	15	7	4
32143007004-10007-22303-22306-22307	1	1	14	1	2	1	1	0	5	4	4	4	12	2	1	3	2	3	1	0	1	1	0	0	0	3	1	1	1	1	0	0	1	0	0	0	0	0	9	5	3	2.31242	2.57572	2	2	2.12914	19.0173	6	7
32143009001-22503	0	0	7	1	0	1	1	1	4	2	1	4	7	3	1	1	3	1	1	0	3	1	0	0	0	2	1	1	1	4	1	1	1	0	0	0	0	1	14	6	3	2	2	3	4	1	21	5	8
32143012102-10002-20603	0	#NULL!	15	0	1	0	0	0	1	2	3	5	10	4	3	4	2	1	1	0	1	1	0	0	0	1	1	1	1	1	0	0	0	0	0	0	0	0	6	1	1	1	2	1	1	1	8	11	5
32143016001-10007	1	1	16	1	0	1	1	0	3	2	3	3	8	2	1	3	2	2	2	1	1	1	0	0	0	1	1	1	1	1	0	1	1	0	0	0	0	0	8	2	2	5	2	2	2	2	17	6	8
32143017102-21301-21406	0	0	15	0	1	0	0	0	1	2	2	3	7	4	3	4	3	2	1	0	1	1	0	0	0	1	1	1	1	1	0	0	0	0	0	0	0	0	6	1	1	4	1	2	1.15122	1	11.1512	11	7
32143018002-22506-10009	1	0	#NULL!	1	0	0	0	0	1	3	4	3	10	3	2	4	2	3	3	0	1	1	0	0	1	5	2	1	1	1	0	0	0	0	0	0	0	1	13	2	2	2	2	3	1	1	13	9	9
32143021111-21104	1	0	1	1	0	0	0	1	2	1	2	3	6	1	2	1	1	1	1	0	1	1	0	0	0	2	2	2	2	1	0	1	1	0	1	0	1	0	14	1	1	1	1	1	6	1	12	4	4
32143022002-10007-21409	1	0	1	1	1	0	1	0	3	1	3	2	6	1	4	2	2	2	3	0	4	2	0	0	0	2	2	1	2	2	0	1	1	0	0	0	0	0	13	2	2	2	2	2	3	2	15	7	11
32143023001-22602	1	0	1	0	0	0	0	0	0	5	5	4	14	3	2	5	4	3	3	1	3	3	1	1	0	2	2	1	1	2	0	0	0	0	0	0	0	0	13	5	3	5	2	5	5	2	27	10	14
32143024001-22503	0	0	11	1	2	1	1	0	5	2	4	1	7	5	3	5	2	1	1	0	1	1	0	0	0	3	1	1	1	1	0	0	1	0	0	0	0	1	10	6	3	2	1	2	1	1	16	13	5
32143027001-22503	0	0	6	1	5	1	0	1	8	4	4	3	11	4	3	4	2	2	2	0	1	3	0	0	0	5	1	1	1	1	0	1	0	1	0	0	0	0	14	3	4	3	3	3	6	2	24	11	7
32143028001-22503	0	0	3	1	4	1	0	0	6	3	3	3	9	4	5	5	3	1	1	0	3	1	0	0	0	4	2	1	1	1	0	1	1	1	0	0	0	0	13	3	2	2	2	3	4	1	17	14	8
32143029001-10008	1	0	5	1	7	1	1	1	11	4	4	4	12	4	1	3	2	5	1	0	2	1	0	1	0	5	4	1	1	5	0	1	0	0	0	0	0	0	19	6	4	1	2	3	3	1	20	8	10
32143031001-21606	0	0	8	0	0	1	0	0	1	3	3	2	8	4	3	1	1	2	1	0	1	2	0	0	1	1	1	1	1	3	0	0	0	0	0	0	0	0	10	4	2	3	3	4	1	3	20	8	5
32143036101-21606	1	1	4	1	0	1	1	0	3	4	3	4	11	2	1	2	1	1	1	0	1	1	0	0	0	3	1	1	1	1	0	1	1	0	0	0	0	1	11	4	3	1	3	2	2	1	16	5	4
32143039011-21606	0	0	7	1	7	1	1	1	11	3	3	3	9	3	2	3	2	4	1	0	1	1	0	0	0	2	4	1	1	1	0	0	0	0	0	0	0	0	10	5	4	3	2	2	1	1	18	8	8
32143042011-21606	1	0	6	1	1	1	0	0	3	1	3	3	7	4	4	4	3	3	1	0	3	1	0	0	0	2	2	1	1	2	0	0	0	0	0	0	0	0	9	3	1	1	1	1	1	1	9	12	10
32143044002-21606-22503	1	1	3	1	0	1	1	0	3	4	4	4	12	4	4	2	3	3	1	0	1	1	0	0	0	2	1	1	1	1	0	0	0	0	0	0	0	0	7	3	3	1	5	5	6	5	28	10	8
32143046001-22503	1	0	7	1	0	1	1	0	3	3	4	4	11	3	1	3	3	1	1	0	1	1	0	0	0	4	1	1	1	1	0	1	0	0	0	0	0	1	11	5	4	3	3	2	6	3	26	7	6
32143048001-22503	0	1	3	0	7	1	1	0	9	4	4	4	12	4	2	1	2	2	1	0	1	1	0	0	0	3	1	1	1	5	0	1	0	0	0	0	0	0	13	6	4	1	4	4	3	1	23	7	6
32143052001-21606	1	0	6	0	2	1	0	0	3	4	4	4	12	3	3	4	1	1	1	0	1	1	0	0	0	3	1	1	1	1	0	1	0	0	0	0	0	1	10	5	3	1	2	2	1	1	15	10	4
32143053012-22504-22505	1	0	2	0	0	0	0	0	0	3	3	3	9	1	1	3	1	1	1	0	1	1	0	0	0	2	1	1	1	1	0	0	0	0	0	0	0	0	7	3	2	1	1	1	1	1	10	5	4
32143056002-21104-22503	0	0	14	1	2	1	1	0	5	2	2	3	7	5	2	1	2	2	1	0	5	2	0	0	0	2	1	1	1	1	0	0	1	0	0	0	0	0	9	3	3	3	2	3	3	2	19	8	10
32143062001-22503	1	1	3	0	0	0	0	0	0	3	3	3	9	3	1	3	1	2	1	0	1	2	0	0	1	3	1	1	2	1	1	0	0	0	0	0	0	1	13	3	3	2	2	5	2	3	20	7	5
32143068001-21606	1	0	1	0	2	1	1	0	4	4	4	4	12	1	1	4	3	1	1	0	1	1	0	0	0	1	1	1	1	1	0	0	0	0	0	0	0	0	6	6	3	2	2	3	2	2	20	6	6
32143069001-22503	0	0	2	1	0	0	1	1	3	4	3	3	10	4	1	2	2	3	2	0	1	1	1	1	0	3	2	1	1	1	0	1	1	0	0	0	0	0	13	6	4	1	1	2	6	1	21	7	8
32143076001-21606	1	0	4	0	1	0	0	0	1	2	2	2	6	1	3	1	1	5	1	0	1	1	0	0	0	5	1	1	1	1	0	0	0	0	0	0	0	0	10	4	3	5	4	2	1	1	20	5	8
32143081001-21606	0	0	2	1	3	1	1	0	6	3	3	3	9	3	2	2	1	1	2	0	5	3	0	0	0	4	1	1	4	5	0	1	1	0	0	0	0	0	20	5	4	3	6	3	2	1	24	7	9
32143082001-22504	1	0	12	0	2	0	1	0	3	3	3	3	9	3	3	3	1	2	2	1	2	3	1	0	0	2	2	1	1	1	0	0	0	0	0	0	0	0	11	1	3	2	1	1	6	1	15	9	8
32151001010	0	0	6	1	0	1	1	0	3	3	3	2	8	3	2	3	2	1	1	0	1	1	0	0	0	2	1	1	1	1	0	0	0	0	0	0	0	0	7	4	2	2	2	2	1	2	15	8	5
32151003000	1	0	20	1	7	0	1	0	9	3	3	1	7	5	2	5	4	2	1	0	1	1	0	0	0	2	1	1	1	3	0	1	1	0	0	0	0	0	11	6	4	3	2	4	3	1	23	12	8
32151005000	0	1	3	1	6	1	1	1	10	3	1	2	6	4	4	4	4	5	1	0	5	1	0	0	0	5	1	1	1	1	0	0	0	0	0	0	0	0	10	6	3	3	2	6	1	1	22	12	15
32151006000	0	0	2	1	7	1	1	1	11	1	3	3	7	1	1	3	4	1	1	0	1	1	0	0	0	3	1	1	1	1	1	1	0	0	0	0	0	1	11	3	3	2	2	3	2	2	17	5	7
32151007000	0	0	1	1	2	1	1	0	5	4	1	3	8	4	3	3	3	2	1	1	1	2	1	0	1	1	2	1	2	2	0	1	0	0	0	0	0	0	13	2	3	2	2	3	2	6	20	10	8
32151011100	1	0	7	0	2	0	0	0	2	4	4	4	12	1	1	1	1	2	1	0	1	1	0	0	0	2	1	1	1	1	1	0	0	0	0	0	0	1	9	1	1	1	1	3	2	1	10	3	5
32151014010	0	0	8	0	0	0	1	0	1	4	4	4	12	4	2	2	1	1	1	0	1	1	0	0	0	2	1	1	1	1	0	0	1	0	0	0	0	1	9	2	1	2	1	2	2	1	11	8	4
32151015010	0	0	2	0	0	0	0	0	0	2	2	2	6	1	1	1	4	1	1	0	1	1	0	0	0	1	1	1	1	1	0	1	0	0	0	0	0	0	7	1	1	1	1	2	1	1	8	3	7
32151016000	0	0	4	1	1	1	1	1	5	1	1	3	5	1	3	1	1	1	1	0	1	1	0	0	0	2	1	1	1	1	0	1	1	0	0	0	0	0	9	4	1	1	2	2	1	1	12	5	4
32151019000	0	0	5	1	1	1	1	1	5	3	2	3	8	3	1	1	2	1	1	0	2	1	0	0	0	3	2	1	1	2	0	1	1	0	0	0	0	1	13	4	3	2	2	2	6	2	21	5	6
32151021100	1	0	6	0	1	1	0	0	2	1	5	5	11	3	1	3	1	5	2	0	1	1	0	0	0	3	5	1	1	1	1	0	1	1	0	0	0	0	15	6	5	1	5	5	2	1	25	7	9
32151023000	0	0	8	1	6	1	1	0	9	4	4	3	11	5	3	4	1	1	1	0	1	1	0	0	0	2	1	1	3	5	1	1	1	0	0	0	1	1	18	5	4	3	4	1	5	2	24	12	4
32151025010	0	0	6	0	4	1	1	0	6	1	4	3	8	3	2	1	1	1	1	0	1	1	0	0	0	5	1	1	1	1	0	0	0	0	0	0	0	0	10	2	2	1	1	2	1	1	10	6	4
32151027000	0	0	7	1	2	0	1	1	5	1	3	3	7	4	1	1	4	5	2	0	5	4	0	0	0	2	1	1	1	1	0	0	0	0	0	0	0	0	10	6	5	3	3	4	1	4	26	6	16
32151029010	0	0	4	1	1	1	1	0	4	3	3	4	10	4	1	3	3	3	1	0	2	2	0	0	0	3	2	1	1	5	0	1	1	0	0	0	0	0	16	6	3	1	3	4	2	3	22	8	9
32151031000	0	1	7	1	7	1	0	0	9	4	4	4	12	4	3	3	1	2	1	0	1	1	0	0	1	1	1	1	1	1	0	0	0	0	0	0	0	1	8	4	2	1	3	1	2	1	14	10	5
32151034000	0	0	2	1	7	1	1	1	11	5	4	5	14	2	3	3	2	2	2	0	5	2	0	1	0	3	1	1	1	1	0	1	1	0	0	0	0	1	13	5	5	2	3	3	2	2	22	8	11
32151035000	0	0	1	1	2	1	1	0	5	3	4	3	10	4	3	3	2	2	2	1	2	2	0	0	0	3	2	1	2	2	0	1	0	0	0	0	1	0	14	4	2	4	2	2	2	3	19	10	9
32151038010	1	1	4	1	1	1	1	1	5	3	3	3	9	4	2	4	2	1	1	0	1	1	0	0	0	1	1	1	1	1	0	0	0	0	0	0	0	0	6	2	1	3	1	2	1	1	11	10	5
32151039000	1	1	9	1	2	1	1	0	5	3	3	3	9	3	3	3	2	5	1	0	5	1	0	0	1	5	4	1	1	1	1	1	1	0	0	0	0	0	17	5	2	2	2	2	1	1	15	9	13
32151041000	0	0	8	1	2	1	1	0	5	4	4	3	11	4	3	4	1	1	1	0	1	1	0	0	0	2	1	1	1	1	0	0	0	0	0	0	0	0	7	3	3	1	2	1	3	1	14	11	4
32151042010	1	1	10	1	3	0	0	0	4	2	2	2	6	1	2	2	1	1	1	0	1	1	0	0	1	2	1	1	1	1	0	1	0	0	0	1	0	1	11	2	3	1	1	2	2	1	12	5	4
32151043000	0	0	3	1	0	1	1	0	3	3	4	3	10	4	1	2	2	1	1	0	1	1	0	1	1	2	1	1	1	1	1	1	1	0	0	0	1	1	14	3	2	2	2	2	1	2	14	7	5
32151044010	0	1	3	1	7	1	1	1	11	3	3	3	9	4	3	4	2	1	1	0	1	1	0	0	1	2	1	1	1	1	0	0	0	0	0	0	0	0	8	3	3	3	1	2	2	1	15	11	5
32151045000	0	0	1	1	0	0	1	0	2	3	3	3	9	2	2	2	2	5	2	0	2	2	0	0	0	2	2	1	2	2	0	1	0	0	0	0	0	0	12	4	3	2	6	5	2	2	24	6	11
32151046000	0	0	2	1	1	1	1	1	5	2	2	2	6	3	1	2	4	2	2	0	1	2	0	1	1	5	2	1	5	1	0	1	1	1	0	0	0	0	21	5	3	3	4	4	6	4	29	6	9
32151048000	0	0	5	1	1	1	1	1	5	2	3	3	8	4	3	3	2	3	1	0	3	1	0	0	0	5	1	1	1	2	0	1	0	0	0	0	1	0	13	5	4	1	3	3	3	1	20	10	9
32151049010	0	0	6	1	0	0	1	0	2	1	1	1	3	1	1	1	1	1	1	0	1	1	0	0	0	1	1	1	1	1	0	0	0	0	0	0	0	0	6	2	1	1	1	2	1	1	9	3	4
32151050000	0	0	6	0	0	1	1	0	2	3	4	3	10	4	4	3	2	3	2	0	3	1	0	0	0	4	1	1	2	1	0	0	0	0	0	0	0	0	10	6	2	1	2	2	2	1	16	11	10
32151051000	0	0	3	1	0	0	0	0	1	1	1	1	3	1	3	1	1	1	1	0	1	1	0	0	0	2	1	1	2	1	0	0	0	0	0	0	0	0	8	3	1	1	1	2	1	1	10	5	4
32151053010	1	0	4	0	0	1	0	0	1	4	4	4	12	4	1	1	1	1	1	0	1	1	0	0	0	4	1	1	1	1	0	0	1	0	0	0	0	1	11	6	3	1	1	2	3	1	17	6	4
32151054010	0	0	11	1	0	0	1	0	2	1	3	1	5	5	2	5	1	1	1	0	1	1	0	0	0	2	1	1	1	1	0	1	0	0	0	0	0	0	8	2	1	1	1	2	1	1	9	12	4
32151055000	0	0	18	1	5	1	1	0	8	3	4	3	10	3	3	2	2	4	2	0	3	2	0	0	0	5	2	1	1	1	0	1	1	0	0	0	0	1	15	6	4	2	1	5	1	4	23	8	11
32151058000	0	0	10	1	7	1	1	0	10	3	3	3	9	3	2	4	4	3	1	0	1	1	0	0	0	1	1	1	1	1	0	1	0	0	0	0	0	1	8	6	5	6	3	1	2	1	24	9	9
32151059010	0	0	3	0	0	1	1	0	2	3	4	3	10	3	3	3	2	3	1	0	1	1	0	0	1	2	2	1	1	2	0	0	0	0	0	0	0	0	10	3	2	3	2	2	3	2	17	9	7
32151060010	1	0	7	1	2	1	1	0	5	3	3	3	9	3	1	2	2	2	1	0	1	1	0	1	0	5	1	1	1	1	0	0	0	0	0	0	0	0	11	6	3	2	2	3	2	1	19	6	6
32151061000	0	0	8	1	3	1	1	0	6	1	1	3	5	1	1	3	3	3	3	0	1	2	0	0	0	2	2	1	1	1	0	1	1	0	0	0	0	0	11	3	2	3	1	2	4	3	18	5	10
32151063000	0	0	1	1	7	1	1	1	11	5	5	5	15	5	5	5	3	4	1	0	1	1	0	0	0	5	2	1	1	2	0	1	1	0	0	0	0	0	14	6	4	4	4	3	2	1	24	15	9
32151064010	1	0	5	1	2	1	1	1	6	2	4	1	7	1	3	4	1	1	1	0	1	1	0	0	0	2	1	1	1	1	0	1	1	0	0	0	0	0	9	2	2	1	2	1	2	2	12	8	4
32151065000	0	0	8	1	7	1	1	1	11	2	3	3	8	4	2	4	3	1	1	0	3	2	0	0	0	2	1	1	2	3	0	0	0	0	0	0	0	0	11	4	4	1	2	3	1	2	17	10	8
32151067000	0	0	6	0	1	1	0	0	2	3	3	3	9	4	1	4	1	2	1	0	1	1	0	0	0	3	1	1	1	1	0	1	1	0	0	1	0	0	11	4	3	2	2	1	1	1	14	9	5
32151069000	1	1	9	1	6	1	1	1	10	3	3	3	9	3	3	3	3	4	2	0	3	2	0	0	0	5	4	1	3	2	1	1	1	0	0	0	0	1	21	5	5	2	3	3	1	1	20	9	12
32151070010	1	1	5	1	6	1	1	0	9	3	3	2	8	3	2	1	1	1	1	0	1	2	0	1	0	4	1	1	1	5	1	1	0	0	0	0	0	0	17	6	5	1	2	2	1	1	18	6	4
32151072000	1	0	8	1	5	1	1	0	8	5	5	5	15	5	3	2	1	2	1	0	1	1	0	0	0	3	2	1	1	1	0	0	1	0	0	0	0	0	10	3	2	1	2	2	1	1	12	10	5
32151073010	0	0	1	1	2	1	1	0	5	3	3	2	8	3	3	3	1	5	1	0	1	1	0	0	0	4	1	1	1	1	0	1	0	0	0	0	0	1	11	2	3	3	1	3	1	1	14	9	8
32151075000	0	0	2	1	2	1	1	0	5	1	1	1	3	1	4	4	2	2	1	0	1	1	0	0	1	2	1	1	1	1	0	1	0	0	0	0	0	0	9	6	2	1	1	2	1	1	14	9	6
32151076000	0	0	6	1	6	1	1	0	9	4	5	4	13	3	3	3	3	3	1	0	1	1	0	0	0	2	2	1	1	1	0	1	1	1	0	1	0	1	13	6	4	1	2	3	4	1	21	9	8
32151077100	0	0	3	0	2	1	1	0	4	3	3	2	8	4	2	3	1	3	1	0	1	1	0	0	0	2	3	1	1	1	0	1	0	0	0	0	0	0	10	5	2	1	2	2	4	1	17	9	6
32151080000	1	1	8	0	0	0	0	0	0	1	3	2	6	4	1	1	3	1	1	0	1	1	0	0	0	2	2	2	1	1	0	0	0	0	0	0	0	1	10	3	2	2	2	2	2	3	16	6	6
32151082000	1	0	3	1	2	0	1	1	5	2	3	4	9	4	3	3	2	3	1	0	1	1	0	1	0	2	1	1	1	1	0	1	0	0	0	0	0	0	9	4	3	1	2	3	1	1	15	10	7
32151084000	1	0	3	0	0	0	0	0	0	1	1	2	4	3	2	2	2	5	1	0	1	1	0	0	0	3	1	1	1	1	0	1	1	0	0	0	0	0	10	6	4	3	1	3	1	1	19	7	9
32151085000	1	0	7	1	1	1	1	0	4	3	3	2	8	1	1	1	2	3	1	0	1	2	0	0	0	1	1	1	1	1	0	0	1	0	0	0	0	0	8	6	3	2	3	2	1	3	20	3	7
32151086010	1	0	4	1	2	1	1	1	6	1	3	2	6	1	3	3	1	2	1	0	1	2	0	0	0	2	1	1	1	1	0	0	0	0	0	0	0	0	8	2	2	1	1	1	2	1	10	7	5
32151087000	1	0	4	1	0	1	0	0	2	3	3	3	9	3	3	3	1	1	1	1	1	1	0	0	0	3	2	1	1	3	0	1	0	0	0	0	0	1	13	4	2	4	3	2	3	1	19	9	5
32151088010	1	0	3	0	1	0	1	0	2	3	3	4	10	1	3	3	1	3	1	0	1	1	0	0	0	3	1	1	1	1	0	1	0	0	0	0	0	1	10	3	1	1	1	3	2	1	12	7	6
32151089000	0	0	3	1	1	1	1	0	4	3	4	4	11	4	4	2	1	1	1	0	1	1	0	0	0	3	2	1	1	1	0	1	1	0	0	0	0	0	11	6	4	1	1	5	1	1	19	10	4
32151091000	0	0	3	1	4	1	1	0	7	1	2	2	5	4	1	1	3	1	1	0	1	1	0	0	0	2	1	1	3	1	0	1	1	0	0	0	0	1	12	5	3	4	1	2	2	3	20	6	6
32151002111-10007	0	0	4	1	1	1	1	0	4	3	2	3	8	3	1	1	1	2	1	0	1	1	0	0	0	2	1	1	1	1	0	1	0	0	0	0	0	0	8	3	2	1	1	3	3	2	15	5	5
32151004011-22503	0	0	5	1	7	1	1	1	11	2	4	3	9	1	2	3	1	2	1	0	1	1	0	0	0	2	1	1	1	1	0	0	0	0	0	0	0	0	7	6	2	1	1	2	1	1	14	6	5
32151008101-21606	1	0	3	0	1	1	0	0	2	3	3	3	9	4	1	2	2	1	1	0	1	2	0	0	0	2	3	1	1	1	0	1	1	0	0	0	0	0	12	4	5	1	2	2	5	1	20	7	5
32151009001-22503	0	0	4	1	2	1	0	0	4	3	3	3	9	4	4	4	1	3	2	0	1	1	0	0	0	5	3	1	1	3	0	1	1	0	0	0	1	0	17	5	3	1	1	2	2	1	15	12	7
32151010102-21605-21606	1	1	3	0	1	1	0	0	2	2	3	3	8	2	4	3	2	3	2	0	1	2	0	0	0	3	3	1	1	2	0	1	1	0	0	0	0	0	14	5	3	3	3	3	4	1	22	9	8
32151012002-20702-20703	0	0	7	1	2	1	1	0	5	3	3	2	8	2	3	3	1	1	1	0	1	1	0	0	0	1	1	1	1	2	0	0	1	0	0	0	0	1	9	6	3	1	1	2	2	1	16	8	4
32151013001-10007	1	0	8	1	3	1	1	1	7	3	3	2	8	3	1	2	1	1	1	0	1	1	0	0	0	3	1	1	1	1	0	0	0	0	0	0	0	0	8	6	2	3	2	2	3	1	19	6	4
32151017001-22503	0	0	5	1	0	1	1	1	4	4	4	3	11	4	3	1	2	1	1	0	1	1	0	0	1	2	1	1	1	5	1	0	0	0	0	0	0	1	14	5	3	3	1	1	3	1	17	8	5
32151018001-10007	0	0	2	1	0	1	0	0	2	3	3	3	9	4	2	2	2	3	1	0	3	1	0	0	0	3	2	1	1	2	0	0	0	0	0	0	0	1	11	5	2	1	2	3	2	2	17	8	9
32151020001-10007	1	1	6	1	2	1	1	0	5	5	5	5	15	5	5	5	3	4	2	1	2	2	0	0	1	4	1	2	3	1	1	1	1	0	0	0	0	1	18	2	2	1	1	3	2	1	12	15	12
32151022111-22304	0	0	2	1	2	1	1	0	5	3	3	1	7	3	1	3	1	2	1	0	1	1	0	0	0	1	1	1	1	1	0	1	0	0	0	0	0	0	7	3	1.55587	1	1	1	1	1	9.55587	7	5
32151024001-10009	0	0	#NULL!	1	6	1	1	0	9	3	3	3	9	2	4	2	1	1	1	0	1	1	0	0	0	1	2	2	1	5	0	1	1	0	0	0	0	1	15	6	3	1	2	1	1	1	15	8	4
32151026003-22503-22703-22806	1	1	9	1	4	1	1	1	8	3	3	3	9	3	1	2	1	3	1.27145	0	1	1	0	0	0	4	1.78251	1	1	1	0	1	1	0	0	0	0	0	11.7825	6	3	3	2	4	1	6	25	6	6.27145
32151028101-22503	0	0	5	1	3	1	1	1	7	3	1	1	5	4	3	5	3	1	2	0	1	1	0	0	0	2	1	1	1	2	0	0	0	0	0	0	0	1	9	5	3	5	5	1	1	4	24	12	7
32151030011-22503	1	1	2	1	3	1	1	1	7	3	3	2	8	1	3	1	1	1	1	0	1	2	0	0	0	1	1	1	1	2	0	1	0	0	0	0	0	1	10	4	2	1	1	1	4	1	14	5	4
32151032011-22503	1	0	1	0	0	1	0	1	2	3	3	3	9	5	1	3	2	4	1	0	1	1	0	0	1	4	1	1	1	1	0	1	1	0	0	0	0	0	12	4	4	2	1	2	1	1	15	9	8
32151033001-21606	0	0	2	1	0	1	0	0	2	3	3	2	8	4	2	3	3	1	1	0	2	1	1	0	1	2	1	1	1	1	0	0	0	0	0	0	0	1	10	6	3	3	2	3	2	1	20	9	7
32151036003-10009-21606-22503	0	0	#NULL!	0	0	1	0	0	1	4	3	2	9	5	2	3	1	3	1	0	1	1	0	0	1	3	1	1	1	2	0	0	0	0	0	0	0	0	10	6	4	3	2	2	3	1	21	10	6
32151037001-10011	1	0	1	1	1	1	1	0	4	3	3	2	8	5	3	2	2	3	1	0	1	1	0	0	0	5	5	1	1	1	0	1	1	0	0	1	0	0	17	5	2	2	2	3	1	1	16	10	7
32151040011-22503	1	1	5	0	0	1	1	0	2	3	3	3	9	3	3	3	3	3	2	1	3	3	0	0	0	2	1	1	1	1	0	0	0	0	0	0	0	1	10	3	1	1	1	1	2	1	10	9	12
32151047111-22505	0	0	2	1	1	1	1	1	5	1	2	1	4	1	3	1	1	1	1	0	1	1	0	0	0	2	1	1	1	1	0	0	0	0	0	0	0	0	7	1	2	1	1	2	1	1	9	5	4
32151052001-22802	1	0	1	0	1	0	0	1	2	3	3	3	9	4	3	4	1	2	1	0	1	1	-0.053121	0	0	2	1	1	1	1	0	1	1	0	0	0	0	0	8.94688	2	2	1	1	1	1	1	9	11	5
32151056001-22703	1	0	5	0	1	0	0	0	1	4	5	4	13	4	1	1	3	5	0.983613	0	1	1	0	0	0	1	1	1	1	5	0	1	1	0	0	0	0	0	12	6	5	1	2	2	6	1	23	6	9.98361
32151057001-21606	0	1	4	0	0	0	0	0	0	3	3	3	9	1	2	2	1	2	1	0	1	1	0	0	0	1	2	1	1	1	0	1	0	0	0	0	0	0	8	2	2	6	1	1	2	1	15	5	5
32151062001-22506	1	0	3	1	5	1	1	1	9	3	2	3	8	1	1	1	2	1	1	0	1	1	0	0	0	4	1	1	1	1	0	1	1	0	0	0	0	0	11	2	2	1	2	3	2	2	14	3	5
32151066012-21606-22503	0	0	11	1	2	1	0	0	4	2	3	2	7	3	1	3	1	1	1	0	1	1	0	0	0	2	1	1	1	1	0	0	0	0	0	0	0	0	7	6	3	1	3	3	3	1	20	7	4
32151068001-22503	0	0	7	1	0	0	0	1	2	2	1	3	6	1	1	1	2	1	1	0	2	1	0	0	0	3	1	1	1	2	0	0	0	0	0	0	0	0	9	4	2	2	1	3	3	1	16	3	6
32151071011-21606	1	0	4	1	1	1	1	0	4	4	3	2	9	2	1	1	3	1	1	0	1	1	0	0	0	4	1	1	1	1	0	0	0	0	0	0	0	1	10	6	4	1	1	2	2	1	17	4	6
32151074011-10009	1	0	#NULL!	1	0	1	0	0	2	2	2	2	6	3	4	1	1	2	1	0	1	1	0	0	0	2	1	1	1	1	0	0	0	0	0	0	0	0	7	2	2	2	1	2	1	1	11	8	5
32151078001-22503	0	0	3	1	2	1	1	0	5	3	3	3	9	2	1	2	2	1	1	0	1	1	0	1	0	1	1	1	1	1	1	1	1	0	0	0	0	1	11	5	3	5	6	1	4	2	26	5	5
32151079001-22503	0	0	6	1	4	1	1	0	7	2	3	2	7	4	5	3	3	2	1	0	3	1	0	0	1	2	1	1	1	2	1	0	0	0	0	1	0	1	12	6	4	3	3	3	3	3	25	12	9
32151081001-22503	0	0	3	1	3	1	1	1	7	4	4	4	12	3	3	3	4	5	2	0	2	1	1	1	1	3	1	1	1	1	0	1	1	0	0	0	0	1	14	3	4	1	2	2	2	1	15	9	13
32151083001-10007	0	0	5	1	7	1	1	0	10	4	5	3	12	4	2	2	2	1	2	0	2	2	0	0	0	1	2	1	1	2	0	1	0	0	0	0	0	1	11	6	3	6	2	1	6	1	25	8	7
32151090001-21301	0	0	4	1	2	1	1	0	5	3	2	1	6	3	2	2	3	2	3	1	2	3	1	0	0	3	2	1	2	2	0	0	0	0	0	0	0	0	14	3.36232	2	2	5	1	3.57568	5	21.938	7	11
51162001010	0	0	3	1	1	0	0	0	2	3	4	4	11	4	1	1	3	1	1	0	1	1	0	0	0	2	2	1	1	5	0	1	0	0	0	0	0	1	14	4	3	1	1	2	2	2	15	6	6
51162003000	1	1	6	1	2	1	1	0	5	3	5	3	11	3	3	1	2	1	1	0	1	1	0	0	0	5	3	1	1	1	0	0	0	0	0	0	0	1	13	5	5	3	2	6	6	1	28	7	5
51162004000	1	0	5	1	4	1	1	1	8	3	3	3	9	3	2	1	2	3	1	0	1	1	0	1	1	5	1	1	1	4	0	0	1	0	0	0	0	0	16	3	3	1	1	2	1	1	12	6	7
51162006000	1	0	3	0	1	0	0	0	1	3	4	3	10	4	5	5	2	1	1	0	5	2	0	1	0	2	1	2	1	1	0	1	1	0	0	0	0	0	12	5	3	6	2	2	2	2	22	14	9
51162007000	0	0	3	1	1	0	1	1	4	1	1	1	3	2	1	2	1	1	1	0	1	1	0	0	0	1	1	1	1	1	0	0	0	0	0	0	0	0	6	1	1	1	1	1	1	1	7	5	4
51162008000	0	0	2	1	4	0	1	1	7	3	3	4	10	3	2	2	2	1	1	0	1	1	0	0	1	2	2	1	1	1	0	1	1	0	0	0	0	1	12	6	5	2	2	4	2	1	22	7	5
51162010000	1	1	8	0	1	1	1	0	3	1	2	2	5	2	1	1	1	2	1	0	1	1	0	1	0	1	2	1	1	1	0	0	0	0	0	0	0	0	8	3	2	1	2	2	2	1	13	4	5
51162011010	1	1	12	1	3	1	1	0	6	3	2	2	7	4	3	3	1	2	1	0	1	1	0	0	1	4	2	1	1	1	0	1	1	0	0	0	0	0	13	4	2	1	1	2	3	1	14	10	5
51162012000	0	0	3	1	7	1	1	0	10	2	3	3	8	2	3	2	1	1	2	0	3	3	0	0	0	1	1	1	2	3	1	1	0	1	0	0	0	0	14	2	2	2	2	1	1	1	11	7	7
51162013000	1	0	12	0	0	0	0	0	0	3	3	3	9	3	2	3	3	1	1	0	1	1	0	1	0	1	2	1	1	1	0	1	0	0	0	0	0	0	9	4	1	1	1	2	5	1	15	8	6
51162014010	1	0	9	1	0	1	1	0	3	2	1	2	5	3	1	2	2	1	1	0	1	1	0	0	0	3	2	1	1	1	0	1	0	0	0	0	0	0	10	5	2	2	2	4	4	1	20	6	5
51162015000	1	0	2	1	1	1	1	0	4	3	3	3	9	4	4	4	1	5	1	0	1	1	0	0	0	5	2	1	1	1	0	1	0	0	0	0	0	0	12	6	3	1	5	6	4	1	26	12	8
51162016000	1	1	15	0	1	1	1	0	3	3	3	4	10	3	2	2	2	3	1	0	1	1	0	0	0	3	1	1	1	1	0	1	0	0	0	1	0	0	10	6	4	2	2	3	5	1	23	7	7
51162018000	0	0	16	1	7	1	1	0	10	2	3	3	8	2	1	2	1	1	1	0	1	1	0	0	0	1	1	1	1	1	0	0	0	0	0	1	0	1	8	5	3	2	2	2	5	2	21	5	4
51162019000	0	0	5	1	4	1	1	0	7	3	3	2	8	4	3	4	1	2	1	0	1	2	0	1	0	2	1	1	1	1	0	0	1	0	0	0	0	0	10	5	3	3	3	3	4	1	22	11	5
51162020010	0	0	8	1	1	1	1	1	5	3	3	3	9	5	3	5	1	1	1	0	1	1	0	0	0	2	1	1	1	1	0	0	0	0	0	0	0	0	7	1	1	1	2	2	2	1	10	13	4
51162021000	0	0	4	1	3	1	1	1	7	5	5	5	15	1	3	1	1	2	1	0	1	1	0	0	0	2	2	1	1	1	0	1	0	0	0	1	0	0	10	4	2	1	1	3	4	1	16	5	5
51162025000	1	1	13	0	2	1	0	0	3	4	4	3	11	4	3	3	1	3	1	0	1	2	0	0	1	2	3	1	1	1	0	0	0	0	0	1	0	0	12	2	2	1	2	2	3	1	13	10	6
51162026000	0	0	1	1	0	1	1	0	3	3	3	3	9	4	2	3	1	1	1	0	1	1	0	0	0	1	1	1	1	1	0	0	0	0	0	0	0	0	6	4	3	1	2	2	1	1	14	9	4
51162029010	0	0	4	1	4	1	1	1	8	3	3	3	9	2	3	2	2	3	1	0	2	2	0	0	0	1	3	1	2	1	1	1	0	0	0	0	0	1	13	4	2	1	2	2	3	2	16	7	8
51162030000	1	1	8	1	4	1	1	0	7	2	2	2	6	4	3	4	3	5	1	0	3	2	0	0	0	3	5	2	2	2	0	0	1	0	0	0	0	1	18	6	4	6	2	3	2	2	25	11	12
51162031000	1	1	8	1	1	1	1	1	5	1	2	1	4	4	2	3	3	1	1	0	1	1	0	0	0	2	1	1	1	5	0	1	0	0	0	0	0	1	13	5	2	1	2	2	5	1	18	9	6
51162033010	0	0	5	1	1	1	0	0	3	1	1	1	3	1	3	1	2	5	1	0	1	1	0	0	0	1	2	1	1	1	0	0	0	0	0	0	0	0	7	6	4	1	2	1	1	1	16	5	9
51162040000	1	0	7	1	0	0	0	1	2	3	4	3	10	4	2	3	2	1	1	0	1	1	0	0	0	2	2	1	1	1	0	0	0	0	0	0	0	0	8	4	3	1	1	2	2	1	14	9	5
51162041010	0	0	2	1	2	1	0	0	4	3	4	3	10	3	3	1	3	1	1	0	1	1	0	0	0	1	3	1	1	5	0	0	1	0	0	0	0	0	13	2	3	1	1	2	2	1	12	7	6
51162042010	0	0	5	1	0	0	1	0	2	2	3	3	8	3	1	2	2	1	1	0	1	1	0	0	0	1	1	1	1	1	0	0	0	0	0	0	0	0	6	2	2	1	1	1	2	1	10	6	5
51162043000	1	0	2	1	3	1	1	0	6	3	3	3	9	4	3	4	2	3	1	0	1	1	0	1	1	2	2	1	1	1	0	1	0	0	0	0	0	0	11	4	2	3	1	2	2	1	15	11	7
51162046010	0	0	4	0	1	1	1	0	3	1	2	2	5	4	1	3	1	1	1	0	1	2	0	0	0	1	2	1	1	1	0	0	0	0	0	0	0	0	8	3	2	1	1	2	2	1	12	8	4
51162047000	0	0	7	1	1	1	1	0	4	2	2	3	7	4	4	4	2	1	2	0	1	1	0	0	0	1	1	1	1	1	0	1	1	0	0	0	0	0	8	4	2	2	1	2	6	1	18	12	6
51162049010	1	0	4	0	3	0	1	0	4	3	3	3	9	3	3	1	3	2	1	0	1	1	0	0	0	5	3	1	1	1	0	0	0	0	0	0	0	0	12	3	1	2	2	1	1	2	12	7	7
51162050000	1	1	20	1	6	1	1	1	10	3	3	3	9	4	1	2	3	2	1	0	2	2	0	0	0	1	1	1	1	1	0	1	1	0	0	0	0	1	10	2	3	3	2	2	2	2	16	7	8
51162051000	0	0	6	1	4	1	1	0	7	1	1	3	5	3	3	3	2	1	2	0	1	1	0	0	0	3	1	1	1	1	0	1	0	0	0	0	0	1	10	5	4	1	1	3	3	1	18	9	6
51162052000	1	0	2	1	2	1	0	1	5	1	1	1	3	1	2	1	1	2	1	0	1	1	0	0	0	2	1	1	1	1	0	0	0	0	0	0	0	0	7	3	3	2	2	1	1	1	13	4	5
51162053000	0	0	1	0	1	1	1	0	3	1	1	1	3	1	1	3	1	1	1	0	3	2	0	1	1	1	3	1	1	1	0	0	0	0	0	0	0	0	11	4	2	4	6	1	2	2	21	5	6
51162054000	1	1	11	1	5	1	1	1	9	3	3	2	8	4	3	3	1	2	1	0	2	2	0	1	1	2	2	1	1	2	0	0	1	0	0	0	0	1	14	5	3	2	3	1	6	2	22	10	6
51162056000	0	0	6	1	1	1	1	1	5	2	2	2	6	4	3	2	1	2	1	0	1	1	0	1	1	1	1	1	1	1	0	0	0	0	0	0	0	0	8	6	3	3	3	1	2	3	21	9	5
51162057000	0	0	6	1	6	1	1	0	9	2	2	2	6	3	1	1	2	1	1	0	1	1	0	0	1	2	1	1	1	1	0	1	0	0	0	0	0	1	10	5	3	6	2	3	2	2	23	5	5
51162058000	0	0	6	1	2	0	0	0	3	1	1	2	4	3	3	2	1	1	1	0	1	1	0	0	0	2	2	1	1	1	0	1	0	0	0	0	0	1	10	4	3	1	1	3	3	1	16	8	4
51162060000	0	0	5	1	5	1	1	0	8	3	3	3	9	4	4	5	4	2	1	0	5	1	0	0	0	4	2	2	5	5	0	1	1	0	0	0	0	0	21	4	3	5	2	3	6	2	25	13	12
51162061010	0	0	2	1	7	1	1	0	10	3	3	3	9	3	4	4	1	3	1	0	1	1	0	0	0	2	2	1	1	1	0	0	0	0	0	0	0	1	9	5	3	1	2	2	4	1	18	11	6
51162062010	0	0	6	1	4	1	1	1	8	2	3	4	9	3	2	3	3	3	2	0	1	1	0	0	0	2	3	1	1	1	0	0	0	0	0	0	0	1	10	5	2	3	1	3	1	1	16	8	9
51162063000	0	0	6	1	7	1	1	0	10	1	3	2	6	3	1	3	1	1	1	0	1	2	0	0	0	1	3	1	1	5	0	1	0	0	0	0	0	1	15	6	3	1	3	2	2	1	18	7	4
51162065000	0	0	3	1	1	1	1	0	4	1	1	1	3	2	2	2	1	1	1	0	1	2	0	0	0	1	1	1	1	1	0	1	0	0	0	0	0	0	8	5	2	1	1	3	1	1	14	6	4
51162066000	1	0	1	0	7	1	1	1	10	3	4	5	12	3	2	3	1	1	1	0	1	1	0	0	0	3	1	1	1	1	0	1	0	0	0	0	0	1	10	4	3	1	1	2	5	1	17	8	4
51162067000	0	0	6	1	4	1	1	0	7	3	3	3	9	4	3	2	2	4	1	0	5	1	0	0	0	1	1	1	1	1	0	1	0	0	0	0	0	0	7	2	2	1	4	1	2	1	13	9	12
51162069000	0	0	11	1	0	1	1	0	3	3	3	3	9	3	1	3	1	1	1	0	1	1	0	0	0	1	2	1	1	1	0	0	0	0	0	0	0	1	8	6	2	1	1	1	2	1	14	7	4
51162071000	1	0	7	1	6	1	1	1	10	2	3	3	8	3	3	3	1	2	1	0	1	1	0	0	0	2	2	1	1	1	0	0	1	1	0	0	0	0	10	4	2	1	1	2	1	1	12	9	5
51162072000	1	1	8	1	6	1	1	0	9	2	2	2	6	1	3	1	2	1	1	0	1	1	0	0	0	2	1	1	1	2	0	1	1	0	0	0	0	1	11	6	4	1	5	6	2	1	25	5	5
51162075000	1	0	10	1	1	1	0	0	3	3	3	3	9	3	3	1	2	1	1	0	1	1	0	0	0	1	2	1	2	1	0	0	0	0	0	0	0	1	9	2	2	2	2	2	2	1	13	7	5
51162076000	1	0	10	1	2	0	1	0	4	2	2	2	6	3	2	2	1	1	1	0	1	1	0	0	0	3	2	1	1	1	0	0	0	0	0	0	0	0	9	5	3	4	3	3	4	1	23	7	4
51162077000	1	0	5	0	2	0	1	0	3	3	4	4	11	3	4	4	2	3	4	1	3	2	0	0	1	2	3	1	2	1	0	1	0	0	0	1	0	1	15	5	4	1	4	3	2	2	21	11	13
51162078010	0	0	10	1	5	1	0	0	7	5	1	3	9	5	1	1	1	1	1	0	1	1	0	0	0	1	3	1	1	1	0	0	0	0	0	0	0	0	8	6	3	1	1	1	3	1	16	7	4
51162080000	0	0	3	0	1	1	1	0	3	2	2	3	7	2	4	4	1	1	1	0	1	1	0	0	0	1	1	1	1	1	0	0	0	0	0	0	0	0	6	4	2	1	1	1	4	1	14	10	4
51162081000	0	1	5	1	7	1	1	0	10	4	4	4	12	4	2	2	1	1	1	0	1	1	0	0	1	1	2	1	1	1	0	0	0	0	0	0	0	0	8	6	3	2	5	1	2	1	20	8	4
51162082000	0	0	7	1	0	1	0	0	2	1	2	1	4	3	2	2	1	1	1	0	1	1	0	0	0	1	2	1	1	1	0	0	0	0	0	0	0	0	7	2	2	1	2	1	2	1	11	7	4
51162083000	1	1	5	1	4	1	1	0	7	1	1	3	5	1	1	1	1	1	1	0	1	1	0	0	0	3	2	1	1	1	1	0	1	1	1	0	1	1	15	2	1	1	2	2	2	1	11	3	4
51162084000	1	0	2	1	2	0	1	0	4	3	3	3	9	4	2	4	3	2	1	0	3	2	0	0	0	3	2	1	1	1	1	1	0	0	0	0	0	0	12	6	3	2	2	4	6	3	26	10	9
51162085000	1	0	2	1	3	0	1	0	5	2	2	2	6	3	3	1	1	2	1	0	1	1	0	0	0	2	1	1	1	1	0	0	0	0	0	0	0	1	8	2	3	2	1	4	4	1	17	7	5
51162087000	1	1	6	0	0	1	1	0	2	3	2	4	9	5	3	3	1	1	1	0	1	1	0	0	0	2	2	1	1	1	0	0	0	0	0	0	0	0	8	2	3	4	1	2	6	1	19	11	4
51162088000	0	0	18	0	3	1	0	0	4	3	3	2	8	3	2	3	2	2	1	0	1	1	0	0	0	2	2	1	1	1	1	1	1	0	0	0	0	1	12	5	3	1	4	3	3	1	20	8	6
51162089000	1	1	20	1	3	1	1	0	6	4	4	3	11	4	2	3	2	1	2	0	5	2	0	0	0	2	1	1	1	2	0	1	0	0	0	0	0	1	11	6	3	5	4	4	2	3	27	9	10
51162090000	1	0	6	0	0	1	1	0	2	1	3	2	6	3	2	2	3	1	1	0	1	1	0	0	1	5	2	1	1	1	0	1	1	0	0	0	0	0	14	4	2	1	2	2	2	1	14	7	6
51162092000	0	0	2	0	2	1	0	0	3	1	1	2	4	3	2	2	1	1	1	0	1	1	0	1	0	1	2	1	1	1	0	0	0	0	0	0	0	0	8	6	3	4	1	1	1	1	17	7	4
51162093010	1	1	5	0	4	1	1	0	6	3	3	3	9	3	2	3	1	2	1	0	1	1	0	0	0	2	1	1	1	1	0	0	0	0	0	0	0	0	7	3	2	1	1	1	2	1	11	8	5
51162094010	0	0	4	1	7	1	1	0	10	3	3	3	9	2	2	2	1	1	1	0	1	1	0	0	1	1	1	1	1	1	0	1	0	0	0	0	0	1	9	5	3	1	3	4	4	1	21	6	4
51162095000	0	0	5	0	0	0	0	0	0	2	2	3	7	3	3	3	1	2	1	0	1	1	0	0	0	2	1	1	1	1	0	1	0	0	0	0	0	1	9	5	3	3	3	3	2	1	20	9	5
51162096000	0	0	7	1	2	1	0	0	4	2	3	3	8	1	1	1	1	1	1	0	1	2	0	0	1	3	1	1	1	1	0	0	0	0	0	0	0	0	10	5	2	1	2	3	5	1	19	3	4
51162097000	0	1	6	1	6	1	1	1	10	4	4	3	11	4	1	1	2	5	1	0	1	2	0	0	0	1	2	1	1	2	0	0	0	0	0	0	0	0	9	6	2	1	2	2	4	1	18	6	9
51162098010	0	0	2	1	0	0	0	0	1	2	3	2	7	3	1	4	1	1	1	0	1	1	0	0	0	1	2	1	1	1	0	0	0	0	0	0	0	0	7	4	2	1	2	2	2	1	14	8	4
51162099000	1	0	6	1	0	1	0	0	2	3	1	3	7	4	3	3	2	3	1	0	1	1	0	0	0	2	2	1	1	1	0	0	0	0	0	0	0	0	8	2	3	1	2	2	6	1	17	10	7
51162100010	1	1	4	1	2	1	1	1	6	5	5	5	15	5	4	1	2	1	1	0	1	1	0	0	0	4	1	1	1	1	0	1	0	0	0	0	0	0	10	6	3	1	2	4	1	1	18	10	5
51162101000	0	1	4	1	3	1	1	0	6	3	3	4	10	4	3	4	1	1	2	0	2	1	0	0	0	2	1	1	1	1	0	1	1	0	0	0	0	0	9	4	2	1	3	2	5	1	18	11	6
51162102000	0	0	3	1	5	1	0	1	8	3	3	3	9	3	3	1	1	2	1	0	1	1	0	0	1	2	1	1	1	1	1	1	0	0	0	0	0	1	11	4	2	2	1	4	2	1	16	7	5
51162103010	1	1	3	0	6	1	1	0	8	2	5	3	10	5	5	5	3	1	1	0	1	1	0	0	0	1	2	1	1	1	0	1	1	0	0	0	0	0	9	6	3	1	1	1	6	1	19	15	6
51162104100	0	0	2	1	1	1	1	0	4	2	3	3	8	3	2	3	1	1	1	0	1	1	0	0	0	5	3	1	1	2	0	1	1	0	0	0	0	1	16	4	3	1	3	2	4	1	18	8	4
51162002001-22503	1	0	1	1	0	0	0	0	1	3	3	3	9	3	3	3	2	1	1	0	1	1	0	0	0	1	2	1	1	1	1	0	0	0	0	0	0	1	9	5	2	6	3	6	2	1	25	9	5
51162005001-22505	0	0	14	1	1	1	1	1	5	3	1	2	6	3	3	3	3	1	1	0	1	1	0	0	0	3	4	1	1	1	0	1	1	0	0	0	0	1	14	4	2	2	1	1	4	1	15	9	6
51162009001-22503	1	1	7	1	4	1	1	0	7	2	2	2	6	3	2	2	2	2	1	0	1	1	0	0	0	2	2	1	1	5	0	0	0	0	0	0	0	0	12	4	2	3	1	1	1	1	13	7	6
51162017011-22503	0	0	13	0	5	1	1	0	7	2	3	3	8	4	3	3	2	3	2	0	1	1	0	0	0	3	1	1	1	1	0	1	0	0	0	0	0	0	9	1	1	1	1	1	3	1	9	10	8
51162022011-10007	0	0	10	0	6	1	1	1	9	5	5	5	15	5	1	1	1	1	1	0	1	1	0	0	0	2	2	1	1	1	0	1	0	0	0	0	0	1	10	6	2	1	1	6	2	1	19	7	4
51162023001-10007	1	1	15	1	4	1	1	1	8	2	3	3	8	4	2	3	1	1	1	0	1	1	0	0	0	1	1	1	1	1	0	0	0	0	0	0	0	0	6	3	2	1	1	4	4	1	16	9	4
51162024014-20401-20402-20403-21606	0	0	7	1	0	1	1	0	3	2	1	2	5	2.79621	2.51438	2.44099	2	1	1	0	1	1	0	0	0	1	1	1	1	1	0	1	0	0	0	0	0	1	8	4	2	1	1	1	4	1	14	7.75158	5
51162027002-10007-22703	1	1	3	1	0	1	1	0	3	3	3	3	9	3	3	3	3	5	2.26668	0	1	3	1	0	0	4	3	1	3	3	0	0	0	0	0	0	0	0	18	2	2	1	5	6	2	5	23	9	11.2667
51162028111-22503	0	0	3	1	4	1	1	1	8	1	1	1	3	3	1	1	2	2	1	0	1	1	0	0	1	1	2	1	1	1	0	1	0	0	0	0	0	0	9	4	3	2	2	2	1	1	15	5	6
51162032011-22503	1	1	14	0	0	0	1	0	1	3	3	3	9	4	4	1	2	1	1	0	1	1	0	1	1	2	2	1	1	1	0	1	1	0	0	0	0	1	13	2	2	2	2	2	4	1	15	9	5
51162034001-22503	1	0	2	0	2	0	1	0	3	2	3	1	6	4	2	1	3	1	1	0	1	1	0	0	0	2	1	1	1	1	0	1	1	0	0	0	0	0	9	3	3	5	1	2	1	1	16	7	6
51162035001-21203	0	0	2	1	0	1	1	0	3	5	2	5	12	3	4	4	1	2	1	0	1	1	0	0	0	1	1	1	1	1	0	1	0	0	0	0	0	1	8	5	3	4	1	1	1	1	16	11	5
51162036003-10009-10010-10011	1	1	#NULL!	1	2	0	1	0	4	4	4	4	12	4	3	4	3	1	1	0	1	2	0	0	1	2	2	1	1	2	0	0	0	0	0	0	0	1	12	2	1	1	1	2	3	1	11	11	6
51162037002-22204-22306	1	0	6	1	0	1	1	0	3	3	3	3	9	3	1	1	4	5	1	0	3	1	0	0	0	5	4	1	1	1	0	0	0	0	0	0	0	0	13	6	5	3	3.69996	5	6	1	29.7	5	13
51162038011-22503	1	0	10	1	1	1	0	0	3	3	3	3	9	3	3	3	3	3	1	0	1	1	0	1	1	2	2	1	1	1	0	0	1	0	0	0	0	1	12	5	2	1	2	3	2	1	16	9	8
51162039001-22503	0	0	1	1	2	1	1	0	5	3	3	3	9	3	3	3	2	1	1	0	1	2	0	0	0	1	1	1	1	1	0	0	0	0	0	0	0	0	7	4	2	1	1	1	3	1	13	9	5
51162044003-10008-10009-22503	0	0	#NULL!	0	3	1	1	0	5	2	3	1	6	1	1	2	2	2	1	0	1	1	0	0	0	2	2	1	1	1	0	0	0	0	0	0	0	0	8	4	3	1	2	2	2	3	17	4	6
51162045011-22503	1	0	7	1	1	1	1	0	4	2	2	3	7	2	1	2	2	1	1	0	1	2	0	1	0	2	3	1	1	3	0	0	1	0	0	0	0	1	15	3	2	1	3	1	2	1	13	5	5
51162048001-22503	1	0	8	0	2	1	1	0	4	3	3	2	8	2	4	4	1	2	1	0	1	1	0	0	0	2	2	1	1	1	0	1	1	0	0	0	0	1	11	2	2	6	2	2	5	1	20	10	5
51162055001-21606	0	0	20	1	7	1	1	0	10	3	5	5	13	5	2	4	1	5	1	0	1	1	0	0	0	1	2	1	1	1	0	1	0	0	0	0	0	0	8	6	3	1	6	1	2	1	20	11	8
51162059001-21801	0	0	7	1	4	1	1	0	7	2	2	3	7	3	4	2	1	1	1	0	1	1	0	0	0	1	1	1	1	1	0	0	0	0	0	0	0	0	6	6	4	1	4	2	3	1	21	9	4
51162064001-22503	0	0	3	1	0	1	1	0	3	4	3	4	11	4	4	5	4	1	1	0	1	4	1	0	0	4	1	1	5	5	1	0	1	0	0	0	0	1	24	4	4	5	3	6	5	5	32	13	7
51162068001-21606	0	0	5	1	7	1	1	0	10	2	3	2	7	3	2	1	1	1	1	0	1	1	0	0	1	2	2	1	1	1	0	1	0	0	0	0	0	0	10	5	3	2	1	2	4	1	18	6	4
51162070011-22503	1	0	14	1	1	1	1	0	4	3	3	3	9	1	2	3	1	1	1	0	1	1	0	0	1	3	2	1	1	1	1	1	1	0	0	0	0	1	14	6	3	1	4	4	6	1	25	6	4
51162073001-10007	1	0	5	1	1	0	1	1	4	4	3	3	10	3	1	2	1	2	1	0	1	1	0	0	1	2	2	1	1	1	0	0	1	0	0	0	0	0	10	4	2	1	2	1	1	1	12	6	5
51162074001-10007	1	1	11	1	3	1	1	0	6	3	3	3	9	3	3	3	1	1	1	0	1	1	0	0	1	1	1	1	1	1	0	0	0	0	0	0	0	0	7	6	4	1	3	1	3	1	19	9	4
51162079001-22503	1	1	19	0	7	1	1	1	10	3	3	3	9	3	3	3	1	1	1	0	1	1	0	0	0	2	3	1	1	1	0	0	1	0	0	0	0	0	10	5	3	2	2	2	5	1	20	9	4
51162086001-22506	1	1	1	1	0	0	1	0	2	2	2	2	6	2	2	2	2	2	1	0	1	1	0	0	0	2	2	1	1	1	0	0	0	0	0	0	0	0	8	6	3	2	2	2	3	1	19	6	6
51162091001-10007	1	1	3	0	2	1	0	0	3	1	2	2	5	1	3	3	1	3	2	0	1	2	0	0	0	3	1	1	5	5	0	1	1	0	0	0	0	0	19	4	1	1	1	1	6	1	15	7	7
51162105001-10002	0	#NULL!	6	1	0	1	1	0	3	3	3	4	10	5	2	4	2	1	1	0	2	1	0	1	0	1	1	1	1	2	0	1	0	0	0	0	0	0	9	4	3	3	1	1	6	1	19	11	6
51170002000	0	1	9	1	3	1	0	0	5	3	3	2	8	3	5	1	4	1	1	0	1	1	0	0	0	4	2	1	1	1	0	1	0	0	0	1	0	0	12	6	5	4	3	3	2	2	25	9	7
51170003000	1	1	7	1	6	0	1	0	8	3	4	3	10	5	4	4	3	5	1	0	2	1	0	0	1	2	4	1	1	4	0	0	0	0	0	0	0	1	15	6	4	1	2	5	2	1	21	13	11
51170004000	1	1	7	0	0	1	1	0	2	3	3	2	8	2	4	2	1	1	1	0	1	2	0	0	0	1	2	1	1	1	0	0	0	0	0	0	0	1	9	6	5	1	5	1	6	1	25	8	4
51170005000	1	1	4	0	0	1	1	0	2	1	1	2	4	5	2	2	1	1	1	0	1	1	0	0	0	2	1	1	1	1	0	0	0	0	0	0	0	1	8	2	2	2	1	1	3	1	12	9	4
51170006010	0	1	11	1	1	1	1	1	5	2	3	3	8	4	2	3	1	1	1	0	1	1	0	0	0	2	2	1	1	2	0	1	1	0	0	0	0	1	12	2	4	2	1	2	4	1	16	9	4
51170007000	1	1	1	1	0	1	1	0	3	4	4	3	11	4	3	4	2	2	1	0	1	1	0	0	1	3	2	1	2	1	0	0	1	0	0	0	0	0	12	6	3	1	1	2	3	1	17	11	6
51170008000	1	1	8	1	0	1	0	0	2	2	2	2	6	4	1	3	3	5	1	0	3	2	0	0	0	2	2	1	1	1	0	1	0	0	0	0	0	1	11	4	3	1	1	2	3	1	15	8	12
51170011010	1	1	9	1	2	1	1	0	5	1	2	2	5	3	2	3	1	1	1	0	1	1	0	0	0	1	2	1	1	1	0	1	1	0	0	0	0	0	9	2	2	1	1	1	2	1	10	8	4
51170013000	1	0	1	0	0	0	0	0	0	3	3	3	9	3	3	2	2	3	1	0	1	1	0	0	1	4	3	1	1	1	0	0	0	0	0	0	0	0	12	4	2	3	4	4	4	2	23	8	7
51170014000	1	0	2	0	2	1	1	0	4	3	4	3	10	4	3	3	3	1	1	0	1	2	0	0	0	1	2	2	1	1	0	0	0	0	0	0	0	0	9	4	2	1	2	1	5	1	16	10	6
51170015000	1	0	12	0	5	1	1	0	7	1	3	3	7	2	3	4	2	1	1	0	1	1	0	1	1	4	1	1	1	1	0	1	0	0	0	1	0	0	13	5	2	1	3	4	4	1	20	9	5
51170016000	1	0	7	0	0	0	1	1	2	3	3	3	9	3	3	4	3	2	1	0	1	1	0	0	0	2	1	1	1	1	0	0	1	0	0	0	0	0	8	3	1	1	1	2	1	1	10	10	7
51170017000	0	0	5	1	2	0	0	0	3	3	3	3	9	3	2	3	3	2	1	0	1	1	0	0	0	1	2	1	1	1	0	1	0	0	0	0	0	0	8	5	2	1	1	1	1	2	13	8	7
51170018000	1	1	7	1	0	0	0	0	1	3	3	3	9	1	3	3	2	2	2	0	2	1	0	0	0	2	2	1	1	1	1	1	1	1	1	1	1	1	16	2	3	2	2	2	6	5	22	7	8
51170021000	0	1	11	1	7	1	1	1	11	2	3	3	8	4	2	1	4	2	1	0	1	3	0	0	0	2	3	1	1	3	0	1	1	0	0	0	0	0	15	6	4	5	4	3	6	1	29	7	8
51170022000	0	0	1	0	5	0	0	0	5	3	4	3	10	2	2	3	2	5	1	0	1	2	0	0	0	5	2	1	2	1	0	1	0	0	0	0	0	0	14	5	2	1	2	3	2	1	16	7	9
51170023000	1	0	20	1	0	0	0	0	1	3	3	3	9	3	2	3	3	5	3	1	2	3	0	1	0	5	5	1	2	1	0	1	0	0	0	0	0	1	20	5	3	2	2	3	4	2	21	8	14
51170025010	1	0	11	1	1	1	1	0	4	4	4	5	13	3	4	2	2	1	1	0	1	1	0	0	0	1	2	1	1	5	1	0	1	0	0	0	0	0	13	6	3	3	2	2	5	1	22	9	5
51170027000	1	1	4	0	2	1	1	0	4	2	3	2	7	3	3	1	2	3	1	0	1	1	0	0	1	2	2	2	1	1	0	0	1	0	0	0	0	1	12	5	2	2	2	2	2	1	16	7	7
51170028010	1	1	7	1	0	1	1	0	3	3	4	3	10	4	5	4	1	1	1	0	1	1	0	0	0	3	2	1	1	5	0	1	0	0	0	0	0	1	15	4	2	1	2	2	3	2	16	13	4
51170030010	0	0	19	0	0	0	0	0	0	2	3	3	8	3	3	1	1	1	1	0	1	1	0	0	0	4	2	1	1	1	0	0	0	0	0	0	0	0	10	5	3	1	1	1	5	1	17	7	4
51170031000	0	0	10	1	7	1	1	1	11	3	3	3	9	4	4	5	1	1	1	0	1	1	0	0	0	3	2	1	2	2	0	0	1	0	0	0	0	1	13	6	3	1	1	2	5	1	19	13	4
51170034010	1	0	6	1	1	1	1	0	4	3	3	2	8	4	1	1	2	1	1	0	1	1	0	0	0	5	1	2	2	1	0	0	1	0	0	0	0	0	13	4	1	1	1	3	3	1	14	6	5
51170035010	1	0	8	0	3	1	1	1	6	2	3	2	7	4	3	4	1	2	1	0	1	1	0	0	0	2	2	1	1	1	0	1	1	0	0	0	0	0	10	4	1	1	1	2	1	1	11	11	5
51170036000	0	0	16	1	6	1	1	0	9	4	5	3	12	4	3	3	4	3	1	0	2	2	0	0	0	5	2	1	1	1	0	1	1	0	0	0	0	1	15	6	3	1	6	5	4	2	27	10	10
51170037000	1	0	3	1	1	0	0	0	2	3	3	3	9	3	2	3	2	3	2	0	1	2	0	0	0	3	3	1	1	2	0	1	0	0	0	0	0	0	13	4	4	1	3	3	4	1	20	8	8
51170039010	1	0	5	1	7	1	1	1	11	1	3	3	7	3	3	3	2	1	1	0	1	1	0	0	0	2	2	1	1	1	0	0	0	0	0	0	0	1	9	4	2	4	3	3	4	1	21	9	5
51170040000	1	1	12	1	0	1	0	0	2	2	4	4	10	4	2	2	3	5	1	0	1	1	0	0	1	3	2	1	1	2	0	1	0	0	0	0	0	1	13	6	2	2	2	3	4	1	20	8	10
51170041000	0	0	6	1	3	1	1	1	7	3	3	3	9	3	3	3	3	4	3	1	3	3	1	1	1	3	3	4	3	3	0	1	0	0	0	0	0	0	23	2	3	5	5	2	1	5	23	9	14
51170042000	1	0	4	1	0	1	1	0	3	3	3	3	9	3	1	1	3	2	1	0	1	1	0	0	0	2	1	1	1	5	0	0	0	0	0	0	0	1	12	3	2	1	3	4	3	1	17	5	7
51170045000	0	0	3	1	1	1	0	0	3	3	4	3	10	4	1	1	1	1	1	0	1	1	0	0	0	1	1	1	1	1	0	0	0	0	0	0	0	0	6	6	3	1	1	3	1	1	16	6	4
51170046000	0	0	11	1	0	0	0	0	1	3	2	1	6	2	3	3	2	2	1	0	1	1	0	0	0	4	2	1	1	1	0	1	0	0	0	0	0	0	11	4	2	1	2	3	1	1	14	8	6
51170047011-22004	0	0	10	1	5	0	1	1	8	3	3	2	8	3	3	3	2	2	1	0	1	1	0	0	0	2	1	1	1	2	1	0	0	0	0	0	0	0	9	4	2	1	1	3	1	1	13	9	6
51170049000	1	0	4	0	1	0	1	0	2	2	3	3	8	3	1	4	1	3	1	0	1	1	0	0	0	2	3	1	1	1	0	1	0	0	0	0	0	1	11	2	2	1	1	3	3	1	13	8	6
51170051000	1	1	6	1	2	1	1	0	5	3	3	3	9	3	3	3	3	2	1	0	1	1	0	1	1	1	2	1	1	1	0	1	0	0	0	0	0	1	11	5	3	1	2	2	4	2	19	9	7
51170052000	0	1	1	1	2	1	1	0	5	1	1	1	3	1	1	1	1	3	1	0	1	1	1	0	1	3	3	1	1	1	0	0	0	0	0	0	0	0	12	2	2	1	2	2	4	2	15	3	6
51170053010	1	0	10	1	2	1	1	0	5	2	3	3	8	4	3	3	1	1	1	0	1	1	0	0	0	1	2	1	1	1	0	1	0	0	0	0	0	1	9	1	1	1	1	1	1	1	7	10	4
51170054000	1	0	6	1	0	1	1	0	3	3	3	2	8	3	1	1	2	2	1	0	1	1	0	0	0	1	2	1	1	1	0	1	0	0	0	0	0	0	8	6	3	1	1	3	1	1	16	5	6
51170056000	0	0	3	1	1	1	1	0	4	3	3	3	9	3	3	4	1	1	1	0	1	1	0	0	0	1	1	1	1	1	0	0	0	0	0	0	0	0	6	1	1	1	1	1	1	1	7	10	4
51170057010	0	0	6	1	5	1	1	0	8	3	3	3	9	1	3	1	1	1	1	0	1	1	0	0	0	1	1	1	1	1	0	0	0	0	0	0	0	0	6	1	1	1	1	1	1	1	7	5	4
51170059000	1	1	1	1	2	1	1	0	5	3	3	3	9	3	1	3	4	4	1	0	2	2	0	0	0	4	3	1	2	1	0	1	0	0	0	0	0	1	15	3	3	2	2	6	2	2	20	7	11
51170060000	1	0	6	1	2	1	1	0	5	4	4	4	12	3	2	2	1	4	1	1	1	1	0	0	0	3	3	1	1	1	0	0	0	0	0	0	0	0	10	2	2	1	3	6	2	1	17	7	8
51170061000	1	1	4	1	0	1	0	0	2	5	5	5	15	4	1	3	4	5	2	0	1	2	0	0	0	4	3	1	1	1	0	0	0	0	0	0	0	1	13	6	4	1	6	4	4	4	29	8	12
51170064000	1	0	10	1	5	1	1	1	9	2	3	2	7	3	1	3	2	5	1	0	1	1	0	0	0	2	2	1	1	2	0	0	0	0	0	0	0	1	10	6	2	3	5	3	3	1	23	7	9
51170067000	0	0	2	1	3	1	0	0	5	4	4	4	12	4	4	4	2	2	2	0	1	2	0	0	1	2	2	1	2	1	0	1	0	0	0	0	0	0	12	4	2	3	3	3	4	3	22	12	7
51170068010	1	0	8	1	0	0	0	0	1	3	3	3	9	3	3	3	3	3	3	0	1	1	0	0	0	3	3	1	1	1	0	0	0	0	0	0	0	0	10	1	1	1	1	4	1	1	10	9	10
51170069010	0	0	10	1	0	1	1	0	3	1	1	1	3	1	1	1	1	2	1	0	1	1	0	0	0	1	2	1	1	1	0	0	0	0	0	0	0	1	8	4	1	1	1	1	6	1	15	3	5
51170071000	0	0	6	1	3	1	1	0	6	2	2	2	6	4	3	2	1	1	1	0	1	1	0	0	0	2	2	1	1	1	0	0	0	0	0	0	0	1	9	5	2	2	1	2	5	1	18	9	4
51170072000	0	0	3	0	2	0	0	0	2	3	4	3	10	5	1	1	2	3	1	0	2	1	1	1	0	3	2	1	3	1	1	0	0	0	0	0	0	0	14	4	3	1	2	3	1	1	15	7	8
51170073000	0	0	2	0	0	1	0	0	1	3	3	4	10	3	3	4	1	1	1	0	1	1	0	0	0	1	2	1	1	1	0	0	0	0	0	0	0	0	7	5	3	1	1	2	1	2	15	10	4
51170075010	1	0	20	1	2	1	1	0	5	1	2	2	5	2	5	4	1	3	1	0	1	1	0	0	0	2	3	1	1	4	0	0	0	0	0	0	0	0	12	2	1	1	5	2	1	1	13	11	6
51170076000	1	0	4	1	6	1	1	0	9	4	4	3	11	4	3	3	4	2	1	0	2	1	0	1	0	4	4	1	3	3	0	1	0	0	0	0	0	0	18	6	3	1	4	5	1	1	21	10	9
51170078000	0	0	16	1	2	1	0	0	4	3	3	1	7	3	3	3	2	2	1	0	1	1	0	1	0	2	2	1	1	1	0	1	0	0	0	0	0	1	11	4	2	1	1	2	2	1	13	9	6
51170081000	0	0	6	0	3	0	1	1	5	2	4	3	9	3	4	4	1	2	1	0	1	1	0	0	0	5	1	1	1	1	0	0	0	0	0	0	0	0	10	4	3	3	1	3	3	4	21	11	5
51170084000	0	0	8	1	0	0	1	1	3	3	3	3	9	3	3	3	3	3	1	1	3	3	0	0	0	5	2	1	1	1	0	0	0	0	0	0	0	0	13	3	3	1	2	5	5	1	20	9	11
51170086005	0	0	8	0	0	0	0	0	0	1	1	1	3	1	1	1	1	1	1	0	1	1	0	0	0	1	2	1	1	1	0	0	1	0	0	0	0	0	8	6	3	1	6	1	5	1	23	3	4
51170089000	1	0	6	1	1	1	0	0	3	1	2	2	5	3	3	3	3	1	1	0	1	1	0	0	0	2	4	1	1	1	1	0	0	1	0	0	0	0	12	4	3	2	2	3	1	1	16	9	6
51170090000	0	0	7	0	2	1	0	0	3	3	3	3	9	3	4	4	3	3	3	1	1	1	0	0	1	3	2	1	1	1	0	1	1	0	0	0	0	0	12	2	2	1	1	2	2	1	11	11	11
51170093000	1	1	11	1	2	0	0	0	3	3	3	3	9	1	2	2	1	1	1	0	1	1	0	0	0	3	3	1	2	3	0	1	1	0	0	0	0	0	15	5	2	1	1	2	2	1	14	5	4
51170094000	0	1	2	0	6	1	1	0	8	3	4	2	9	5	3	5	1	5	1	0	5	1	0	0	0	1	1	1	5	5	0	1	1	0	0	0	0	0	16	6	3	1	2	2	1	1	16	13	12
51170095000	0	0	7	1	0	0	0	0	1	1	1	2	4	1	2	2	1	1	1	0	1	1	0	0	0	1	1	1	1	1	0	1	0	0	0	0	0	0	7	1	1	1	1	1	1	1	7	5	4
51170096000	0	1	5	1	7	1	1	0	10	2	1	3	6	3	2	1	3	1	1	0	1	1	0	0	0	3	2	1	1	2	0	0	1	0	0	0	0	0	11	6	5	4	2	5	4	2	28	6	6
51170098000	1	0	20	1	2	0	0	0	3	3	3	3	9	4	3	3	3	3	1	0	1	1	0	0	0	4	2	1	1	1	1	0	0	0	0	0	0	1	12	4	3	2	1	4	1	1	16	10	8
51170099010	0	0	5	0	4	0	0	0	4	3	3	3	9	5	1	3	1	1	1	0	1	1	0	0	0	2	2	1	1	1	0	0	0	0	0	0	0	0	8	3	2	1	1	1	4	1	13	9	4
51170100010	1	1	1	1	3	0	1	0	5	4	5	4	13	4	4	4	2	3	1	0	1	1	0	0	0	3	3	1	1	1	0	0	0	1	0	0	0	0	11	3	2	2	2	3	2	2	16	12	7
51170101110	1	1	5	0	0	0	0	0	0	3	3	3	9	3	2	2	2	2	1	0	1	1	0	0	0	3	2	1	1	1	0	1	1	0	0	0	0	0	11	4	2	1	3	4	3	1	18	7	6
51170104000	0	0	4	1	2	1	1	1	6	3	1	1	5	2	1	1	3	1	1	0	1	1	0	0	0	1	2	1	1	1	0	0	0	0	0	0	0	0	7	5	3	2	4	3	4	1	22	4	6
51170105000	1	0	11	0	0	1	1	1	3	2	2	2	6	3	3	2	2	1	1	0	1	1	0	0	0	2	1	1	1	1	0	0	0	0	0	0	0	0	7	3	2	1	3	3	2	2	16	8	5
51170106000	1	0	2	1	6	0	0	0	7	1	1	1	3	3	2	3	1	1	1	0	1	1	0	0	0	2	1	1	1	1	0	0	0	0	0	0	0	0	7	2	2	1	1	1	2	1	10	8	4
51170108000	0	0	3	1	7	1	1	0	10	2	2	2	6	4	2	1	1	3	1	0	1	1	0	0	1	1	2	1	2	5	0	0	0	0	0	0	0	0	13	6	2	4	2	2	2	2	20	7	6
51170109000	1	1	5	1	1	0	1	0	3	3	3	3	9	4	4	5	1	1	1	0	1	1	0	0	0	2	1	1	2	1	0	1	0	0	0	0	0	0	9	6	3	1	1	1	1	1	14	13	4
51170111010	1	0	3	0	0	0	0	0	0	3	3	3	9	3	2	2	3	4	2	0	1	2	0	0	0	5	2	1	1	1	0	1	1	0	0	0	0	0	14	2	2	1	1	3	3	1	13	7	10
51170113000	0	0	5	1	0	1	1	0	3	3	3	3	9	4	2	2	2	2	1	0	1	2	0	0	0	2	3	1	1	1	1	1	0	0	1	0	0	1	14	4	3	1	2	3	3	1	17	8	6
51170114000	1	0	12	0	2	1	1	1	5	3	3	3	9	3	1	3	3	3	3	1	3	3	0	0	1	2	2	1	2	3	0	0	1	0	0	0	0	0	15	5	2	2	2	2	5	2	20	7	13
51170115010	1	0	20	1	7	1	1	1	11	3	3	3	9	3	3	3	1	1	1	0	1	1	0	0	0	1	1	1	1	5	0	1	0	0	0	0	0	1	12	3	3	4	1	3	2	1	17	9	4
51170116000	0	0	20	0	2	1	0	1	4	2	2	3	7	2	2	3	2	3	2	0	1	2	0	0	0	3	3	1	1	1	0	1	0	0	0	0	0	1	13	4	1	2	2	2	2	2	15	7	8
51170001003-21406-22503-22705	1	1	6	0	0	0	0	0	0	3	3	3	9	3	3	3	3	3	3	1	1.70799	1	0	0	0	3	3	1	1	1	0	0	0	0	0	0	0	0	10	5	3	2	2	2	3	2	19	9	11.708
51170009002-21408-21409	1	0	7	1	3	1	0	0	5	3	3	3	9	2	3	3	3	3	1	0	1	1	0	0	0	1	2	1	1	1	0	1	1	0	0	0	0	1	10	1	2	3	1	1	1	1	10	8	8
51170010001-21606	0	0	7	1	1	1	0	0	3	3	3	3	9	1	2	1	1	1	1	0	1	1	0	0	0	1	1	1	1	1	0	1	0	0	0	0	0	0	7	1	1	1	1	1	1	1	7	4	4
51170012001-21606	0	0	7	1	2	1	0	0	4	3	3	3	9	1	1	1	1	1	1	0	1	1	0	0	0	1	1	1	1	1	0	1	0	0	0	0	0	0	7	1	1	1	1	1	1	1	7	3	4
51170019001-22703	0	1	12	1	0	1	1	1	4	3	4	4	11	3	2	3	2	1	1.10521	0	1	1	0	0	0	1	1	1	1	2	0	0	0	0	0	0	0	0	7	6	4	2	3	2	2	1	20	8	5.10521
51170020001-22503	1	0	20	0	0	0	0	0	0	1	1	1	3	3	1	2	2	3	1	0	1	1	0	0	0	3	1	1	1	2	0	0	0	0	0	0	0	1	10	2	2	2	1	3	3	1	14	6	7
51170024002-10009-21606	0	0	#NULL!	1	0	1	1	0	3	3	4	4	11	4	3	1	1	1	1	0	1	1	0	0	0	1	2	1	1	4	0	1	1	0	0	0	0	1	13	2	2	1	3	2	3	1	14	8	4
51170026011-21606	1	0	3	1	1	0	0	0	2	1	1	1	3	2	1	1	1	2	1	0	1	1	0	0	0	2	2	1	1	1	0	0	1	0	0	0	0	0	9	5	2	1	1	1	4	1	15	4	5
51170029011-10009	0	0	#NULL!	1	0	1	1	0	3	2	3	2	7	3	1	1	2	1	1	0	1	1	0	0	0	2	1	1	1	1	1	1	1	0	0	0	0	0	10	6	3	1	2	5	1	1	19	5	5
51170032012-10007-10008	0	0	4	1	3	1	1	1	7	2	2	1	5	4	1	3	1	1	1	0	1	1	0	0	0	1	2	1	1	1	0	0	0	0	0	0	0	0	7	3	1	1	1	1	1	1	9	8	4
51170033001-10002	1	#NULL!	11	1	2	1	0	0	4	1	1	3	5	2	2	2	3	3	3	1	1	2	0	0	0	2	2	1	1	1	0	0	0	0	0	0	0	0	9	2	3	2	3	3	1	2	16	6	11
51170038002-10009-22809	0	0	#NULL!	1	1	1	1	0	4	1	1	1	3	5	5	2	1	1	1	0	1	1	0	0	0	3	1	1	1	1.42245	0	1	0	0	0	0	0	1	10.4225	6	3	1	1	1	1	1	14	12	4
51170043011-20502	0	0	3	1	0	0	1	0	2	3	4	3	10	3	5	1	2	3	1	0	1	1	0	1	1	5	2	1	1	1	0	0	0	0	0	0	0	1	14	5	3	2	1	3	2	1	17	9	7
51170044001-22503	1	0	19	0	0	1	0	0	1	4	4	2	10	4	3	4	3	3	2	0	1	1	0	1	0	2	2	1	1	3	1	1	1	0	0	0	0	0	14	5	2	3	1	4	3	1	19	11	9
51170048001-22503	0	0	7	1	7	1	1	1	11	3	3	3	9	4	3	1	5	3	3	0	3	3	1	1	0	4	3	1	1	3	0	1	0	0	0	1	1	1	21	6	5	6	6	6	6	6	41	8	14
5117005002-21606-22503	0	0	7	0	0	1	0	0	1	1	1	1	3	1	3	1	1	1	1	0	1	1	0	0	0	1	1	1	1	1	0	0	0	0	0	0	0	0	6	6	3	1	1	2	1	1	15	5	4
51170055014-22002-22003-22003-22005	0	0	1	0	1	1	0	0	2	1	1	1	3	2	2	1	1	1	1	0	1	1	0	0	1	2	2	1	1	1	0	0	0	0	0	0	0	0	9	2	2	1	1	2	1	1	10	5	4
51170058101-22505	0	0	1	1	7	0	1	0	9	5	5	5	15	5	2	4	3	2	3	1	1	1	0	0	0	1	2	1	1	2	0	1	0	1	0	0	0	0	10	2	2	1	3	2	2	2	14	11	10
51170062001-22503	1	0	10	1	1	0	1	0	3	3	3	3	9	4	1	1	4	3	1	1	2	1	0	0	0	2	2	1	1	1	0	1	0	0	0	0	0	1	10	4	3	5	2	2	5	1	22	6	11
51170063001-10007	0	1	#NULL!	1	6	1	1	0	9	3	3	3	9	4	3	3	2	1	1	0	1	2	0	0	0	2	2	1	2	1	1	1	0	0	0	0	0	0	12	6	3	2	4	3	4	3	25	10	5
51170065003-22302-22306-22704	1	0	4	1	5	1	1	0	8	3	3	3	9	4	3	2	4	3	3	0.472792	4	4	0	0	0	2	3	1	3	2	0	1	1	0	0	0	0	1	18	4	4	4	3.75036	4	3	4	26.7504	9	14.4728
51170066001-22503	1	0	3	1	2	0	0	0	3	3	3	2	8	3	1	3	2	3	1	0	1	2	0	0	0	3	2	1	1	3	0	0	1	0	0	0	0	0	13	3	3	2	2	3	2	1	16	7	7
5117007002-21406-22503	0	0	5	1	3	1	0	0	5	2	3	2	7	5	5	2	1	1	1	0	3	1	0	0	1	2	1	1	1	1	0	1	0	0	0	0	0	1	10	3	2	1	2	2	3	1	14	12	6
51170074001-22503	1	0	20	0	2	1	1	1	5	3	3	2	8	4	2	3	3	5	1	1	1	2	1	0	1	3	3	1	1	1	1	1	0	1	0	0	0	1	17	3	3	3	2	3	3	4	21	9	11
51170077011-21606	0	0	5	1	0	0	0	0	1	4	4	3	11	4	1	1	2	1	1	0	1	1	0	1	0	3	1	1	1	1	0	0	0	0	0	0	0	0	9	4	2	3	1	2	2	1	15	6	5
51170079001-21606	1	0	9	1	0	1	1	0	3	1	1	1	3	1	1	1	1	1	1	0	1	1	0	0	0	3	2	1	1	1	1	1	0	0	0	0	0	1	12	1	1	1	1	2	1	1	8	3	4
51170080011-21606	0	1	3	1	7	1	1	0	10	3	3	3	9	5	3	1	1	1	1	0	1	2	0	0	0	2	1	1	1	1	0	1	0	0	0	0	0	1	10	6	4	2	3	1	1	1	18	9	4
51170082001-21606	0	0	5	1	6	1	0	0	8	3	4	3	10	3	2	2	3	2	3	0	2	3	0	1	0	3	2	1	2	1	1	1	0	0	0	0	0	1	16	6	2	2	2	2	6	2	22	7	10
51170083001-22503	0	0	8	1	7	1	1	1	11	4	5	4	13	4	3	3	3	1	1	1	4	1	0	0	0	1	2	1	1	2	1	1	0	0	0	0	0	1	11	6	4	5	1	2	1	5	24	10	10
51170085001-22503	0	0	4	1	6	1	1	0	9	5	4	5	14	3	5	4	3	4	3	0	4	3	0	0	0	3	4	1	4	4	1	1	1	0	0	0	0	0	22	6	4	6	6	5	5	5	37	12	14
51170087001-22503	1	1	15	0	4	1	1	0	6	4	4	3	11	3	2	3	2	2	1	0	1	2	0	0	0	2	2	1	2	1	0	1	1	0	0	0	0	0	12	2	3	2	3	2	4	2	18	8	6
51170088001-21606	1	0	5	1	2	0	1	0	4	5	5	5	15	5	5	5	3	1	1	0	1	2	0	0	0	5	1	1	1	1	0	0	0	1	0	0	0	0	12	5	3	5	5	5	6	2	31	15	6
51170091011-21606	0	0	5	0	0	1	0	0	1	3	2	1	6	5	2	1	1	1	1	0	2	1	0	0	0	1	1	1	1	1	0	0	0	0	0	0	0	0	6	5	4	1	1	1	4	1	17	8	5
51170092102-21606-22503	0	0	2	1	4	1	1	0	7	3	3	3	9	1	1	1	1	2	1	0	5	1	0	0	0	2	2	1	5	1	0	1	0	0	0	0	0	0	13	6	3	1	1	2	6	1	20	3	9
51170097001-22503	0	0	5	1	2	1	1	0	5	2	1	2	5	2	2	2	2	1	2	0	2	2	1	1	1	2	2	2	2	3	1	0	1	0	0	0	0	0	18	3	3	2	2	2	2	3	17	6	7
51170102001-21301	0	0	3	1	6	1	1	1	10	3	3	3	9	2	3	2	3	1	2	0	1	1	0	0	0	1	1	1	1	2	0	0	0	0	0	0	0	0	7	6	5	1	6	1	3.40089	1	23.4009	7	7
51170103001-10007	1	1	16	1	0	1	1	0	3	1	1	1	3	2	2	3	3	2	1	0	1	1	0	0	0	1	2	1	1	1	0	0	0	0	0	0	0	1	8	4	3	1	3	1	5	1	18	7	7
51170107001-10007	1	0	7	0	0	0	0	0	0	3	3	2	8	3	1	2	3	4	1	0	1	1	0	0	0	4	2	1	1	3	0	0	0	0	0	0	0	0	12	6	4	1	4	4	3	1	23	6	9
51170110001-22503	1	1	8	1	0	0	1	0	2	2	2	2	6	1	3	3	3	5	1	0	1	1	0	0	0	4	2	1	1	1	0	0	1	0	0	0	0	1	12	5	3	1	2	5	1	1	18	7	10
51170112017-21403-41404-21405-21406-21407-21408-21409	1	0	3	1	3	1	0	0	5	3	4	4	11	4	3	3	3	3	1	0	1	1	0	0	0	2	3	1	1	1	0	1	1	1	0	0	0	1	13	3	2	1	1	2	2	1	12	10	8
51182001010	1	0	5	1	2	1	1	0	5	3	3	3	9	4	3	4	1	1	1	0	1	1	0	1	0	5	3	1	1	1	0	1	1	0	0	0	0	0	15	6	3	2	1	3	3	1	19	11	4
51182002000	0	0	10	1	7	1	1	0	10	2	3	2	7	3	3	3	1	2	1	0	1	1	0	0	0	2	1	1	1	1	0	0	0	0	0	0	0	0	7	5	2	1	2	2	5	1	18	9	5
51182003000	1	0	14	0	0	1	0	0	1	1	2	1	4	3	3	1	1	1	1	0	1	1	0	0	0	1	1	1	1	1	0	0	0	0	0	0	0	0	6	2	1	1	1	1	1	1	8	7	4
51182004000	1	0	6	1	0	1	0	0	2	2	2	2	6	4	1	1	2	1	1	0	1	1	0	0	0	3	2	2	1	1	0	0	0	0	0	0	0	1	11	5	2	1	3	2	1	2	16	6	5
51182005010	0	0	1	1	1	0	1	0	3	4	3	3	10	2	2	3	2	1	2	0	1	2	0	0	0	2	2	1	1	1	0	1	0	0	0	0	0	0	10	1	1	1	2	2	2	2	11	7	6
51182007010	1	1	4	1	2	1	1	1	6	4	4	4	12	5	1	4	1	2	1	0	1	1	0	0	1	5	5	1	1	1	0	0	1	0	0	0	0	0	16	3	2	1	2	4	2	1	15	10	5
51182008000	0	0	3	1	7	1	1	0	10	3	4	3	10	5	3	3	2	1	1	0	2	1	0	0	0	1	3	1	1	3	0	1	0	0	0	0	0	0	11	5	3	1	2	1	2	1	15	11	6
51182011000	1	1	6	1	4	1	1	1	8	3	3	3	9	4	3	3	2	1	1	0	1	1	0	0	0	3	1	1	1	1	0	1	1	0	0	0	0	1	11	3	3	1	3	3	2	1	16	10	5
51182012010	0	0	5	0	5	1	1	0	7	3	4	5	12	4	1	1	1	3	2	0	1	2	0	0	0	2	2	1	3	1	0	1	0	0	0	0	1	1	14	5	2	5	6	6	4	5	33	6	7
51182012010	0	0	5	0	5	1	1	0	7	3	4	5	12	4	1	1	1	3	2	0	1	2	0	0	0	2	2	1	3	1	0	1	0	0	0	0	1	1	14	5	2	5	6	6	4	5	33	6	7
51182014000	1	1	11	1	3	1	1	0	6	3	4	3	10	4	2	2	2	1	2	0	1	1	0	0	0	5	1	1	1	1	1	1	0	0	0	0	0	0	12	5	3	1	1	4	2	1	17	8	6
51182016000	0	1	6	1	7	1	1	1	11	3	4	2	9	1	1	3	3	1	1	0	5	1	0	0	1	4	2	1	1	1	1	1	1	0	0	0	0	1	15	4	3	2	3	3	6	2	23	5	10
51182017000	0	1	4	1	7	1	1	1	11	3	3	3	9	4	4	4	1	1	1	0	1	1	0	0	1	5	3	1	1	1	0	0	0	0	0	0	0	0	13	6	5	1	2	2	6	2	24	12	4
51182018000	1	0	14	1	3	1	1	1	7	3	3	3	9	3	2	2	2	4	1	1	1	1	0	0	0	5	2	1	1	1	0	0	1	0	0	0	0	0	12	2	2	2	2	4	2	2	16	7	9
51182019010	1	1	3	0	1	1	0	0	2	1	1	1	3	3	2	2	1	1	1	0	1	1	0	0	0	4	2	1	1	2	0	0	0	0	0	0	0	1	12	2	2	1	1	2	1	1	10	7	4
51182020000	0	1	2	1	2	0	0	0	3	3	3	3	9	3	3	3	3	3	3	1	3	2	1	1	1	3	3	2	2	2	0	0	0	0	0	0	0	0	17	2	3	5	5	5	3	5	28	9	13
51182021000	1	1	8	0	6	1	1	0	8	3	3	3	9	4	1	3	2	3	2	0	1	1	0	0	1	5	1	1	1	1	1	0	0	0	0	0	0	0	12	6	3	5	6	5	2	4	31	8	8
51182022110	1	1	2	0	2	1	1	1	5	3	3	3	9	1	1	1	1	2	1	0	1	1	0	0	0	3	1	1	1	1	0	1	0	0	0	0	0	0	9	4	2	3	1	3	2	1	16	3	5
51182023010	1	1	13	1	5	1	1	0	8	2	3	3	8	4	4	3	1	3	1	0	1	1	0	0	0	3	3	1	1	1	0	1	1	0	0	0	0	0	12	4	3	1	3	2	3	1	17	11	6
51182024010	1	1	10	1	4	1	1	0	7	5	5	5	15	5	3	3	2	3	1	0	1	1	0	0	0	3	3	1	1	5	1	0	0	0	0	0	0	0	15	4	2	1	1	2	1	1	12	11	7
51182025000	0	0	3	1	4	1	1	1	8	5	5	5	15	3	3	4	2	2	2	0	1	2	0	1	1	2	1	1	1	3	0	0	0	0	0	0	0	1	13	4	3	1	4	3	1	1	17	10	7
51182027000	0	1	5	1	6	1	1	0	9	2	2	1	5	2	2	3	1	3	1	0	1	1	0	0	0	3	2	1	1	1	0	0	0	0	0	0	0	1	10	3	1	1	1	2	2	1	11	7	6
51182029000	1	1	16	1	4	1	0	0	6	3	3	2	8	3	4	4	2	1	1	0	1	2	1	0	1	1	1	1	1	2	0	0	1	0	0	0	0	0	11	5	3	2	3	2	4	2	21	11	5
51182030000	1	1	8	1	5	1	1	1	9	2	2	2	6	1	4	4	2	4	1	0	1	1	0	0	0	5	3	1	1	1	0	0	1	0	0	0	0	0	13	5	2	2	3	3	2	1	18	9	8
51182031000	1	0	15	0	0	1	1	1	3	3	3	3	9	3	2	2	1	2	1	0	1	1	0	0	0	2	2	1	1	1	0	0	0	0	0	0	0	0	8	4	3	4	4	4	2	1	22	7	5
51182032000	1	0	20	0	0	0	0	0	0	2	2	2	6	3	2	1	1	1	1	0	1	2	0	0	0	1	2	1	1	1	0	0	1	0	0	0	0	1	10	3	1	1	1	3	3	1	13	6	4
51182033000	0	1	1	1	7	1	1	1	11	5	5	4	14	3	4	4	4	2	3	0	1	2	0	0	0	2	2	2	3	2	0	0	0	0	0	0	0	0	13	3	3	3	5	3	2	5	24	11	10
51182034000	1	1	2	1	4	1	1	1	8	3	2	4	9	3	3	3	2	1	1	0	1	2	0	0	0	5	2	1	1	1	1	1	0	0	0	0	0	1	15	3	2	1	1	4	3	1	15	9	5
51182036000	1	0	2	1	0	1	1	1	4	2	2	2	6	1	4	3	3	4	1	0	2	2	0	0	1	4	2	1	1	3	0	1	1	0	0	0	0	1	17	4	2	1	5	5	1	2	20	8	10
51182037000	1	1	3	1	2	1	1	0	5	3	3	3	9	3	3	3	3	2	1	0	1	3	0	0	0	2	1	1	1	2	0	0	0	0	0	0	0	0	10	2	3	2	2	2	4	2	17	9	7
51182038000	1	1	3	1	4	1	0	0	6	3	3	2	8	4	2	4	2	5	2	1	1	2	0	0	1	5	2	1	1	1	0	0	0	0	0	0	0	0	13	1	3	1	2	3	6	1	17	10	11
51182039000	0	1	9	1	0	1	1	0	3	5	3	5	13	5	2	1	1	1	1	0	1	1	0	0	0	2	1	1	1	1	0	1	0	0	0	0	0	1	9	4	2	2	2	1	1	1	13	8	4
51182041000	0	0	6	0	7	1	1	0	9	2	2	1	5	2	2	2	1	1	1	0	1	1	0	0	0	1	1	1	1	1	0	0	0	0	0	0	0	0	6	3	3	1	2	1	5	2	17	6	4
51182042100	0	1	15	1	2	0	1	1	5	2	2	2	6	5	3	5	2	5	1	0	1	1	0	0	1	1	1	1	1	1	0	0	0	0	0	0	0	1	8	6	5	6	6	6	6	6	41	13	9
51182044000	0	1	19	1	5	1	1	0	8	3	3	3	9	4	2	4	3	2	1	0	2	1	0	1	0	5	1	1	1	1	0	0	0	0	0	0	0	0	11	5	2	5	2	2	2	1	19	10	8
51182046000	1	1	5	0	3	1	1	0	5	3	3	3	9	4	4	2	2	1	1	0	1	1	0	0	0	1	2	1	1	1	0	0	0	0	0	0	0	0	7	5	4	1	2	1	2	2	17	10	5
51182047000	1	0	4	1	7	1	1	0	10	3	3	2	8	3	3	3	2	5	2	0	2	1	0	0	0	2	2	1	1	1	0	1	0	0	0	0	0	1	10	6	4	1	2	2	3	1	19	9	11
51182049000	0	0	6	1	3	1	0	0	5	4	4	4	12	3	1	3	2	3	1	0	1	1	0	0	0	3	2	1	1	1	0	1	1	0	0	0	0	0	11	4	2	1	2	4	2	1	16	7	7
51182050000	1	1	11	0	2	1	1	0	4	3	3	4	10	5	2	3	2	2	1	0	2	1	0	1	0	2	2	1	1	2	1	1	1	0	0	0	0	1	14	2	2	1	2	3	3	1	14	10	7
51182051010	1	1	8	0	0	0	1	0	1	2	2	2	6	3	1	1	1	2	1	0	1	1	0	0	0	3	2	1	3	3	0	1	0	0	0	0	0	1	15	3	3	1	1	3	5	1	17	5	5
51182052000	1	0	11	1	3	1	1	1	7	3	2	2	7	3	4	1	3	4	1	0	1	1	0	0	0	4	1	1	1	1	0	0	0	0	0	0	0	0	9	6	3	1	1	6	3	1	21	8	9
51182053000	1	0	3	0	7	1	1	1	10	3	3	4	10	4	3	3	2	1	1	0	2	2	0	1	0	5	3	1	1	1	1	1	0	0	0	0	1	1	18	5	2	1	3	5	2	1	19	10	6
51182054010	1	1	8	0	0	0	0	0	0	5	5	4	14	5	3	4	2	5	1	0	1	2	0	0	0	5	3	1	1	1	0	1	1	0	0	0	0	0	15	3	2	3	1	3	3	1	16	12	9
51182055010	0	0	2	1	6	1	0	0	8	4	4	4	12	4	2	3	2	1	1	0	1	2	0	0	1	1	1	2	1	1	0	1	0	0	0	0	0	0	10	6	2	1	4	1	1	1	16	9	5
51182056000	1	1	1	1	0	1	1	0	3	2	3	3	8	3	4	3	1	5	1	0	1	1	0	0	0	3	3	1	1	1	0	1	0	0	0	0	0	0	11	5	3	1	2	5	2	1	19	10	8
51182058010	1	0	7	1	7	1	1	1	11	3	3	3	9	3	3	3	2	1	1	0	1	1	0	0	0	3	2	1	1	1	0	0	0	0	0	0	0	1	10	3	1	4	1	4	4	1	18	9	5
51182059010	1	0	9	1	0	1	1	0	3	2	3	3	8	4	2	3	1	2	1	0	1	1	0	0	0	2	2	1	1	1	0	0	1	0	0	0	0	0	9	5	2	4	1	3	1	1	17	9	5
51182060010	0	0	4	1	7	1	1	0	10	3	3	3	9	3	3	5	2	4	1	0	1	1	1	1	0	5	5	1	1	1	0	1	0	0	0	0	0	1	18	4	2	2	3	4	2	1	18	11	8
51182061010	0	0	9	1	5	1	1	0	8	3	3	2	8	4	2	2	1	5	1	0	1	1	0	0	0	1	1	1	1	1	0	0	0	0	0	0	0	0	6	5	3	1	2	4	5	4	24	8	8
51182062010	0	0	2	1	5	1	1	1	9	1	1	1	3	1	3	1	1	5	1	0	1	1	0	0	0	1	2	1	1	1	0	0	0	0	0	0	0	0	7	1	1	1	1	1	1	1	7	5	8
51182063010	0	0	11	1	4	0	1	0	6	4	3	3	10	3	3	1	3	2	1	0	1	3	0	0	0	3	2	1	1	1	0	0	0	0	0	0	0	1	12	5	2	2	3	2	4	2	20	7	7
51182065010	0	0	3	1	4	1	1	0	7	4	4	4	12	4	3	4	3	3	1	0	1	1	0	0	0	1	1	1	1	1	0	0	0	0	0	0	0	0	6	4	2	1	2	1	2	1	13	11	8
51182066010	1	1	20	0	1	1	0	0	2	2	3	4	9	5	3	4	2	1	1	0	1	1	0	0	0	1	1	1	1	1	0	1	1	0	0	0	0	0	8	5	2	1	6	1	3	1	19	12	5
51182068000	1	0	2	1	3	1	1	0	6	2	2	3	7	4	4	4	2	1	1	1	1	2	0	0	0	2	2	1	1	1	0	0	0	0	0	0	0	0	9	2	2	3	2	2	2	2	15	12	6
51182069000	1	0	8	1	5	1	1	0	8	4	4	3	11	5	3	2	2	3	1	0	1	1	0	1	0	2	2	1	1	1	0	1	1	0	0	0	0	1	12	4	2	1	3	3	2	2	17	10	7
51182071010	0	0	4	1	7	1	1	1	11	4	4	5	13	5	3	4	2	2	1	0	2	1	0	0	0	3	2	1	1	1	1	1	1	0	0	0	0	0	12	5	5	2	4	4	5	2	27	12	7
51182072000	1	0	15	0	2	1	1	1	5	3	3	3	9	3	1	2	1	2	1	1	1	1	0	0	0	3	2	1	1	1	0	1	1	0	0	0	1	1	13	3	2	2	2	3	3	1	16	6	6
51182073000	1	0	8	1	4	1	1	1	8	4	4	4	12	4	3	2	3	5	3	0	1	2	1	1	0	3	4	1	1	1	0	1	1	1	0	0	0	0	17	4	4	3	4	3	6	1	25	9	12
51182074010	0	1	4	1	7	0	1	0	9	2	3	2	7	5	4	4	1	1	1	0	1	1	0	0	0	1	2	1	1	1	0	0	0	0	0	0	0	0	7	6	2	1	1	1	1	1	13	13	4
51182076000	1	1	6	1	1	0	0	0	2	1	1	1	3	3	3	3	2	2	1	0	1	1	0	0	0	2	3	1	2	1	0	0	0	0	0	0	0	0	10	4	3	1	4	2	3	1	18	9	6
51182077000	1	0	2	0	1	1	1	0	3	3	3	4	10	4	4	4	2	5	3	0	3	2	0	1	1	2	2	1	2	1	0	1	1	0	0	0	0	0	14	2	2	1	2	1	2	1	11	12	13
51182078100	1	1	1	1	4	1	1	1	8	3	3	3	9	1	1	1	1	1	1	0	1	1	0	0	0	3	2	1	1	1	0	0	0	0	0	0	0	0	9	3	2	2	2	2	4	2	17	3	4
51182081010	1	1	15	0	0	1	1	0	2	3	3	3	9	3	3	3	2	1	1	0	1	1	0	0	1	1	2	1	1	1	0	1	0	0	0	0	0	0	9	3	2	2	1	1	2	1	12	9	5
51182082000	0	0	20	1	5	0	1	0	7	3	3	3	9	4	3	1	1	1	1	0	1	1	0	0	1	1	1	1	1	1	0	1	1	0	0	0	0	1	10	6	2	1	2	1	1	1	14	8	4
51182084010	0	1	5	1	0	1	0	0	2	3	3	3	9	3	3	1	2	3	1	0	1	1	0	1	0	2	2	1	2	1	0	1	1	0	0	0	0	1	13	4	2	1	2	3	3	1	16	7	7
51182086000	1	0	6	1	1	1	0	0	3	2	2	2	6	3	3	1	2	1	1	0	1	1	0	0	0	1	1	1	1	1	0	0	0	0	0	0	0	0	6	2	2	2	2	2	2	2	14	7	5
51182087000	1	0	3	1	3	1	0	0	5	1	1	2	4	4	1	2	1	1	1	0	1	2	0	0	0	2	2	1	1	3	0	0	0	0	0	0	0	1	12	4	2	1	1	2	1	1	12	7	4
51182088000	1	0	6	1	3	1	1	0	6	3	3	3	9	3	3	3	2	1	1	0	1	2	0	0	1	2	1	1	1	1	0	1	1	0	0	0	0	0	11	2	2	2	2	2	2	1	13	9	5
51182090000	0	0	6	0	1	1	1	0	3	2	2	2	6	2	3	3	1	2	1	0	1	1	0	1	0	4	2	1	1	1	0	0	0	0	0	0	0	0	11	2	3	2	1	2	3	1	14	8	5
51182091000	0	0	10	1	6	1	1	0	9	4	5	4	13	4	3	3	2	3	1	0	1	1	0	1	0	3	3	1	1	2	0	1	0	0	0	0	0	1	14	6	3	3	2	3	3	2	22	10	7
51182092010	0	0	2	1	0	1	1	1	4	2	2	2	6	3	3	1	2	1	1	0	1	1	0	0	0	2	1	1	1	1	0	0	0	0	0	0	0	1	8	2	2	1	1	2	2	1	11	7	5
51182094010	1	0	4	1	2	1	1	0	5	1	1	1	3	3	2	1	1	3	1	0	1	1	0	0	0	4	2	1	1	1	0	1	0	0	0	0	0	0	11	6	2	4	2	3	6	1	24	6	6
51182095000	1	0	2	1	1	1	1	0	4	2	3	3	8	3	2	4	4	1	1	0	1	2	0	0	0	2	4	1	1	3	0	1	0	0	0	0	0	1	15	4	3	1	2	4	2	1	17	9	7
51182096000	0	0	10	1	1	1	1	0	4	3	3	3	9	5	4	3	1	1	1	0	1	1	0	0	0	1	1	1	1	1	0	1	1	0	0	1	0	1	10	6	2	1	1	1	1	1	13	12	4
51182098010	1	1	13	1	1	0	0	0	2	3	4	3	10	4	1	1	1	1	1	0	1	1	0	0	0	2	1	1	1	1	0	0	0	0	0	0	0	0	7	4	2	1	1	2	2	1	13	6	4
51182006001-22503	1	0	5	1	1	0	1	0	3	2	2	2	6	4	3	4	2	1	1	0	1	2	0	0	0	4	1	1	1	1	1	1	1	0	0	0	0	1	14	5	1	1	1	4	2	1	15	11	5
51182009111-21606	0	0	1	1	2	1	0	0	4	1	1	2	4	3	4	1	2	3	1	0	1	1	0	0	0	1	3	1	1	1	0	0	0	0	0	0	0	0	8	4	2	1	1	3	1	1	13	8	7
51182010001-22503	1	0	1	1	7	1	1	0	10	4	4	3	11	3	3	3	2	3	1	0	1	2	0	0	0	2	2	1	1	1	0	1	1	0	0	0	0	0	11	6	3	1	2	2	2	1	17	9	7
51182013101-10007	0	0	5	0	0	0	0	0	0	5	5	4	14	3	3	3	1	1	1	0	1	1	0	0	0	2	1	1	1	1	0	0	1	0	0	0	0	0	8	5	2	1	1	1	5	1	16	9	4
51182015011-21606	0	0	10	0	3	1	1	0	5	4	5	3	12	5	3	4	1	3	2	0	1	1	0	0	0	2	1	1	1	1	0	0	1	0	0	0	0	0	8	4	3	2	2	3	6	1	21	12	7
51182026111-21606	1	0	1	0	1	1	1	1	4	1	3	3	7	3	1	3	1	5	1	1	1	1	0	0	0	5	1	1	1	1	0	0	0	0	0	0	0	0	10	1	1	1	1	1	1	1	7	7	9
51182028001-22805	1	1	10	1	2	1	1	0	5	3	2	2	7	3	3	3	1	1	1	0	1	3	0	0	0	2.09169	1	1	1	1	0	0	0	0	0	0	0	0	9.09169	6	3	1	2	2	2	1	17	9	4
51182035001-10009	0	0	#NULL!	1	0	1	0	0	2	4	4	4	12	3	3	2	3	1	2	0	1	1	0	0	0	4	3	1	1	2	0	0	0	0	0	0	0	1	13	5	3	2	3	4	4	1	22	8	7
51182040001-10009	1	1	#NULL!	1	4	1	1	0	7	3	4	4	11	1	4	3	1	1	1	0	1	1	0	0	0	1	1	1	1	1	0	1	0	0	0	0	0	1	8	3	2	1	2	2	1	1	12	8	4
51182043001-22503	0	0	4	1	2	1	0	0	4	3	3	3	9	4	2	4	4	4	1	0	3	1	0	0	0	4	3	1	2	2	0	0	0	0	0	0	0	0	13	5	3	3	5	5	2	1	24	10	12
51182045001-21406	0	0	18	1	2	1	1	0	5	3	3	2	8	4	3	3	3	3	1	1	4	3	0	0	0	1	3	1	1	3	0	1	0	1	0	0	0	0	14	2	2	3	5	2	4	1	19	10	12
51182048001-21502	0	1	16	1	7	1	1	1	11	2	3	3	8	4	3	3	2	4	1	1	2	2	0	1	0	4	2	1	1	1	1	1	1	0	0	0	1	1	17	3	2	3	4	2	5	2	21	10	10
51182057012-21606-22503	0	0	2	0	0	0	0	0	0	3	3	3	9	1	1	2	1	1	1	0	1	1	0	0	0	2	2	1	1	2	0	1	0	0	0	0	0	0	10	1	1	1	1	4	1	1	10	4	4
51182064011-22503	0	0	4	1	0	1	1	0	3	5	5	5	15	4	1	2	1	5	1	0	1	1	0	1	0	3	2	1	1	3	0	1	0	0	0	0	0	1	14	5	3	1	1	3	1	1	15	7	8
51182067001-22503	1	1	2	1	6	1	1	0	9	4	4	4	12	3	4	4	2	3	1	0	1	1	1	0	0	1	1	1	1	1	0	0	0	0	0	0	0	0	7	6	4	2	1	4	1	4	22	11	7
51182070006-22503-22701-22702-22703-22704-22705	0	0	8	1	1	1	1	0	4	3	3	4	10	4	2	3	1.6068	1.61965	0.865126	-0.0469188	1.61803	1	0	0	0	1	3	1	4	1	1	1	0	0	0	0	0	1	14	5	3	1	1	3	6	1	20	9	5.66269
51182075001-10007	0	1	7	1	7	1	1	0	10	1	1	2	4	3	1	2	1	1	1	0	2	1	0	1	1	1	1	1	1	1	0	0	0	0	0	0	0	0	8	4	3	1	1	1	3	1	14	6	5
51182079011-10007	0	0	4	1	6	1	1	0	9	3	3	3	9	3	1	1	1	1	1	0	1	1	0	0	0	2	2	1	1	1	1	1	1	0	0	0	0	0	11	4	2	1	2	2	2	1	14	5	4
51182080001-22804	1	0	8	0	2	1	1	0	4	3	3	2	8	5	2	1	2	2	2	0	2	1	0	0	0.136962	2	2	2	2	2	0	0	1	0	0	0	0	0	12.137	2	3	5	2	5	1	2	20	8	8
51182083002-10007-21301	0	0	3	0	0	0	1	1	2	1	2	3	6	2	3	2	2	3	2	1	3	2	1	1	1	2	2	2	2	2	0	0	0	1	0	0	0	1	17	3	2	2	2	2	2.99525	3	16.9952	7	11
51182085002-10007-22701	1	1	3	0	3	0	1	0	4	2	2	2	6	2	1	3	1.55533	3	1	0	1	1	0	0	1	2	2	1	1	1	0	0	0	0	0	0	0	1	10	5	3	1	2	2	2	1	16	6	6.55533
51182089001-10009	0	0	#NULL!	1	7	1	1	1	11	4	4	4	12	4	3	3	3	1	1	0	1	1	0	0	0	2	2	1	1	2	0	0	0	0	0	0	0	1	10	6	4	1	4	2	6	4	27	10	6
51182093004-22208-22307-22402-22802	1	0	3	1	1	0	1	0	3	1	2	2	5	4	2	3	3	3	2	0	2	1	0.0685429	0	0	2	2	1	1	1	0	0	0	0	0	0	0	0	8.06854	3	2	3	3	2	3	2.01764	18.0176	9	10
51182097011-22503	0	0	7	1	1	0	0	0	2	2	2	2	6	1	1	1	2	1	1	0	1	1	0	0	0	2	2	1	1	1	0	1	0	0	0	0	1	1	11	5	1	1	1	2	4	1	15	3	5
51370001000	0	0	13	1	4	1	1	0	7	3	2	4	9	4	5	5	1	5	1	0	1	1	0	1	1	2	2	1	1	1	0	1	1	0	0	0	0	0	12	6	4	1	1	1	6	1	20	14	8
51370002000	1	0	7	1	4	1	1	0	7	2	3	2	7	3	2	3	3	3	2	0	1	2	0	0	1	1	1	1	1	1	0	0	0	0	0	0	0	0	8	4	3	3	2	4	3	2	21	8	9
51370003010	1	0	5	0	0	0	0	0	0	2	3	2	7	3	3	4	1	1	1	0	1	2	0	0	0	1	2	1	1	3	1	0	1	0	0	0	1	1	14	4	3	4	4	4	2	1	22	10	4
51370005000	1	1	10	0	0	0	0	0	0	3	3	3	9	4	3	4	3	1	2	0	3	2	0	0	0	5	4	1	1	1	0	0	0	0	0	0	0	1	15	5	3	3	1	3	3	1	19	11	9
51370007010	1	1	7	0	1	0	1	0	2	3	3	3	9	3	3	3	2	3	2	0	1	2	0	0	0	3	2	1	1	1	0	0	0	0	0	0	0	0	10	3	2	2	2	2	2	2	15	9	8
51370009010	1	1	6	0	0	0	0	0	0	3	3	3	9	2	3	4	1	3	1	0	1	1	0	0	0	1	1	1	1	1	0	1	1	1	0	0	1	1	11	5	2	1	1	2	2	1	14	9	6
51370011000	0	1	12	1	0	1	0	0	2	2	3	3	8	1	2	2	2	3	2	0	2	2	0	0	0	3	2	1	2	2	0	0	0	0	0	0	0	0	12	5	4	1	1	2	1	1	15	5	9
51370012010	0	1	2	0	0	0	0	0	0	3	3	3	9	3	4	4	1	1	1	0	1	1	1	1	1	3	3	1	1	1	0	0	0	0	0	0	0	0	13	5	4	1	3	1	4	1	19	11	4
51370013110	1	1	1	0	0	0	0	0	0	1	2	2	5	3	3	3	2	2	2	0	2	2	0	0	1	4	4	1	2	2	1	1	1	0	0	0	0	1	20	4	2	1	2	1	1	1	12	9	8
51370014110	0	1	3	1	7	1	1	0	10	5	5	4	14	3	2	2	2	3	1	0	1	1	0	0	1	4	2	2	1	1	0	1	0	0	0	0	0	0	13	6	3	5	2	2	1	1	20	7	7
51370015000	1	1	20	0	1	1	1	0	3	3	3	3	9	4	4	4	3	5	1	1	4	1	0	0	0	4	3	1	3	3	0	1	0	0	0	0	0	1	17	3	3	3	3	5	2	3	22	12	14
51370016010	1	0	6	0	1	1	1	0	3	1	1	1	3	3	1	1	1	2	1	0	1	1	0	0	0	1	1	1	2	1	0	1	0	0	0	0	0	0	8	6	2	1	1	1	4	1	16	5	5
51370018010	0	0	9	1	1	0	1	0	3	3	3	3	9	2	1	3	1	1	1	0	1	1	0	0	1	1	2	1	1	1	0	1	0	0	0	0	0	1	10	6	3	2	1	2	1	1	16	6	4
51370019010	1	1	11	1	0	0	0	0	1	2	2	3	7	3	3	4	2	3	3	0	2	3	0	1	1	3	3	1	1	1	0	0	1	0	0	0	0	1	16	4	3	2	3	3	3	3	21	10	10
51370020000	1	0	9	0	1	1	1	0	3	2	4	4	10	4	4	3	2	5	1	0	2	1	0	0	0	4	5	1	3	1	0	1	1	0	0	0	0	0	17	5	4	2	3	3	6	1	24	11	10
51370021000	1	1	20	1	3	1	0	0	5	4	4	3	11	4	2	2	1	1	2	0	1	1	0	1	1	5	2	2	1	1	0	1	0	0	0	0	0	1	16	6	4	1	3	4	6	1	25	8	5
51370022000	0	0	6	1	0	1	1	0	3	5	5	5	15	5	5	5	1	1	1	0	1	1	0	0	0	1	2	1	1	1	0	0	0	0	0	0	0	0	7	6	4	6	6	1	1	6	30	15	4
51370023000	0	0	3	1	0	1	1	0	3	4	4	5	13	5	4	5	1	1	1	0	1	1	0	0	0	2	2	1	1	1	0	0	0	0	0	0	0	0	8	6	3	3	4	2	4	1	23	14	4
51370026000	1	1	6	1	2	1	1	0	5	3	3	3	9	4	3	4	2	1	1	0	1	2	0	1	1	2	2	1	1	1	0	0	1	0	0	0	0	1	13	6	3	4	4	4	2	2	25	11	5
51370027010	0	0	1	1	1	0	1	1	4	1	1	3	5	2	2	2	1	3	2	1	1	1	0	0	0	3	2	1	1	1	0	0	0	0	0	0	0	0	9	1	1	1	1	2	1	1	8	6	8
51370029010	1	0	3	0	1	0	1	0	2	2	4	3	9	4	3	4	3	2	2	0	3	2	0	0	0	2	2	1	2	2	0	0	0	0	0	0	0	0	11	2	3	3	2	1	6	2	19	11	10
51370030000	1	0	3	1	0	0	0	0	1	3	3	3	9	4	5	4	3	4	1	1	5	1	0	0	0	3	2	1	1	5	0	1	0	0	0	0	0	1	15	4	2	1	2	4	3	2	18	13	14
51370032000	1	1	18	1	1	1	1	0	4	4	4	4	12	4	3	4	4	1	3	1	2	3	0	1	1	4	2	1	4	3	1	0	0	0	0	0	1	1	22	3	2	1	1	3	5	2	17	11	11
51370033000	1	0	5	1	2	0	1	0	4	2	4	3	9	3	2	1	3	1	2	0	1	2	0	0	0	2	2	1	1	1	0	1	0	0	0	0	0	0	10	5	4	2	4	5	2	2	24	6	7
51370035000	0	0	4	1	3	1	1	0	6	3	4	2	9	4	3	3	3	3	1	0	2	1	0	0	0	2	2	1	1	1	0	1	0	0	0	0	0	1	10	6	3	2	3	2	6	2	24	10	9
51370037000	1	1	7	1	6	1	1	1	10	2	3	3	8	1	5	4	3	1	1	0	1	1	0	0	0	1	2	1	1	1	0	1	0	0	0	0	0	0	8	4	2	3	2	2	4	1	18	10	6
51370040000	0	0	5	1	0	0	1	0	2	3	3	2	8	1	2	3	2	1	1	0	2	1	0	0	0	2	2	1	1	3	0	0	0	0	0	0	0	0	10	4	2	1	3	2	2	1	15	6	6
51370042000	1	1	4	1	0	1	1	0	3	3	3	2	8	3	4	3	2	1	2	0	2	1	0	0	0	2	4	1	3	3	0	0	1	0	0	0	0	0	15	5	3	1	2	2	3	1	17	10	7
51370043000	0	0	3	1	0	1	1	0	3	4	4	4	12	3	3	3	3	3	3	1	2	3	1	1	0	2	2	1	1	1	0	0	1	0	0	0	0	1	14	3	3	1	2	2	3	2	16	9	12
51370045000	0	1	5	0	6	1	1	0	8	3	3	3	9	3	2	3	1	1	3	1	5	1	0	0	0	2	3	1	1	1	0	0	0	0	0	0	0	0	9	5	4	5	1	1	2.75186	1	19.7519	8	11
51370046010	0	0	2	0	0	1	1	0	2	4	4	3	11	2	1	1	2	1	1	0	1	1	0	0	0	1	2	1	1	1	0	1	0	0	0	0	0	1	9	5	2	3	3	2	2	2	19	4	5
51370047010	0	0	5	0	0	1	0	0	1	5	1	4	10	4	3	2	2	2	1	0	1	1	0	0	0	1	2	1	1	2	0	1	0	1	0	0	0	0	10	2	2	4	1	2	4	1	16	9	6
51370050000	0	0	4	1	0	0	0	0	1	3	4	3	10	4	3	3	2	1	1	0	1	3	0	0	0	2	3	1	1	1	0	0	0	0	0	0	0	0	11	2	2	1	2	2	2	1	12	10	5
51370053000	1	0	20	1	0	1	1	0	3	3	3	3	9	2	2	1	1	1	1	0	1	1	0	0	1	1	2	1	1	1	0	0	0	0	0	0	0	0	8	2	1	1	2	1	3	1	11	5	4
51370054000	0	0	6	1	7	1	1	0	10	3	2	2	7	4	3	1	2	5	2	0	2	2	0	1	1	2	2	1	1	2	0	0	0	0	0	0	0	0	12	4	3	1	3	3	2	1	17	8	11
51370056000	0	0	2	1	0	1	1	0	3	4	4	3	11	5	3	4	1	2	1	0	1	3	0	0	0	2	1	1	1	1	0	0	0	0	0	0	0	1	10	5	4	1	3	3	2	1	19	12	5
51370058000	0	0	12	1	7	1	1	0	10	3	4	3	10	5	4	3	3	2	2	0	1	1	0	0	1	2	2	1	1	2	0	1	0	0	0	0	0	1	12	6	4	2	1	1	1	1	16	12	8
51370059000	0	0	6	1	2	0	1	0	4	3	4	3	10	4	3	4	3	3	2	0	2	4	1	1	1	3	4	1	2	2	0	1	0	0	0	0	0	1	21	4	2	1	3	4	2	3	19	11	10
51370061000	0	0	3	1	7	1	1	1	11	1	2	2	5	3	3	2	2	1	1	0	1	1	0	0	0	1	2	1	1	1	0	0	0	0	0	0	0	1	8	6	3	1	1	2	5	1	19	8	5
51370063000	0	0	20	1	2	1	1	0	5	5	5	3	13	4	2	3	2	1	2	0	3	1	0	0	1	2	2	1	2	5	0	1	0	0	0	0	0	0	15	6	4	6	3	2	6	1	28	9	8
51370064000	0	0	6	0	7	0	0	0	7	2	3	4	9	4	3	3	3	4	1	0	1	1	0	1	0	2	1	1	2	1	0	1	0	0	0	0	0	1	11	4	2	1	3	1	4	2	17	10	9
51370065000	0	0	7	1	2	1	0	0	4	3	3	3	9	2	3	4	3	1	1	0	1	2	0	0	0	3	3	1	1	1	0	0	1	0	0	0	0	0	12	3	3	2	3	5	2	3	21	9	6
51370066000	1	0	6	1	2	1	1	0	5	3	3	3	9	5	5	5	2	1	1	0	2	3	0	0	1	4	2	1	2	1	0	0	0	0	0	0	0	1	15	4	2	3	3	3	2	2	19	15	6
51370069000	0	0	5	1	7	1	1	0	10	2	2	4	8	1	1	1	1	1	1	0	1	1	0	0	0	1	1	1	1	1	0	0	0	0	0	0	0	0	6	5	2	1	1	1	5	1	16	3	4
51370071010	1	0	6	1	3	1	1	0	6	4	5	3	12	5	1	1	2	3	1	0	3	1	0	1	0	2	1	1	3	1	0	0	0	0	0	0	1	1	12	5	4	1	2	3	3	2	20	7	9
51370073000	0	0	9	1	2	1	1	0	5	3	4	3	10	3	4	2	4	1	1	0	1	1	0	0	0	1	1	1	1	1	0	1	0	0	0	0	0	1	8	4	2	1	1	1	2	1	12	9	7
51370075010	0	0	11	1	4	1	1	1	8	4	4	3	11	5	2	2	2	4	1	0	1	1	0	0	0	5	1	1	1	1	0	1	0	0	0	0	0	0	11	6	4	2	2	4	6	1	25	9	8
51370077000	0	0	10	1	2	1	0	0	4	3	3	3	9	5	3	2	3	2	1	1	1	1	0	0	1	5	2	1	1	1	1	1	1	0	0	0	0	1	16	6	3	2	4	6	3	1	25	10	8
51370078010	1	1	20	1	1	1	1	0	4	3	4	4	11	3	2	4	2	1	1	0	1	1	0	0	1	3	3	2	1	3	0	1	1	0	0	0	0	1	17	5	3	1	1	5	2	1	18	9	5
51370079000	0	0	10	0	6	1	1	0	8	2	3	3	8	5	1	1	1	1	1	0	1	1	0	0	0	5	3	1	1	1	0	0	0	0	0	0	0	1	13	3	1	1	2	4	3	1	15	7	4
51370080010	1	0	5	0	2	0	1	0	3	2	1	2	5	3	2	3	1	1	1	0	1	1	0	0	0	1	2	1	1	1	0	1	0	0	0	0	0	0	8	4	2	1	1	1	1	1	11	8	4
51370081000	1	0	5	1	2	1	0	0	4	2	3	3	8	3	3	4	3	5	1	0	1	1	0	0	0	4	2	1	1	1	0	1	1	0	0	0	0	0	12	4	3	1	3	4	2	1	18	10	10
51370082000	1	1	3	1	2	1	1	0	5	3	3	3	9	3	1	3	3	3	2	1	3	2	0	0	0	5	5	3	3	2	1	0	1	0	0	0	0	1	23	4	3	4	3	4	2	2	22	7	12
51370083000	1	1	11	1	1	1	0	0	3	2	1	2	5	5	3	1	1	1	1	0	1	1	0	1	1	1	2	1	1	1	0	1	1	0	0	0	0	1	12	4	2	1	1	1	4	1	14	9	4
51370084000	1	1	5	1	1	0	1	0	3	3	3	2	8	3	4	3	1	5	1	0	1	1	0	0	0	5	3	1	1	1	0	0	0	0	0	0	0	1	13	4	2	1	1	3	1	1	13	10	8
51370085000	1	1	12	1	3	1	1	0	6	2	3	3	8	4	5	1	2	3	1	0	1	3	0	0	0	3	2	1	1	1	0	1	0	0	0	0	0	1	13	6	2	6	6	3	6	2	31	10	7
51370086000	1	0	8	1	5	0	1	0	7	2	3	3	8	3	1	2	3	3	1	0	2	1	0	0	0	3	3	1	1	3	0	1	0	0	0	0	0	1	14	6	5	1	1	4	1	1	19	6	9
51370087000	1	1	11	1	3	1	1	0	6	2	3	3	8	4	2	3	3	3	2	0	2	1	0	0	0	3	3	1	1	1	0	1	0	0	0	0	0	1	12	5	2	2	2	4	1	1	17	9	10
51370004011-22503	1	0	3	0	0	0	1	0	1	3	3	2	8	3	1	2	2	1	1	0	1	1	0	0	1	3	2	1	1	1	0	1	0	0	0	0	0	0	11	3	2	1	1	2	2	1	12	6	5
51370006012-10010-10011	1	1	7	0	0	0	0	0	0	3	3	3	9	3	2	3	3	3	1	0	1	1	0	0	0	4	3	1	1	1	0	1	1	0	0	0	0	1	14	4	2	1	1	3	3	1	15	8	8
51370008001-22503	1	1	5	0	1	1	1	0	3	1	1	1	3	3	3	3	1	3	3	0	5	3	0	0	0	3	3	1	3	3	0	0	0	0	0	0	0	0	16	2	4	3	3	3	1	3	19	9	12
51370010104-20503-21003-21004-22503	1	1	1	0	0	0	0	0	0	2	2	2	6	3	3	3	2	2	1	0	1	2	0	1	0	4	3	1	1	2	1	1	1	0	0	0	0	1	18	3	3	2	1	2	3	2	16	9	6
51370017011-22806	1	0	8	1	1	1	1	0	4	2	2	2	6	4	3	3	1	5	1	0	1	1	0	0	0	1	1.98306	1	1	2	0	1	1	0	0	0	0	1	10.9831	1	1	1	1	3	1	1	9	10	8
51370024001-22503	0	0	5	1	2	1	1	0	5	4	3	3	10	5	5	5	3	1	1	0	1	1	0	0	0	3	3	1	2	2	0	1	0	0	0	0	0	0	13	5	3	1	4	4	2	1	20	15	6
51370025011-22503	1	0	3	0	2	0	0	0	2	3	4	4	11	2	1	1	1	2	1	0	1	1	0	0	1	5	2	1	1	1	0	0	0	0	0	0	0	0	12	3	2	1	1	2	3	1	13	4	5
51370028101-21606	0	0	6	1	1	1	1	1	5	2	1	2	5	1	1	1	2	1	1	0	1	1	0	0	0	1	2	1	1	1	0	1	1	0	0	0	0	0	9	6	4	1	1	1	6	1	20	3	5
51370031004-21403-21406-21408-21409	0	0	5	1	5	1	1	0	8	3	4	3	10	4	3	5	3	3	1	0	5	2	1	0	0	3	3	1	1	1	0	1	0	0	0	0	0	1	14	6	3	1	3	4	6	1	24	12	12
51370034111-22503	0	0	11	0	0	1	0	0	1	2	3	2	7	3	4	3	1	2	1	0	1	1	0	0	0	1	1	1	1	1	0	0	0	0	0	0	0	0	6	2	1	1	1	1	1	1	8	10	5
51370036012-22403-22502	1	1	3	0	0	0	0	0	0	2	2	2	6	3	1	1	3	3	1	0	1	2	0	0	0	3	3	1	1	1	0	1	0	0	0	0	0	0	12	5	4	1	2	2	4	3	21	5	8
51370038001-10003	1	0	12	1	2	1	0	1	5	3	3	3	9	3	3	4	4	3	2	1	1	3	0	0	1	2	3	1	2	1	0	0	0	1	0	0	0	1	15	6	3	2	2	2	2	2	19	10	11
51370039011-22503	1	1	6	1	0	1	1	1	4	2	3	3	8	3	1	2	2	1	1	0	1	1	0	0	0	5	3	1	1	1	0	0	0	0	0	0	0	0	12	4	3	1	5	6	4	1	24	6	5
51370041001-22102	1	1	4	0	2	1	1	1	5	4	4	4	12	4	1	1	1	1	1	0	1	1	0	0	0	1	1	1	1	1	0	0	0	0	0	0	0	1	7	4	2	1	1	3	3	1	15	6	4
51370044001-10009	1	0	#NULL!	0	0	0	0	0	0	1	2	2	5	3	1	1	3	2	1	0	3	1	0	0	1	5	3	1	1	2	1	0	1	0	0	0	0	1	17	6	3	6	3	4	4	1	27	5	9
51370048002-10009-22503	0	0	#NULL!	1	3	1	1	0	6	3	2	2	7	4	4	4	1	1	1	0	1	1	0	0	0	1	1	1	1	1	0	0	0	0	0	0	0	0	6	6	3	3	3	1	6	1	23	12	4
51370049001-22503	0	0	7	1	5	1	1	0	8	3	3	3	9	2	5	5	1	2	1	0	1	1	0	0	0	1	1	1	1	2	0	0	0	0	0	0	0	1	8	6	3	6	1	3	6	2	27	12	5
51370051101-21606	0	0	13	0	4	1	1	0	6	3	3	3	9	4	3	3	3	3	1	0	2	1	0	0	0	4	3	1	1	2	0	1	0	0	0	0	0	1	14	6	5	1	2	2	6	1	23	10	9
51370052001-22503	0	0	6	0	1	1	0	0	2	2	2	2	6	2	2	2	3	3	3	0	2	3	0	0	0	2	2	1	1	1	0	1	0	0	0	0	1	1	13	4	2	1	3	3	4	3	20	6	11
51370055011-10008	1	1	6	0	3	0	1	0	4	2	2	2	6	2	2	2	2	2	1	0	1	1	0	0	0	1	2	1	2	1	0	0	0	0	0	0	0	0	8	5	3	3	2	2	3	2	20	6	6
51370057001-22503	0	1	3	1	2	1	0	0	4	2	3	2	7	5	3	5	1	1	1	0	1	1	0	1	1	1	1	1	1	1	0	0	0	0	0	0	0	0	8	5	3	1	1	4	1	1	16	13	4
51370060114-10007-20804-21606-22503	0	0	1	1	1	0	1	1	4	4	4	4	12	4	3	3	2	2	1	0	1	1	0	0	0	2	3	1	1	1	0	0	0	0	0	0	0	0	9	2	2	3	3	3	3	3	19	10	6
51370062002-10008-22503	1	0	2	0	2	0	1	0	3	2	3	3	8	1	4	4	1	3	1	1	2	2	0	0	0	3	2	1	1	1	0	0	0	0	0	0	0	0	10	4	2	2	2	2	4	2	18	9	8
51370067011-21606	0	0	3	1	0	1	1	0	3	1	1	3	5	4	1	1	1	1	1	0	1	1	0	1	0	3	2	1	1	1	0	0	0	0	0	0	0	0	10	5	2	1	1	2	1	1	13	6	4
51370068001-10005	0	0	10	1	6	1	0	0	8	1	1	3	5	3	1	1	1	1	1	0	1	1	0	0	0	2	2	1	1	1	0	1	0	0	0	0	0	0	9	6	3	3	4	2	2	2	22	5	4
51370070001-22703	0	0	4	0	1	1	1	1	4	1	1	3	5	3	1	1	2	1	1.41812	1	1	2	0	0	0	3	1	1	1	1	0	1	0	0	0	0	0	0	10	3	2	1	1	2	4	1	14	5	6.41812
51370072001-22503	1	1	4	0	1	0	1	0	2	3	3	4	10	3	2	3	1	1	1	0	1	1	0	0	0	1	1	1	1	1	0	0	0	0	0	0	0	0	6	5	2	3	3	1	2	3	19	8	4
51370074001-22503	1	1	6	1	0	0	1	0	2	3	3	3	9	2	3	4	3	1	2	0	1	2	1	1	1	2	2	1	5	1	0	0	1	0	0	0	0	0	17	4	2	3	3	3	2	3	20	9	7
51370076001-22503	1	1	2	1	0	1	0	0	2	3	3	3	9	3	2	3	2	3	2	1	2	2	0	0	0	1	3	1	2	2	0	1	1	0	0	0	0	0	13	5	3	2	2	4	2	5	23	8	10
51194001010	1	0	1	1	0	1	1	0	3	2	2	2	6	3	3	3	1	1	1	0	1	1	0	0	0	1	1	1	1	1	0	0	0	0	0	0	0	1	7	4	2	1	1	1	1	1	11	9	4
51194003000	1	0	1	1	2	1	1	0	5	2	2	3	7	3	4	3	3	2	1	1	1	2	0	0	0	2	2	1	1	1	0	0	0	0	0	0	0	1	10	2	3	2	2	2	5	2	18	10	8
51194004010	1	1	16	1	7	1	1	0	10	2	3	3	8	4	3	5	1	1	1	0	1	2	0	0	1	2	2	1	1	1	0	1	1	0	0	0	0	0	12	5	3	2	3	2	2	1	18	12	4
51194006010	1	1	6	1	0	1	1	0	3	3	3	2	8	1	2	3	1	1	1	0	1	1	0	0	0	2	2	1	1	2	0	1	0	0	0	0	0	1	11	4	3	2	1	3	5	1	19	6	4
51194007010	1	1	3	1	0	1	1	0	3	3	3	3	9	3	2	3	1	1	1	0	1	1	0	0	1	5	1	1	1	1	0	1	0	0	0	0	0	0	12	2	2	1	1	3	2	1	12	8	4
51194008000	1	1	20	0	0	1	0	0	1	3	3	3	9	2	1	2	1	2	1	0	1	2	0	0	0	5	1	1	1	1	0	0	0	0	0	0	0	1	12	4	2	2	2	4	5	2	21	5	5
51194009000	1	1	8	1	0	1	1	0	3	3	4	2	9	1	1	1	1	1	1	0	3	1	0	0	0	2	1	1	1	3	0	0	0	0	0	0	0	1	10	5	4	3	4	3	3	1	23	3	6
51194010010	1	0	3	0	0	0	0	0	0	2	2	2	6	1	2	2	2	2	2	0	1	1	0	0	0	3.08987	3	1	1	1	0	1	0	0	0	0	0	0	11.0899	4	3	1	2	3	1	2	16	5	7
51194011000	1	0	11	1	0	0	0	0	1	2	2	2	6	3	3	3	2	2	2	0	1	1	0	0	1	2	1	1	1	1	0	0	0	0	0	0	0	1	9	3	2	3	3	2	4	3	20	9	7
51194013000	1	0	11	0	0	0	0	0	0	3	3	3	9	4	3	4	2	1	1	0	1	1	0	1	1	2	2	1	1	2	0	1	0	0	0	0	0	0	12	5	4	1	1	2	2	1	16	11	5
51194014000	1	0	2	0	0	0	0	0	0	3	2	2	7	3	3	3	1	1	1	0	1	1	0	0	0	5	3	1	1	1	0	1	1	0	0	0	0	0	14	2	1	1	1	2	2	2	11	9	4
51194016000	1	0	1	0	0	0	0	0	0	1	3	1	5	3	1	1	4	3	1	0	3	3	0	0	0	3	2	2	2	5	0	1	0	0	0	0	0	0	18	4	2	2	2	4	1	1	16	5	11
51194019000	1	1	10	0	0	0	0	0	0	3	4	4	11	4	3	5	1	2	1	0	1	2	0	0	0	4	3	1	1	1	0	0	0	0	0	0	0	0	12	3	2	1	1	3	4	1	15	12	5
51194020000	0	0	2	1	0	0	1	0	2	3	3	3	9	4	2	3	3	2	1	0	1	1	0	1	0	3	2	1	1	1	0	1	1	0	0	0	0	1	13	5	2	1	2	3	4	1	18	9	7
51194021000	1	1	20	0	0	0	0	0	0	2	1	2	5	3	1	1	1	1	1	0	1	2	0	0	0	1	1	1	1	1	0	0	0	0	0	0	0	0	7	2	1	1	1	1	5	1	12	5	4
51194023010	1	0	1	1	0	1	0	0	2	1	1	1	3	3	2	1	2	1	1	0	1	1	0	0	0	5	2	1	1	3	0	1	0	0	0	0	0	0	14	3	2	1	1	5	1	1	14	6	5
51194024010	1	0	6	1	1	1	1	0	4	1	1	2	4	3	1	1	1	1	1	0	1	1	0	0	0	1	1	1	1	2	0	0	0	0	0	0	0	0	7	2	1	1	1	1	1	1	8	5	4
51194026010	1	0	5	0	2	1	0	0	3	2	3	3	8	4	2	4	3	1	1	0	1	1	0	0	0	1	1	1	1	2	0	0	0	0	0	0	0	1	8	2	2	4	2	1	1	1	13	10	6
51194027000	1	1	10	0	2	0	0	0	2	3	4	3	10	4	1	1	3	3	1	1	1	1	0	1	1	2	4	1	3	2	0	0	1	0	0	0	0	0	16	3	3	5	5	3	3	2	24	6	9
51194028000	1	1	12	1	0	1	0	0	2	3	3	2	8	2	1	1	3	1	1	0	1	1	0	0	0	1	1	1	1	1	0	0	1	0	0	0	0	1	8	5	3	1	1	1	3	1	15	4	6
51194029000	1	1	10	0	7	1	1	0	9	3	2	2	7	3	2	2	2	5	1	0	1	1	0	0	1	3	3	1	1	1	0	0	0	0	0	0	0	0	11	6	3	2	5	4	2	5	27	7	9
51194030000	1	0	11	1	0	0	0	0	1	5	5	5	15	5	2	1	2	4	2	0	3	2	0	0	0	3	3	1	3	3	1	1	1	0	0	0	0	0	18	3	1	1	1	1	1	1	9	8	11
51194031000	0	0	4	0	0	1	1	0	2	1	1	1	3	3	4	3	3	3	1	0	1	1	0	0	0	2	2	1	1	3	0	0	0	0	0	0	0	1	11	6	4	1	2	2	6	1	22	10	8
51194032000	1	0	13	0	0	0	0	0	0	5	5	5	15	5	3	4	3	2	1	0	1	1	0	1	1	2	2	1	2	2	0	1	1	0	0	0	0	1	15	2	2	1	1	1	1	1	9	12	7
51194033000	1	0	20	1	0	1	1	0	3	2	1	3	6	3	3	1	1	2	1	0	1	1	0	0	0	1	2	1	1	2	0	1	1	0	0	0	0	0	10	6	3	1	1	1	2	1	15	7	5
51194034000	0	0	4	1	2	1	0	0	4	3	3	3	9	4	1	3	3	4	1	0	3	2	0	1	0	3	2	1	1	1	0	0	0	0	0	0	0	1	12	4	2	1	3	4	4	3	21	8	11
51194035000	1	0	6	1	0	1	1	0	3	2	2	2	6	3	1	1	2	1	1	0	2	1	0	0	0	2	2	1	1	2	0	0	0	0	0	0	0	0	9	5	2	1	1	2	3	1	15	5	6
51194038000	0	0	5	0	2	1	1	0	4	4	4	3	11	4	3	2	4	4	3	1	3	3	1	1	1	2	2	3	3	2	0	1	0	0	0	0	0	0	19	3	4	6	3	5	6	2	29	9	15
51194039000	0	0	4	1	0	0	1	0	2	1	1	1	3	1	1	1	1	1	1	0	1	1	0	0	0	2	2	1	1	1	0	0	0	0	0	0	0	0	8	2	1	1	1	2	1	1	9	3	4
51194040000	1	0	3	0	0	1	0	0	1	3	4	3	10	1	3	1	2	4	1	0	3	1	0	1	0	3	2	1	3	5	0	0	0	0	0	0	0	0	16	3	3	1	2	5	2	1	17	5	10
51194042010	0	0	6	1	3	1	1	0	6	3	4	2	9	4	3	2	1	1	2	0	1	1	1	0	0	2	3	1	1	2	0	0	0	0	0	0	0	0	11	3	2	1	2	2	4	2	16	9	5
51194043000	0	0	6	1	1	1	1	0	4	3	3	2	8	4	1	2	1	2	1	0	2	1	0	0	0	5	2	1	1	1	0	1	0	0	0	1	0	1	14	5	2	4	2	2	4	1	20	7	6
51194044000	1	0	7	0	2	1	1	0	4	4	4	3	11	3	1	4	5	3	4	0	1	2	0	0	0	2	2	1	1	3	0	0	1	0	0	0	0	1	13	3	2	3	2	1	2	1	14	8	13
51194046000	1	0	1	0	0	0	0	0	0	1	1	3	5	2	1	1	3	1	2	0	1	1	0	0	0	2	1	1	1	1	0	0	0	0	0	0	0	0	7	2	2	2	2	1	3	1	13	4	7
51194048000	1	1	8	1	1	1	1	0	4	3	2	3	8	2	1	2	2	1	1	0	1	2	0	0	0	2	1	1	1	2	0	0	1	0	0	0	0	1	11	6	2	1	3	2	2	1	17	5	5
51194049110	0	0	5	1	3	0	1	0	5	1	1	1	3	3	4	1	1	1	1	0	1	1	0	0	0	3	2	1	1	1	0	0	0	0	0	0	0	0	9	4	2	1	1	1	1	1	11	8	4
51194050000	1	0	6	0	0	0	1	1	2	2	2	2	6	3	1	2	2	3	1	0	2	1	0	1	0	1	1	1	1	1	0	1	0	0	0	0	0	0	8	2	1	1	2	1	2	2	11	6	8
51194051010	0	0	6	0	0	1	0	0	1	3	3	3	9	4	4	4	2	5	1	0	1	1	0	0	0	3	3	1	1	2	0	1	1	0	0	0	0	1	14	4	2	1	1	4	4	1	17	12	9
51194052000	1	1	2	1	4	1	1	0	7	3	3	2	8	4	3	4	2	1	1	0	1	2	0	0	0	1	2	1	2	2	0	0	1	0	0	0	0	0	11	4	3	1	1	3	4	1	17	11	5
51194054010	1	1	3	1	2	1	1	0	5	3	4	4	11	3	3	3	1	2	1	0	2	1	0	0	0	5	4	1	1	1	0	0	0	0	0	0	0	0	13	4	2	1	1	2	2	1	13	9	6
51194055010	1	1	1	1	2	0	0	0	3	1	3	1	5	4	2	2	1	2	1	0	2	1	0	0	0	2	2	1	1	1	0	0	1	0	0	0	0	0	9	4	2	1	1	4	1	1	14	8	6
51194056000	1	1	2	1	0	1	1	0	3	2	2	3	7	4	3	2	4	1	1	0	1	2	0	0	0	2	1	1	2	1	0	0	1	0	0	0	0	0	10	4	3	1	2	2	4	1	17	9	7
51194059010	0	0	1	1	1	1	1	0	4	2	1	1	4	3	3	1	2	2	1	0	1	1	0	0	0	1	2	1	1	2	0	1	0	0	0	0	0	1	10	4	2	3	2	1	2	1	15	7	6
51194061000	0	0	12	1	2	1	0	0	4	5	5	5	15	5	5	5	4	2	2	0	1	4	1	0	0	2	3	1	4	3	0	0	0	0	0	0	0	0	18	2	1	1	1	1	4	1	11	15	9
51194063010	1	1	10	1	5	0	1	0	7	2	2	3	7	3	2	3	1	2	1	0	2	1	0	0	0	4	1	1	1	2	0	0	0	0	0	0	0	0	10	4	2	1	2	3	1	1	14	8	6
51194065010	0	0	4	0	2	1	0	0	3	3	3	2	8	4	2	3	1	1	1	0	1	1	0	0	0	1	2	1	1	1	0	0	0	0	0	0	0	1	8	5	2	1	1	1	2	1	13	9	4
51194068000	0	0	11	0	0	1	0	0	1	1	1	1	3	3	4	4	2	2	1	0	1	1	0	1	0	3	1	1	1	1	0	0	0	0	0	0	0	0	9	2	2	1	1	2	3	2	13	11	6
51194069010	0	0	8	1	4	0	0	0	5	3	3	3	9	3	1	1	2	5	1	0	1	1	0	0	0	3	2	1	1	1	0	1	0	0	0	0	0	1	11	5	3	1	3	1	4	3	20	5	9
51194070000	1	1	20	1	3	1	0	0	5	2	3	2	7	4	2	4	2	2	2	0	2	1	0	0	0	1	2	1	1	1	0	1	1	0	0	0	0	0	9	6	4	4	3	1	2	1	21	10	8
51194002002-22801-22802	1	0	4	1	0	1	0	0	2	3	3	2	8	4	3	4	2	2	2	0	1	1.62432	0.130436	0	0	2	1	1	2	3	0	0	0	1	0	0	0	0	11.7548	4	1	2	1	2	4	2	16	11	7
51194005001-21902	0	1	18	1	6	1	1	0	9	4	4	4	12	4	4	3	3	5	1	1	1	1	0	0	0	1	2	1	1	1	0	0	0	0	0	0	0	0	7	6	5	4	4	4	6	3	32	11	11
51194012001-21606	1	0	4	0	0	0	0	0	0	3	3	3	9	3	2	3	3	1	1	0	1	1	0	0	0	3	2	1	1	1	0	1	0	0	0	0	0	1	11	4	2	1	1	3	2	1	14	8	6
51194015002-22401-22803	1	0	9	0	3	1	1	0	5	1	1	1	3	4	4	4	5	3	3	0	4	3	1	0.493206	0	2	3	3	3	3	0	0	0	0	0	0	0	0	18.4932	1	2	5	5	5	5	5	28	12	15
51194017002-10009-22505	1	1	#NULL!	1	0	1	1	0	3	3	2	3	8	3	2	2	3	3	3	0	3	3	0	0	1	3	4	1	2	2	0	1	1	0	0	0	0	1	19	4	3	2	2	3	3	2	19	7	12
51194018001-21606	0	0	15	1	7	1	0	0	9	1	1	1	3	2	2	2	1	2	1	0	1	1	0	0	0	2	2	1	1	1	0	0	0	0	0	0	0	1	9	5	3	1	1	1	4	1	16	6	5
51194022001-21606	1	0	5	1	0	0	0	0	1	3	3	3	9	4	3	1	1	1	1	0	1	1	0	0	0	1	2	1	1	1	0	0	0	0	0	0	0	0	7	2	1	1	1	2	1	1	9	8	4
51194025001-21606	0	1	4	1	0	0	1	0	2	3	4	4	11	3	1	2	1	1	1	0	1	1	0	0	0	5	1	1	1	1	0	0	0	0	0	0	0	0	10	6	3	1	1	2	1	1	15	6	4
51194036111-21606	0	0	10	1	0	1	0	0	2	1	3	3	7	1	4	1	1	1	1	0	1	1	0	0	0	2	2	1	1	1	0	1	0	0	0	0	0	0	9	2	2	2	1	3	2	2	14	6	4
51194037001-21606	0	0	6	1	4	1	1	0	7	2	2	2	6	2	3	3	2	3	1	0	3	1	0	0	0	2	1	1	2	2	1	1	1	0	0	0	0	1	13	6	2	1	1	1	6	1	18	8	9
51194041008-21403-21404-21405-21406-21407-21408-21409-21606	0	0	3	1	0	1	1	0	3	1	1	2	4	1	1	1	1	1	1	0	1	1	0	0	0	1	2	1	1	1	0	0	0	0	0	0	0	0	7	6	3	2	1	3	6	1	22	3	4
51194045011-22503	0	0	2	1	0	0	0	0	1	3	2	2	7	1	3	1	2	2	2	0	1	2	0	0	0	2	3	1	1	1	0	0	0	0	0	0	0	0	10	5	4	3	3	1	1	1	18	5	7
51194047001-22803	0	0	7	1	2	1	1	0	5	1	1	1	3	4	2	1	1	3	1	0	1	1	0	-0.013233	0	3	3	1	1	1	0	1	1	0	0	0	0	1	12.9868	3	2	1	1	1	2	1	11	7	6
51194053101-21606	0	1	3	1	7	1	1	0	10	4	4	4	12	3	4	4	1	1	1	0	1	1	0	0	1	2	2	1	1	2	0	1	0	0	0	0	0	0	11	6	3	1	4	2	3	1	20	11	4
51194057001-21703	0	0	12	0	1	0	1	0	2	1	1	1	3	1	1	1	1	1	1	0	1	1	0	0	0	1	2	1	1	2	0	0	0	0	0	0	0	1	9	2	3	2	1	1	1	1	11	3	4
51194058011-22503	1	1	5	0	4	1	1	1	7	3	4	4	11	4	2	5	1	1	1	0	1	1	0	0	0	1	2	1	1	1	0	0	1	0	0	0	0	0	8	5	3	1	1	1	1	1	13	11	4
51194060011-22204	1	0	4	0	2	0	0	0	2	3	3	1	7	1	1	1	2	2	1	0	1	1	0	0	0	2	4	1	1	1	0	0	1	0	0	0	0	0	11	3	1	1	1	1	1	1	9	3	6
51194062001-22704	0	0	11	0	0	0	0	0	0	4	4	4	12	4	4	4	1	1	1	-0.0604366	1	1	0	0	1	1	1	1	1	1	0	1	0	0	0	0	0	1	9	4	2	1	2	1	1	1	12	12	3.93956
51194064001-10002	0	#NULL!	10	0	0	0	0	0	0	2	1	1	4	2	2	2	2	3	2	1	2	2	1	0	0	3	2	2	2	1	0	0	0	0	0	0	0	0	13	2	3	2	2	2	2	3	16	6	10
51194066001-22503	1	0	6	0	0	1	1	0	2	3	3	2	8	2	2	1	2	2	2	0	1	2	0	0	1	3	1	1	1	1	0	0	1	0	0	0	0	1	12	4	3	2	2	2	4	2	19	5	7
51194067001-22503	1	1	18	1	6	1	0	0	8	5	4	3	12	5	2	4	2	4	1	0	1	1	0	0	1	2	2	2	1	1	1	1	0	0	0	0	0	1	13	6	5	1	2	3	5	1	23	11	8
51194071011-22503	1	1	5	1	7	1	1	1	11	2	3	4	9	1	3	2	1	3	1	0	1	1	0	0	1	1	2	1	1	1	0	0	1	0	0	0	0	1	10	2	3	3	2	2	1	1	14	6	6
52204001010	1	0	2	0	7	1	0	1	9	2	4	2	8	3	1	1	1	5	1	0	1	2	0	0	1	3	1	1	1	1	0	1	0	0	0	0	0	0	11	4	2	1	3	4	3	1	18	5	8
52204002000	0	0	4	1	0	1	0	0	2	2	1	1	4	3	1	2	2	1	1	0	1	1	0	0	0	5	1	1	1	1	0	1	1	0	0	0	0	0	12	6	4	5	4	1	1	1	22	6	5
52204003010	0	0	11	1	2	1	1	0	5	3	3	1	7	2	4	4	3	1	1	0	1	1	0	0	0	1	2	1	1	1	0	0	0	0	0	0	0	0	7	4	3	1	1	1	1	2	13	10	6
52204004000	0	0	1	1	0	1	0	0	2	4	4	4	12	3	4	5	2	3	1	0	1	1	0	0	0	3	2	1	1	1	0	0	1	0	0	0	0	0	10	4	3	4	3	4	4	3	25	12	7
52204005000	1	1	18	1	2	1	1	0	5	1	1	1	3	3	3	3	1	1	1	0	1	1	0	0	0	1	1	1	1	5	0	1	1	0	0	0	0	0	12	5	2	3	1	4	2	1	18	9	4
52204007010	1	0	10	1	2	1	1	0	5	1	1	1	3	1	1	1	1	1	1	0	1	1	0	0	0	1	1	1	1	1	0	0	0	0	0	0	0	0	6	1	1	1	1	1	1	1	7	3	4
52204008010	1	0	6	1	0	1	0	0	2	1	2	2	5	3	1	2	2	1	1	0	2	1	0	0	0	1	2	1	2	1	0	0	0	0	0	0	0	0	8	1	1	1	1	1	2	1	8	6	6
52204009000	1	1	10	0	2	1	0	1	4	2	2	1	5	3	1	2	3	2	1	0	2	1	0	0	0	3	2	1	1	1	0	0	1	0	0	0	0	0	10	2	1	2	1	1	4	1	12	6	8
52204010010	1	1	9	1	6	1	1	0	9	3	4	2	9	4	1	3	3	4	1	0	5	1	0	0	0	2	1	1	1	5	0	1	0	0	0	0	1	1	14	6	4	4	5	3	5	1	28	8	13
52204011010	1	1	1	0	1	1	0	1	3	1	2	2	5	3	3	4	1	1	1	0	1	1	0	0	0	4	3	1	1	1	0	0	0	0	0	0	0	0	11	4	3	1	1	1	2	1	13	10	4
52204012000	0	0	9	1	4	0	1	0	6	5	3	3	11	4	2	2	1	1	1	0	1	1	0	0	0	1	2	1	1	1	0	0	1	0	0	0	0	0	8	6	2	2	3	1	2	1	17	8	4
52204013000	0	0	2	1	0	1	1	0	3	3	3	3	9	3	1	4	1	2	1	0	1	1	0	0	0	2	2	1	1	1	0	0	0	0	0	0	0	0	8	6	3	1	1	3	2	1	17	8	5
52204014000	0	0	6	0	1	1	0	0	2	1	1	1	3	3	1	3	1	1	1	0	1	1	0	0	0	1	2	1	1	1	0	0	0	0	0	0	0	0	7	6	2	2	2	2	2	2	18	7	4
52204015000	0	0	8	1	0	1	0	0	2	3	3	3	9	3	2	3	3	4	3	0	1	1	0	0	1	1	2	1	1	1	0	0	0	0	0	0	0	0	8	4	3	1	1	1	1	1	12	8	11
52204017000	1	1	12	1	2	1	1	0	5	2	1	3	6	4	4	5	3	1	1	0	1	1	0	0	0	5	5	1	1	1	0	0	1	0	0	0	0	1	16	6	4	5	3	4	6	1	29	13	6
52204018000	1	0	18	1	1	0	1	0	3	4	4	5	13	5	3	3	1	1	1	0	1	2	0	0	0	2	3	1	1	1	0	1	1	0	0	0	0	1	13	6	3	2	4	3	5	1	24	11	4
52204019101	1	1	8	1	2	1	1	0	5	2	3	3	8	4	1	2	2	2	1	0	1	1	0	0	0	3	2	1	1	1	0	0	1	0	0	0	0	0	10	4	2	4	1	3	4	1	19	7	6
52204022000	1	1	3	1	0	0	1	0	2	3	3	3	9	3	3	3	1	1	1	0	1	1	0	0	0	1	2	1	1	1	0	1	1	0	0	0	0	0	9	4	3	1	3	3	3	1	18	9	4
52204023000	1	1	1	1	2	0	1	0	4	3	4	2	9	3	3	3	2	2	1	0	1	1	0	0	0	1	2	1	1	1	0	1	1	0	0	1	0	0	10	2	3	2	2	2	5	2	18	9	6
52204024000	1	1	6	1	5	0	0	0	6	2	2	2	6	3	3	3	1	1	1	0	1	1	0	0	1	2	1	1	1	1	0	0	0	0	0	0	0	0	8	6	2	3	3	2	3	1	20	9	4
52204025000	0	0	2	1	7	1	1	1	11	4	4	4	12	4	3	3	2	5	2	0	1	1	0	1	1	5	5	1	1	1	0	0	0	0	0	0	0	0	16	5	4	1	6	4	3	1	24	10	10
52204026010	0	0	1	1	1	1	0	0	3	2	2	3	7	2	2	1	3	1	1	0	2	1	1	1	0	1	1	1	1	1	0	1	0	0	0	1	0	1	11	3	2	1	2	2	4	2	16	5	7
52204027000	0	0	11	1	4	1	1	0	7	5	5	4	14	5	3	4	1	2	1	0	2	1	0	1	0	2	2	1	1	2	0	0	0	0	0	0	0	0	10	4	3	1	2	2	3	1	16	12	6
52204028000	0	0	20	1	5	1	1	0	8	3	3	4	10	4	3	2	1	3	1	0	1	1	0	1	0	2	2	1	1	1	0	0	0	0	0	0	0	0	9	4	3	4	3	2	5	1	22	9	6
52204029000	0	0	6	0	3	1	1	0	5	3	5	1	9	2	2	2	2	2	1	0	2	1	0	0	0	1	2	1	2	1	0	0	0	0	0	0	0	0	8	4	2	4	1	2	4	1	18	6	7
52204031100	1	0	5	1	0	1	1	0	3	2	2	2	6	3	3	4	3	2	2	0	3	2	0	1	0	3	2	1	1	1	0	1	1	0	0	0	0	0	13	5	4	1	1	1	5	1	18	10	10
52204033010	1	0	11	1	0	1	1	1	4	1	2	2	5	3	1	2	2	5	1	0	1	1	0	0	0	1	3	1	1	1	0	1	0	0	0	0	0	1	10	4	2	1	2	2	4	1	16	6	9
52204034000	1	0	5	1	3	1	1	0	6	3	1	1	5	4	2	4	2	1	1	0	1	1	0	0	0	1	1	1	1	1	0	0	0	0	0	0	0	0	6	4	3	2	1	2	2	1	15	10	5
52204035000	1	0	6	1	1	1	1	0	4	3	2	3	8	3	2	4	1	1	1	0	1	1	0	0	0	1	1	1	1	1	0	0	1	0	0	0	0	0	7	4	1	1	1	1	2	1	11	9	4
52204036000	0	0	5	1	2	1	1	0	5	3	3	3	9	4	2	4	3	1	1	0	1	1	0	0	0	1	2	1	1	1	0	0	0	0	0	0	0	0	7	6	2	1	5	1	4	1	20	10	6
52204037000	0	0	1	1	0	1	0	0	2	1	2	2	5	4	5	5	2	2	1	0	1	1	0	0	0	1	2	1	1	1	0	0	0	0	0	0	0	0	7	5	2	2	3	1	1	3	17	14	6
52204039000	1	1	6	1	5	1	1	0	8	2	3	2	7	5	3	3	2	5	2	0	1	2	0	0	0	2	2	1	1	1	0	0	0	0	0	0	0	1	10	5	4	2	2	6	3	1	23	11	10
52204040000	1	1	2	1	3	1	0	0	5	2	2	2	6	3	3	3	3	3	2	0	1	1	0	0	0	3	3	3	3	1	0	0	0	0	0	0	0	0	14	6	3	4	4	5	6	4	32	9	9
52204042000	1	0	10	1	2	1	0	0	4	2	2	2	6	3	2	2	1	3	1	0	1	1	0	0	0	5	2	1	1	1	0	0	0	0	0	0	0	0	11	6	3	4	1	3	3	1	21	7	6
52204043000	1	1	2	1	0	1	0	0	2	2	1	2	5	3	1	2	2	2	2	1	2	2	0	0	0	1	1	1	1	1	0	0	0	0	0	0	0	0	7	4	2	3	2	2	3	1	17	6	9
52204044000	1	1	15	1	1	0	1	0	3	2	2	2	6	3	2	2	1	1	1	0	1	1	0	0	1	1	1	1	1	1	0	0	0	0	0	0	0	0	7	3	4	2	2	1	2	1	15	7	4
52204047000	1	0	3	0	1	1	1	0	3	2	3	3	8	3	1	2	1	1	1	0	3	2	0	0	1	2	3	1	2	3	0	0	0	0	0	0	0	1	15	3	3	1	1	3	2	1	14	6	6
52204050000	0	0	5	1	0	1	1	0	3	4	4	3	11	4	4	1	3	2	2	1	3	2	0	1	1	5	1	1	1	3	0	0	0	0	0	0	1	0	16	6	3	2	3	3	1	1	19	9	11
52204052000	1	0	1	1	0	1	0	0	2	3	5	3	11	3	1	1	3	1	1	0	1	1	0	0	0	3	2	1	1	1	0	1	0	0	0	0	0	0	10	6	4	2	2	3	3	1	21	5	6
52204053010	0	0	20	1	2	1	1	0	5	4	4	4	12	5	5	5	1	2	1	0	1	1	0	0	0	2	2	1	1	2	1	1	1	0	0	0	1	1	14	4	3	1	1	3	2	2	16	15	5
52204055000	0	0	6	1	5	1	1	0	8	2	2	2	6	2	2	2	2	2	2	1	2	2	1	1	1	1	1	2	2	2	1	0	0	1	0	0	0	1	16	2	3	5	2	5	2	2	21	6	9
52204056000	1	1	5	1	2	1	1	0	5	4	4	3	11	4	1	3	3	5	3	0	3	2	0	0	1	5	4	1	1	1	1	1	0	0	0	0	0	1	18	6	2	1	2	6	2	1	20	8	14
52204059000	0	0	3	0	0	1	0	0	1	1	1	1	3	1	2	1	2	3	2	1	3	3	1	0	0	1	2	2	2	1	0	0	0	0	0	0	0	0	12	5	1	5	2	2	3	6	24	4	11
52204060000	0	0	20	1	0	1	0	0	2	3	3	1	7	5	3	3	2	2	2	1	2	2	1	1	0	2	2	2	2	1	0	0	0	0	0	0	0	0	13	6	3	5	4	3	4	3	28	11	9
52204006001-20306	0	0	2	0	0	0	1	0	1	3	3	3	9	3	3	3	1	3	3	1	2	4	0	1	0	3	2	1	1	1	1	0	1	0	1	0	1	0	17	3	3	2	2	2	5	2	19	9	10
52204016011-21203	0	0	6	1	1	0	0	0	2	2	2	2	6	1	2	3	2	3	1	0	1	1	0	0	1	5	2	1	1	1	1	0	0	0	0	0	1	0	14	3	1	1	2	3	3	1	14	6	7
52204020001-10007	0	0	2	1	0	1	1	0	3	4	3	2	9	4	3	2	2	1	1	0	1	1	0	0	0	2	1	1	1	1	0	0	0	0	0	0	0	0	7	3	3	3	2	2	3	1	17	9	5
52204021002-10004-22705	1	1	6	1	2	0	1	0	4	3	3	3	9	3	4	4	1	1	1	0	0.700004	1	1	1	1	2	2	1	1	1	0	1	1	0	0	0	0	0	13	5	3	1	4	4	4	1	22	11	3.7
52204030011-22503	1	0	2	1	4	1	1	0	7	5	4	4	13	4	2	4	1	1	1	0	1	1	0	0	0	1	1	1	1	1	0	1	0	0	0	0	0	1	8	5	2	1	2	1	1	1	13	10	4
52204032001-22204	1	1	16	1	1	1	1	0	4	3	2	2	7	2	1	1	4	4	1	0	1	1	0	0	0	1	3	1	1	1	0	1	0	0	0	1	0	0	10	6	4	5	4	1	5	1	26	4	10
52204038001-22503	0	0	5	1	2	0	0	0	3	3	3	3	9	4	3	1	2	2	2	1	1	1	0	0	0	2	2	1	1	2	1	0	0	0	0	0	0	1	11	4	2	3	3	3	3	3	21	8	8
52204041001-22503	1	1	14	1	2	1	1	0	5	3	3	3	9	3	2	1	2	1	1	0	1	1	0	0	0	4	4	1	2	3	0	1	1	0	0	0	0	0	17	2	3	1	1	3	2	1	13	6	5
52204045001-21301	0	0	2	1	7	0	1	0	9	3	3	3	9	3	3	4	2	2	2	0	2	1	0	0	0	1	1	1	1	1	1	0	0	0	0	0	0	0	7	3	2	3	3	3	3.0838	3	20.0838	10	8
52204046005-21301-21501-21802-22303-22704	0	0	2	1	1	0	0	1	3	1	1	1	3	5	5	5	5	5	5	1.11168	5	5	1	1	1	5	5	5	5	4	0	0	0	0	0	0	0	0	32	3.82441	5	6	3	5	3.74008	3	29.5645	15	21.1117
52204048001-10009	1	0	#NULL!	0	2	0	1	0	3	3	3	3	9	1	1	1	3	4	2	0	2	1	0	0	1	5	4	1	2	1	0	1	1	0	0	0	0	1	18	5	2	1	2	2	1	4	17	3	11
52204049001-20605	0	0	1	1	6	1	1	0	9	3	4	4	11	3	1	2	3	4	3	0	2	2	0	0	0	4	2	1	1	1	0	1	1	0	0	0	0	1	14	5	3	4	3	5	2	3	25	6	12
52204051001-10007	1	0	6	1	0	1	0	0	2	3	3	3	9	3	3	3	2	2	1	0	2	2	0	1	1	4	3	1	1	1	0	0	1	0	0	0	0	1	16	6	5	5	2	2	2	2	24	9	7
52204054111-21606	0	0	6	1	0	1	1	0	3	3	3	4	10	4	2	2	1	3	2	1	2	2	0	0	1	2	1	1	2	2	0	0	0	0	0	0	0	0	11	1	1	1	1	1	4	1	10	8	9
52204057001-22503	1	1	20	1	3	1	1	0	6	3	1	2	6	3	4	4	2	2	1	0	1	1	0	0	0	2	2	1	1	1	0	1	1	0	0	0	0	1	11	3	3	2	1	1	2	1	13	11	6
52204058003-21204-21301-22301	0	0	2	1	7	1	1	0	10	2	3	2	7	2	3	2	4	3	5	1	4	3	0	1	0	4	3	1	1	3	0	1	0	0	0	0	0	1	18	6	3	5	3	2	3.81696	3	25.817	7	17
52204061001-22503	1	0	3	1	0	1	0	0	2	2	2	3	7	3	3	3	1	1	1	0	1	1	0	0	0	1	1	1	1	1	0	0	0	0	0	0	0	1	7	4	2	1	1	2	2	1	13	9	4
52204062002-10011-22503	0	0	2	0	0	1	1	1	3	2	2	2	6	2	2	2	2	3	3	1	2	2	1	1	1	2	3	1	1	1	0	1	0	0	0	0	0	0	14	2	3	2	2	3	2	3	17	6	11
52214001000	1	0	5	1	2	1	0	1	5	3	1	2	6	1	3	3	2	3	2	0	3	2	0	0	0	3	3	1	1	1	0	1	0	0	0	0	0	1	13	4	2	2	2	2	2	1	15	7	10
52214002000	0	0	5	1	0	1	1	0	3	3	3	3	9	3	3	3	1	1	1	0	1	1	0	0	1	1	2	1	1	1	0	0	0	0	0	0	0	0	8	2	2	1	2	2	3	2	14	9	4
52214005010	1	0	3	1	0	0	1	0	2	2	3	2	7	3	4	4	1	1	1	0	1	1	0	0	1	2	3	1	1	1	0	0	0	0	0	0	0	0	10	2	2	2	1	2	3	2	14	11	4
52214006100	0	0	2	0	2	1	1	0	4	1	1	1	3	1	5	3	2	1	1	0	1	1	0	0	0	1	1	1	1	2	0	0	0	0	0	0	0	0	7	4	4	2	2	1	1	1	15	9	5
52214010010	0	0	3	0	1	1	1	0	3	2	3	1	6	4	1	1	3	2	1	0	1	1	0	0	1	2	2	1	1	1	0	0	1	0	0	0	0	0	10	3	1	1	2	2	4	2	15	6	7
52214013010	0	0	3	0	7	1	1	0	9	1	1	1	3	5	4	4	1	1	1	0	1	4	0	0	0	1	2	1	1	1	0	0	0	0	0	0	0	0	10	6	5	2	2	1	1	1	18	13	4
52214016000	1	0	5	1	1	0	0	0	2	3	4	4	11	3	3	3	2	1	1	0	5	2	0	0	0	5	2	1	2	2	0	1	1	0	0	0	0	1	17	4	2	2	4	5	1	1	19	9	9
52214017000	0	0	11	1	5	1	1	0	8	1	3	2	6	5	1	2	1	1	1	0	1	2	0	0	1	3	3	1	2	1	0	1	1	0	0	0	0	1	16	6	4	4	2	2	5	2	25	8	4
52214018010	0	0	10	1	1	1	1	0	4	3	3	4	10	5	1	4	1	1	1	0	1	1	0	0	0	2	1	1	1	1	0	0	0	0	0	0	0	0	7	6	2	1	1	1	1	1	13	10	4
52214021000	0	0	5	1	2	1	1	0	5	3	3	3	9	4	1	1	1	1	1	0	1	1	0	0	0	1	2	1	1	1	0	0	0	0	0	0	0	0	7	4	2	2	1	1	2	1	13	6	4
52214022000	1	0	7	1	2	0	1	0	4	2	3	3	8	4	1	3	3	1	1	0	1	1	0	0	0	5	5	1	1	1	0	1	1	0	0	0	0	1	17	5	2	3	2	3	2	1	18	8	6
52214023000	1	0	4	1	2	1	0	1	5	2	2	2	6	4	3	3	1	3	1	0	1	1	0	0	0	2	3	1	1	1	0	1	1	0	0	0	0	0	11	4	2	1	2	1	5	1	16	10	6
52214025000	1	0	2	0	0	0	0	0	0	1	3	3	7	3	2	1	2	1	1	0	1	1	0	0	0	2	2	1	1	1	1	1	1	1	0	0	0	0	12	2	1	1	1	1	3	1	10	6	5
52214026000	1	0	4	1	2	1	1	1	6	2	3	3	8	3	2	3	1	3	1	0	5	1	0	0	1	2	3	1	3	1	0	1	1	0	0	0	0	1	15	6	2	3	2	3	2	2	20	8	10
52214027110	0	0	7	1	0	0	0	0	1	3	3	4	10	1	5	3	2	1	1	0	1	1	0	0	1	2	2	1	1	1	0	0	0	0	0	0	0	0	9	6	3	1	2	1	6	1	20	9	5
52214028010	0	0	1	1	1	1	0	0	3	1	3	3	7	1	1	1	1	2	1	0	1	1	0	0	0	2	2	1	1	1	0	1	0	0	0	0	0	1	10	5	3	1	1	1	1	1	13	3	5
52214029000	0	0	5	1	1	1	0	1	4	3	4	4	11	2	4	2	2	3	2	1	2	2	0	0	0	3	2	1	2	5	1	1	1	0	0	0	0	1	19	2	3	2	5	5	3	6	26	8	10
52214030110	1	0	7	1	0	0	1	1	3	3	2	1	6	3	2	1	1	1	1	0	1	1	0	0	0	1	1	1	1	1	0	0	0	0	0	0	0	0	6	3	3	1	4	1	4	1	17	6	4
52214031010	1	1	7	0	0	0	1	0	1	3	3	3	9	5	2	4	1	1	1	0	1	1	0	0	0	1	1	1	1	1	0	1	0	0	0	0	0	1	8	6	4	3	2	3	4	1	23	11	4
52214032000	1	1	20	1	0	1	1	0	3	3	4	3	10	4	4	5	2	1	1	0	2	1	0	0	0	1	2	1	2	2	0	0	0	0	0	0	0	0	9	3	2	3	2	2	2	1	15	13	6
52214034000	1	1	4	1	3	1	1	0	6	3	3	3	9	3	3	2	3	1	1	0	4	1	0	1	0	5	2	1	1	5	1	1	1	0	0	0	0	1	20	6	4	4	2	3	4	1	24	8	9
52214035010	1	1	9	1	3	1	1	0	6	3	3	3	9	2	3	4	1	1	1	0	1	1	0	0	1	1	1	1	1	1	0	0	0	0	0	0	0	1	8	4	2	1	1	1	2	1	12	9	4
52214036000	1	1	8	1	1	1	1	0	4	2	2	3	7	3	3	3	2	3	1	1	1	1	0	0	1	2	2	1	2	2	1	1	1	0	0	1	0	1	16	5	3	1	1	2	4	1	17	9	8
52214040000	1	1	3	1	0	1	1	0	3	4	2	3	9	5	2	4	1	1	1	0	1	1	0	0	0	5	1	1	1	1	0	1	0	0	0	0	0	0	11	3	1	1	1	4	1	1	12	11	4
52214041000	1	1	9	1	4	1	1	1	8	1	2	1	4	2	5	3	3	1	1	0	3	1	0	1	0	2	2	1	1	2	0	1	1	0	0	0	0	1	13	5	4	5	3	2	5	1	25	10	8
52214042000	1	1	8	1	6	1	1	0	9	3	3	2	8	4	3	5	1	1	1	0	1	1	0	0	1	1	2	1	1	1	0	0	0	0	0	0	0	0	8	3	2	1	1	1	2	1	11	12	4
52214003011-10009	1	0	#NULL!	1	2	1	1	0	5	4	4	4	12	5	4	1	1	3	1	0	1	1	0	0	0	2	2	1	1	1	0	1	1	0	0	0	0	1	11	4	2	1	1	3	1	1	13	10	6
52214004105-10007-20904-21102-22202-22506	1	1	1	1	2	1	1	0	5	2	3	2	7	1	3	3	1	2	1	0	1	1	0	0	0	1	1	1	1	1	0	0	0	0	0	0	0	1	7	4	2	1	1	1	1	1	11	7	5
52214007011-22503	0	0	2	0	0	0	1	0	1	2	3	1	6	3	3	4	3	1	1	0	1	1	0	0	0	2	3	1	1	1	0	1	1	0	0	0	0	1	12	6	3	2	1	2	5	1	20	10	6
52214008001-21606	0	0	5	1	0	1	1	0	3	3	3	3	9	3	4	4	1	5	1	0	1	1	0	0	0	2	1	1	1	1	0	0	0	0	0	0	0	0	7	5	2	2	4	1	6	1	21	11	8
52214009002-10006-21606	0	0	6	1	2	1	1	0	5	3	3	3	9	3	3	1	2	1	1	0	1	1	0	0	1	2	2	1	1	1	0	0	0	0	0	0	0	1	10	4	2	1	2	1	1	2	13	7	5
52214011011-10006	0	0	9	1	0	1	1	1	4	2	3	3	8	3	3	3	1	1	1	0	1	1	1	0	1	1	2	1	1	1	0	0	0	0	0	0	0	1	10	5	4	5	3	1	1	3	22	9	4
52214012001-10004	1	0	5	1	2	1	1	0	5	3	3	2	8	4	3	3	2	4	1	0	4	1	0	0	1	1	2	1	1	3	0	0	0	0	0	0	0	1	11	4	2	2	3	2	2	1	16	10	11
52214014011-22503	1	0	11	1	0	0	0	0	1	2	1	1	4	3	5	5	1	1	1	0	1	1	0	0	0	2	1	1	1	1	1	1	1	0	0	0	0	1	11	5	3	1	1	1	4	1	16	13	4
52214015011-11605	1	0	14	0	0	0	0	0	0	2	2	2	6	3	3	2	1	2	1	0	1	1	0	0	0	1	1	1	1	2	0	0	0	0	0	0	0	0	7	5	2	1	1	2	3	1	15	8	5
52214019012-22504-22505	0	0	5	1	4	1	1	0	7	3	3	4	10	3	4	5	1	5	1	0	1	1	0	0	0	3	2	1	1	1	0	0	0	0	0	0	0	0	9	6	4	1	2	2	2	1	18	12	8
52214020013-10006-10007-22503	1	1	3	0	0	1	0	1	2	2	3	3	8	4	2	4	1	2	1	0	1	1	0	0	1	1	2	1	1	1	0	1	1	0	0	0	0	0	10	2	2	1	1	1	3	1	11	10	5
52214024001-10007	1	0	5	0	0	1	1	0	2	3	3	3	9	3	3	3	3	2	3	0	3	2	1	0	1	3	2	1	2	1	0	0	1	0	0	0	0	1	15	3	2	2	3	2	1	2	15	9	11
52214033001-10002	1	#NULL!	16	0	0	1	1	1	3	3	3	4	10	4	2	2	4	4	1	1	2	2	0	0	0	2	2	1	2	2	0	1	1	0	0	0	0	1	14	5	3	3	3	3	5	3	25	8	12
52214037002-22705-22802	1	1	20	1	2	1	1	0	5	2	3	3	8	3	4	4	2	5	2	0	2.19707	2	0.120247	0	1	2	2	1	1	3	0	0	0	0	0	0	0	1	13.1202	5	3	2	2	2	2	1	17	11	11.1971
52214038003-22601-22602-22702	1	1	20	1	5	1	1	0	8	3	3	2	8	3	3	4	3	2.81632	1	0	3	2	0	0	0	4	2	1	1	5	0	1	1	0	0	0	0	1	18	6	3	2	3	4	4	2	24	10	9.81632
52214039011-22503	1	1	5	1	1	1	0	0	3	3	4	3	10	2	3	1	3	5	1	0	5	2	0	0	0	5	1	1	3	1	0	1	0	0	0	0	0	0	14	6	3	3	6	3	6	1	28	6	14
52214043001-22503	1	1	5	1	2	1	1	1	6	2	3	2	7	1	3	3	3	2	1	0	2	1	0	0	0	1	2	1	1	1	0	0	1	0	0	0	0	1	9	4	2	3	2	2	2	1	16	7	8
52214044011-22005	1	1	15	1	2	1	0	0	4	3	4	3	10	5	1	4	1	1	1	0	1	1	0	0	0	1	1	1	1	1	1	0	1	0	0	0	0	0	8	6	4	1	1	1	6	1	20	10	4
52222001010	1	1	5	1	6	1	1	0	9	3	4	2	9	4	1	4	1	4	1	0	4	1	0	1	1	1	4	1	1	3	0	0	0	0	0	0	0	0	13	1	3	2	2	4	6	2	20	9	10
52222002010	0	0	6	1	6	1	1	1	10	3	2	3	8	4	1	3	2	1	2	0	1	3	0	0	0	3	2	1	2	1	1	0	0	0	0	0	0	0	13	4	2	1	2	2	2	1	14	8	6
52222003010	1	0	15	0	1	0	0	0	1	2	2	2	6	5	4	4	1	3	1	0	3	1	0	0	0	2	2	1	1	1	0	1	0	0	0	0	0	0	9	5	2	1	1	3	4	1	17	13	8
52222004000	0	0	2	1	3	1	0	0	5	4	4	4	12	2	1	2	3	4	1	0	1	1	0	1	0	3	2	1	1	1	0	1	0	0	0	0	0	1	12	5	3	1	5	5	3	1	23	5	9
52222005000	0	0	8	1	4	0	1	0	6	2	2	2	6	2	2	2	2	3	2	1	3	2	1	0	1	2	2	3	3	3	0	0	0	0	0	0	0	1	18	2	1	2	2	2	2	3	14	6	11
52222007000	1	1	5	1	3	1	0	0	5	3	4	4	11	5	3	3	1	1	1	0	1	1	0	1	1	2	1	1	1	1	0	1	1	0	0	0	0	1	12	5	2	3	2	2	1	2	17	11	4
52222009000	0	0	5	1	0	1	1	0	3	2	3	2	7	5	4	1	2	3	1	0	1	1	0	0	1	1	2	1	1	1	0	0	1	0	0	0	0	0	9	6	2	1	2	1	6	1	19	10	7
52222010010	1	0	9	0	1	0	1	1	3	2	3	2	7	3	1	2	3	2	2	1	2	2	0	0	1	3	2	1	1	1	0	1	0	0	0	0	0	0	12	2	2	2	2	2	3	2	15	6	10
52222011110	1	0	1	1	2	1	0	0	4	1	1	1	3	3	4	4	2	2	1	0	1	1	0	0	0	1	2	1	1	1	0	0	1	0	0	0	0	0	8	4	1	4	2	2	1	1	15	11	6
52222013000	1	1	7	1	2	1	1	0	5	2	4	3	9	4	3	4	1	2	1	0	1	1	0	0	1	1	1	1	1	2	0	0	0	0	0	0	0	0	8	2	2	1	1	1	1	1	9	11	5
52222014000	1	1	5	1	2	1	1	0	5	3	4	3	10	4	5	4	2	3	1	1	1	1	0	0	0	2	1	1	1	5	1	1	0	0	0	0	0	1	14	3	5	1	2	2	2	1	16	13	8
52222015000	1	0	1	1	3	1	1	1	7	3	3	3	9	4	4	4	3	1	1	0	1	1	0	1	0	2	2	1	1	1	0	1	0	0	0	0	0	1	11	6	3	2	6	5	3	1	26	12	6
52222006001-22810	0	0	2	1	4	0	1	0	6	4	4	4	12	5	3	2	2	5	1	0	5	1	0	0	0	2	1	1	1	1	0	0	0	0	0	0	0	0	7	6	3	5	5	3	3	1	26	10	13
52222008001-10004	1	1	11	1	7	1	1	0	10	3	3	3	9	3	2	3	3	3	2	0	1	1	1	0	0	2	2	1	3	2	0	1	0	0	0	0	0	1	14	3	5	5	5	3	4	3	28	8	9
52222012001-10006	1	0	9	0	0	0	1	0	1	1	3	1	5	1	1	1	2	2	1	0	2	2	0	0	0	1	1	1	2	1	0	0	1	0	0	0	0	0	9	3	1	1	2	2	4	1	14	3	7
52222016012-10009-22810	0	0	#NULL!	1	7	1	1	0	10	4	5	3	12	5	3	1	1	1	1	0	1	1	0	0	1	1	3	1	1	1	0	0	0	0	0	0	0	0	9	4	3	3	2	1	3	2	18	9	4
52222017012-22503-22803	0	0	10	1	1	1	1	1	5	4	4	4	12	5	5	3	3	1	1	0	1	1	0	0.197075	0	1	2	1	1	1	0	1	1	0	0	0	0	1	10.1971	5	3	2	3	3	4	1	21	13	6
60230001000	1	1	18	1	7	1	1	1	11	1	3	3	7	4	3	4	2	1	1	0	1	1	0	0	0	3	4	1	1	1	0	1	1	0	0	0	0	0	13	4	3	1	1	2	4	1	16	11	5
60230002000	1	1	3	1	4	1	1	1	8	3	3	3	9	4	3	4	3	1	2	1	3	2	0	0	0	4	1	1	2	3	0	0	1	0	0	1	0	1	16	4	4	4	4	3	3	1	23	11	10
60230003000	1	1	2	1	7	1	1	1	11	1	3	3	7	4	3	4	2	1	1	0	1	1	0	0	0	3	4	1	1	1	0	1	0	0	0	0	0	0	12	4	3	1	1	2	4	1	16	11	5
60230008010	0	1	3	1	7	1	1	1	11	3	3	3	9	3	3	3	2	1	1	0	1	2	0	0	0	5	3	1	1	1	1	1	1	0	0	1	0	0	17	4	3	2	2	3	2	2	18	9	5
60230009000	0	1	11	1	7	1	1	1	11	4	4	3	11	3	3	3	3	5	2	0	3	3	0	0	1	5	2	1	3	1	1	1	1	0	0	1	1	1	22	4	4	4	5	5	6	5	33	9	13
60230010000	0	1	2	1	3	0	0	0	4	4	4	3	11	4	2	3	1	1	1	0	1	1	0	0	0	2	1	1	1	4	0	0	0	1	0	0	0	0	11	6	4	1	6	3	2	1	23	9	4
60230011000	1	1	7	1	0	1	1	0	3	4	5	5	14	4	2	3	2	5	1	0	3	2	0	0	0	3	1	1	1	3	0	0	1	0	0	0	0	0	12	4	3	1	2	2	3	1	16	9	11
60230012000	1	1	4	1	7	1	1	0	10	3	4	3	10	4	2	3	2	3	1	0	1	1	0	0	0	5	1	1	1	1	0	1	1	0	0	0	0	1	13	5	3	2	1	2	1	1	15	9	7
60230013010	1	1	16	1	3	1	0	0	5	2	2	2	6	2	3	3	1	1	1	0	1	1	0	0	0	4	1	1	1	1	0	0	1	0	0	0	0	0	10	4	2	1	1	2	2	1	13	8	4
60230014000	1	1	18	1	1	1	1	0	4	4	3	3	10	2	2	1	2	1	1	0	1	2	0	0	0	4	1	1	2	1	0	0	1	0	0	0	0	0	12	4	2	4	1	5	1	3	20	5	5
60230015000	1	1	5	1	0	1	1	0	3	3	4	3	10	4	2	3	2	4	1	0	2	2	0	0	0	4	1	1	1	1	0	1	1	0	0	0	0	0	12	4	3	1	2	3	2	1	16	9	9
60230017000	1	1	1	0	7	1	1	1	10	3	3	2	8	4	2	3	3	5	3	0	1	1	0	0	0	1	1	1	1	1	0	1	1	0	0	0	1	0	9	5	3	2	3	3	2	3	21	9	12
60230019000	1	1	9	1	7	1	1	1	11	4	5	4	13	4	1	5	2	1	1	0	1	1	0	0	0	5	2	1	1	1	0	1	1	0	0	0	0	0	13	3	3	1	2	3	1	2	15	10	5
60230021000	1	1	18	1	7	1	1	1	11	1	3	3	7	4	3	4	2	1	1	0	1	1	0	0	0	3	4	1	1	1	0	1	1	0	0	0	0	0	13	4	3	1	1	2	4	1	16	11	5
60230022000	1	1	2	0	6	1	1	1	9	4	5	3	12	4	4	4	3	1	1	0	2	1	0	0	0	3	1	1	1	2	0	1	0	0	0	0	0	0	10	5	3	2	2	3	2	1	18	12	7
60230025000	0	1	7	1	7	1	1	1	11	3	4	2	9	4	2	2	4	5	1	0	3	1	0	1	1	3	1	1	1	5	0	1	1	0	0	0	0	1	17	6	3	3	2	2	3	1	20	8	13
60230026000	1	1	5	1	7	1	1	1	11	3	4	2	9	3	1	4	1	1	1	0	1	1	0	0	0	4	2	1	3	1	0	1	1	0	0	0	0	0	14	6	2	1	2	3	2	1	17	8	4
60230028000	1	1	18	1	7	1	1	1	11	1	3	3	7	4	3	4	2	1	1	0	1	1	0	0	0	3	4	1	1	1	0	1	0	0	0	0	0	0	12	4	3	1	1	2	4	1	16	11	5
60230029000	1	1	2	1	7	1	1	1	11	5	5	5	15	5	4	5	4	4	3	0	3	3	1	1	1	4	2	1	1	3	1	0	1	0	0	0	0	0	19	6	3	1	6	4	4	5	29	14	14
60230031010	0	1	1	1	7	1	1	1	11	5	5	5	15	4	4	3	2	1	2	0	1	2	0	0	0	4	2	1	1	1	1	1	1	0	0	0	0	1	15	5	4	1	3	4	3	2	22	11	6
60230032100	1	1	1	1	7	1	1	1	11	3	4	3	10	3	4	2	4	1	1	0	2	2	0	0	0	4	1	1	1	5	0	1	1	0	0	0	0	0	16	6	3	1	6	4	2	1	23	9	8
60230035010	0	1	2	0	4	1	1	1	7	3	4	3	10	4	3	3	1	1	1	0	1	1	0	0	0	2	1	1	1	1	0	1	0	0	0	0	0	0	8	4	2	1	1	2	2	1	13	10	4
60230037000	1	1	6	1	7	1	1	1	11	3	3	3	9	2	5	5	3	5	1	0	4	1	0	0	0	3	3	1	1	5	1	0	1	0	0	0	0	0	16	4	3	1	3	3	6	1	21	12	13
60230038000	1	1	1	1	0	1	1	0	3	3	4	3	10	4	4	2	3	3	1	0	1	1	0	0	0	5	2	1	1	1	0	0	1	0	0	0	0	0	12	4	2	1	2	3	5	1	18	10	8
60230039010	1	1	2	1	7	0	1	1	10	3	3	3	9	4	4	4	2	2	1	0	1	1	0	0	0	4	1	1	1	1	0	1	0	0	0	0	0	0	10	3	2	1	1	2	2	1	12	12	6
60230041000	0	0	8	1	2	1	1	0	5	2	3	4	9	4	2	2	2	3	2	0	1	2	0	0	0	3	2	1	4	1	0	1	1	0	0	0	0	0	15	6	2	3	2	3	2	3	21	8	8
60230042000	1	1	5	1	7	1	1	1	11	5	5	5	15	5	5	5	3	3	3	0	3	3	1	1	1	4	4	4	4	4	1	0	1	0	0	0	0	1	29	5	3	5	5	5	5	5	33	15	12
60230043000	1	1	2	0	7	1	1	1	10	3	3	3	9	3	3	3	2	1	1	0	1	2	0	0	0	5	1	1	1	1	0	0	0	0	0	0	0	0	11	4	4	6	1	4	2	1	22	9	5
60230044000	1	1	5	1	7	1	1	1	11	3	3	3	9	4	2	3	1	1	1	0	1	1	0	0	0	2	1	1	1	2	0	1	1	0	0	0	0	0	10	6	4	1	2	3	2	1	19	9	4
60230046010	1	1	10	1	2	1	0	0	4	2	3	3	8	5	2	4	2	1	1	0	1	1	0	0	0	1	1	1	1	5	0	1	1	0	0	0	0	0	12	5	2	1	1	2	1	1	13	11	5
60230047000	1	1	7	1	7	1	1	1	11	1	3	1	5	4	2	2	2	5	1	0	1	1	0	0	0	2	1	1	1	1	0	1	1	0	0	0	0	0	9	6	3	1	3	2	2	1	18	8	9
60230049000	1	1	4	1	7	1	1	1	11	3	3	3	9	3	5	5	3	2	1	0	1	1	0	0	0	3	1	1	1	1	0	1	1	0	0	0	0	0	10	5	2	1	3	4	2	1	18	13	7
60230050000	1	1	5	1	7	1	1	1	11	3	3	2	8	5	4	3	3	1	1	0	1	1	0	0	0	5	1	1	1	2	0	1	0	0	0	0	0	0	12	5	3	1	4	4	2	4	23	12	6
60230051000	1	0	18	0	7	1	1	1	10	4	4	4	12	5	3	4	3	5	3	0	1	2	0	1	0	1	1	1	1	2	0	1	1	0	0	0	0	1	12	6	3	1	3	3	3	1	20	12	12
60230052000	1	1	4	1	7	1	1	1	11	3	4	4	11	5	5	5	1	4	1	0	1	1	0	0	0	5	1	1	1	1	0	1	1	0	0	0	0	0	12	6	4	1	3	4	2	1	21	15	7
60230053010	1	1	1	1	7	1	1	1	11	4	4	4	12	3	2	3	3	5	1	0	1	1	0	1	0	3	2	1	1	1	0	1	1	0	0	0	0	1	13	2	3	2	1	3	3	1	15	8	10
60230055110	1	1	1	0	7	0	1	0	8	1	3	3	7	1	1	1	2	2	1	0	1	1	0	0	0	5	1	1	1	1	0	0	1	0	0	0	0	0	11	4	5	1	2	2	2	1	17	3	6
60230056010	1	1	7	1	7	1	1	1	11	3	3	5	11	4	2	2	1	1	1	0	1	1	0	0	0	5	1	1	1	1	1	1	1	0	0	0	1	0	14	6	4	1	1	1	1	1	15	8	4
60230057010	0	1	6	1	3	1	1	1	7	4	5	3	12	4	3	2	1	2	1	0	1	1	0	0	0	3	1	1	1	1	1	1	1	0	0	0	1	1	13	3	2	1	1	2	2	1	12	9	5
60230058000	1	1	3	1	6	1	1	0	9	3	3	3	9	3	2	2	3	2	3	1	2	2	0	0	0	3	1	1	1	2	0	1	0	0	0	0	0	1	12	3	3	1	2	2	1	2	14	7	11
60230059000	0	0	9	1	7	1	1	1	11	2	3	4	9	4	2	3	2	1	1	0	1	3	0	0	0	2	1	1	1	1	0	1	1	0	0	0	0	0	11	6	4	1	2	2	3	1	19	9	5
60230063000	1	1	20	1	1	1	0	1	4	3	3	3	9	3	3	3	3	2	1	1	3	3	1	1	1	2	1	3	4	5	0	0	1	0	0	0	0	0	22	2	3	2	2	6	6	3	24	9	10
60230064010	1	1	5	0	1	1	0	0	2	3	3	3	9	4	3	3	1	1	1	0	1	1	0	0	0	2	1	1	1	1	0	1	0	0	0	0	0	0	8	3	2	1	2	2	1	1	12	10	4
60230066000	0	1	7	0	1	0	0	0	1	4	4	4	12	2	3	2	2	2	2	1	2	2	1	1	1	2	2	2	2	2	0	0	1	0	0	0	0	0	16	1	3	6	3	3	2	3	21	7	9
60230068110	0	0	2	0	0	1	1	0	2	3	3	3	9	2	2	2	2	4	1	0	1	1	0	0	1	4	3	1	3	2	1	1	0	0	0	0	0	0	17	3	3	1	1	3	5	3	19	6	8
60230069000	1	1	4	1	6	1	0	0	8	3	3	3	9	3	1	3	2	1	1	0	2	1	0	0	1	3	1	1	1	2	0	1	1	0	0	0	0	0	12	5	3	1	4	2	1	1	17	7	6
60230004001-22810	1	1	20	1	7	1	1	1	11	4	3	3	10	3	3	3	1	1	1	0	2	1	0	0	0	2	1	1	1	1	0	0	0	0	0	0	0	0	7	4	3	1	1	3	1	1	14	9	5
60230005004-22306-22307-22308-22309	1	1	7	1	7	1	0	1	10	4	4	4	12	3	3	3	3	5	1	0	3	3	0	0	0	5	4	1	1	1	1	1	1	0	0	0	0	1	19	4	3	1	2.86829	3.7082	4	1.78253	20.359	9	12
60230006011-22810	0	1	8	1	5	1	1	1	9	1	1	3	5	5	5	5	1	1	1	0	1	1	0	0	0	1	1	1	1	1	0	0	0	0	0	0	0	0	6	2	1	2	1	2	1	2	11	15	4
60230007002-22503-22810	0	1	20	1	7	1	1	1	11	4	4	4	12	4	4	4	1	3	1	0	1	1	0	0	0	3	1	1	1	2	0	0	0	0	0	0	0	0	9	4	3	1	6	2	2	1	19	12	6
60230016001-22810	1	1	6	1	2	1	1	1	6	2	3	3	8	4	4	5	2	1	1	0	1	1	0	0	0	5	1	1	1	2	0	0	0	0	0	0	0	0	11	2	1	3	3	2	3	1	15	13	5
60230018001-10008	1	1	10	1	7	1	1	1	11	4	5	4	13	4	1	5	2	1	1	0	1	1	0	0	0	5	2	1	1	1	0	1	1	0	0	0	0	0	13	3	3	1	2	3	3	2	17	10	5
60230020001-10005	1	1	14	0	7	1	1	0	9	3	2	2	7	5	2	3	2	5	1	0	1	1	0	0	0	3	1	1	2	2	0	1	1	0	0	0	0	1	13	5	2	2	2	2	2	2	17	10	9
60230023011-22810	1	1	2	1	7	1	1	1	11	4	4	4	12	3	4	3	2	2	1	0	1	1	0	0	0	2	1	1	1	1	0	0	0	0	0	0	0	0	7	6	3	2	2	2	2	2	19	10	6
60230024012-10008-22810	1	1	8	1	7	1	1	1	11	4	4	4	12	4	1	3	1	1	1	0	1	1	0	0	0	1	1	1	1	3	0	0	0	0	0	0	0	0	8	4	3	1	3	1	1	1	14	8	4
60230027001-22810	0	1	7	1	7	1	1	1	11	3	3	2	8	4	2	1	1	1	1	0	1	1	0	0	0	3	1	1	1	1	0	0	0	0	0	0	0	0	8	5	3	1	1	2	3	1	16	7	4
60230030001-10008	1	1	11	1	6	1	0	1	9	5	5	5	15	3	1	3	3	5	2	1	3	2	1	0	1	3	5	1	4	2	1	1	1	0	0	0	0	0	22	4	3	5	4	3	3	3	25	7	14
60230033002-21301-22810	1	1	2	0	2	1	1	0	4	4	4	3	11	5	3	4	1	4	1	0	1	1	0	0	0	4	1	1	1	1	0	0	0	0	0	0	0	0	9	6	3	4	2	3	2.53629	1	21.5363	12	7
60230034002-21605-22810	1	1	6	1	7	1	0	1	10	4	4	4	12	5	4	3	2	1	1	0	1	1	0	0	0	3	2	1	1	1	0	0	0	0	0	0	0	0	9	4	3	1	2	1	2	1	14	12	5
60230036012-10005-22810	0	1	3	1	4	1	1	1	8	2	2	3	7	4	2	3	1	1	1	0	1	1	0	0	0	2	1	1	1	1	0	0	0	0	0	0	0	0	7	3	2	1	1	2	4	1	14	9	4
60230040011-22810	0	1	1	0	1	1	1	0	3	2	2	2	6	1	3	4	1	1	1	0	1	1	0	0	0	2	2	1	1	1	0	0	0	0	0	0	0	0	8	6	4	1	1	1	1	1	15	8	4
60230045002-20205-22810	1	1	5	1	0	1	0	0	2	5	5	5	15	5	3	5	1	1	1	0	5	1	0	0	1	1	1	1	5	1	0	0	0	0	0	0	0	0	11	6	4	3	3	2	1	1	20	13	8
60230048002-20203-20205	0	0	6	1	3	0	1	0	5	4	4	4	12	5	5	2	1	1	1	0	1	1	0	0	0	1	1	1	1	1	0	1	0	0	0	0	0	0	7	2	1	1	1	1	1	1	8	12	4
60230054012-10002-10003	1	#NULL!	1	1	0	1	0	0	2	3	4	4	11	3	1	3	2	4	3	1	1	3	0	0	0	3	3	1	1	1	1	1	1	0	0	0	0	1	16	4	3	1	3	3	4	2	20	7	11
60230060001-20101	1	1	7	1	3	0	1	0	5	3	3	3	9	4	3	3	2	4	2	1	2	2	0	0	1	5	3	1	2	2	0	0	1	0	0	0	0	0	17	3	2	2	2	3	2	2	16	10	11
60230061103-20202-20204-20205	1	0	2	1	0	0	0	0	1	4	4	3	11	3	3	3	3	4	1	0	1	1	0	0	1	5	3	1	1	1	1	0	1	0	0	0	0	0	15	6	2	4	2	3	2	2	21	9	9
60230062003-10009-21606-22810	0	1	#NULL!	1	7	1	0	1	10	3	2	2	7	4	3	3	2	1	1	0	1	2	0	0	1	2	4	1	1	1	0	0	0	0	0	0	0	0	12	6	2	1	2	2	4	1	18	10	5
60230065001-21606	0	0	6	1	2	1	1	1	6	3	3	3	9	4	3	5	2	3	4	1	3	3	1	1	0	3	4	3	4	3	0	1	0	0	0	0	0	1	24	2	3	2	2	2	2	2	15	12	13
60230067011-22810	0	1	4	1	2	0	1	0	4	3	3	2	8	4	1	4	3	3	1	0	1	2	0	0	0	5	3	1	1	1	0	0	0	0	0	0	0	0	13	3	2	1	1	3	1	1	12	9	8
60240007010	0	1	20	0	5	1	1	1	8	3	3	2	8	3	5	5	2	2	3	0	3	2	0	0	0	2	1	3	2	2	1	1	0	0	0	0	0	0	14	5	2	1	1	2	5	1	17	13	10
60240010000	1	1	2	1	2	1	0	0	4	3	4	4	11	5	5	3	3	4	3	0	3	3	1	0	0	3	3	1	1	3	0	1	1	0	0	0	0	1	18	2	3	2	5	3	3	2	20	13	13
60240011000	0	1	1	1	1	0	1	1	4	2	3	3	8	2	3	2	3	4	4	1	5	3	1	1	1	3	3	4	2	2	1	1	1	0	0	0	1	1	25	6	3	6	2	2	3	1	23	7	17
60240015000	0	1	10	1	5	1	1	0	8	3	3	3	9	4	5	4	2	3	3	1	1	2	0	0	0	1	1	1	1	1	0	1	1	0	0	0	0	0	9	6	3	5	1	3	1	5	24	13	10
60240023010	0	1	7	1	4	1	1	0	7	5	5	5	15	5	5	5	1	1	1	0	1	1	0	0	0	1	1	1	1	1	1	1	1	1	1	0	1	1	13	1	1	1	1	1	1	1	7	15	4
60240025000	1	1	1	1	4	1	1	0	7	5	5	5	15	1	1	5	3	4	2	1	3	2	1	0	1	3	1	2	3	3	0	0	1	1	0	1	0	1	20	5	4	5	5	5	2	1	27	7	13
60240027010	1	1	8	1	2	1	1	0	5	2	3	1	6	2	3	1	1	5	1	0	1	1	0	0	0	2	5	1	1	1	0	1	1	0	0	1	0	1	15	4	4	3	2	2	4	1	20	6	8
60240032000	1	1	20	1	6	1	1	1	10	4	4	4	12	5	3	3	1	3	1	0	1	1	0	0	0	4	1	1	1	1	0	1	1	0	0	0	0	0	11	5	2	2	2	2	1	2	16	11	6
60240038000	0	1	1	0	2	0	1	0	3	1	3	4	8	4	1	1	1	1	1	0	1	1	0	0	0	3	2	1	1	1	0	1	0	0	0	1	0	1	12	2	2	2	5	2	2	5	20	6	4
60240039000	1	1	8	1	1	1	1	0	4	4	3	3	10	4	1	3	2	3	1	0	1	1	0	0	0	3	1	1	1	1	0	0	0	0	0	0	0	0	8	3	3	1	1	2	3	1	14	8	7
60240041000	1	1	20	0	1	1	0	0	2	3	3	2	8	3	3	3	2	2	2	0	1	1	0	0	0	2	2	2	2	3	0	1	1	0	0	0	0	1	15	5	4	5	2	2	2	2	22	9	7
60240045000	1	1	20	1	6	1	1	0	9	3	3	3	9	3	1	3	1	4	1	0	1	1	0	0	0	4	4	1	1	1	0	1	1	0	0	1	0	1	16	6	5	2	5	2	3	1	24	7	7
60240046010	1	1	5	1	7	1	1	0	10	2	3	1	6	3	4	1	1	1	1	0	1	1	0	0	0	1	1	1	1	1	0	0	1	0	0	0	0	0	7	4	2	2	2	2	4	1	17	8	4
60240047000	1	1	1	1	1	1	1	1	5	3	3	3	9	1	1	1	2	1	1	0	1	4	0	0	0	3	1	1	2	2	0	1	1	1	0	0	0	0	16	5	3	6	2	2	5	2	25	3	5
60240051000	1	1	10	1	7	1	1	1	11	3	3	2	8	2	1	1	2	2	1	0	1	1	0	0	0	2	3	1	1	1	0	0	1	0	0	0	0	1	11	5	3	5	5	1	4	5	28	4	6
60240052000	1	1	11	1	6	1	0	0	8	3	4	3	10	4	1	3	4	3	3	0	3	3	0	0	0	4	3	2	2	1	0	1	1	1	0	0	0	1	19	5	4	5	5	5	5	5	34	8	13
60240053010	1	1	5	1	4	1	1	0	7	2	3	1	6	2	3	1	2	2	1	0	1	1	0	0	0	1	1	1	1	1	0	0	0	0	0	0	0	0	6	3	2	1	1	2	2	1	12	6	6
60240055000	1	1	3	1	0	1	1	1	4	2	3	2	7	2	1	2	2	3	1	0	1	1	0	0	0	2	2	1	2	1	0	1	1	1	0	0	0	0	12	4	4	2	4	1	2	1	18	5	7
60240001001-20101	0	1	7	0	7	1	1	1	10	4	4	3	11	3	4	4	3	2	1	0	2	1	0	0	0	2	2	1	2	3	0	1	0	0	0	0	0	1	13	3	2	1	2	2	5	2	17	11	8
60240002001-22505	0	1	5	1	7	1	1	1	11	3	4	4	11	4	3	4	2	3	2	0	1	2	0	0	0	2	1	1	1	1	1	0	1	0	0	0	0	1	11	5	3	6	4	3	6	3	30	11	8
60240003001-22503	1	1	6	0	6	0	0	0	6	2	2	3	7	3	1	1	2	2	1	0	3	1	0	0	0	3	1	1	1	1	0	1	1	0	0	1	0	0	11	6	1	4	1	1	3	1	17	5	8
60240004012-10008-10011	0	1	9	1	6	1	1	1	10	3	3	3	9	5	5	5	3	5	3	0	1	2	1	0	0	2	1	1	1	1	0	1	0	1	0	0	1	0	12	6	4	1	5	1	3	1	21	15	12
60240005001-22503	0	1	1	1	6	1	1	0	9	2	4	3	9	3	4	3	1	4	1	0	5	1	0	0	0	3	1	1	1	1	0	1	0	0	0	0	0	1	10	5	3	2	3	2	5	1	21	10	11
60240006002-21408-21409	0	1	6	1	5	1	1	1	9	2	2	3	7	1	1	1	3	3	1	0	1	3	0	0	0	4	2	1	1	2	0	1	1	0	0	0	0	1	16	4	3	2	3	2	2	3	19	3	8
60240008002-20904-22503	0	1	1	1	0	1	1	1	4	3	3	2	8	4	5	5	3	5	2	1	5	3	0	0	0	5	5	1	1	1	0	1	1	0	0	1	0	1	20	6	5	6	6	6	6	6	41	14	16
60240009001-21202	1	1	13	1	4	1	1	0	7	3	3	2	8	4	2	3	4	5	4	0	3	4	0	0	1	4	2	2	2	2	0	1	0	0	0	0	0	0	18	1	5	5	5	4	5	5	30	9	16
60240012001-22503	0	0	6	0	1	0	1	0	2	4	2	4	10	4	3	5	4	3	3	1	4	4	0	0	0	3	2	1	1	3	0	1	0	0	0	1	0	1	17	5	2	5	3	3	5	5	28	12	15
60240013001-22702	0	1	4	1	7	1	1	0	10	2	3	3	8	4	4	4	2	3	1	0	2	2	0	1	0	4	2	1	2	1	1	1	0	0	0	0	0	1	16	5	2	4	3	3	5	3	25	12	8
60240014002-21101-21102	1	0	1	1	1	1	1	0	4	5	5	5	15	5	5	5	3	3	2	0	1	1	0	0	0	3	1	1	1	1	0	1	0	0	0	0	0	1	10	6	4	1	3	3	2	1	20	15	9
60240016001-22503	1	1	2	1	5	1	1	1	9	1	3	1	5	2	1	3	1	3	1	0	1	2	0	0	0	3	1	1	1	1	0	1	1	0	0	0	0	0	11	6	2	3	2	2	4	1	20	6	6
60240017001-22503	1	1	6	1	4	1	1	1	8	3	4	2	9	4	5	3	2	3	2	0	2	2	0	0	0	4	1	1	2	2	0	1	0	1	0	0	0	1	15	6	3	5	4	3	4	3	28	12	9
60240018002-20805-22503	1	1	1	1	3	1	1	0	6	5	5	5	15	3	3	2	5	5	5	0	5	1	0	1	1	5	5	1	1	1	1	1	1	1	1	1	1	1	24	1	5	3	2	2	3	1	17	8	20
60240019001-10009	1	1	#NULL!	0	4	1	1	0	6	1	1	1	3	3	4	2	2	5	1	0	1	1	0	0	0	3	1	1	3	3	0	1	1	0	0	0	0	0	14	4	5	4	1	2	2	1	19	9	9
60240020001-20101	0	1	3	0	0	0	1	1	2	1	3	4	8	3	3	4	4	3	4	1	3	3	1	1	0	2	3	2	3	5	1	1	1	1	0	1	0	1	26	2	3	5	3	2	2	2	19	10	15
60240021011-22503	1	1	5	1	2	1	0	0	4	3	3	2	8	4	1	4	3	5	2	0	1	2	0	1	1	1	1	1	1	1	1	1	1	0	0	0	0	0	12	5	2	3	1	2	3	1	17	9	11
60240022004-10009-10011-20101-22506	0	1	#NULL!	0	1	0	0	0	1	1	1	1	3	1	1	1	1	1	1	0	1	1	0	0	0	1	1	1	1	1	0	0	0	0	0	0	0	0	6	3	1	1	1	1	1	1	9	3	4
60240024001-22704	1	1	7	1	4	1	1	0	7	5	5	5	15	1	1	5	3	2	4	0.614371	3	3	1	1	1	3	2	3	3	3	1	1	1	1	1	0	1	1	27	2	3	2	2	2	2	2	15	7	12.6144
60240026012-10005-20205	1	0	#NULL!	1	2	1	1	#NULL!	#NULL!	3	3	3	9	4	2	2	1	3	1	0	1	2	0	0	0	2	2	1	1	2	1	1	0	0	0	0	0	1	13	6	3	6	6	2	6	2	31	8	6
60240028011-22503	1	1	10	1	1	1	1	0	4	2	2	2	6	3	3	3	1	5	1	0	1	1	0	0	0	3	2	1	1	1	0	0	1	0	0	0	0	1	11	4	2	1	1	2	2	1	13	9	8
60240029011-22503	1	1	16	1	5	1	1	0	8	1	1	1	3	4	1	1	1	5	1	0	1	1	0	0	0	3	2	1	1	1	0	0	1	0	0	0	0	1	11	4	2	1	1	2	1	1	12	6	8
60240030112-21604-22503	0	0	20	0	1	1	1	0	3	1	2	1	4	3	3	3	5	5	5	0	5	5	1	1	1	3	3	3	3	3	1	1	1	1	1	1	1	0	30	6	5	6	5.35013	2	6	6	36.3501	9	20
60240031013-10003-22102-22503	1	1	#NULL!	1	3	1	1	0	6	4	4	3	11	4	4	3	2	1	1	0	2	3	0	0	0	2	2	2	2	2	0	1	1	1	0	0	1	1	18	4	2	3.33381	3	2	3	4	21.3338	11	6
60240033013-22302-22503-22704	1	1	4	1	0	1	1	0	3	3	2	3	8	3	3	3	4	5	5	0.65545	4	1	0	0	0	5	1	5	2	5	0	1	1	0	0	0	0	0	21	2	3	2	3	3	3	2	18	9	18.6555
60240034001-22005	1	1	6	1	6	1	1	1	10	3	5	3	11	3	4	3	4	5	3	1	3	4	1	1	1	4	4	3	3	2	1	1	1	0	0	1	1	1	29	6	4	3	3	3	6	3	28	10	16
60240035001-22503	1	1	11	1	2	1	1	0	5	1	3	3	7	5	4	3	3	2	2	0	3	2	0	0	0	3	3	1	2	2	0	1	1	0	0	0	0	1	16	5	2	2	2	2	2	2	17	12	10
60240036107-10008-10009-10010-10011-22304-22601-22806	1	1	#NULL!	0	2	1	0	0	3	1	3	4	8	4	1	1	1	1	1	0	1	1	0	0	0	3	1.39447	2	1	1	0	1	1	0	0	1	0	1	13.3945	2	2.20894	2	5	5	2	5	23.2089	6	4
60240037001-22503	1	1	14	1	2	1	0	0	4	3	2	2	7	4	3	2	3	3	3	0	2	2	1	0	0	2	3	1	2	1	1	1	1	0	0	0	0	0	15	5	3	3	6	5	5	2	29	9	11
60240040001-22503	1	1	6	1	5	1	1	1	9	2	3	1	6	3	1	2	1	1	1	0	1	1	0	0	0	2	4	1	1	1	0	0	0	0	0	0	0	0	10	4	2	5	2	2	1	1	17	6	4
60240042001-22704	1	1	2	1	2	1	1	1	6	3	3	3	9	5	3	5	3	3	3	0.252162	3	2	0	0	0	3	2	1	1	1	0	1	0	0	0	0	0	0	11	2	4	3	2	2	2	2	17	13	12.2522
60240043001-22503	1	1	12	1	#NULL!	1	1	#NULL!	#NULL!	2	2	2	6	2	2	2	2	4	3	1	5	3	1	0	1	4	4	1	4	5	0	0	1	0	1	0	0	1	26	2	3	4	6	3	3	3	24	6	15
60240044003-10003-10004-22503	1	1	20	1	0	1	1	0	3	2	2	2	6	2	5	4	1	3	1	0	1	1	0	0	0	3	3	1	1	1	0	0	0	0	0	0	0	1	11	2	2	1	2	2	3	1	13	11	6
60240048004-10008-10009-10010-10011	1	1	#NULL!	0	#NULL!	1	#NULL!	#NULL!	#NULL!	1	1	1	3	5	5	3.92193	3	3	3	1	2	3	1	1	0	2	2	1	2	1	0	1	0	0	0	0	0	1	15	4	3	5	5	5	3	5	30	13.9219	12
60240049102-21701-21702	0	1	1	1	3	1	1	0	6	4	5	5	14	5	5	5	5	5	5	0	5	5	1	0	0	2	2	2	2	2	0	0	1	0	0	0	0	0	17	3	4	5	5	5	3	5	30	15	20
60240050002-21202-22503	0	0	1	1	3	1	1	1	7	3	4	3	10	4	3	4	1	2	2	0	1	2	0	0	0	2	1	1	1	2	1	1	0	0	0	0	0	1	12	6	3	2	2	4	1	3	21	11	6
60240051011-22503	1	1	2	0	6	1	1	1	9	3	4	3	10	3	1	3	2	2	2	0	2	2	0	0	0	3	1	1	1	1	0	1	1	0	0	0	0	1	12	5	3	1	5	1	2	1	18	7	8
60250004000	1	0	14	1	0	1	1	0	3	3	4	3	10	4	2	3	2	4	2	0	3	2	0	0	0	5	4	1	2	4	0	0	1	0	0	0	0	0	19	5	3	2	3	5	3	1	22	9	11
60250008000	0	0	2	1	0	1	0	0	2	2	3	3	8	2	4	5	2	2	2	0	2	1	0	0	1	3	2	1	1	1	0	0	0	0	0	0	0	1	11	2	2	2	2	2	3	2	15	11	8
60250010010	1	0	3	0	2	1	1	1	5	1	4	3	8	1	3	1	1	1	1	0	1	1	0	0	0	1	1	1	1	1	0	0	0	0	0	0	0	0	6	4	2	1	1	1	1	1	11	5	4
60250014000	0	0	7	1	5	1	1	1	9	4	3	3	10	4	3	3	1	1	1	0	1	3	0	0	0	2	5	1	1	1	0	0	0	0	0	0	0	0	13	6	3	2	3	3	2	1	20	10	4
60250015010	1	0	3	0	3	1	1	1	6	1	1	2	4	2	2	2	1	1	1	0	1	1	0	0	0	1	1	1	1	1	0	0	0	0	0	0	0	0	6	2	3	1	1	1	1	1	10	6	4
60250016010	0	0	5	1	6	1	1	0	9	3	4	3	10	4	2	2	1	1	1	0	1	1	0	0	0	1	1	1	1	1	0	0	0	0	0	0	0	0	6	5	3	1	6	1	1	1	18	8	4
60250017000	1	0	12	1	0	1	1	0	3	3	3	3	9	4	3	4	1	3	1	0	1	1	0	1	0	5	1	1	1	2	0	0	0	0	0	0	0	0	12	6	4	3	5	5	6	1	30	11	6
60250019000	0	0	2	1	0	1	1	0	3	4	5	3	12	5	3	4	1	3	1	0	1	1	0	0	0	1	1	1	1	1	1	1	0	0	0	0	0	0	8	5	3	1	1	3	3	1	17	12	6
60250021000	0	1	3	0	6	1	1	0	8	3	3	3	9	4	4	4	2	1	1	0	1	1	0	0	0	1	1	1	1	1	0	1	0	0	0	0	0	0	7	5	3	2	2	2	1	1	16	12	5
60250022000	0	0	10	0	0	0	1	0	1	3	4	3	10	3	3	3	2	2	3	0	1	2	0	0	0	5	1	1	1	3	0	1	1	0	0	0	0	1	16	3	3	6	2	3	6	6	29	9	8
60250034000	1	1	8	1	0	1	0	0	2	3	3	3	9	1	1	2	2	2	1	0	1	1	0	0.228298	0.275413	2.03924	1	1	1	2	0	0	0	0	0	0	0	0	8.54295	3	3	2	2	2	2	1	15	4	6
60250037000	0	0	15	1	5	1	1	0	8	3	2	2	7	2	3	2	2	3	3	0	3	2	0	0	0	3	3	3	2	3	0	1	0	0	0	1	0	1	19	3	4	6	3	3	6	3	28	7	11
60250040010	1	1	2	1	3	1	1	1	7	3	3	3	9	2	3	3	1	1	1	0	1	1	0	0	0	1	1	1	1	1	0	1	0	0	0	0	0	1	8	2	3	1	2	2	2	1	13	8	4
60250041010	0	0	2	0	2	0	0	0	2	1	1	1	3	5	5	5	1	1	1	0	1	1	0	0	0	5	5	5	5	5	0	0	1	0	0	0	0	0	27	6	3	3	1	5	6	3	27	15	4
60250043000	1	0	6	1	0	0	0	0	1	2	3	2	7	4	2	4	3	3	2	0	2	1	0	0	0	3	4	1	2	3	0	1	1	0	0	0	0	1	17	4	3	3	2	2	2	2	18	10	10
60250044000	0	0	10	1	7	1	1	0	10	4	4	3	11	5	1	3	2	1	1	0	1	3	0	0	0	1	1	1	1	5	0	1	0	0	0	0	1	0	14	6	3	1	3	2	4	1	20	9	5
60250045010	0	1	5	1	7	1	1	1	11	3	3	3	9	4	3	3	2	3	1	0	1	1	0	0	1	1	1	1	1	1	0	1	0	0	0	0	0	0	8	6	4	1	6	1	6	1	25	10	7
60250047110	1	0	1	1	5	0	1	0	7	4	4	4	12	4	4	4	4	5	2	1	2	1	0	1	0	3	1	1	1	1	0	1	1	0	0	0	0	0	11	2	2	1	3	3	1	1	13	12	14
60250049000	0	0	11	1	1	0	0	0	2	3	1	1	5	1	1	1	4	3	2	1	3	3	1	1	1	5	3	1	1	3	0	0	1	0	0	0	0	0	20	5	3	3	5	2	4	3	25	3	13
60250050010	0	0	3	1	1	1	1	0	4	4	4	4	12	4	4	4	1	1	1	0	1	1	0	0	1	4	1	5	4	1	0	0	0	0	0	0	0	0	17	2	4	3	5	2	3	1	20	12	4
60250001012-22503-22704	1	0	5	1	4	1	0	1	7	1	1	1	3	3	3	3	3	3	3	0.363851	3	2	0	0	0	5	5	1	1	1	0	1	1	0	0	0	0	0	17	2	2	1	1	1	2	1	10	9	12.3639
60250002001-22503	1	0	1	1	2	0	1	1	5	3	3	3	9	3	3	3	3	3	3	0	1	2	0	0	0	4	2	1	1	1	0	1	0	0	0	0	0	1	13	4	3	3	4	3	2	2	21	9	10
60250003001-10007	0	0	6	1	0	0	1	0	2	3	2	3	8	1	2	2	2	2	1	0	2	3	0	0	1	3	2	1	1	2	0	1	0	0	0	0	0	1	15	4	3	4	1	3	1	1	17	5	7
60250005011-22503	0	0	11	1	0	1	0	0	2	2	2	1	5	5	1	1	1	1	1	1	2	2	1	1	0	4	1	1	1	1	0	1	1	1	0	0	0	0	15	6	2	1	4	4	4	1	22	7	6
60250006005-20501-20502-20503-22803-22804	1	1	6	1	0	1	0	1	3	2	2	2	6	3	3	3	2	2	1	0	1	2	0	0.120444	0.176911	3	1	1	1	1	0	1	0	0	0	0	0	0	10.2974	3	2	2	2	3	3	1	16	9	6
60250007002-21104-21501	1	1	10	1	0	0	1	0	2	2	2	3	7	3	4	2	3	2	3	0	1	3	0	0	1	2	4	1	1	3	0	1	1	0	0	0	0	1	18	2	3	5	2	3	2	3	20	9	9
60250009001-22503	1	0	2	1	0	1	1	0	3	2	2	1	5	3	4	3	2	3	4	1	3	2	1	1	0	5	5	1	1	2	0	1	0	0	0	0	1	0	20	4	2	2	3	3	2	2	18	10	13
60250011011-10003	1	1	9	0	1	1	0	0	2	3	3	3	9	2	3	3	1	1	1	0	1	1	0	0	0	1	1	1	1	1	0	0	1	0	0	0	0	0	7	2	1	1	1	1	5	1	12	8	4
60250012111-21606	0	0	1	1	1	1	1	0	4	3	3	3	9	4	2	2	2	1	1	0	1	1	0	0	0	2	1	1	1	1	0	1	0	0	0	0	0	1	9	5	2	1	4	4	1	1	18	8	5
60250013003-10009-22309-22503	1	0	#NULL!	1	0	1	1	0	3	3	5	4	12	4	1	1	1	1	1	0	1	1	0	0	0	5	1	1	1	1	0	1	1	0	0	0	0	1	13	6	4	4	3	3	2	2	24	6	4
60250018001-20402	0	0	11	1	2	0	1	0	4	3	3	3	9	4	3	4	3	4	1	1	1	2	0	0	1	5	2	1	1	3	0	1	0	0	0	0	0	1	17	6	3	1	1	3	4	1	19	11	10
60250020012-10007-10009	1	0	#NULL!	1	2	0	0	0	3	4	3	2	9	4	4	4	2	1	1	0	1	1	0	1	1	3	2	1	1	1	0	0	0	0	0	0	0	0	11	4	2	2	1	2	3	1	15	12	5
60250023011-22503	0	0	8	1	4	0	0	0	5	3	2	4	9	4	1	4	2	3	3	0	1	1	0	0	0	3	1	1	1	1	0	1	1	0	0	0	0	0	10	4	3	2	1	2	5	1	18	9	9
60250024006-21804-21805-21806-22803-22804-22805	1	1	7	1	0	1	0	0	2	3	4	3	10	3	2	2	2	1	1	0	1	1	0	0.225835	0.282902	2.75441	1	1	1	2	0	0	1	0	0	0	0	0	10.2631	2	3	1	1	3	3	1	14	7	5
60250025003-22803-22804-22805	1	1	3	1	0	1	0	0	2	2	2	2	6	3	3	3	1	2	1	0	1	1	0	0.0350819	0.297669	2.43182	1	1	1	2	0	1	0	0	0	0	0	0	9.76457	2	3	1	2	3	3	1	15	9	5
60250026003-22803-22804-22805	1	0	6	1	1	1	0	1	4	3	3	3	9	3	3	3	1	1	1	0	1	1	0	0.118768	0.23234	1.89773	1	1	1	1	0	0	0	0	0	0	0	0	7.24884	2	2	1	2	2	3	1	13	9	4
60250027006-21606-22403-22705-22803-22804-22805	1	1	4	1	0	1	1	1	4	3	3	3	9	3	3	3	1	2	1	0	1.04141	1	0	0.227966	0.167769	2.1742	1	1	1	3	0	1	1	0	0	0	0	0	11.5699	2	2	1	2	2	2	1	12	9	5.04141
60250028004-21501-22803-22804-22805	0	0	6	1	0	0	0	1	2	3	3	3	9	1	1	1	2	2	1	0	1	1	0	0.191584	0.209154	2.04793	1	1	1	1	0	0	0	0	0	0	0	0	7.44867	2	2	1	2	2	3	1	13	3	6
60250029007-22201-22701-22704-22705-22803-22804-22805	1	0	3	1	0	1	1	0	3	3	3	3	9	3	1	2	1.78979	2	1	0.0364785	0.794533	1	0	0.277985	0.283366	2.09257	1	1	1	1	0	0	0	0	0	0	0	0	7.65392	2	2	2	2	2	3	1	14	6	5.6208
60250030004-10002-22803-22804-22805	1	#NULL!	4	1	1	1	0	1	4	4	4	4	12	3	2	2	2	2	1	1	1	1	0	0.279544	0.22273	1.78854	1	1	1	2	0	0	0	0	0	0	0	0	8.29081	2	2	2	1	2	3	1	13	7	7
60250031004-22204-22803-22804-22805	1	1	5	1	0	1	1	0	3	2	3	2	7	2	1	1	2	2	2	1	1	1	0	0.271696	0.409381	2.92344	1	1	1	4	0	0	1	0	0	0	0	0	12.6045	2	3	4	2	3	3	1	18	4	8
60250032005-10002-21501-21502-22402-22704	0	#NULL!	1	1	6	1	1	1	10	5	5	5	15	4	4	4	5	5	5	1.03231	4	5	1	0	0	2	5	5	5	5	0	1	1	1	1	0	1	1	34	3	4	6	6	5	3	3	30	12	20.0323
60250033001-10007	0	1	15	1	4	1	1	0	7	2	3	3	8	4	1	5	2	1	1	1	3	1	0	0	0	4	1	1	1	1	0	0	0	0	0	0	0	0	9	5	3	1	2	1	5	1	18	10	8
60250035004-22102-22803-22804-22805	1	1	6	1	0	1	0	0	2	3	3	3	9	3	3	2	3	2	1	0	1	1	0	0.265201	0.219035	2.09965	1	1	1	1	0	1	0	0	0	0	0	0	8.58388	2	2	2	2	2	3	2	15	8	7
60250036003-22803-22804-22805	1	0	6	0	0	1	0	0	1	3	3	3	9	2	1	2	4	3	1	1	1	2	0	0.326623	0.301705	2.97661	1	1	1	3	0	0	1	0	0	0	0	1	13.6049	2	4	3	2	3	3	1	18	5	10
60250038001-20805	1	1	14	1	2	1	0	1	5	5	3	5	13	3	2	3	5	1	1	0	1	3	0	0	0	1	1	1	1	1	0	0	1	1	0	0	0	0	10	3	1	1	3	6	5	3	22	8	8
60250039001-22704	0	1	10	1	5	1	1	0	8	3	1	3	7	2	1	1	2	3	2	0.454042	4	2	1	0	1	1	2	2	2	2	0	0	1	0	0	0	0	0	14	2	4	3	3	2	2	2	18	4	11.454
60250042001-10007	1	1	7	1	1	1	0	0	3	5	5	5	15	4	2	2	3	2	1	0	2	1	0	0	1	4	1	1	2	4	0	1	1	0	0	0	1	0	17	5	4	5	3	3	5	2	27	8	8
60250046011-22503	0	1	7	1	7	1	1	0	10	3	3	3	9	4	2	2	1	2	1	0	2	3	0	0	0	1	1	1	1	2	0	1	1	0	0	0	0	1	12	6	3	2	5	5	5	6	32	8	6
60250048001-21406	1	1	5	1	0	1	1	1	4	2	3	3	8	3	1	2	3	2	1	1	2	3	1	1	1	5	2	1	3	4	0	1	0	0	0	0	0	0	22	5	3	4	3	5	4	2	26	6	9
60250051001-10002	0	#NULL!	4	1	1	1	0	0	3	3	3	3	9	4	1	1	2	2	1	0	1	1	0	0	1	3	2	1	1	2	0	1	0	0	0	0	0	0	12	2	4	1	2	3	4	2	18	6	6
60250052007-20501-20502-20503-21806-22703-22803-22804	0	1	8	1	0	1	0	0	2	3	3	3	9	3	2	2	2	1	1.24293	0	1	1	0	0.146458	0.248139	3	1	1	1	1	0	1	0	0	0	0	0	0	9.3946	2	3	1	2	2	3	1	14	7	5.24293
60250053003-10002-22803-22804	1	#NULL!	5	1	0	0	0	0	1	3	2	2	7	2	1	1	2	1	1	0	1	1	0	0.168815	0.356896	3	1	1	1	1	0	0	1	0	0	0	0	0	9.52571	2	3	2	1	2	2	1	13	4	5
60250054003-22803-22804-22805	1	1	6	1	0	1	0	0	2	4	2	2	8	2	2	2	2	1	1	0	1	1	0	0.149765	0.267002	1.7542	1	1	1	1	0	1	0	0	0	0	0	0	8.17097	2	3	2	1	2	3	1	14	6	5
60250055006-20501-20502-20503-22803-22804-22805	1	0	6	1	0	1	0	0	2	4	3	2	9	3	2	3	3	1	1	0	1	1	0	0.190447	0.275001	2.51773	1	1	1	2	0	0	0	0	0	0	0	0	8.98318	2	3	2	2	3	2	1	15	8	6
60250056009-20601-20602-20603-20604-20605-21202-22803-22804-22805	1	0	3	1	1	1	1	0	4	2	2	2	6	2	2	2	2	1	1	0	1	1	0	0.152292	0.261368	2.76638	2	1	1	3	0	0	1	0	0	0	0	0	12.18	2	3	2	1	3	2	1	14	6	5
60250057005-21301-22703-22803-22804-22805	0	0	6	1	0	1	1	0	3	3	2	2	7	4	3	3	2	2	1.34991	0	1	1	0	0.195562	0.170293	2.62397	1	1	1	2	0	1	1	0	0	0	0	0	10.9898	3	3	2	2	3	2.81914	1	16.8191	10	6.34991
60250058004-22306-22803-22804-22805	1	1	3	1	0	1	1	0	3	4	4	3	11	3	1	2	3	1	1	0	1	1	0	0.280152	0.226777	2.21474	1	1	1	2	0	1	0	0	0	0	0	0	9.72166	2	2	2	2.33392	2	2	1	13.3339	6	6
60260001000	1	1	2	1	2	1	1	1	6	1	1	1	3	1	1	2	1	1	1	0	1	1	0	0	0	2	1	1	1	1	0	1	0	0	0	0	0	0	8	2	2	2	1	2	1	1	11	4	4
60260003010	1	0	14	1	4	1	1	1	8	2	2	3	7	4	2	3	1	1	1	0	1	1	0	0	0	3	1	1	1	1	0	1	1	0	0	0	0	0	10	5	2	2	2	2	2	1	16	9	4
60260005000	1	1	4	0	1	0	1	0	2	3	3	3	9	4	4	4	1	3	1	0	1	1	0	0	0	1	1	1	1	1	0	1	0	0	0	0	0	0	7	3	1	1	3	1	2	1	12	12	6
60260006000	1	1	13	1	0	1	1	1	4	3	3	3	9	3	3	2	2	5	1	0	1	1	0	0	0	5	1	1	1	1	1	0	1	0	0	0	0	0	12	4	3	2	3	4	4	1	21	8	9
60260008000	1	1	6	0	1	1	1	0	3	3	3	3	9	4	2	3	2	1	1	0	1	1	0	0	0	4	1	1	2	1	0	0	1	0	0	0	0	1	12	4	3	1	2	2	3	2	17	9	5
60260010000	1	1	4	1	6	1	1	1	10	3	3	2	8	4	4	4	1	5	1	0	4	1	0	0	1	3	1	1	1	1	0	1	1	0	0	0	0	1	12	6	3	1	3	2	1	1	17	12	11
60260011000	1	1	3	0	1	1	1	1	4	3	3	3	9	4	4	4	3	3	1	0	1	1	0	0	0	3	1	1	1	1	0	0	1	0	0	0	0	0	9	4	4	2	2	2	2	2	18	12	8
60260012000	1	1	2	1	7	1	0	0	9	2	4	2	8	4	2	2	4	2	2	1	3	2	0	1	0	1	1	3	4	4	0	1	1	0	0	0	0	1	19	6	3	3	2	3	1	2	20	8	12
60260013000	1	1	4	1	3	0	0	0	4	2	3	2	7	3	2	3	3	2	1	0	3	1	0	0	1	2	2	1	2	2	1	0	0	0	0	0	0	1	13	6	3	3	3	2	2	1	20	8	9
60260014000	1	1	9	1	0	1	1	1	4	1	2	1	4	1	1	1	1	1	1	0	1	1	0	0	0	1	1	1	1	1	0	1	1	0	0	0	0	1	9	4	3	2	3	3	2	1	18	3	4
60260015000	1	1	2	0	7	1	1	1	10	3	3	3	9	4	2	1	2	5	1	0	1	1	0	0	0	1	1	1	1	5	0	1	1	0	0	0	0	1	13	6	3	1	2	1	2	1	16	7	9
60260016000	1	1	2	1	7	0	1	1	10	3	3	3	9	4	3	2	3	3	2	0	1	1	0	0	1	2	2	1	1	1	0	1	0	0	1	0	1	1	13	2	3	1	2	1	3	1	13	9	9
60260017000	1	1	4	0	0	1	1	1	3	1	3	1	5	3	1	4	1	1	1	0	1	1	0	0	1	2	1	1	1	1	0	0	0	0	0	0	0	0	8	5	2	3	4	1	2	1	18	8	4
60260018000	1	1	5	1	2	1	1	0	5	2	2	3	7	5	2	3	2	1	1	0	1	2	0	1	1	3	3	1	1	1	0	0	0	0	0	0	0	1	14	6	4	3	3	5	6	2	29	10	5
60260019000	0	1	4	1	5	1	1	1	9	2	3	3	8	3	3	3	2	4	2	1	2	2	1	0	0	4	3	1	1	2	0	0	0	0	0	0	0	0	14	6	5	2	2	4	3	2	24	9	11
60260020000	0	1	4	1	5	1	1	1	9	2	3	3	8	4	2	3	4	3	2	0	1	2	0	1	0	1	3	1	2	3	0	1	1	0	0	0	0	0	15	6	2	2	2	2	2	1	17	9	10
60260021000	1	1	3	1	0	1	1	1	4	3	3	3	9	4	2	4	3	2	1	0	1	1	0	0	0	1	2	1	1	1	0	0	0	0	0	0	0	0	7	3	2	1	1	3	3	3	16	10	7
60260022000	0	1	1	1	2	1	1	1	6	3	5	3	11	5	4	4	3	1	1	0	1	2	0	0	0	5	1	1	1	1	0	1	0	0	0	0	0	0	12	6	3	5	4	5	6	5	34	13	6
60260023000	0	0	2	1	2	1	1	1	6	3	5	3	11	3	1	3	3	1	1	0	1	1	0	0	0	4	2	1	1	1	1	1	0	0	0	0	0	0	12	3	2	1	3	2	4	1	16	7	6
60260024000	0	1	6	1	4	0	1	0	6	3	3	3	9	4	1	1	3	3	3	0	2	3	1	0	0	2	3	1	3	3	1	1	0	0	0	0	0	0	18	6	4	2	3	5	5	2	27	6	11
60260025000	0	1	4	1	6	1	1	1	10	3	3	2	8	3	2	2	2	3	1	0	3	2	0	0	0	2	1	1	2	2	0	1	0	0	0	0	0	0	11	6	5	5	6	3	3	2	30	7	9
60260026000	0	1	4	1	4	1	1	0	7	1	1	1	3	3	2	2	1	1	1	0	1	1	0	0	0	1	1	1	1	1	1	1	0	0	0	0	0	0	8	4	2	1	2	1	2	1	13	7	4
60260027000	0	0	2	0	1	0	0	1	2	4	4	4	12	2	3	3	3	1	1	0	1	3	0	0	0	1	3	1	1	1	0	1	0	0	0	0	0	0	11	2	1	1	1	4	1	1	11	8	6
60260028000	1	1	3	1	0	1	1	0	3	3	3	2	8	2	3	4	2	2	2	0	2	1	0	0	0	1	2	1	1	1	0	0	0	0	0	0	0	0	7	2	3	4	1	1	2	1	14	9	8
60260029000	0	1	1	0	2	1	1	1	5	1	1	1	3	1	1	1	1	1	2	1	2	2	1	0	1	1	2	1	2	1	0	1	1	0	0	0	0	0	13	2	2	1	1	1	1	1	9	3	7
60260030000	0	1	7	1	1	1	1	1	5	5	5	4	14	4	3	3	2	2	1	1	1	2	0	0	0	1	1	1	1	1	0	1	0	0	0	0	0	0	8	6	2	6	2	5	5	1	27	10	7
60260031000	0	1	4	1	2	1	1	1	6	3	5	5	13	4	3	3	1	2	1	0	1	1	0	1	0	5	4	1	1	1	1	1	1	0	0	0	0	0	17	4	3	1	2	2	5	1	18	10	5
60260032000	0	1	11	1	4	1	1	0	7	3	4	2	9	4	1	3	2	3	2	0	1	2	0	0	0	2	2	1	1	1	0	1	0	0	0	0	0	0	10	6	4	1	4	4	4	4	27	8	8
60260033000	0	0	2	0	2	1	1	1	5	3	3	3	9	3	3	3	4	2	4	0	2	4	1	1	1	1	3	3	4	3	0	1	1	0	0	0	0	0	23	3	3	2	2	2	2	2	16	9	12
60260034000	0	1	1	1	3	1	1	1	7	3	4	2	9	2	2	3	2	2	2	0	1	1	0	0	0	1	1	1	2	1	0	0	0	0	0	0	0	0	7	3	3	1	1	1	1	1	11	7	7
60260035000	1	1	6	1	3	0	1	0	5	2	2	2	6	4	2	3	1	2	1	0	1	2	0	0	0	1	1	1	1	1	0	0	0	0	0	0	0	0	7	2	2	1	2	1	2	1	11	9	5
60260036000	1	1	4	1	4	1	1	1	8	2	2	2	6	3	5	5	3	5	1	0	1	1	0	0	0	2	5	1	1	1	1	1	1	0	0	0	0	0	14	3	5	1	2	2	3	2	18	13	10
60260037000	0	1	4	1	7	1	1	1	11	2	3	3	8	4	2	2	3	4	1	0	2	1	0	0	0	3	2	1	2	4	0	1	0	0	0	0	1	0	15	6	4	2	2	1	6	1	22	8	10
60260038000	1	0	3	0	4	1	0	0	5	3	2	3	8	2	3	3	4	2	3	1	1	1	0	0	0	1	1	1	1	2	1	1	1	0	0	0	0	0	10	2	2	3	4	2	2	3	18	8	11
60260039000	0	1	9	0	6	1	0	0	7	5	5	5	15	1	1	3	3	1	1	0	2	1	0	0	0	5	5	1	1	3	1	1	0	0	0	0	0	0	18	3	2	1	1	3	6	1	17	5	7
60260040000	0	0	5	1	7	1	1	1	11	3	2	3	8	4	1	1	3	5	1	0	3	1	0	0	1	2	3	1	1	1	0	1	0	0	0	0	0	0	11	6	3	1	5	2	4	2	23	6	12
60260041000	0	1	4	1	5	1	1	0	8	1	2	5	8	5	5	5	1	1	1	0	1	1	0	0	0	1	1	1	1	1	0	1	0	0	0	0	0	0	7	1	5	1	1	1	1	1	11	15	4
60260042000	1	1	11	1	2	1	1	1	6	3	4	3	10	4	3	5	4	4	1	0	2	3	0	0	0	2	3	1	3	1	0	1	1	0	0	1	0	0	16	5	3	2	2	3	1	3	19	12	11
60260043000	1	1	4	1	2	1	1	1	6	3	3	4	10	3	4	3	3	3	2	1	4	2	0	0	0	3	1	1	5	1	0	0	0	0	0	0	1	0	14	4	3	1	1	3	2	1	15	10	13
60260044000	1	1	4	1	7	1	1	1	11	3	3	4	10	3	2	3	3	3	3	0	2	2	0	0	0	2	2	1	2	1	0	0	0	0	0	0	0	0	10	5	4	3	3	1	5	2	23	8	11
60260045000	0	1	2	1	7	1	1	1	11	3	4	3	10	3	2	4	2	2	2	0	1	2	0	0	0	3	3	1	1	1	0	0	0	0	0	0	0	0	11	6	4	1	3	3	3	3	23	9	7
60260046000	0	1	2	1	7	1	1	1	11	1	3	2	6	2	1	1	3	2	4	0	3	3	1	0	0	1	2	2	2	2	0	1	0	0	0	0	0	1	15	5	3	5	5	2	2	3	25	4	12
60260047000	0	1	5	1	7	1	1	1	11	3	4	4	11	2	3	2	3	3	2	1	1	2	1	0	0	2	2	2	2	2	0	0	0	0	0	0	0	0	13	3	2	2	6	1	1	1	16	7	10
60260048000	0	1	3	1	7	1	1	1	11	1	2	3	6	2	2	1	4	3	3	0	3	4	0	0	0	2	1	1	1	1	0	0	0	0	0	0	0	0	10	6	4	3	3	5	1	5	27	5	13
60260049000	0	0	3	1	7	1	1	1	11	3	4	3	10	3	3	3	1	3	1	0	1	1	0	0	0	3	1	1	1	1	0	0	0	0	0	0	0	0	8	6	3	2	5	5	3	5	29	9	6
60260050000	0	0	3	1	6	1	1	1	10	4	4	4	12	1	1	3	1	3	2	0	1	1	0	0	0	3	1	1	1	1	0	0	0	0	0	0	0	0	8	5	3	1	1	1	4	2	17	5	7
60260051000	1	1	4	1	0	1	1	0	3	2	3	3	8	3	3	1	1	2	1	1	1	1	0	0	0	1	1	1	1	1	0	0	1	0	0	0	0	0	7	6	2	2	1	1	1	1	14	7	6
60260052000	0	1	5	1	6	0	1	1	9	1	1	1	3	3	3	3	2	2	2	0	2	2	1	1	0	2	2	2	2	2	1	0	0	0	0	0	1	0	16	2	2	2	2	2	4	2	16	9	8
60260054000	1	0	2	1	2	0	1	0	4	2	2	3	7	3	3	3	1	1	1	0	1	1	0	0	0	1	1	1	1	1	0	0	1	0	0	0	0	0	7	2	2	2	2	1	3	2	14	9	4
60260055000	0	1	5	1	7	1	1	1	11	4	3	3	10	3	4	4	1	1	1	0	1	1	0	0	0	1	2	1	1	1	0	1	1	0	0	0	0	1	10	2	3	1	1	2	3	1	13	11	4
60260056000	0	1	3	1	6	1	1	1	10	3	3	2	8	3	2	4	1	1	1	0	1	1	0	0	0	1	1	1	1	2	0	0	0	0	0	0	0	0	7	5	2	3	3	1	2	1	17	9	4
60260057000	0	1	2	1	7	1	1	0	10	3	2	2	7	3	2	2	2	1	1	0	1	2	0	0	0	4	1	1	1	1	0	1	0	0	0	0	0	0	11	4	3	3	3	2	4	2	21	7	5
60260058000	0	1	10	1	7	1	1	1	11	1	2	1	4	1	2	2	1	1	1	0	1	1	0	0	0	1	1	1	1	1	0	1	0	0	0	0	0	0	7	4	2	1	1	1	1	1	11	5	4
60260059000	0	1	5	0	3	1	1	0	5	4	4	3	11	5	3	1	1	1	2	0	2	1	0	0	0	1	1	1	1	1	0	0	1	0	0	0	0	0	7	5	2	1	3	1	1	1	14	9	6
60260060000	1	1	2	1	0	1	1	0	3	2	3	3	8	4	4	4	1	2	1	0	1	2	0	0	0	3	1	1	2	1	0	0	0	1	0	0	0	0	11	2	2	1	2	2	2	2	13	12	5
60260061000	1	1	6	1	2	1	1	0	5	2	2	2	6	4	2	1	1	1	1	0	1	1	0	0	1	3	4	1	1	1	0	0	0	0	0	0	0	1	13	6	2	1	1	1	1	1	13	7	4
60260062000	0	0	7	1	5	1	1	1	9	2	2	2	6	3	1	1	2	5	1	0	1	1	0	0	1	2	1	1	1	1	0	0	1	0	0	0	0	0	9	6	3	1	2	2	5	1	20	5	9
60260063000	1	1	5	1	2	1	1	0	5	2	1	2	5	4	1	1	1	1	1	0	1	1	0	0	1	2	4	1	1	1	0	0	1	0	0	0	0	0	12	6	2	1	1	1	2	1	14	6	4
60260002011-22602	0	0	5	1	3	1	1	1	7	2	3	4	9	4	3	4	3	2	1	1	2	2	0	0	0	2	4	1	1	1	0	0	1	0	0	0	0	0	12	3	2	2	2	5	2	2	18	11	9
60260004012-22503-22810	1	1	7	1	2	1	1	0	5	2	3	3	8	3	1	3	1	1	1	1	1	2	0	0	0	5	1	1	1	1	0	0	0	0	0	0	0	0	11	3	2	1	1	2	2	1	12	7	5
60260007001-10007	1	1	17	1	3	1	1	1	7	3	3	4	10	4	3	4	1	1	1	0	1	1	0	0	0	5	1	1	1	3	1	1	1	0	0	0	0	0	15	5	3	1	4	6	3	1	23	11	4
60260009001-22809	1	1	8	1	5	1	1	1	9	3	4	3	10	3	3	4	1	2	1	0	2	1	0	0	0	2	2	1	1	1.41389	0	0	0	0	0	0	0	1	9.41389	3	2	2	2	2	2	2	15	10	6
60260053001-10007	0	0	3	1	7	1	1	1	11	2	3	2	7	3	1	1	1	2	1	0	1	1	0	0	0	2	2	1	2	1	1	0	0	0	0	0	0	1	11	5	3	1	2	3	3	3	20	5	5
60260064001-10002	1	#NULL!	7	0	0	1	1	0	2	1	1	2	4	2	1	1	1	1	1	0	1	2	0	0	1	2	4	1	1	1	0	1	1	0	0	0	0	0	14	3	2	1	2	1	3	1	13	4	4
60270003000	0	1	15	1	4	1	0	0	6	2	2	2	6	4	1	4	1	1	1	0	1	1	0	0	0	1	1	1	1	1	0	1	0	0	0	0	0	0	7	3	2	1	2	1	3	1	13	9	4
60270006000	1	1	11	1	6	1	1	1	10	3	3	4	10	5	2	4	2	3	1	0	1	1	0	0	0	1	2	1	1	1	0	0	1	0	0	0	0	0	8	5	3	1	3	2	6	2	22	11	7
60270007000	1	1	7	1	7	1	1	1	11	2	2	3	7	2	2	3	1	2	1	0	1	4	0	0	1	2	2	1	1	1	0	0	1	0	0	0	0	0	13	3	3	2	2	2	2	2	16	7	5
60270010010	1	0	4	1	4	1	1	0	7	1	4	2	7	4	3	3	1	1	1	0	1	1	0	0	0	1	1	1	1	1	0	0	1	0	0	0	0	1	8	6	5	1	1	1	1	1	16	10	4
60270013010	0	0	2	1	3	1	1	0	6	2	2	1	5	4	1	2	1	1	1	0	1	2	0	0	1	1	1	1	1	1	0	1	0	0	0	0	0	1	10	5	2	3	3	1	4	1	19	7	4
[truncated: 575 more rows]
